# Supplementary material
Source: PubMed Central journal article supplement (PMC5008085)
Supplement: JVI.00972-16_zjv999181910so1.pdf [file JVI.00972-16_zjv999181910so1.pdf]

APOBEC3F

>panPan1

ATGAAGCCTCACTTCAGAAACACAGTGGAGCGAATGTATCGAGGCACATTCTTCTACAACCTTAAATAAGACCCATCCTTTCTCGTGGGAATACCGTCTGGCTGTGCTACGAA  
GTGAAAAACAAGGGTCCCTCAAGGCCCGCTTTGGACACAAAGATCTTTGAGGCCAGGTGATTTCCAGTTTGAGAACCCAGCAGAAATGTGCTTCTCTGGTCTGTGG  
CAACCAGCTGCCTGCTTACAAGTGCCTCCAGATCACCTGGTTTGTATCCTGGACACCCCTGCCCGGACTGTGGCGAAGCTGGCCGAATCTGGCTGAGCACCCCAATGT  
ACCTTGACCATCTCCGCTGCCCGCCTCTACTACTACTGGGAAAGAGATTACCGAAGGGCGCTCTGCAGGCTGCGTCAGGCAGGGGCCCGCGTGAAGTATGGCAGCAGAA  
GAATTTGCATACTGCTGGGAAACTTTGTGTACAGTGAAGGTACGACTTACCTTGGTACAAATTCGATGACAATTTATGCATTCTCCAGCCGCAAGCTAAAGGAGATTCTC  
AGAAACCCGATGGAGGCAATGTATCCACACATATTCTACTTCCACTTTAAAACCTACGCAAGCCATATGGTGGAAACGAAAGCTGGCTGTGTTCCACTGGAAGTTATGAA  
GCACCCTACCTGTCTCTGGAAAGGGGCGTCTTCCGAAACCAG-----

attttaaTATTGTTGGGAAAACCTTTGTGTACAATGATGATGAGCCATTCAGCCCTTGGAAAGGACTAAAAACAACCTTTCTATTCTGGACAGCAAGCTGCAGGAGATTCTCCAGT  
GA

>rhoRox1

ATGAAGCCTCAGTTCAGAAACACAGTGGAGCGAATGTATCGACGCACATTCTTCTACAACCTTAAATAACAGACCCATCCTTTCTCGTGGGAATACCGTCTGGCTGTGCTACGA  
AGTGAAAAACAAGGGTCCCTCAAGGCCCGCTTTGGACGCAAAAGATCTTTGAGGCCAGGTGATTTCCAGCCTCAGTACCACGCAAGAAATGTGCTTCTCTGGTCTGTG  
GGCAACAGCTGCCTGCTTACAAGGCTTCCAGATCACCTGGTTTGTATCCTGGACACCCCTGCCCGGACTGTGGCGAAGGTGGCCGAATCTAGCTGAGCACCCCAATGT  
TACCCCTGACCATCTCTGCTGCCCGCCTCTACTACTACTGGGAAACAGATTACCGAAGGGCGCTCCGAGGCTGCGTCAGGCAGGGGCCCGCGTGAAGATTATGGACGATGA  
GAAGAATTTGCATACTGCTGGGAAAACCTTTGTGTACAATGAAGTCAAGTTCATGCCTTTGGGACAAATTCGATGACAATTTATGCATTCTGCACAGCAAGCTAAAGGAGATT  
CTCAGAAACCCAAATGGAGGCAATGTATCCACACATATTCTACTTCCACTTTAAAACCTACGCAAGCCATATGGTGGAAACGAAAGCTGGCTGTGCTTCCACTGGAATTTAT  
AAAGCAATTTGCATACTGCTGGGAAAACCTTTGTGTACAATGAAGTCAAGTTCATGCCTTTGGGACAAATTCGATGACAATTTATGCATTCTGCACAGCAAGCTAAAGGAGATC  
TGTCTCTCAACACAACTACCAGGTACCTGGTACACATCTGGAGCCCTTGCTAGATTGTGCAGGGGAAGTGGCCGAGTTCTGGCCAGGCACAGCAACGTAAGCTG  
CCATCTTCGCCCGCCCTCTACTACTTCTGGGATATAGATTACCAGCAGGGGCTCCGACGCTGAGTGAGGAAAGGGGCTCCTTGGCGATCATGGACTGCAAGATTTTAA  
ATATTGTTGGGAAAACCTTTGTGTACAATGGTATGAGCTTCAAGCCTTGGAAAGGACTAAAAACAACCTTTCTATTCTGGACAGCAAGCTGCAGGAGATTCTCGAGTGA

>gorGor3

ATGAAGCCTCAGTTCAGAAACACAGTGGAGCGAATGTATCGAGGCACATTCTTCTACAACCTTAAATAACAGACCCATCCTTTCTCGTGGGAATACCGTCTGGCTGTGCTACGA  
AGTGAAAAACAAGGGTCCCTCAAGGCCCGCTTTGGACGCAAAAGATCTTTGAGGCCAGGTGATTTCCAGCCTCAGTACCACGCAAGAAATGTGCTTCTCTGGTCTGTG  
GCAACCAGCTGCCTGCTTACAAGGCTTCCAGATCACCTGGTTTGTATCCTGGACACCCCTGCCCGGACTGTGGCGAAGCTGGCCGAATCTGGCTGAGCACCCCAATGT  
CACCCTGACCATCTCTGCTGCCCGCCTCTACTACTACTGGGAAAGAGATTACCGAAGGGCGCTCCGAGGCTGCGTCAGGCAGGGGCCCGCGTGAAGATTATGGACGATGA  
AGAAATTTGCATACTGCTGGGAAAACCTTTGTGTACAATGAAGTCAAGTTCATGCCTTTGGGACAAATTCGATGACAATTTATGCATTCTGCACAGCAAGCTAAAGGAGATT  
TCAGAAACCCGATGGAGGCAATGTATCCACACATATTCTACTTCCACTTTAAAACCTACGCAAGCCATATGGTGGAAACGAAAGCTGGCTGTGCTTCCACTGGAATTTAT  
AAGCACCCTACCTGCTCTCGTGAAGAGGGGCGCTTCCGAAACCCAGGTGATCCTGACAGCCATTTGCATGCAAGAAAGTGGCTTCTCTGGTCTGTGACGACATAC  
TGTCTCTCAACACAACTACCAGGTACCTGGTACACATCTGGAGCCCTTGGCAGGATGTGCAGGGGAGGTGGCCGAGTTCTGGCCAGGCACAGCAACGTAAGCTGAAATTTAA  
CCATCTTACCAGCCCGCCTCTACTATTCTGGGATACAGATTACCAGGAGGGGCTCCGACGCTGAATCAGAAAGGGGCTCCGTGAAGATCATGGCTACAAAGATTTTAA  
ATATTGTTGGGAAAACCTTTGTGTACAATGATGATGAGCCATTCAGCCTTGGAAAGGACTAAAAACAACCTTTCTATTCTGGACAGCAAGCTGCAGGAGATTCTCGAGTGA

>panTro4

ATGAAGCCTCACTTCAGAAACACAGTGGAGCGAATGTATCGAGGCACATTCTTCTACAACCTTAAATAAGACCCATCATTCTCGTGGGAATACCGTCTGGCTGTGCTACGAA  
GTGAAAAACAAGGGTCCCTCAAGGCCCGCTTTGGACACAAAGATCTTTGAGGCCAGGTGATTTCCAGCCTCAGTACCACGCAAGAAATGTGCTTCTCTGGTCTGTG  
GCAACCAGCTGCCTGCTTACAAGTGCCTCCAGATCACCTGGTTTGTATCCTGGACACCCCTGCCCGGACTGTGGCGAAGCTGGCCGAATCTGGCTGAGCACCCCAATGT  
CACCCTGACCATCTCTGCTGCCCGCCTCTACTACTACTGGGAAAGAGATTACCGAAGGGCGCTCTGCAGGCTGCGTCAGGCAGGGGCCCGCGTGAAGATTATGGACGATGA  
AGAAATTTGCATACTGCTGGGAAAACCTTTGTGTACAATGAAGTCAAGTTCATGCCTTTGGGACAAATTCGATGACAATTTATGCATTCTGCACAGCAAGCTAAAGGAGATT  
CAGAAACCCGATGGAGGCAATGTATCCACACATATTCTACTTCCACTTTAAAACCTACGCAAGCCATTTGGTGGAAACGAAAGCTGGCTGTGCTTCCACTGGAAGTTATGA  
AGCACCCTACCTGCTCTCGTGAAGAGGGGCGCTTCCGAAACCCAGGTGATCCTGACAGCCATTTGCATGCAAGAAAGTGGCTTCTCTGGTCTGTGACGACATAC  
AGCACCCTACCTGCTCTCGTGAAGAGGGGCGCTTCCGAAACCCAGGTGATCCTGACAGCCATTTGCATGCAAGAAAGTGGCTTCTGGTCTGTGACGACATAC  
CCATCTTACCAGCCCGCCTCTACTATTCTGGGATACAGATTACCAGGAGGGGCTCCGACGCTGAATCAGAAAGGGGCTCCGTGAAGATCATGGCTACAAAGATTTTAA  
ATATTGTTGGGAAAACCTTTGTGTACAATGATGATGAGCCATTCAGCCTTGGAAAGGACTAAAAACAACCTTTCTATTCTGGACAGCAAGCTGCAGGAGATTCTCGAGTGA

>calJac3

-----  
-----  
-----

>nasLar1

ACGAATCCTCAAATCAGAAACACAGTGGAGCGAATGTATCAACGCACATTCTTCTACAACCTTAAATAAGACCCATCCTTTCTCGTGGGAATACCGTCTGGCTGTGCTACGAA  
GTGAAAAACAAGGGGCCCTCAGTGCCTACTTGGGGCACAAACATCTTTGAGGCCAG-----

CTGAGCACCTAATGTCACCCTGACCNTCTGCTGCCCGCCTCTACTACTACTGGGAAACAGATTACCGAGGGCGCTCTGCAGGCTGCGTCAGGCAGGGGCTCGCGTGA  
ACATCATGGACAATGAAGAATTTGCATACTGCTGGGAAAACCTTTGTGTACAATGGAGTCAAGTTCATCCTTGGGACAAATTCGATGACAATTTATGCATTCTGCACCCGCA  
AGCTAAAGGAGATTCTCAG-----CCTGTGA

>chlSab2

ATGAAGCCTCAGTTCAGAAACACAGTGGAGCGAATGTATCGAGGCACATTCTTCTACAACCTTAAATAACAGACCCATCCTTTCTCGTGGGAATACCGTCTGGCTGTGCTACGA  
AGTGAAAAACAAGGGGCCCTCAATGCCACTTGGGGCGAAAGATCTTTGAGGCCAGGTGATTTCCAGCCTCAGTACCACGCAAGAAATGTACTTCTCTCTGGTCTGTG  
GGCAACAGCTGCCTGCTTACAAGGCTTCCAGATCACCTGGTTTGTATCCTGGAAACCCCTGCCCGGACTGTGGCGAAGGTGACCGAATTCCTGGCTGAGCACCCCAATGT  
TCACCCTGACCATCTCCGCCCGCCGCTCTACTACTACTGGGGTAAAGATTGGCGGAGGGCGCTCTGCAGGCTGCAATAGGCAGGGGCTCGCGTGAAGATCATGGACGAT  
GAAGAATTTGCATACTGCTGGGAAAACCTTTGTGTACAATGGAGGTCAGCCATTCATGCCTTTGGGACAAATTCGATGACAATTTATGCATTCTGCACCTCAAGCTAAAGGAGAT  
TCTCAGAAACCCAAATGGAGGCAATGTATCCACACATATTCTACTTCCACTTTAAAACCTACGCAAGCCATTTGGTGGAAACGAAAGCTGGCTGTGCTTCCACTGGAAGTTATGA  
AAAGCAGTGTCACTGCTCTCGTGAAGAGGGGCGCTTCCGAAACCCAGGTGATCCTGAGAGCCGTTGTCATGCAAGAAAGTGGCTTCTCTCTGGTCTGCGAGGACATA  
CTGCTCCTAACACAGACTACCAGGTCACCTGGTACACATCTTGGAGCCCTTGCTAGATTGTGCAGGGGAGGTGGCCGAGTTCTGGCCGGGCACAGTAATGTGAAGCTCA  
CCATCTATACCGCCCGCCTCTACTACTTCTGGGATACAGATTACCAGGAGGGGCTCCGACGCTGAGTGAGGAAAGGGGCTCCGTGGAGATCATGGGCTACGAAGATTTTAA  
ATGTTGTTGGGAAAACCTTTGTGTACAATGATGATGAGCCGTTCAAGCCTTGGAAAGGACTAAAAACAACCTTTCTATTCTGGACAGCAAGCTGCAGGAGATTCTCGAGTGA

>salBol1

ATGAATCCACAGATCAGAAATCCCATGAAGTGCATGTATCAACACACATTCTATGAGAATTTGAAAATAAACCCGACCTCTCTGGTGAAGATGACTTGGCTGTGCTACGAA  
GTGAAGATAAAGGACACCTCAAAACTCCCTTGGAAACACAGGAGTCTTTGAGGCCAGGTCAATTTCAACCCTGAGCACCATGAGCAAAATGTACTTCTCTCTGGTCCGTTGG  
CAAACCTGCTGCCTGCTTACAAGGCTTCCAGATCACCTGGTTTGTATCCTGGAAACCCCTGCCCGGACTGTGGTGAAGGTGGCCGAATTCCTAGCTGAGCACCCCAATGT  
ACCTTGACCGCTTCCACTGCCCGCCTCTACTGCTACTGGAATAAAGATTGGCGGAGGGCAGCTTCAAGAGCTATGTCAGACAGGGGCCCGGTGGAAGATCATGGACTACGAA  
GAATTTGAATACTGCTGGGAAAACCTTTGTATATAAAGATATAAGCCATCCATGTTGGGACAAA-----GACAATTACCGATTCTCGCCCGCAAGCTACAGGAGATTCTCAG-----

GTCTATTGGAAGCCTCAACACCCACCCAGAGATGAGATTCTCCATTTGGTTCGAAAGTGGAAAGCCGATAGTGACCAGGAGTACGAGGTGACCTGGTTTGTGCTGGAGCC  
CTCGCCAGTGTGTGCAAGGAATGTGGCTGAGTTCTGGCCGAGGAGGAGGCTACCTGACCATCTTCTGGCCCGCCTCTACTACTTCTGGGACCCCAATGACTGGG  
AGGAGCTTGCAGAGCTGTGTACAGAGGAGGCCACCATGAAGATCATGAGTTACGCGCAATTTGAACTGTTGGGACTATTCTGGGACAAACAAACAGAGACATTCTCGCTC  
TTGGAATGAGCTAAATACA-----CATTAAGTGCATCAGCTGGGGAGGTTCTCAGGTGA

>papAnu2

ATGAAGCCTCAGTTCAGAAACACAGTGGAGCGAATGTATCGAGGCACATTCTTCTACAACCTTAAATAACAGACCCATCCTTTCTCGTGGGAATACCGTCTGGCTGTGCTACGA  
AGTGAAAAACAAGGGGCCCTCAATGCCACTTGGGACGCAAAAGATCTTTGAGGCCAGGTGATTTCCAGCCACAGTACCACGCAAGAAATGTGCTTCTCTGGTCTGTG  
GGCAACAGCTGCCTGCTTACAAGGCTTCCAGATCACCTGGTTTGTATCCTGGAAACCCCTGCCCGGACTGTGGTGAAGGTGGCCGAATTCCTAGCTGAGCACCCCAATGT  
TACCCCTGACCATCTCCGCCCGCCTCTACTACTACTGGGAAACAGATTATCGAAGGGCGCTCTGCAGGCTGCGTCAGGCAGGGGCTCAGCTGAAGATCATGGACAAT  
AAGAATTTGCATACTGCTGGGAAAACCTTTGTGTACAATGAAGTCAAGTTCATGCCTTTGGGACAAATTCGATGACAATTTATGCATTCTGCACAGTCAAGCTAAAGGAGATT  
TCAGAAACCCAAACGAGGCAATGGATCCAGGCACATTCTACTTCCACTTTAAAACCTACGCAAGCCATATGGTGGAAACGAAAGCTGGCTGTGCTTCCACTGGAATTTACA

AAAGCAGTGCTCAACTGTCTCCTGGAAGAGGGGCGCTTCCGAAACAGGtccatctctAGAGCCATTGTATGCAGAAAGGTCCTCCTCCTGGTTCTGCGAGGACATACTGT  
CTCCTAAACACAGACTACCAGGTACCTGGTACACATCTGGAGCCCTTGCCTAGATTGTGACAGGGAGGTGGCCgagttctggccaggccagcaagtaGTGAAGCTCGCCATCTTTGCT  
GCCCGCCTCTACTACTTCTGGGATACAGATTACCAGCAGGGGCTCCGCAGCCTGAGTGAGGAAGGGGCTCCGTGCAGATCATGGGCTACGAAGATTTAAATATTGTTGGG  
AAAACTTTGTGTACAATGGTGTATGAGCCGTTCAAGCCTTGGAAAGGGACTAAAATACAACCTTTCTATTCTGGACAGCAAGCTGCAGGAGATTCTCGAGTGA

>hg38

ATGAAGCCTCACTTCAGAAACACAGTGGAGCGAATGTATCGAGACACATCTCCTACAAGCTTTATAATAGACCCATCCTTTCTCGTGGAAATACCGTCTGGCTGTGCTACGAA  
GTGAAACAAAGGGTCCCTCAAGGCCCTTTGGAGCCAAAGATCTTCGAGCCAGGTTATTCAGCCAGCTGAGCACCACAGAAATGTCTTCTCCTCTGGTTCTGTG  
GCAACCAGCTGCCTGCTTACAAGTGTTCAGATCACCTGGTTTGTATCTCGAGCCCTGCCCCGACTGTGTGGCAAGCTGGCCGAATTCCTGGCTGAGCACCCCAATGT  
CACCTGACCATCTCCCGCCGCCCTCTACTACTCTGGGAAAGAGATTACCGAAGGGGCGCTGCGAGGCTGAGTCAGGCAAGGGGCCCCGCTGAAGATTATGGACGATgaa  
gAATTTGCATACTGCTGGGAAAACCTTTGTACAGTGAAGGTACAGCATTATGCCTGGTACAAAATCGATGACAATATGCAATTCCTGACCCAGCAGCTAAAGGAGATTCTC  
AGAAACCCGATGGAGCAATGTATCCACACATATCTACTTCCACTTTAAAACCTACGCAAGCCATATGGTCGGAACGAAAGCTGGCTGTGCTTCCACTGGAAAGTTGTAAA  
GCACCACTCACCTGTCTCCTGGAAAGGGGCGCTTCCGAAACAGGTGGATCTGAGACCAATGTCTATGCAGAAAGGTGCTTCTGCTTGGTTCTGTGACGACATACTG  
TCTCTAACACAACTACGAGGTACCTGGTACACATCTTGGAGCCCTTCCAGAGTGTGCGAGGGAGGTGGCCGAGTTCCTGGCCAGGCACAGCACTGAACTCAC  
ATCTTACCGCCCGCTCTACTACTCTGGGATACAGATTACCAGGAGGGGCTCCGACGCTGAGTCAAGAAAGGGGCTCCGTGGAGATCATGGGCTACAAAGATTTTAAAT  
ATTTGGGAAAACCTTTGTGTACAATGATGAGCCATTCAAGCCTTGGAAAGGACTAAAATACAACCTTTCTATTCTGGACAGCAAGCTGCAGGAGATTCTCGAGTGA

>macFas5

ATGAAGCCTCAGTTCAGAAACACAGTGGAGCGAATGTATCGAGGCACATTCTTCTACAACCTTTATAACAGACCCATCCTTTCTCGTGGAAATACCGTCTGGCTGTGCTACGA  
AGTGAAACAAAGGGGCCCTCAGTGCCTACTGGGCGACAAAGATCTTCGAGGCCAGGTGTATTCAGCCAGCTGAGCACCACGCAAAATGTCTTCTCTCTTGGTTCTGT  
GGCAACACAGCTGCCTACTTACAAAGGCTTCCAGATCACCTGGTTTGTATCTCGAGCCCTGCCCCGACTGTGTGGCAAGGTGGCCGAATTCCTAGCTGAGCACCCCTAATG  
TCACCTGACCATCTTCCCGCCGCCCTCTACTACTCTGGGAAACAGATTATCGCAGGGGCGCTGCGAGGCTGCTCAGGCAGGGGCCAGTGAAGATCATGGACTTGT  
AAGAATTTGCATCTGCTGGGAAAACCTTTGTACAATGAAGGTACAGTATTCATGCCTTGGGACAAATTCGATGACAATATGCAATTCCTGACCCGATGCTAAAGGAGATT  
TCAGAAACCCGATGGAGCAACATATCCACACATATCTACTTCCACTTTAAAACCTACGCAAGCCATATGGTCGGAACGAAAGCTGGCTGTGCTTCCACTGGAAATTA  
AAGCAGCACTCAACTGTCTCCTGGGAGAGCGGCGCTTCCGAAACAGGTGATCTGAGAGCCGTTGCCATGCAGAAAGGTGCTTCTCTCTGTTCTGCGAGGACATA  
CTGTCTCCTAACACAGACTACCGGCTCACCTGGTACACATCTGGAGCCCTTGCCTAGATTGTGCGAGGGAGGTGGCCGAGTTCCTGGCCAGGCACAGTAAATGTAAGACT  
GCCATCTTTGCTGCCCGCCTACTACTTCTGGGATCCACATTACCAGCAGGGGCTCCGACGCTGAGTGAGAAAGGGGCTCCGTGGAGATCATGGGCTACAAAGATTTTAA  
AATATTGTTGGGAAAACCTTTGTGTACAATGGTGTATGAGCCGTTCAAGCCTTGGAAAGGGACTAAAATACAACCTTTCTATTCTGGACAGCAAGCTGCAGGAGATTCTCGAGTGA

>nomLeu3

>ponAbe2

ATGAATCCTCAGTTCAGAAACACAGTGGAGCGAATGTATCGAGGCACATTCTTCTACAACCTTTATAACAGACCCATCCTTTCTCGTGGAAATACCGTCTGGCTGTGCTACAAA  
GTGAAACAAAGGGTCCCTCAAGGCCCTTTGAAACGCAAGATCTTCGAGGCCAGGTGTATTCGAGCCAGCTGAGCACCACGCAAAATGTCTTCTCCTCTTGGTTCTGTG  
GCAACCAGCTGCCTGCTTACAAGCCTTCCAGATCACCTGGTTTGTATCTCGAGCCCTGCCCCGACTGTGTGGCAAGGTGGCCGAATTCCTGGCTGAGCACCCCAATG  
TGACCTGACCATCTTCCCGCCGCCCTCTACTACTCTGGGAAACAGATTATCGCAGGGGCGCTGCGAGGCTGCGTCAAGGAGGGGCCACGCTGAGGATCATGGACTTGT  
GAAGACTTTGCATACTGCTGGGAAAACCTTTGTACAATGAAGGTACAGCATTATGCCTTGGGACAAATTCGATGACAATATGCAATTCCTGACCCGATGCTAAAGGAGATT  
CTCAGAAACCCGATGGAGCAACATATCCACACATATCTACTTCCACTTTAAAACCTACGCAAGCCATATGGTCGGAACGAAAGCTGGCTGTGCTTCCACTGGAAAGTTAC  
AAAGCACCACTCACCTGTCTCCTGGAAAGGGGCGCTTCCGAAACAGGTGGATCTGAGAGCCATTCGATGACAATATGCAATTCCTGCTTGGTTCTGACCAACACA  
CTGTCTCCTAACACAACTACCGGCTCACCTGGTACACATCTGGAGCCCTTCCGACAGTGTGCGAGGGAGGTGGCCGAGTTCCTGGCCAGGCACAGCAACGTGAATCTC  
ACCGTCTTCCCGCCCGCTACTACTTCTGGGATACAGATTACCAGCAGGGGCTCCGACGCTGAGTGAGAAAGGGGCTCCGTGGAGATCATGGGCTACAAAGATTTTAA  
AATATTGTTGGGAAAACCTTTGTGTACAATGATCATGAACCTTCAAGCCTTGGAAAGGGACTAAAACGCAACCTTTCTATTCTGGACAGCAAGCTGCAGGAGATTCTCAAGTGA

>rheMac3

ATGCAGCCTCAGTTCAGAAACACAGTGGAGCGAATGTATCGAGGCACATTCTTCTACAACCTTTATAACAGACCCATCCTTTCTCGTGGAAATACCGTCTGGCTGTGCTACGA  
AGTGAAACAAAGGGGCCCTCAATGCCACTTGGGACACAAAGATCTTCGAGGCCAGGTGTATTCAGCCAGCTGAGCACCACGCAAAATGTCTTCTCCTCTCGTTCTGT  
GGCAACCAGCTGCCTGCTAACAAGCCTTCCAGATCACCTGGTTTGTATCTCGAGCCCTGCCCCGACTGTGTGGCAAGGTGGCCGAATTCCTAGCTGAGCACCCCTAAT  
GTCACCTGACCATCTCTGCCCGCCCTCTACTACTACTGGGAAACAGATTATCGCAGGGGCGCTGCGAGGCTGCGTCAGGCA-----

AAACCCGATGGAGGCAACGATATCCACACATATCTACTTCCACTTTAAAACCTACGCAAGCCATATGGTCGGAATGAAACCTGGCTGTGCTTCCCGTGGAAAGTTAGAAAGC  
AGCACTCAACTGTCTCCTGGGAGACGGGCGCTTCCGAAACAGGTGATCTCGAGCCGTTGTCATGCAGAAAGGTGCTTCTCCTCTGGTTCTGCGAGGACATACCTGT  
TCTAACACAGACTACCAGTCAACAGCCTTCCAGATCACCTGGTTTGTATCTCGAGCCCTGCTGAGATTGTGCGAGGGAGGTGGCCGAGTTCCTGGCCAGCAGTAAATGTAAGCTCGC  
CTTTGCTGCCCGCTCTACTACTTCTGGGATACACATTACCAGCAGGGGCTCCGCAGCCTGAGTGAGAAAGGGGCTCCGTGGAGATCATGGGCTACAAAGATTTTAAATAT  
TGTTGGGAAAACCTTTGTGTACAATGGTGTATGAGCCGTTCAAGCCTTGGAAAGGGACTAAAATACAACCTTTCTATTCTGGACAGCAAGCTGCAGGAGATTCTCGAGTGA

APOBEC3G

>panPan1

ATGAAGCCTCACTTCAG-----  
GTGATTTCCAAACTTAAATACCACCCAGAGATGAGATTCTTCCACTGGTTCAGCAAGTGGAGGAAGCTGCATCGTACCAGGAGATGAGGTCACCTGGTACATATCCTGGA  
GCCCTGACACAAAGTGTACAAGGGATGTGGCCACGTTCTCGCCGAGGACCCGAAAGTTCACCTGACCATCTTTGTTGCCCGCCTCACTACTTCTGGGACCCAGATTACCA  
GGAGGCTCTTCCGACGCTGTGCAGAAAAGAGACGCTCCGCGTCCACCATAGAGATCATGAATATGACGaaTTTCAGCACTGTGGAGCAAGTGTGCTGATACAGCCAAAGA  
GAGCTATTTGAGCCTTGAATAATCTTgctlaaatatataatctactGCATCATCTGCGGGGAGATTCTCAGACACTCGATGATCCACCACATCTTCAACTTTAAACATGAAC  
TTGGGTGAGGAGCGCATGAGACTTACTGTGTTATGAGTGGAGCGCTGCACAAATGACACCCGGGCTGCTGAACCAGCGCAGGGGCTTCTATGCAACCAGgATCC  
ACATAAACATGGTTTCTCGAAGGCCGCTATGCAGAGCTGTGCTTCTCGAGCTGATTCCTTTTGGAAAGCTGGACCTGCACCAGGACTACAGGGTACCTGCTTCACTCC  
TGGAGCCCTGCTCAGCTGTGCCAGGAAATGGCTAAATTCATTTCAAATAAACAACACGCTGAGCCTGTGCATCTTCCGTCGCCGACATCATGATGATCAAGGAAGATGTCA  
GGAGGGGCTGCGCACCTTGCACAAAGGCTGGGGCCGAAATTTCAAATATGACATACAGGAAATTTAAGCACTGCTGGGACACCTTTGTGGACCACAGGATGTCCTTCCA  
GCCCTGGATGACTAGAGGAGCACAGCCACGCCCTGAGTGAGAGGCTGCAGGCCATTTCCAGAATCAGGGAACCTGA

>rhIRox1

ACGAATCCTCAAATCAGAAACATGGTGGAGGTAATGTATCCAAGAGATTCAAATCTTCTTCAAATAACAACCCATCCTTTCTCATCGAAATACCGTCTGGCTGTGCTACGAA  
GTGAAACAAAGGACCGTTCAGGGCCCTTTGGATGCAACATCTTTCAAGGCCAGGTGTGGCCCAAGGATAAGTACCACCCAGAGATGAGATTCTCCTCACTGGTTCCGCA  
AGTGGAGGACAGTGCATCATGACCAGGAGTACGAGGTACCTGGTACGATCTCGAGGCCCTGTGCAAGGTGTGCAACAGTGTGGCCACGTTCTGCGCCAGGACCCCA  
AAGTTTACCCTGACCATCTTTGTTGCCCGCCTCTACTTCTTCTGGAACACAGATTACCAAGGAGGCGCTTCCGAGCCTATGTGCAAAAAGAGGCGCTCCGACCCAGCATGA  
AGATCATGAATATCACGAATTTACGACTGTTGGGACAAGTTCGTGTACCGCCAAAAAGCCATTTAAGCCTCGGGAATATGCCTAAACATTATACATTAAGTGCACACCA  
TACTGGGGGAGCTTCTCAGACATTTGATGGATCCAGACACGTTCACTTCAACTTTAAACATGAACCTTGGGTGAGTGGACAGCATGAGTCTTACCTGTGTACAAGGTTGGAG  
CGCCTGGACAATGGCACCTGGGTCGCGATGGACAAGCACAGGGGCTTTTACACAACACAGGCTTCAAATAAAGGATGTTTTCCATAAAGGCCCATGAGAGCTGTGCTTCT  
CTGGACCTAATTTCCCTTTTGGAAAGCTGGAT---  
GGCCAGCAATACAGGTTACTGCTTCCACTCCTGGAGCCCTGCTTACGCTGTGCCAGGAAATGGCTACATTCATTTCAAATAACAACACAGTGTGAGCTTGGCGGCTTCTCG  
CTGCCCGCATCTATGATGATCAAGGAAGAGGTGAGGAGGGCTGCGTGCCTGCACACGGCTGGGGCCGAAATGCAATGATGAACACAGTGAATTTAAGCACTGCTGGG  
ACACCTTTGTGGACCAGGACGCTCCCTCCAGCCCTGGGATGGACTGAGTACAGCAGGCAAGCCCTGAGTGGGAGGCTTGGGCCATTCTCCAGAATCAGGGAACCT  
GA

>gorGor3

ATGACGCCTCAGTTCAGAAACACAGTGGAGCGAATGTATCGAGACACATTCTTCTACAACCTTTATAATAGACCCATCCTTTCTCGTGGAAATACCGTCTGGCTGTGCTATGAA  
GTGAAACAAAGGATCCCTCAAGGCCCTTTGGAGCCAAAGATCTTCGAGGCCAGGTGTATTCGAACTTAAAGTACCACCCAGAGATGAGATTCTTCCACTGGTTCTAGCAA  
GTGGAGGAAGTGCATCTGTGACCCAGGAGTATGAGGTACCTGGTACATATCTCGAGCCCTGACAAAGTGTACAAGGAATGTGGCCACATTCCTGGCCGAGGACCCGAA  
GGTTACCCTGACCATCTTTGTTGCCCGCCTCTACTACTTCTGGGACCAAGATTACCAGGAGGGGCTTCCGAGCCTGTGTCAGAAAGAGACCGTCCCGCTGCCACCATGAAG  
ATCATGAATATGACAAATTTACGACTGTTGGAGCAAGTTCGTGTACAGCCAAAGAGGACTATTTGAGCCTTGAATAATCTGCCTAAATATTTATTTGTTACTGACACATGAG  
CTGGGGGAGATTCTCAGACACTGATGGATCCACCACATTACAGTCCAACTTTAAACATGAACATTTGGCTCAGAGGACGATGAGACTTCTGATTTGATGAGTGGAGC  
GCCTGCACAAATGACACCTGGGCTGCTGAACCAGCGCAGGGGCTTCTATGCAACCAGGCTCCACATAAACACGGTTTCTTGAAGGCCGCTATGACAGGCTGTGCTTCT  
GGACGTTATTCCTTTTGAAGCTGGACTGCACCAGGACTACAGGGTTACTGCTTCACTCCTGGAGCCCTGCTTCACTGTGCCAGGAAATGGCTAAATTTCAATTTCA



ACGAATCCTCAAATCAGAAACATGGTGGAGCCAAATGGATCCACGCACATCTGCTCCAACCTTCAATAACAGACTTATCCTTTCTGGTCTGAATACCGTCTGGCTGTGCTCGA  
AGTGAAAACAAAGACCCTTCGGGGCCCTTTGGACGCAAAAGATCTTTCAAGGCAAGGTGTACTCCAAGGCTAAGTACCACCCAGAGATGAGATTCTCCGCTGGTTCCAC  
AAGTGGAGGCGCTGCATCATGACCAGGAGTACAAGTCACTGGTACGTATCCTGGAGCCCTGCACAAGGTGTGCAACAGTGTGGCCACGTTCTGGCCAAAGACCCG  
AAGGTTACCCCTGACCATCTTTGTTGCCCGCCTACTACTTCTGGAACCCAGATTACCAGCAGGCGCTTCCGATCCTGTGTGAGAAAAGAGGCGTCCACATGCCACCATGAA  
GATCATGAATTAACCAAAATTCAGACTGTTGGAACAAGTTCGTGGACGGCCGAGGAAAGCCATTTAAGCCTCGGAACAATCTGCCTAAACATTTATACATTTACTGAGGCCA  
CGCTGGGGGAGCTTCTCAGACATTTGATGGATCCAGGCACGTTCACTTCCAACCTTTAACAATAAACCTTTGGGTGAGTGGACAGCATGAGACTTACCTGTGTTACAAGTGGAG  
CGCTGCACAATGACACCTGGTTCGGCTGAAACCAGCACAGGGGCTTTACGCAACCAGGCTCCAATAATACACGGTTTCCCTAAAGGCCGCGCATGCAGAGCTGTGCTTC  
CTGGACCTGATTCCTTTTGAAGCTGGAT---  
GGCCAGCAATACAGGGTTACCTGCTTACCTCCTGGAGCCCTGCTTTAGTGCGCCAGGAAATGGCTAAATTCATTCAAATAACGAACACGTGAGCTTGTGCATCTTCGC  
TGCCCGCATCTATGATGATCAAGGAAGATATCAGGAGGGGCTGCGCACCTTGCACAGGGATGGGGCCAAATTTGCAATGATGAACACAGTGAATTTGAGTACTGCTGGGAC  
ACCTTTGTGGACCCGACGGGACGTCCTTCCAGCCCTGGGATGGACTAGATGAGCACAGCCAGCCCTGAGTGAGAGGCTTCCGGGCATTCTCCAGAATCAGGGAAACTGA  
>nomLeu3

-----AGTTTGAGTACTGCTGGGACACCTTTGTGGACCACCAGGACGTCCTTCCAGCCCTGGGAT-  
GACTAGATGAGCACAGCCAGCCCTGAGTGGGACGCTGAGGACCATTATCAGAATCAGGGAAACTGA  
>ponAbe2  
ATGAATCCTCAGTTCAGAAACATGGTGGATGGAATGGATCCACACAAAATTCCTCAACACTTTAAAAATAGACCATCCTTTCTCGTCGGAATACCGTGTGGCTGTGCTACGAA  
GTGAAAACAAAGGGTCCCTCAAGGCCCTTTGGACGCAAGATCTTTGAGGCCAGGTGTATTCGAGCTTAAAGAACCCAGAGATGAGATTCTCCACTGGTTCAGCA  
AGTGGAGGACGCTGCATGACGAGGAGTGCAGGTCACCTGGTACATGCTGGAGCCCTGCACAAGGTGTACAAGGAATGTGGCCACGTTCTGGCCGAGGACCCG  
AAGGTTACCCCTGACCATCTTTGTTGCCCGCCTACTACTTCTGGGACCCAGATTACCAGGAGGCGCTTCCGACGCTGTGTGCGGAAAGAGACGCTCCGCTGCCAACATGA  
AAATCATGAATACGACGAATTCAGCACTGTTGGAACAAGTTCGTGTACAGCCAAAGAGAGCTATTTGAGCCTTGAATAATCTGCCTAAATATTATATA-----  
GGAGATTTCTAGACACTCAATGGATCCACTCACATTTCAACTTTAAACATGAACCTTGTGGAGGACGCGCATGAGACTTACCTGTGTTAAGGTGGAGCGCCCTGC  
ACAATGACACCTGGTCCGCTGTAACACGCGCAGGGGCTTCTATGCAACAGGCTCCAGCTATACATGTTTCCCTGAAGGCCGCTGAGAGCTGTGCTGCTGGAGC  
TGATCCGTTTGGAAAGCTGACGCGCTACAGGTTACGCTTCACTGCTTCAACACTTGGAGCCCTGCTTCCGCTGTGCCCAGGAAATGCTAAATCTTCAAATAA  
CCAACACGTGAGCCTGTGCATCTTCGCTGCCGCATCTATGATGATCAAGGAAGATGTAAGGAGGGGCTGCGCACCTGGACGAGGCTGAGGCCAAAATTTCAATAATGACA  
TACAGTGAATTCAGCATGCTGGGACACCTTTGTGGACCACCAGGGACGTCCTTCCAGCCCTGGGATGGACTAGAGGAGCACAGCGAAGCCTGGAGTGGGAAGCTGCAG  
GCCATTTCCAGAATCAGGAAACTGA  
>rheMac3  
ATGAATCCTCAAATCAG-----

AVPR1  
>panPan1  
ATGCGTCTCCGCGCGTCCGACGCGGGGCCCTCGGGCAACTCCAGCCCATGGTGGCCCTGGCCACCGGCGCTAGCAACACAAGCCGGGAGGCCGAAGCCCTCGGGG  
AAGGCAACGGCCACCGAGGGAGCTGCGCAACGAGGAGCTGGCCAACTGGAGATCGCGGTGCTGGCCGTTGACTTTCCGCGTGGCCGCTGCTGGGCAACAGCAGCGTACT  
GCTGGCTCTGCACCGGACGCGCGCAAGAGCTCCCGCATGCATCTTTCATCCGACACCTCAGCCTGGCCGACCTGGCCGTGGCATTCTCCAGGTGCTGCCCAAATGTG  
CTGGGACATCACTACCGCTTCCGCGGCCCGGACTGGCTGTGCGCGGTGGTGAAGCACTGCAGGTTTCGGCATGTTCCGCTGGCCCTACATGCTGGTATGATGACAGC  
CGACCGCTACATCGCCGTGTGCCACCCGCTCAAGACTCTGCAACAGCCCGCGCGCTCGCCGCTATGATCGCGCGCCGCTGGGTGCTGAGCTTCTGCTGAGCAGC  
CGCAGTACTTCGCTTCTCCATGATCGAGGTGAACAATGTCACCAAGGCCCGCAGCTGCTGGGCCACCTTCATCCAGCCCTGGGGTTCGCTGCTACGTCGATGATGAC  
GGCGGACATCTTTGTGGCCCGCTGGTTCATCTGGGTACCTGCTGACGCTTCACTGCTACAACACTTGGCGCAACGTCGCGGGAAGACGCGCTCGCGCCAGCAAGG  
GTGCAGAGCAAGCGGTGTGGCCTTCAAAGGGGTTCTGCTCGCACCTGTGTGACGACGCTGAAGTCCATTTCCCGGGCAAGATCCGACCGTGAAGATGACTTTTG  
TGATCGTACCGCTTACATCGTGTGCTGGGCGCTTCTTTCATCATCCAGATGTTGTTGCTGGATCCCAAGTCCGCTGGACCGAATCGGAAAAccctaccatccatcaactca  
TTACTGGGTTCTTGAACCGCTGTAATCCCTGGATATACATGTTTTAGTGGTACCTCCTCAGGACTGTGTTCAAAGCTTCCATGCTGcctcaaatgaagaaatcaAC  
AAAGAGATACGACAGTATGAGCAGAAGACAGACTTTTTATTTCAACAAATCGAAGCCCAACAAACAGCACGGGTATGTGAAGGACTCGCCTAAATCTTCAAAGTCCATCAA  
ATTCATTCTGTTCAACTTGA  
>rhiRox1  
ATGCGTCTCCGCGCGTCCGACGCGGGGCCCTCGGGCAACTCCAGCTCATGGTGGCCTCTGGCTACCGGCGCTGGCAACAGCAGCCGGGAGGCCGAAGCCCTCGGAG  
AAGGCAACGGCCCGCGAGGGAGCTGCGCAACGAGGAGCTGGCCAACTGGAGATCGCGGTGCTGGCCGTTGACTTTCCGCGTGGCCGCTACTGGGCAACAGCAGCGTACT  
GCTGGCTCTGCACCGGACGCGCGCAAGAGCTCCCGCATGCACCTTTCATCCGACACCTCAGCCTGGCCGACCTGGCCGTGGCATTCTCCAGGTGCTGCCCAAATGTG  
CTGGGACATCACTACCGCTGTGCCACCCGCTCAAGACTCTGCAACAGCCCGCGCACCGCTCGCCGCTCATGATCACGGCCGCTGGGTGCTGAGCTTCTGCTGAGCATGC  
CGCAGTACTTCGCTTCTCCATGATCGAGGTGAACAATGTCACCAAGGCCCGGACTGCTGGGCCACCTTCATCCAGCCCTGGGGTTCGCTGCTACGTCGATGACGATGAC  
GGCGGCTTCTTGGAGCGCGCTGTAATCCCTGGATATACATGTTTTAGTGGTACCTGCTACAACACTTGGCGCAACGTCGCGGGAAGACGCGCTCGCGCCAGCAAGG  
GTGCAGAGCAAGCGGTACCGCCTTCAAAGGGGTTCTGCTTGCACCCGCTGTGTCAGCAGCGTGAAGTCCATTTCCCGGGCAAGATCCGACCGTGAAGATGACTTTTG  
TGATCGTACAGCTTACATCGTCTGCTGGGCGCTTTTTTTCATCATCCAGTGTGCTGCTGGATCCCAAGTCCGCTGGACCGAATCGGAAAACccctaccatccatcaactca  
ACGGCATTACTGGTTCCTTGAATAGCTGCTGTAATCCCTGGATATACATGTTTTAGTGGCATTCTCCTTCAAGACTGTGTTCAAAGCTTCCCATGCTGCCAAAACATTAAG  
GAAAATAACAAGAAAGATGATGACAGTATGAGCAGAAGACAGACTTTTTATTTCAACAGTGAAGCCCAACAAACAGATGGGTACATGGAAGGACTCGCCTAAATCTTC  
CAAGTCCGTTCAAATTCATCTGTTTCAACTTGA

>gorGor3  
ATGCGTCTCCGCGCGTCCGACGCGGGGCCCTCGGGCAACTCCAGCCCATGGTGGCCTCTGGCCACCGGCGCTGGCAACACAAGCCGGGAGGCCGAAGCCCTCGAGG  
AAGGCTACGGCCACCGAGGAGCTGCGCAACGAGGAGCTGGCCAACTGGAGATCGCGGTGCTGGCCGTTGACTTTCCGCGTGGCCGCTGCTGGGCAACAGCAGCGTACT  
GCTGGCTCTGCACCGGACGCGCGCAAGAGCTCCCGCATGCACCTTTCATCCGACACCTCAGCCTGGCCGACCTGGCCGTGGCATTCTCCAGGTGCTGCCCAAATGTG  
CTGGGACATCACTACCGCTCC-----  
GCATGTTCCGCTCGCCATATGCTGGTATGATGACAGCCGACCGCTACATCGCGGTGTGCCACCCGCTCAAGACTCTGCAACAGCCCGCGCGCTCGCCGCTCATGA  
TCGCGCCGCTGGGTGCTGAGCTTCTGCTGAGCAGCCGAGTACTTCTGCTTCCATGATCGAGGTGAACAATGTCACCAAGCCCGGAGTCTGCTGGCAACAGCAGCTTCA  
TCCAGCCCTGGGGTTCGCTGCTACGTCGATGACGGGCGGATCTTTGTGGCCCGCTGGTTCATCTGGTACCTGCTACGGCTTTCATGCTACAACATCTGGC  
GCAACGCTCCGCGGAAGACGGGCTCGCGCCAGAGCAAGGTTGCAGAGCAAGCGGTTGTCGCTTCAAAGGGGTTCTGCTGCAACCCCTGTGTGAGCAGCGTGAAGTGC  
CATTTCCCGGGCAAGATCCGACCGGTGAAGATGACTTTTGTGATCGTACGCGGCTACATGCTGCTGGGCGCCTTTCTTTCATCCAGTGTGGTCTGCTGGGATCCC  
AAGTCTGTGGACCGAATCAAGAAACCTACCATCACCATCACTGCTGCTGGTTCCTTGAATGCTGCTGTAATCCCTGGATATACATGTTTTTGTGGCATTCTCCTT  
CAAGACTCGGTTCAAAGCTTCCATGCTGCAAAACATGAAGGAAATCAACAAGAAATACTGACAGTATGAGCAGAAGACAGACTTTTTATTTCAACAAATCGAAGGCC  
AACAACAGTACGGGTATGTGAAGGACTCGCCTAAATCTTCAAAGTCCATCAAATTCATTCTGTTTCAACTTGA

>panTro4  
ATGCGTCTCCGCGCGTCCGACGCGGGGCCCTCGGGCAACTCCAGCCCATGGTGGCCTCTGGCCACCGGCGCTGGCAACACAAGCCGGGAGGCCGAAGCCCTCGGG  
GAAGGCAACGGCTCACCGAGGAGCTGCGCAACGAGGAGTGGCCAACTGGAGATCGCGGTGCTGGCCGTTGACTTTCCGCGTGGCCGCTGCTGGGCAACAGCAGCGTACT  
TGCTGGTCTGCACCGGACGCGCGCAAGAGCTCCCGCATGCATCTTTCATCCGACACCTCAGCCTGGCCGACCTGGCCGTGGCATTCTCCAGGTGCTGCCCAAATGTG  
GCTGGGACATCACTACCGCTCCGCGGCCCGGACTGGCTGTGCCGCTGGTGAAGCAGCTGCAGGTTTCCGCGATGTTCCGCTGGCCCTACATGCTGGTATGATGACA  
GCCGACCGCTACATCGCCGTGTGCCACCCGCTCAAGACTCTGCAACAGCCCGCGCGCTCGCCGCTCATGATCGCGCCCGCTGGGTGCTGAGCTTCTGCTGAGCAGC  
GCCGAGTACTTCTGCTTCTCCATGATCGAGGTGAACAATGTCACCAAGGCCCGGACTGCTGGGCCACCTTCCAGCCCTGGGGTTCGCTGCTGCAACCCCTGTGTGAGCAGC  
GACGGCGGCAATTTGTGGCCCGCTGGTTCATCTGGTACCTGCTACGCGCTTCACTGCTACAACACTTGGCGCAACGTCGCGGGAAGACGCGCTCGCGCCAGGAT  
AGGCTGCAGTAAAGCTTCCATGCTGCAAAACATGAAGGAAATCAACAAGAAATACTGACAGTATGAGCAGAAGACAGACTTTTTATTTCAACAAATCGAAGGCC  
CATCACTGACTTACTGGTTCCTTGAATAGCTGCTGTAATCCCTGGATATACATGTTTTTGTGGCATTCTCCTTCAAGACTGTGTTCAAAGCTTCCCATGCTGCCAAAACAT

GAAGGAAAAATTCACAAAGAAGATACTGACAGTATGAGCAGAAGACAGACTTTTTATTCTAACAAATCGAAGCCCAACAAACAGCACGGGTATGTGGAAGGACTCACCTAAAT  
CTTCCAAGTCCATCAAATTCATTCTGTTTCAACTTGA

>calJac3

ATGCGTTTCTCCACCGGCCCCGATGCGGGCCCCCTCGGGCAACTCCAGCCCATGGTGGCCTTGGTCCACCGCGGGTCCAAACACGAGCCAGGAGACCCGAACCCCTTTGGAGA  
AGGTAAATGGCCCGCCAAAGACGAGCGCAACGAGGAGCTAGCCAACTGGAGATCGCCGTGCTGGCCGTGACCTTCGAGTGGCCGTGGGCAACAGCAGTGTGCTGC  
TGGCGCTGACCGGACCGCCGCGCAAGACTTCCCGCATGCACCTTTATCCGACACCTCAGCCTGGCCGACCTGGCCGTGCGCTTCTCCAGGTGCTGCCGACATGTGCT  
GGGACATCACCTACCGCTTCCGCGGGCCGACTGGCTGTGCCGGTGAAGCACCTGCAAGTGTGGCATGTTCGCATCGCCCTTACAGTGTAGTAGTACATGACGGCAG  
ACCGCTACATCGCGGTGTGCCACCCGCTCAAGACTCTGCAACAGCCCGCGCCGCTCGCGCTCATGATAGGGCCGCTGGGTGCTGAGCTTCTGCTGAGCACGCCG  
CAGTACTTCTGCTTCTCCATGATCGAGGTGAACAATGTCAACAGGCCCGGACTGCTGGGCCACCTTATCCAGCCCTGGGGTCCCGTGCCTACGTTGACCTGGATGACG  
GGCGGCATCTTCTGGCGCCGCTGGTCACTTGGGTACCTGCTACGGCTTCACTGTCGACACCTTGGGCAACGCTCCGCGGAAAGACCCGCTCCGCGCAAGAACAGG  
CGCAGAGCAAGCGGGTGGTCCCTCCAAAGGGGTTCTGCTCGCGCTTGTGCTAGTAGCCTGAAGTCCATTTCCCGCGCAAGATCCGCGACGGTGAAGATGACTTTTTGT  
GATCGTGACGGCTTACATCATTGTGGCCACCTTTTTTCATCATCCAGAGTGGTGTGCTGGAAGTCCCACTCCATCTGGACCAGAACTCCGAAACCCCTACCATGACCATCA  
CTGCATTACTGGCTTCTTGAATAGTGTGCAATCCCTGGATATACATGTTTTTATGGCCATCTCCTTCAAGACTGTATTCAAAGCTTCTGCTGCTGCCAAACTTGAAG  
AAAAATTCACAAAGAAGACTGACAGTACGAGCAGGAACAGACTTTTTACTCTAACTACCGAAGCCCAACAAACAGTACAGTTACATGGAAGGACTCACCTAAATCTTCCA  
GGTCCATCAAATTCATTCTGTTTCAACTTGA

>nasLar1

ATGCGTTTCTCCGCGGTCGCCGACGCGGGGCCCTCGGGCAACTCCAGCTCATGGTGGCCTTGGTACCAGCGTGGCAACACGAGCCGAGGAGCCGAAGCCCTCGGAG  
AAGGCAACGCGCCCGGAGGACGTGCGCAACGAGGAGCTGGCCAAAGTGGAGATCGCCGTGCTGGCGGTGACTTTCGCGGTGGCCGTACTGGCAACAGCAGCGTGTCT  
GCTGGCTTGCACCGGACGCGCGCAAGACGTCGCCCATGCACCTTTCATCCGACACCTCAGCCTGGCCGACCTGGCCGTGGCCCTTCTCCAGGTGCTGCCGCAATGT  
TCTGGGACATCACCTACCGCTTCCGCGGGCCGACTGGCTGTGCCGGTGAAGCACCTGCAAGTGTGGCATGTTCCGCGTGGCCCTTACGTTGCTGGTAGTCAATGACA  
CGCCGCGCTACATCGCGGTGTGCCACCCGCTCAAGACTCTGCAACAGCCCGCGCCGCTCGCGCTCATGATCGCGCCGCTGGGTGCTGAGCTTCTGCTGAGCAT  
GCGCAGTACTTCTGCTTCCATGATCGAGGTGAACAATGTCAACAGCCCGGACTGCTGGGCCACCTTTCATCCAGCCCTGGGGTCTGCTGGTACGATCAACATCA  
GACGGGCGGCATCTTCTGGCGCCGTTGGTCACTTGGTACTTGTACGGCTTCACTGCTACAACATCTGGCGCAACGCTCCGCGGGAAGACGGCGTCCGCGCAGAGCA  
AGGGTGCAGAGCAAGCGGGTACCCTTCCAAAGGGGTTCTGCTTGCACCCTGTGTCAGCAGCGTGAAGTCCATTTCCCGGGCCAAAGATCCGACCGTGAAGATGACTTT  
TTGTGATCGTGACAGCTTACATCATCTGCTGGCGCCCTTCTCATCATCCAGATGGTGTGCTGCTGGATCCCAAGTCCGCTGGACCAGAACTCCGAAACCCCTACCATCAC  
ATCACGGCATTACTGGGTTCTTGAATAGTGTGTAATCCCTGGATATACATGTTTTTATGGCCATCTCCTTCAAGACTGTGTTCAAAGCTTCCCATGCTGCCAAACATT  
AAGGAAAAATTCACAAAGAAGATACTGACAGTATGAGCAGAAGACAGACTTTTTATTCTAACAAATCGAAGCCCAACAAACAGTACGGGTACGTTGAAGGACTCGCCTAAATCT  
TTCCAAGTCCATCAAATTCATTCTGTTTCAACTTGA

>chiSab2

ATGCGTTTCTCCGCGGTCGCCGACGCGGGGCCCTCGGGCAACTCCAGCTCATGGTGGCCTTGGTACCAGCGTGGCAACACGAGCCGAGAGCCGAAGCCCTCGGGG  
AAGGCAACGCGCCCGGAGGAGTGTGCGCAACGAGGAACTGGCCAACTGGAGATCGCCGTGCTGGCGGTGACTTTCAGCGTGGCCGTGGGCAACAGCAGCGTGT  
GCTGGCTTGCACCGGACGCGCAAGACGTCGCCCATGCACCTTTCATCCGACACCTCAGCCTGGCCGACCTGGCCGTGGCCCTTCTCCAGGTGCTGCCGCAATGT  
CTGGGACATCACCTACCGCTTCCGCGGGCCGACTGGCTGTGCCGGTGGTGAAGCACCTGCAAGTGTGGCATGTTCCGCGTGGCCCTACATGCTGGTAGTATGACAGC  
GACCCGCTACATCGCGGTGTGCCACCCGCTGAAGACTCTGCAACAGCCCGCGCCGCTCGCGCTCATGATCGCGCCGCTGGGTGCTGAGCTTCTGCTGAGCACGCG  
CGCAGTACTTCTTCCATGATCGAGGTGAACAATGTCAACAGCCCGGACTGCTGGGCCACCTTTCATCCAGCCCTGGGGTCTGCTGGTACGATGACAGTGGATGAC  
GGCGCGCATCTTCTGGCACCTGTGCCATCCTGGTACCTGCTACGGCTTCACTGCTACAACATCTGGCGCAACCTCCGCGGGAAGACGCGCTCGCGCAGAGCAAG  
GTGCAGAGCAAGCGGGTGTGCCCTTCCAAAGGGGTTCTGCTTGCACCCTGTGTCAGCAGCGTGAAGTCCATTTCCCGGGCCAAAGATCCGACCGTGAAGATGACTTT  
TGATTGTGACGGCTTACATGCTGCTGGCGCCCTTCTCATCATCCAGATGGTGTGCTGCTGGATCCCAAGTCCGCTGGACAGAACTCCGAAACCCCTACCATCACCATC  
ACGGCATTACTGGGTTCTTGAATAGTGTGTAATCCCTGGATATACATGTTTTTATGGCCATCTCCTTCAAGACTGTGTTCAAAGCTTCCCATGCTGCCAAACATTAA  
GAAAAATTCACAAAGAAGATACTGACAGTATGAGCAGAAGACAGACTTTTTATTCTAACAAATCGAAGCCCAACAAACAGTACGGGTACGTTGAAGGACTCGCCTAAATCT  
TTCCAAGTCCATCAAATTCATTCTGTTTCAACTTGA

>chiSab2

ATGCGTTTCTCCGCGGTCGCCGACGCGGGGCCCTCGGGCAACTCCAGCTCATGGTGGCCTTGGTACCAGCGTGGCAACACGAGCCGAGAGCCGAAGCCCTCGGGG  
AAGGCAACGCGCCCGGAGGAGTGTGCGCAACGAGGAACTGGCCAACTGGAGATCGCCGTGCTGGCGGTGACTTTCAGCGTGGCCGTGGGCAACAGCAGCGTGT  
GCTGGCTTGCACCGGACGCGCAAGACGTCGCCCATGCACCTTTCATCCGACACCTCAGCCTGGCCGACCTGGCCGTGGCCCTTCTCCAGGTGCTGCCGCAATGT  
CTGGGACATCACCTACCGCTTCCGCGGGCCGACTGGCTGTGCCGGTGGTGAAGCACCTGCAAGTGTGGCATGTTCCGCGTGGCCCTACATGCTGGTAGTATGACAGC  
GACCCGCTACATCGCGGTGTGCCACCCGCTGAAGACTCTGCAACAGCCCGCGCCGCTCGCGCTCATGATCGCGCCGCTGGGTGCTGAGCTTCTGCTGAGCACGCG  
GGCGCGCATCTTCTGGCACCTGTGCCATCCTGGTACCTGCTACGGCTTCACTGCTACAACATCTGGCGCAACCTCCGCGGGAAGACGCGCTCGCGCAGAGCAAG  
GTGCAGAGCAAGCGGGTGTGCCCTTCCAAAGGGGTTCTGCTTGCACCCTGTGTCAGCAGCGTGAAGTCCATTTCCCGGGCCAAAGATCCGACCGTGAAGATGACTTT  
TGATTGTGACGGCTTACATGCTGCTGGCGCCCTTCTCATCATCCAGATGGTGTGCTGCTGGATCCCAAGTCCGCTGGACAGAACTCCGAAACCCCTACCATCACCATC  
ACGGCATTACTGGGTTCTTGAATAGTGTGTAATCCCTGGATATACATGTTTTTATGGCCATCTCCTTCAAGACTGTGTTCAAAGCTTCCCATGCTGCCAAACATTAA  
GAAAAATTCACAAAGAAGATACTGACAGTATGAGCAGAAGACAGACTTTTTATTCTAACAAATCGAAGCCCAACAAACAGTACGGGTACGTTGAAGGACTCGCCTAAATCT  
AAGTCCATCAAATTCATTCTGTTTCAACTTGA

>saiB01

ATGCGTTTCTCCGCGGTCGCCGACGCGGGGCCCTCGGGCAACTCCAGCCCATGGTGGCCTTGGTACCAGCGTGGCAACACGAGCCGAGGAGCCGAACCCCTCGGAGA  
AGGTAAACGCGCCCGCAAGGAGCTGTGCGCAACGAGGAGCTAGCCAACTGGAGATCGCCGTGCTGGCGGTGACTTTCGCGGTGGCCGTGGGCAACAGCAGCGTGT  
CTGGCGCTGCACCGGACGCGCGCAAGACGTCGCCCATGCACCTTTCATCCGACACCTCAGCCTGGCCGACCTGGCCGTGGCCCTTCTCCAGGTGCTGCCGCAATGT  
CTGGGACATCACCTACCGCTTCCGCGGGCCGACTGGCTGTGCCGGTGGTGAAGCACCTGCAAGTGTGGCATGTTCCGCGTGGCCCTACATGCTGGTAGTATGACAGC  
CGCAGTACTTCTTCCATGATCGAGGTGAACAATGTCAACAGCCCGGACTGCTGGGCCACCTTTCATCCAGCCCTGGGGTCTGCTGGTACGATGACAGTGGATGAC  
GGCGCGCATCTTCTGGCACCTGTGCCATCCTGGTACCTGCTACGGCTTCACTGCTACAACATCTGGCGCAACCTCCGCGGGAAGACGCGCTCGCGCAGAGCAAG  
GTGCAGAGCAAGCGGGTGTGCCCTTCCAAAGGGGTTCTGCTTGCACCCTGTGTCAGCAGCGTGAAGTCCATTTCCCGGGCCAAAGATCCGACCGTGAAGATGACTTT  
TGATGCTGACGGCTTACATGCTGCTGGCGCCCTTCTCATCATCCAGATGGTGTGCTGCTGGATCCCAAGTCCGCTGGACAGAACTCCGAAACCCCTACCATCACCATC  
CACGGCATTACTGGGTTCTTGAATAGTGTGTAATCCCTGGATATACATGTTTTTATGGCCATCTCCTTCAAGACTGTGTTCAAAGCTTCCCATGCTGCCAAACATTAA  
GAAAAATTCACAAAGAAGATACTGACAGTATGAGCAGAAGACAGACTTTTTATTCTAACAAATCGAAGCCCAACAAACAGTACGGGTACGTTGAAGGACTCGCCTAAATCT  
TTCCAAGTCCATCAAATTCATTCTGTTTCAACTTGA

>papAnu2

ATGCGTTTCTCCGCGGTCGCCGACGCGGGGCCCTCGGGCAACTCCAGCTTATGGTGGCCTTGGTACCAGCGTGGCAACACGAGCCGAGGAGCCGAAGCCCTCGGGG  
AAGGCAACGCGCCCGGAGGAGTGTGCGCAACGAGGAGCTGGCCAACTGGAGATCGCCGTGCTGGCGGTGACTTTCAGCGTGGCCGTGGGCAACAGCAGCGTGT  
GCTGGCTTGCACCGGACGCGCGCAAGACGTCGCCCATGCACCTTTCATCCGACACCTCAGCCTGGCCGACCTGGCCGTGGCCCTTCTCCAGGTGCTGCCGCAATGT  
CTGGGACATCACCTACCGCTTCCGCGGGCCGACTGGCTGTGCCGGTGGTGAAGCACCTGCAAGTGTGGCATGTTCCGCGTGGCCCTACATGCTGGTAGTATGACAGC  
CGACCGCTACATCGCGGTGTGCCACCCGCTGAAGACTCTGCAACAGCCCGGACTGCTGGGCCACCTTTCATCCAGCCCTGGGGTCTGCTGGTACGATGACAGTGG  
CGCAGTACTTCTTCCATGATCGAGGTGAACAATGTCAACAGCCCGGACTGCTGGGCCACCTTTCATCCAGCCCTGGGGTCTGCTGGTACGATGACAGTGGATGAC  
GGCGCGCATCTTCTGGCACCTGTGCCATCCTGGTACCTGCTACGGCTTCACTGCTACAACATCTGGCGCAACCTCCGCGGGAAGACGCGCTCGCGCAGAGCAAG  
GTGCAGAGCAAGCGGGTGTGCCCTTCCAAAGGGGTTCTGCTTGCACCCTGTGTCAGCAGCGTGAAGTCCATTTCCCGGGCCAAAGATCCGACCGTGAAGATGACTTT  
TGATGCTGACGGCTTACATGCTGCTGGCGCCCTTCTCATCATCCAGATGGTGTGCTGCTGGATCCCAAGTCCGCTGGACAGAACTCCGAAACCCCTACCATCACCATC  
CACGGCATTACTGGGTTCTTGAATAGTGTGTAATCCCTGGATATACATGTTTTTATGGCCATCTCCTTCAAGACTGTGTTCAAAGCTTCCCATGCTGCCAAACATTAA  
aattcaacaagaagATACTGACAGTATGAGCAGAAGACAGACTTTTTATTCTAACAAATCGAAGCCCAACAAACAGTACGGGTATGTGGAAGGACTCGCCTAAATCTTCCAAGTCC  
ATCAAATTCCTGTTTCAACTTGA

>hg38

ATGCGTCTCTCCGCGGTCGCCGACGCGGGGCCCTCGGGCAACTCCAGCCCATGGTGGCCTTGGTACCAGCGTGGCAACACGAGCCGAGGAGCCGAAGCCCTCGGGG  
AGGGCAACGCGCCCGGAGGAGTGTGCGCAACGAGGAGCTGGCCAACTGGAGATCGCCGTGCTGGCGGTGACTTTCAGCGTGGCCGTGGGCAACAGCAGCGTGT  
GCTGGCTTGCACCGGACGCGCGCAAGACGTCGCCCATGCACCTTTCATCCGACACCTCAGCCTGGCCGACCTGGCCGTGGCCCTTCTCCAGGTGCTGCCGCAATGT  
CTGGGACATCACCTACCGCTTCCGCGGGCCGACTGGCTGTGCCGGTGGTGAAGCACCTGCAAGTGTGGCATGTTCCGCGTGGCCCTACATGCTGGTAGTATGACAGC  
CGACCGCTACATCGCGGTGTGCCACCCGCTCAAGACTCTGCAACAGCCCGGCGCCGCTCGCGCTCATGATCGCGCCGCTGGGTGCTGAGCTTCTGCTGAGCACGC  
CGCAGTACTTCTGCTTCTCCATGATCGAGGTGAACAATGTCAACAGCCCGGACTGCTGGGCCACCTTTCATCCAGCCCTGGGGTCTGCTGGTACGATGACAGTGG  
GGCGCGCATCTTCTGGCGCCCGTGTGCTTGGTACCTGCTACGGCTTCACTGCTACAACATCTGGTGGCAACCTTGGTGGCAACGCTCCGCGGGAAGACGCGCTCCGCGCAGAG  
GTGCAGAGCAAGCGGGTGTGGCCTTCCAAAGGGGTTCTGCTGCGCACCTGTGTCAGCAGCGTGAAGTCCATTTCCCGGGCCAAAGATCCGACCGTGAAGATGACTTT  
TGATGCTGACGGCTTACATGCTGCTGGCGCCCTTCTCATCATCCAGATGGTGTGCTGCTGGATCCCAAGTCCGCTGGACAGAACTCCGAAACCCCTACCATCACCATC  
CACGGCATTACTGGGTTCTTGAATAGTGTGTAATCCCTGGATATACATGTTTTTATGGCCATCTCCTTCAAGACTGTGTTCAAAGCTTCCCATGCTGCCAAACATTAA  
CAAGTCCATCAAATTCATTCTGTTTCAACTTGA

>macFas5

ATGCGTTTCTCCGCGGTCGCCGACGCGGGGCCCTCGGGCAACTCCAGCTTATGGTGGCCTTGGTACCAGCGTGGCAACACGAGCCGAGGAGCCGAAGCCCTCGGGG  
AAGGCAACGCGTCGCCGAGGAGCTGCGCAACGAGGAGCTGGCCAAAGTGGAGATCGCCGTGCTGGCGGTGACTTTCAGCGTGGCCGTACTGGCAACAGCAGCGTGT  
GCTGGCTTGCACCGGACGCGCGCAAGACGTCGCCCATGCACCTTTCATCCGACACCTCAGCCTGGCCGACCTGGCCGTGGCCCTTCTCCAGGTGCTGCCGCAATGT  
GCTGGGACATCACCTACCGCTTCCGCGGGCCGACTGGCTGTGCCGGTGGTGAAGCACCTGCAAGTGTGGCATGTTCCGCGTGGCCCTACATGCTGGTAGTATGACAGC  
CGCAGCTACATCGCGGTGTGCCACCCGCTGAAGACTCTGCAACAGCCCGGCGCCGCTCGCGCTCATGATCGCGCCGCTGGGTGCTGAGCTTCTGCTGAGCACGC  
CGCAGTACTTCTGCTTCTCCATGATCGAGGTGAACAATGTCAACAGCCCGGACTGCTGGGCCACCTTTCATCCAGCCCTGGGGTCTGCTGGTACGATGACAGTGG  
GGCGCGCATCTTCTGGCGCCCGTGTGCTTGGTACCTGCTACGGCTTCACTGCTACAACATCTGGTGGCAACCTTGGTGGCAACGCTCCGCGGGAAGACGCGCTCCGCGCAGAG  
GTGCAGAGCAAGCGGGTGTGGCCTTCCAAAGGGGTTCTGCTGCGCACCTGTGTCAGCAGCGTGAAGTCCATTTCCCGGGCCAAAGATCCGACCGTGAAGATGACTTT  
TGATGCTGACGGCTTACATGCTGCTGGCGCCCTTCTCATCATCCAGATGGTGTGCTGCTGGATCCCAAGTCCGCTGGACAGAACTCCGAAACCCCTACCATCACCATC  
ACTGCATTACTGGGTTCTTGAATAGTGTGTAATCCCTGGATATACATGTTTTTATGGCCATCTCCTTCAAGACTGTGTTCAAAGCTTCCCATGCTGCCAAACATTAA  
GAAAAATTCACAAAGAAGATACTGACAGTATGAGCAGAAGACAGACTTTTTATTCTAACAAATCGAAGCCCAACAAACAGTACGGGTATGTGGAAGGACTCGCCTAAATCTT  
CAAGTCCATCAAATTCATTCTGTTTCAACTTGA

GTGATCGTGACGGCTTACATCGTCTGCTGGGCGCCTTTCTTCATCATCCAGATGTGGTCTGTCTGGGATCCCAAGTCCGCTGGACCGAATCGGAAACCCTACCATCACA  
TCACGGCATTACTGGGCTTGAATAGTCTGTAACTCCCTGGATATACATGTTTTAGTGGGCTTCCCTTCAAGACTGTGTTCAAAGCTTCCCATGCTGCCAAACATTA  
AGGAAAAATTCACAAAGAAGATACTGACAGTATGAGCAGAAGACAGACTTTTTATTCTAACAAATCGAAGCCCAACAACAGTACGGGTATGTGGAAGGACTCGCCTAAATCT  
TCCAAGTCCATCAAATTCCTTCTCTGTTCAACTTGA

>nomLeu3

ATGCGCTCTCCGCGCGTCCCAGCGGGGGCCTTCGGGCAACTCCAGCCATGGTGGCCTCTGGCCACCGGCGCTGGCAACACGAGCCGGGAGGCCGAACCCTCGGGG  
AAGCAATGGCCCGCGAGGGAGTGCACACGAGGACTGGCCAACTGAGATCGCCGTGCTGGCGGTGACTTTCGCGGTGGCCGCTGCTGGCCGCAACAGCAGCGTACT  
GCTGGCTCTGCACCGGACGCGCGCAAGAGCTCCCGCATGCACCTTTCATCCGACACCTCAGCCTGGCCGACTTTGGCCGTGGCATTCTCCAGGTGCTGCCCAAATGTG  
CTGGGACATCACTACCGCTTCCGCGGCCCGGACTGGCTGTGCCCGGTGGTGAAGCACTGCAGGTGTTCCGGCATGTTCCGCGTGGGCTACATGCTGGTGTATGACAGC  
CGACCGCTACATCGCGGTGTGCCACCCGCTCAGACTTCTGCCACAGACCGCGCGCCGCTCGCCCTCATGATCGCGCGCGCTGGGTGCTGAGCTTCTGCTGAGCAGC  
CGCAGTACTTCTCTTCCATGATCGAGGTGAACAATGTCCACCAAGGCCCGGCGACTGCTGGGCCACCTTTCATCCAGCCCTGGGTTCTCGTGCCTACGTGACGTGGATGA  
CGGGTGGCATCTTCGTGGCGCCGTTGGTTCATCTGGGTACCTGCTACGGTTCATCTGCTACAACATCTGGCGCAACGTCGCGTGGGAAGACGGCGTCCGCGCAGAGCAAG  
GGCGCAGAGCAAGCGGGTGGCCCTTTCAGAAGGGTTCCTGCTCGTCCCTGTGTCAGCAGCGTGAAGTCCATTTCTCGGGCAAGATCCGACCGTGAAGATGACTTTT  
GTGATAGTGACGGCTTACATCGTCTGCTGGGCGCCTTTCTTCATCATCCAAATGTGGTCTGTCTGGGATCCCAAGTCCGCTGGACCGAATCGGAAACCCTACTATCACCAT  
CACTGCATTACTGGTCCCTTGAATAGCTGCTGTAATCCCTGGATATACATGTTTTAGTGGCCATCTCCTTCAAAGCTGTGTTCAAAGCTTCCGCTGCCAAACATGAA  
GGAAAAATTCACAAAGAAGATACTGACAGTATGAGCAGAAGACAGACTTTTTATTCTAACAAATCGAAGCCCAACAACAGTACGGGTATGTGGAAGGACTCGCCTAAATCT  
CCAAGTCCATCAAATTCCTGTTTCAACTTGA

>ponAbe2

ATGCGCTCTCCGCGCGTCCCAGCGGGGGCCTTCGGGCAACTCCAGCCATGGTGGCCTCTGGCCACCGGCGCTGGCAACACGAGCCGGGAGGCCGAAGCCCTCGGGG  
AAGGCAACGCGCCCGCGAGGGAGTGCACACGAGGAACTGGCCAACTGAGATCGCCGTGCTGGCGGTGACTTTCGCGGTGGCCGCTACTGGCAACAGCAGCGTACT  
GCTGGCTCTGCACCGGACGCGCGCAAGAGCTCCCGCATGCACCTTTCATCCGACACCTCAGCCTGGCCGACTTTGGCCGTGGCATTCTCCAGGTGCTGCCCAAATGTG  
CTGGGACATCACTACCGCTTCCGCGGCCCGGACTGGCTGTGCCCGGTGGTGAAGCACTGCAGGTGTTCCGGCATGTTCCGCGTGGGCTACATGCTGGTGTATGACAGC  
CGACCGCTACATCGCGGTGTGCCACCCGCTTAAAGACTCTGCAACAGCCCGCGCGCCGCTCGCCCTCATGATCGCGGCTGCTGGGTGCTGAGCTTCTGCTAAGCAGC  
CGCAGTACTTCTCTTCCATGATCGAAGTGAACAATGTCCACCAAGGCCCGGCGACTGCTGGGCCACCTTTCATCCAGCCCTGGGTTCTCGTGCCTACGTGACCTGGATGAC  
GGCGCGCATCTTCGTGGCGCCGTTGGTTCATCTGGGTACCTGCTACGGTTCATCTGCTACAACATCTGGCGCAACGTCGCGCGGAAGACGGCGTCCGCGCAGAGCAAG  
GTGACAGCAAGCGGGTGGCGCCTTCCAAAAAGGGTTCCTGCTCGCAGCCCTGTGTCAGCAGCGTGAAGTCCATTTCCGCGGCAAGATCCGACCGTGAAGATGACTTTT  
TGATCGTGAACGGCTTACCTGCTGCTGGGCGCCTTCTTCATCATCCAGATGTGGTGTCTGGATCCCAAGTCCGCTGGACCGAATCGGAAACCCTACTATCACCAT  
CACTGCATTACTGGTTCCTTGAATAGCTGCTGTAATCCCTGGATATACATGTTTTAGTGGCCATCTCCTTCAAAGCTGTGTTCAAAGCTTCCCATGCTGCCAAACATGAA  
GGAAACATTCACAAAGAAGATACTGACAGTGTGAGCAGAAGACAGACTTTTTATTCTAACAAATCGAAGCCCAACAACAGTACGGGTATGTGGAAGGACTCGCCTAAATCT  
CCAAGTCCATCAAATTCCTGTTTCAACTTGA

>heMac3

ATGCGTTTCTCGCGCGTCCCAGCGGGGGCCTTCGGGCAACTCCAGCTTATGGTGGCCTCTGGCCACAGCGCTGGCAACACGAGCCGGGAGGCCGAAGCCCTCGGGG  
AAGGCAACGCTCCGCGGAGGAGCTGCACACGAGGAGCTGGCCAACTGAGATCGCCGTGCTGGCGGTGACTTTCAGGTGGCCGCTACTGGCAACAGCAGCGTACT  
GCTGGCTCTGCACCGGACGCGCGCAAGAGCTCCCGCATGCACCTTTCATCCGACACCTCAGCCTGGCCGACTGGCCGTGGCCTTCTCCAGGTGCTGCCCAAATGTG  
CTGGGACATCACTACCGCTTCCGCGGCCCGGACTGGCTGTGCCCGGTGGTGAAGCACTGCAGGTGTTCCGGCATGTTCCGCGTGGGCTACATGCTGGTGTATGACAGC  
CGACCGCTACATCGCGGTGTGCCACCCGCTTAAAGACTCTGCAACAGCCCGCGCGCCGCTCGCCCTCATGATCGCGGCTGCTGGGTGCTGAGCTTCTGCTAAGCAGC  
CGCAGTACTTCTCTTCCATGATCGAAGTGAACAATGTCCACCAAGGCCCGGCGACTGCTGGGCCACCTTTCATCCAGCCCTGGGTTCTCGTGCCTACGTGACCTGGATGAC  
GGCGCGCATCTTCGTGGCGCCGTTGGTTCATCTGGGTACCTGCTACGGTTCATCTGCTACAACATCTGGCGCAACGTCGCGCGGAAGACGGCGTCCGCGCAGAGCAAG  
GTGACAGCAAGCGGGTGGCGCCTTCCAAAAAGGGTTCCTGCTGCACCCCTGTGTCAGCAGCGTGAAGTCCATTTCCGCGGCAAGATCCGACCGTGAAGATGACTTTT  
GTGATCGTGACCGCTTACATCGTCTGCTGGGCGCCTTCTTCATCATCCAGATGTGGTGTCTGCTGGGATCCCAAGTCCGCTGGACCGAATCGGAAACCCTACTATCACCAT  
TCACGGCATTACTGGTTCCTTGAATAGCTGCTGTAATCCCTGGATATACATGTTTTAGTGGCCATCTCCTTCAAAGCTGTGTTCAAAGCTTCCCATGCTGCCAAACATTA  
AGGAAAAATTCACAAAGAAGATACTGACAGTGTGAGCAGAAGACAGACTTTTTATTCTAACAAATCGAAGCCCAACAACAGTACGGGTATGTGGAAGGACTCGCCTAAATCT  
TCCAAGTCCATCAAATTCCTTCTGTTTCAACTTGA

BST-2

>panPan1

ATGGCATCTACTTTGTATGACTATTGCAGAGTGCCTATGGAAGATGGGGATAAGCGTGTAAAGCTTCTGCTGGGATAGGAATTCTGGTCTTCTGATCATCGTATTCTGGG  
GGTGCCCTTGATTATCTTACCATCAAGGCCAACAGCGAGGCGCTGCCGGGACGGCTCCGGGCACTGATGGAGTGTGCAATGTCAACCATCTCTGCAACAAGAGCTGAC  
CGAGGCCAGAGAGGGCTTTCAGAAATGTGAGGCGCCAGGCCCGCCACTGCAACACACCTGTGATGGCCCTAATGGCTTCCCTGGATGCAGAGAAGGCCCAAGGACAAAAA  
AAGTGGAGGAGTGTgaggAAGAGATCACTACATTTAAACCATAAAGCTTCAGGACCGCTTGCAGAGGTGGAGGCACTGAGAAGGAAACACAGCTTAAAGCGTGAGAAATCG  
GGCAAAAGATCTACCCAGCTCCAGGACTCCAGCTCCGCTGCGGGCGCCAGCTCCTGATTGTGCTGCTGGGCTCAGCGCTCTGCTGCAGTGA

>hiRox1

ATGGCACCTATTTGTATGACTATTGCAAAATGCCATGGAAGACGGGGACAAGCGTGTAAAGCT-----  
GGTGGTAGGAAATTCGGGGCTCCTGGTCAATGATGATTCGGGGGTGCTCCTGATTTTCTTCATCATCAAGGCCAACAGCGAGGCGCTGCCAGGATGGCCTCCGGGCACTGAT  
GGAAGTGCACATGTCACCTATCTCCTGCAAGAAGAGCTGACCCAGGCCACGCGGGGCTTTCGGGATGCAGAGGCCAGGCTGTCACTGCAACACAGACTGTGATGGCCC  
TAATGGCTTCCCTGGATGCAGAGAAGGCCCAAGGACGAAAGAAAGTGGAGGAGCTTGAGGGAGAGATCACTACATTGAACCAAGCTTCCAGGACCGCTTCCGCGAGGTGG  
AGCGACTGAGAAGAGAAAACACGCTTAAAGCGTGAGAAATCGCGGACACGGA--  
CTCCGCCAGCTCCAGAACTCCAGCTGCGCGGAGAGCCCGGCTCCTGATTCTGCTGCTGGGCTTGGGCGCTCTGCTGCTGTGA

>gorGor3

ATGGCATCTACTTTGTATGACTATTGCAGAGTGCCTATGGAAGACGGGGATAAGCGTGTAAAGCTTCTGCTGGGATAGGAATTCTGGTCTTCTGATCATCGTATTCTGG  
GGTGCCCTTGATTATCTTACCATCAAGGCCAACAGCGAGGCGCTGCCGGGACGGCTCCGGGCACTGATGGAGTGTGCAATGTCAACCATCTCTGCAACAAGAGCTGAC  
CCGAGGCCAGAAAGGGCTTTCAGGATGTGAGGCGCCAGGCCCGCCACTGCAACACACCTGTGATGGCCCTAATGGCTTCCCTGGATGCAGAGAAGGCCCAAGGACAAAAA  
AAAGTGGAGGAGCTTGGAGGAGAGTCACTACATTAACCATAAGCTTCCAGGACCGCTTCCGAGGTGGAGCGACTGAGAAGAGAAAACAGGCTTAAAGCGTGAGAATC  
GCAGACAGGAAGTACTACCCAGCTCCAGGACTCCAGCTCCGCTGCGCGCGCCAGCTCCTGTTGTGCTGCTGGGCTCAGCGCTCTGCTGCAGTGA

>panTro4

ATGGCATCTACTTTGTATGACTATTGCAGAGTGCCTATGGAAGATGGGGATAAGCGTGTAAAGCTTCTGCTGGGATAGGAATTCTGATGCTTCTGATCATCGTATTCTGGG  
GGTGCCCTTGATTATCTTACCATCAAGGCCAACAGCGAGGCGCTGCCGGGACGGCTCCGGGCACTGATGGAGTGTGCAATGTCAACCATCTCTGCAACAAGAGCTGAC  
CGAGGCCAGAAAGGGCTTTCAGGATGTGAGGCGCCAGGCCCGCCACTGCAACACACCTGTGATGGCCCTAATGGCTTCCCTGGATGCAGAGAAGGCCCAAGGACAAAAA  
AAGTGGAGGAGCTTGAAGAAAGAGTCACTACATTAACCATAAAGCTTCCAGGACCGCTTCCGAGAGTGGAGCGACTGAGAAGAGAAAACAGGCTTAAAGCGTGAGAATC  
CGGCAAGAAAGTACTACCCAGCTCCAGCTCCGCTGCGCGCGCCAGCTCCTGATGCTGCTGGGCTCAGCGCTCTGCTGCAGTGA

>calJac3

ATGGCACCTACTTTGTTTCACTATTCCCTAGTGCCATGGATGAGAGCAAGGAGCGTGTAAAGCTTCCAGTGGGACAGGAGTTGTGGTCTCCTGGTCAATGAGCTGGA  
GGTGCTCCTGATTGTCTATGTCAAAAAGGCCAACAGCGAGGCGTCCCAAGAGGGCCACCGGGCAGTGTGAGGTGTGCAATGTCAACCATCTCTGGAACAAGAGCTGA  
CCCGGCCCAAGGATGGCTTCCGGGATGCTGAGGCGCCAGATCGCCACCTACAACAGACTGTGATGACCTTAAATGGCTTCCCTGGATGAGGAGGAGGCTACTTCCCAgaga  
gtggagagcttggaggAGAGATCAACCATTTGAACCAGAAAGCTTCCAGGACCGCTTATGAGAGTGGAGCGACTGAGGAGGAAACAGGCTTAAAGCGTGAGAATCG  
AGAAGAACTCCGCCAGCTCCTGGACACAGCTCCGCGCGCGCCCTCTGCTCCTGATTCTGCTGCTGGGCTCAGCGCTCGGCTCCTCTGA

>nasLar1

ATGGCACCTATTTGTATGACTATTGCAAAATGCCATGGAAGACGGGGACAAGCTGTAAAGCT-----  
GGTGGTAGGAAATTCGGGGCTCCTGGTCAATGATGATTCGGGGGTGCTCCTGATTTTCTTCATCATCAAGGCCAACAGCGAGGCGCTGCCAGGATGGCCTCCGGGCACTGAT  
GGAAGTGCACATGTCACCTATCTCCTGCAAGAAGAGCTGACCCAGGCCACGCGGGGCTTTCGGGATGCAGAGGCCAGGCTGTCACTGCAACACAGACTGTGATGGCCC  
TAATGGCTTCCCTGGATGCAGAGAAGGCCCAAGGACGAAAGAAAGTGGAGGAGCTTGAGGGAGAGATCACTACATTGAACCAAGCTTCCAGGACCGCTTCCGCGAGGTGG  
AGCGACTGAGAAGAGAAAACACGCTTAAAGCGTGAGAAATCGCGGACACGGA--  
CTCCGCCAGCTCCAGAACTCCAGCTGCGCGGAgagagccttgcctgattctgctggttggcgctctgctgctgtga

>chiSab2

ATGGCACCTATTTGTATGACTATTGCAAAATGCCATGGAAGACGGGGACAAGTGTAAAGCT-----  
GGCCGTAGGAAATTCGGGGCTCCTGCTCATGTGCTTGGGGGTGCCCTTCCATTTCTTCATCATCAAGGCCAACAGCGAGGCGCTGCCAGGATGGCCTCCGGGCACTGAT  
GGAGTGTGCAATGTCACCTATCTCCTGCAACAAGAGCTGCGCGAGGCCACGCGGGGCTTTCGGGATGCAGAGGCCAGGCTGTCACTGCAACACAGACTGTGATGGCCC  
TAATGGCTTCCCTGGATGCAGAGAAGGCCCAAGGACGAAAGAAAGTGGAGGAGCTTGGAGGAGAGATCACTACATTGAACCAAGCTTCCAGGACCGCTTCCGCGAGGTGGG  
TAATGGCTTCCCTGGATGCAGAGAAGGCCCAAGGACGAAAGAAAGTGGAGGAGCTTgaggGGGAGATCACTACATTGAACCAAGCTTCCAGGACCGCTTCCGCGAGGTGGG

GCGACTGAGAAGAGAAAACAGGCTTAAACGTGAGAATCGCGGACACGAA--  
CTCCGCCAGCTCCAGGACTCCAGCTGCGCGGAGAGCCCCgctgctgattctgctgctggctgctgctgTGA  
> saiBo1  
ATGGCACCCACTTTGTTTCACTATCCCTAGTGCCCATAGATGAGAGGAAGGAGCGCTATAAGCTTCTAGTGGGGATAGGAGTTGTGGTGTCTCTGGTCATAGTGGTTCTGG  
GGACGCTCCTGATCATCTGACGTAAAAGGGCCAAACAGCGAGGACTGCCAGGAGGGCCACCGGGCAGTGATGGAGTGTGCAAAATGCCACCCATCTCCTGGAACAAAAGCTGA  
CCTGGGCCAGGACGGCTTCCGGGATGCTGAGGCCAGGTCGCCACCTACAACCCAGACTGTGATGACCCCTAATGGCTTCCCTGGATGAAGGAGAAAGGGCGCATAGCCagaagaa  
agtggaggagcttgaggGAGAGATCACTACATTGAACCAAGCTTCAGGATGCTCTATGGAGTTGAGCGACTGAGGAGAAAACCCAGACTTAAGCGGCAAAAATCGCGGACC  
AGAAGGACTCCGCCAGCTCCCTGGACACAGCTCGCGGGCGAAGCTCTGCTCTGATTCCGCTGCTGGGCTCGCGCTCGGCTCTCTGA  
> papAnu2  
ATGGCACCTATTTTTGTATGACTATTGCAAAATGTCTATGGAAGACGGGGACAAGCGCTGTAACCT-----  
GGTGGTAGGAATTTCTGGGGCTCCTGGTCAATAGTGTCTTGGGGGTGCCCTGATTTTCTTCATCATCAAGGCCAACAGCGAGGCTGCCAGGATGGCTCCGGGCAGTGAT  
GGAGTGTGCAATGTCCCTATCTCCTGCAACAAGAGCTGGCCGAGGCCAGCGGGGCTTTCGGGATGCAAGGCCAGGCTGTCACCTGCAACAGACTGTGATGGGCC  
TAATGGCTTCCCTGGATGACGAGAAGGCCAAAGGACGAAAGAAAGTGGAGGAGCTTGAGGGGAGATCACTACATTGAACCACAAGCTTCAGGACGCTGCTCGGGAGGTG  
GAGCGACTGAGAAGAAAACCCAGCTTAAACGCGAGAATCGCGGACACGGA--  
CTCCGCCAGCTCCCAAGACTCCAGCTGCGCGGAGAGCCCCGCTCCTGATTCTGCTGCTGGGCTTGGGCGCTGCTGCTGTGA  
> hg38  
ATGGCATCTACTTGTATGACTATTGCAAGAGTGCCTATGGAAGACGGGGATAAGCGCTGTAAGCTTCTGCTGGGGATAGGAATTTCTGGTGTCTGATCATCGTATTCTGG  
GGGTGCCCTTGATTATCTTACCATCAAGGCCAACAGCGAGGCTGCCGGGACGGCTTCCGGGAGTGATGGAGTGTGCAATGTCCACCTATCTCCTGCAACAAGAGCTGA  
CCGAGGCCAGAAAGGGCTTTCAGGATGTTGGAGGCCAGGCCGCCACCTGCAACCCAGCTGTGATGGCCCTAATGGCTTCCCTGGATGCAgagaagggcccaaggcaaaaagaaatgg  
aggagcttgaggGAGAGATCACTACATTAAACCAATAGCTTCAGGACGCTGCAAGGAGGCTGACGAGGTTGAGCGACTGAGAAGAGAAAACCCAGGCTTAAAGCGTGAATCGCGGACAAGAA  
GTACTACCCAGCTCCAGGACTCCAGCTCCGCTGCGCGGCCAGCTGCTGATTGTGCTGCTGGGCTCAGCGCTGCTGCTGCACTGA  
> macFas5  
ATGGCACCTATTTTTGTATGACTATTGCAAAATGCCATGGAAGACGGGGACAAGCGCTGTAACCT-----  
GGTGGTAGGAATTTCTGGGGCTCCTGGTCAATAGTGTCTTGGGGGTGCTCCTGATTTTCTTCATCATCAAGGCCAACAGCGAGGCTGCCAGGATGGCTCCGGGCAGTGAT  
GGAGTGTGCAATGTCCCTATCTCCTGCAACAAGAGCTGGCCGAGGCCAGCGGGGCTTTCGGGATGCAAGGCCAGGCTGTCACCTGCAACAGACTGTGATGGGCC  
TAATGGCTTCCCTGGATGACGAGAAGGCCAAAGGACGAAAGAAAGTGGAGGAGCTTgaggGGGAGATCACTACATTGAACCACAAGCTTCAGGACGCTGCTCGGGAGGTGGA  
GCGACTGAGAAGAAAACCCAGCTTAAACGCGAGAATCGCGGACACGGA--  
CTCCGCCAGCTCCCAAGACTCCAGCTGCGCGGCAAGCCCCGCTCCTGATTCTGCTGCTGGGCTTGGGCGCTGCTGCTGTGA  
> nomLeu3  
ATGGCACCTACTTTGTATGACTATTGCAAGAGTGCCTATGGAAGACGGGGATAAGCGCTGTAAGCTTCTGCTGGGGATAGGAATTTCTGGTGTCTGATCATAGTGGTCTGG  
GGGTGCCCTGATTATCTTACCATCAAGGCCAACAGCGAGGCTGCCGGGACGGCTTCCGGGAGTGATGGAGTGTGCAATGTCCACCTATCTC-----  
ACCGAGGCCAGAAAGGGCTTTCAGGATGTTGGAGGCCAGGCCGCCACCTGCAACCCAGCTGTGATGGCCCTAATGGCTTCCCTGGATGACGAGAAGGCCCAAGGACAAAA  
GAAAGTGGAGGAGCTtgaggGAGAGATCACTACATTGAACCACAAGCTTCAGGACGCTGCTCGGAGGTGGAGCGACTGAG-----  
GACTCCAGCTCCCGCGGCCACCCAGCT-CTGATC-TGCTGCTGGGCTCAGCGCTGCTGCTG---TGA  
> ponAbe2  
ATGGCATCTACTTTGTATGACTATTGCAAGAGTGCCTATGGAAGAGTGGGGATAAGCGCTGTAAGCTTCTGCTGGGGATAGGAATTTTGGTGTCTGATCACAGTATTCTGG  
GGGTGCCCTTGATTATCTTACCATCAAGGCCAACAGCGAGGCTGCCGGGACGGCTTCCGGGAGTGATGGAGTGTGCAATGTCCACCTATCTCCTGCAACAAGAGCTGA  
CTGAGGCCAGAAAGGGCTTTCAGGATACGGAGGCCAGGTCACCACCTGCAACCCAGACTGTGATGGCCCTAATGGCTTCCCTGGATGACGAGAAGGCCCAAGGACAAAAA  
AAGTGGAGGAGCTTGAGGAGAGATCACTATATTGAACCAATAGCTTCAGGACGCTGCTCGGAGGTGGAGCGACTGAGAAG-----  
GACTCCAGCTCCCGCGGCCACCCAGCT-CTGATC-TGCTGCTGGGCTCAGCGCTGCTGCTG---TGA  
> rheMac3  
ATGGCACCTATTTTTGTATGACTATCGCAAAATGCCATGGAAGACGGGGACAAGCGCTGTAACCT-----  
GGTGGTAGGAATTTCTGGGGCTCCTGGTCAATAGTGTCTTGGGGGTGCTGCTGATTTTCTTCATCATCAAGGCCAACAGCGAGGCTGCCAGGATGGCTCCGGGCAGTGAT  
GGAGTGTGCAATGTCCCTATCTCCTGCAACAAGAGCTGGCCGAGGCCAGCGGGGCTTTCGGGATGCAAGGCCAGGCTGTCACCTGCAACAGACTGTGATGGGCC  
TAATGGCTTCCCTGGATGACGAGAAGGCCAAAGGACGAAAGAAAGTGGAGGAGCTTgaggGGGAGATCACTACATTGAACCACAAGCTTCAGGACGCTGCTCGGGAGGTG  
GAGCGACTGAGAAGAAAACCCAGCTTAAACGCGAGAATCGCGGACACGGA--  
CTCCGCCAGCTCCCAAGACTCCAGCTGCGCGGAGAGCCCCGCTCCTGATTCTGCTGCTGGGCTTGGGCGCTGCTGCTGTGA  
FITM2  
> panPan1  
ATGGAGCATCTGGAGCGCTGCGAGTGGTTGTTGCGGGGGACGCTGGTGGCGGGCGCGCTGCGGCGCTACCTGCCCTGGGCCCTGGTGGCCTCCATGCTGGCGGGCTCCC  
TCCTCAAGGAGTTGTCGCCGTTGCCGAGAGCTACCTCAGCAACAAGCGCAACGTCCTCAACGTGATTTTGTCAAAGTGGCCTGGGCTGGACGTTCTGCTCCTCCTGCC  
TTTCATTGCCCTACCAACTACCATCTGACCGCAAGGCTGGCTTGGTCTGCGCGGCTGAGCACCTGCTTGTGGGCACGGCCATCTGGTACATCTGCACCTCCATCTTC  
TCCAACCTGCAACACTACACGGGACGCTGCTACCAGTCCCGGCCCTGGAGGGGGTCAAGAAAGAACACCCAGAGCAAGCAGCAGTGCACCCAGGAAGGGGGCTTTTGGCA  
TGGCTTTGACATCTCAGGTCACTCCTTCTGCTGACCTTCTGCGCCCTCATGATTGTTAGAAGAGATGCTGTGCTGCATGAGGTGAAGACGGACCGAAGCCACTGCCTCCAC  
ACCGCCATCACCACCTGGTTGTGGCCCTGGGCATTCTGACTTTTCATCTGGGTGTTGATGTTTCTGTGCACAGCTGTTATTTCCACAACCTTGTCCAGAAAGGTTTGGCAC  
CTTGTGGTTGCTGAGCTGGTACGGGACATACGGGTTTTGGTATCCGAAAGCCTTTTCCCGAGACTTCTCCCGAGCTGTAGTTGAAATTTGAAGCAAGATAGttacaag  
aaataa  
> rhiFox1  
ATGGAGCATCTGGAGCGCTGCGAGTGGTTGCTGCGGGGGACGCTGGTGGCGGGCGCGTGGTGGCGGCTACCTGCCCTGGGCCCTGGTGGCCTCCATGCTGGCGGGCTCCC  
TCCTCAAGGAGTTGTCGCCGTTGCCGAGAGCTACCTCAGCAACAAGCGCAACGTCCTCAACGTGATTTTGTCAAAGTGGCCTGGGCTGGACGTTCTGCTCCTCCTGCC  
TTTCATTGCCCTACCAACTACCATCTGACCGCAAGGCTGGCTTGGTCTGCGCGGCTGAGCACCTGCTTGTGGGCACGGCCATCTGGTACATCTGCACCTCCATCTTC  
TCCAACCTGCAACACTACACGGGACGCTGCTACCAGTCCCGGCCCTGGAGGGGGTCAAGAAAGAACACCCAGAGCAAGCAGCAGTGCACCCAGGAAGGGGGCTTTTGGCA  
TGGCTTTGACATCTCAGGTCACTCCTTCTGCTGACCTTCTGCGCCCTCATGATTGTTAGAAGAGATGCTGTGCTGCATGAGGTGAAGACGGACCGAAGCCACTGCCTCCAC  
ACCGCCATCACCACCTGGTTGTGGCCCTGGGCATTCTGACTTTTCATCTGGGTGTTGATGTTTCTGTGCACAGCTGTTATTTCCACAACCTTGTCCAGAAAGGTTTGGCAC  
CTTGTGGTTGCTGAGCTGGTACGGGACATACGGGTTTTGGTATCCGAAAGCCTTTTCCCGAGACTTCTCCCGAGCTGTAGTTGAAATTTGAAGCAAGATAGTTACA  
AGAAATAA  
> gorGor3  
ATGGAGCATCTGGAGCGCTGCGAGTGGTTGTTGCGGGGGACGCTGGTGGCGGGCGCGTGGTGGCGGCTACCTGCCCTGGGCCCTGGTGGCCTCCATGCTGGCGGGCTCCC  
TCCTCAAGGAGTTGTCGCCGTTGCCGAGAGCTACCTCAGCAACAAGCGCAACGTCCTCAACGTGATTTTGTCAAAGTGGCCTGGGCTGGACGTTCTGCTCCTCCTGCC  
TTTCATTGCCCTACCAACTACCATCTGACCGCAAGGCTGGCTTGGTCTGCGGGCGCTGAGCACCTGCTTGTGGGCACGGCCATCTGGTACATCTGCACCTCCATCTTC  
TCCAACCTGCAACACTACACGGGACGCTGCTACCAGTCCCGGCCCTGGAGGGGGTCAAGAAAGAACACCCAGAGCAAGCAGCAGTGCACCCAGGAAGGGGGCTTTTGGCA  
TGGCTTTGACATCTCAGGTCACTCCTTCTGCTGACCTTCTGCGCCCTCATGATTGTTAGAAGAGATGCTGTGCTGCATGAGGTGAAGACGGACCGAAGCCACTGCCTCCAC  
ACCGCCATCACCACCTGGTTGTGGCCCTGGGCATTCTGACTTTTCATCTGGGTGTTGATGTTTCTGTGCACAGCTGTTATTTCCACAACCTTGTCCAGAAAGGTTTGGCAC  
CTTGTGGTTGCTGAGCTGGTACGGGACATACAGGTTTTGGTATCCGAAAGCCTTTTCCCGAGACTTCTCCCGAGCTGTAGTTGAAATTTGAAGCAAGATAGTTACA  
AGAAATAA  
> panTro4  
ATGGAGCATCTGGAGCGCTGCGAGTGGTTGTTGCGGGGGACGCTGGTGGCGGGCGCGTGGTGGCGGCTACCTGCCCTGGGCCCTGGTGGCCTCCATGCTGGCGGGCTCCC  
TCCTCAAGGAGTTGTCGCCGTTGCCGAGAGCTACCTCAGCAACAAGCGCAACGTCCTCAACGTGATTTTGTCAAAGTGGCCTGGGCTGGACGTTCTGCTCCTCCTGCC  
TTTCATTGCCCTACCAACTACCATCTGACCGCAAGGCTGGCTTGGTCTGCGGGCGCTGAGCACCTGCTTGTGGGCACGGCCATCTGGTACATCTGCACCTCCATCTTC  
TCCAACCTGCAACACTACACGGGACGCTGCTACCAGTCCCGGCCCTGGAGGGGGTCAAGAAAGAACACCCAGAGCAAGCAGCAGTGCACCCAGGAAGGGGGCTTTTGGCA  
TGGCTTTGACATCTCAGGTCACTCCTTCTGCTGACCTTCTGCGCCCTCATGATTGTTAGAAGAGATGCTGTGCTGCATGAGGTGAAGACGGACCGAAGCCACTGCCTCCAC  
ACCGCCATCACCACCTGGTTGTGGCCCTGGGCATTCTGACTTTTCATCTGGGTGTTGATGTTTCTGTGCACAGCTGTTATTTCCACAACCTTGTCCAGAAAGGTTTGGCAC  
CTTGTGGTTGCTGAGCTGGTACGGGACATACAGGTTTTGGTATCCGAAAGCCTTTTCCCGAGACTTCTCCCGAGCTGTAGTTGAAATTTGAAGCAAGATAGTTACA  
AGAAATAA  
> calJac3  
ATGGAGCATCTGGAGCGCTGCGCATGGTTCTCCTCGGGGGACGCTAGTGGCGGGCGCGTGGTGGCGGCTATCTGCCCTGGGCGCTGGTGGCCTCCATGCTGGCGGGCTCCC  
TCCTCAAGGAGTTGTCGCCGTTGCCGAGAGCTACCTCAGCAACAAGCGCAACGTCCTCAACGTGATTTTGTCAAAGTGGCCTGGGCTGGACGTTCTGCTCCTCCTGCC  
TTTCATTGCCCTACCAACTACCATCTGACCGCAAGGCTGGCTTGGTCTGCGGGCGCTGAGCACCTGCTTGTGGGCACGGCCATCTGGTACATCTGCACCTCCATCTTC  
TCCAACCTGCAACACTACACGGGACGCTGCTACCAGTCCCGGCCCTGGAGGGGGTCAAGAAAGAACACCCAGAGCAAGCAGCAGTGCACCCAGGAAGGGGGCTTTTGGCA  
TGGCTTTGACATCTCAGGTCACTCCTTCTGCTGACCTTCTGCGCCCTCATGATTGTTAGAAGAGATGCTGTGCTGCATGAGGTGAAGACGGACCGAAGCCACTGCCTCCAC  
ACCGCCATCACCACCTGGTTGTGGCCCTGGGCATTCTGACTTTTCATCTGGGTGTTGATGTTTCTGTGCACAGCTGTTATTTCCACAACCTTGTCCAGAAAGGTTTGGCAC  
CTTGTGGTTGCTGAGCTGGTACGGGACATACAGGTTTTGGTATCCGAAAGCCTTTTCCCGAGACTTCTCCCGAGCTGTAGTTGAAATTTGAAGCAAGATAGTTACA  
AGAAATAA  
> calJac3  
ATGGAGCATCTGGAGCGCTGCGCATGGTTCTCCTCGGGGGACGCTAGTGGCGGGCGCGTGGTGGCGGCTATCTGCCCTGGGCGCTGGTGGCCTCCATGCTGGCGGGCTCCC  
TCCTCAAGGAGTTGTCGCCGTTGCCGAGAGCTACCTCAGCAACAAGCGCAACGTCCTCAACGTGATTTTGTCAAAGTGGCCTGGGCTGGACGTTCTGCTCCTCCTGCC  
TTTCATTGCCCTACCAACTACCATCTGACCGCAAGGCTGGCTTGGTCTGCGGGCGCTGAGCACCTGCTTGTGGGCACGGCCATCTGGTACATCTGCACCTCCATCTTC  
TCCAACCTGCAACACTACACGGGACGCTGCTACCAGTCCCGGCCCTGGAGGGGGTCAAGAAAGAACACCCAGAGCAAGCAGCAGTGCACCCAGGAAGGGGGCTTTTGGCA  
TGGCTTTGACATCTCAGGTCACTCCTTCTGCTGACCTTCTGCGCCCTCATGATTGTTAGAAGAGATGCTGTGCTGCATGAGGTGAAGACGGACCGAAGCCACTGCCTCCAC  
ACCGCCATCACCACCTGGTTGTGGCCCTGGGCATTCTGACTTTTCATCTGGGTGTTGATGTTTCTGTGCACAGCTGTTATTTCCACAACCTTGTCCAGAAAGGTTTGGCAC  
CTTGTGGTTGCTGAGCTGGTACGGGACATACAGGTTTTGGTATCCGAAAGCCTTTTCCCGAGACTTCTCCCGAGCTGTAGTTGAAATTTGAAGCAAGATAGTTACA  
AGAAATAA











>heMac3

ATGATGCAGGAATCTGCGACAGAGACAATAAGCAACAGTTCAATGAATCAAAATGGAATGAGCACTCTAAGCAGCCAATAGATGCTGGCAGCAGAGATGGAAGATCAAGTG  
GTGACACCAGCTCTGAAGTAAGCACAGTGAAGTCTGCATCTGCAACAACAGCAGGCTCTCCAGGCAGCAAGACAACCTCTTTACAGCAGCAACAAGTGGATGAAATCT  
CCTAAGAGCAGTGATAAACAGAGACCCTGCAAGTGCCTGTGTCCAGTGGCCATGATGACTCCCAAGTGTATCACCCTCAGCAAAATGCAGCAGATCTTCAGCAACAAGTCC  
TGCTCCTCAGCAGTCCAAGCCCTTCCAACAGCAGCAGGCGCTCATGTGACAGCAACAACCTCAAAAGATGTTTTCAAGAAACAGCAAGAGCAGTTCATCTCAAGCTT  
TT-----

gcagcagcagcaaacgagcagcagcagcaaacgagcaTCTGGAAAGCAAGCGAAGAGCgagcagcagcagcagcagcagcaaacgagcTTGGCAGCCAGCAGCTTGTCTCCAGCAGCAGCTTCTC  
CAGATGCAACAACCTCCAGCAGCAGCAGCATCTGCTCAGCCTCAGCGTCCAGGACTCATCTCCATCCACCTGGCCAGGCGGCACTTCTGTCCAATCGTGCCTCAAGCTG  
GCTTAAGTCTGCTGAGATTGAGCAGTTATGGAAGAAAGTACTGGAGTTACAGTATGGAAGACAATGGCATTAAACATGGAGGGCTAGACCTCACTACTAACAATTCCTCC  
TCGACTACCTCCTCCACCCTTCCAAGCATCCACCACAATAACTCATATCCATAGTGAATGGACAGTCTTCAGTTCTAAATGCAAGACGAGACAGCTCGTCACATGAGGA  
GACTGGGGCCTCTCACACTCTATGGCCATGGAGTTTGAACAATGGCCAGGCTGTGAAGCAATTTGTGAAGATTTTGGACAGTTTTAAAGCACCCTAACAAATGAACACGCAT  
TGGATGACCGAAGCAGCCGCTCAGTGTGAGTGCAAAATGCAGGTGGTGAACAAGTATGAAATACAGCTTCTTAAAGAACGCGAAGCTTCTCAAGCAATGATGACCCACTTGC  
CATGCGACCCTCAGAGCCCAACCATCTCCAAACCCTAAATCTGGTGTCTAGTGTCCAGTATGCGAAGAATATGTTGGAGACATCCCAACAGAGCTTACCTCAAACCCTA  
CCACCAACCAAGCCGCCCCAGTCAACCCGATTACCCAGGGACCCCTCAGTAATCACCCAGCCAGTGTGCCAATGTGGGAGCCATACGAAGGCGACATTCAGACAAATACAACA  
TTCCATGTCTATCAGAAATGGCCCCAACTACGAATTTTATAAAAATGCGAGTGTGAGCCCTCCATTTACTTATGCAACTCTATAAGGCAGGCTATCATGGAGTCTATCTGACA  
GGCAGTTAACACTTAAAGAAATTTACAGCTGGTTACACGGCAGTTTGTCTACTTCAGGCGTAATGCAAGCAACTTGAAGAATGCAGTACGTCAATCTTAGCTGCAACAAGT  
GTTTTTGTGAGTAGAAATGTTAAAGAGCAGTATGGACTGTGAGTGAAGTGAAGTACCAGAAGCGAAGGTCACAAAAGATAACAGGAAGTAAACCTTAGCTGAAAATATA  
CCTACCAGTTTAGGCTATGGAGCAGCTTAAATGCCAGTTTGCAGGCTGCCTTGGCAGAGAGCAGTTTACCTTTGCTAAGTAACTCTGGACTGATCAATATGCATCCAGTGG  
CCTACTGCAGGCTGTCCAGAAAGCCTCAATGGTTCTCTGGATCACATTGACAGCAACGGAACAGTAGTCCGGGCTGCTGCCTCAGCCGACATACATTCATCCATGTG  
AAGAAAGGCCAGTATTGACAGAGGATGAAGACTGTCCAAATGTCCATTGACCAACAGCTAATCAGTCCAGAAATAGAAAGACGACAGAGAGATGAAGAAGAGCCCTTAT  
CTGAAGATCTGGAATGA

Lysozyme

>panPan1

ATGAAGGCTCTCATTGTTCTGGGGCTTGTCTCCTTTCTGTTACCGTCCAGGGCAAGGCTTTTGAAGGTTGTGAGTTGGCCAGAACTCTGAAAAGATTGGGAATGGATGGCTA  
CAGGGGAATCAGCCTAGCAAACTGGATGTGTTTGGCCAAATGGGAGAGTGGTTATAACACACAGAGCTACAAACTACAATGCTGGAGACAGAAGCACTGATTATGGGATATTT  
CAGATCAATAGCCGCTACTGGTGTAAATGATGGCAAAACCCAGGAGCAGTTAATGCCTGTCAATATCCTGCAAGTCTTGTGCAAGATAACATCGCTGATGCTGTAGCTTG  
TGCAAAAGAGGGTTGTCGTGATCCACAAGGCATTAGAGCATGGTGGCATGGAGAAATCGTTGTCAAACAGAGATGTCGTGATGTTCAAGGTTGTGGAGTATAA

>rhIRox1

ATGAAGGCTCTCATTATTCTGGGGCTTGTCTCCTTTCTGTCACGGTCCAGGGCAAGATCTTTGAAAGGTTGTGAGTTGGCCAGAACTCTGAAAAGATTGGGACTGGATGGCTA  
CAAGGGAGTCAAGCCTAGCAAACTGGTGTGTTTGGCCAAATGGGAGAGTGGTTATAACACACAGAGCTACAAACTACAATGCTGGAGACCAAGCACTGATTATGGGATATTT  
AGATCAATAGCCGCTACTGGTGTAAATGATGGCAAAACCCAGGAGCAGTTAATGCCTGTCAATATCCTGCAAGTCTTGTGCAAGATAACATCGCTGATGCTGTAGCTTG  
GCAAAAGAGGGTTGTGAGTATCCACAAGGCATTAGAGCATGGTGGCATGGAGAAACCACTGTCAAACAGAGATGTCAGTCAAGTAAAGGTTGTGGAGTATAA

>gorGor3

ATGAAGGCTCTCATCGTTCTGGGGCTTGTCTCCTTTCTGTTATGGTCCAGGGCAAGGCTTTTGAAGGTTGTGAGTTGGCCAGAACTCTGAAAAGATTGGGAATGGATGGCTA  
CAGGGGAATCAGCCTAGCAAACTGGATGTGTTTGGCCAAATGGGAGAGTGGTTATAACACACAGAGCTACAAACTACAATGCTGGAGACAGAAGCACTGATTATGGGATATTT  
CAGATCAATAGCCGCTACTGGTGTAAATGATGGCAAAACCCAGGAGCAGTTAATGCCTGTCAATATCCTGCAAGTCTTGTGCAAGATAACATCGCTGATGCTGTAGCTTG  
TGCAAAAGAGGGTTGTCGTGATCCACAAGGCATTAGAGCATGGTGGCATGGAGAAATCGTTGTCAAACAGAGATGTCGTGATGTTCAAGGTTGTGGAGTATAA

>panTro4

ATGAAGGCTCTCATTGTTCTGGGGCTTGTCTCCTTTCTGTTACCGTCCAGGGCAAGGCTTTTGAAGGTTGTGAGTTGGCCAGAACTCTGAAAAGATTGGGAATGGATGGCTA  
CAGGGGAATCAGCCTAGCAAACTGGATGTGTTTGGCCAAATGGGAGAGTGGTTATAACACACAGAGCTACAAACTACAATGCTGGAGACAGAAGCACTGATTATGGGATATTT  
CAGATCAATAGCCGCTACTGGTGTAAATGATGGCAAAACCCAGGAGCAGTTAATGCCTGTCAATATCCTGCAAGTCTTGTGCAAGATAACATCGCTGATGCTGTAGCTTG  
TGCAAAAGAGGGTTGTCGTGATCCACAAGGCATTAGAGCATGGTGGCATGGAGAAATCGTTGTCAAACAGAGATGTCGTGATGTTCAAGGTTGTGGAGTATAA

>calJac3

ATGAAGGTTCTCATTATTCTGGGGCTTGTCTCCTTTCTGTCATGGTCCAGGGCAAGGCTTTTGAAGGTTGTGAGTTGGCCAGAACTCTGAAAAGATTGGGACTGGATGGCTA  
CAGGGGAATCAGCCTAGCAAACTGGATGTGTTTGGCCAAATGGGAGAGTGGTTATAACACACAGAGCTACAAACTACAATGCTGGAGACCAAGCACTGATTATGGGATATTT  
AGATCAATAGCCGCTACTGGTGTAAATGATGGCAAAACCCAGGAGCAGTTAATGCCTGTCAATATCCTGCAAGTCTTGTGCAAGATAACATCGCTGATGCTGTAGCTTG  
GCAAAAGAGGGTTGTCCGCGATCCACAAGGCATTAGAGCATGGTGGCATGGAGAAAGCTCATTGTCAAACAGAGATGTCAGTCAAGTAAAGGTTGTGGAGTATAA

>nasLar1

ATGAAGGCTCTCATTATTCTGGGGCTTGTCTCCTTTCTGTCACCGTCCAGGGCAAGATCTTTGAAAGGTTGTGAGTTGGCCAGAACTCTGAAAAGATTGGGACTGGATGGCTA  
CAAGGGAGTCAAGCCTAGCAAACTGGTGTGTTTGGCCAAATGGGAGAGTGGTTATAACACACAGAGCTACAAACTACAATGCTGGAGACCAAGCACTGATTATGGGATATTT  
CAGATCAATAGCCGCTACTGGTGTAAATGATGGCAAAACCCAGGAGCAGTTAATGCCTGTCAATATCCTGCAAGTCTTGTGCAAGATAACATCGCTGATGCTGTAGCTTG  
TGCAAAAGAGGGTTGTCAGTATCCACAAGGCATTAGAGCATGGTGGCATGGAGAAATCGTTGTCAAACAGAGATGTCAGTCAAGTAAAGGTTGTGGAGTATAA

>chlSab2

ATGAAGGCTGTCTCATTATTCTGGGGCTTGTCTCCTTTCTGTCACGGTCCAGGGCAAGGCTTTTGAAGGTTGTGAGTTGGCCAGAACTCTGAAAAGATTGGGACTGGATGGCTA  
CAGGGGAATCAGCCTAGCAAACTGGATGTGTTTGGCCAAATGGGAGAGTGGTTATAACACACAGAGCTACAAACTACAATGCTGGAGACCAAGCACTGATTATGGGATATTT  
CAGATCAATAGCCGCTACTGGTGTAAATGATGGCAAAACCCAGGAGCAGTTAATGCCTGTCAATATCCTGCAAGTCTTGTGCAAGATAACATCGCTGATGCTGTAGCTTG  
GCAAAAGAGGGTTGTCCGCGATCCACAAGGCATTAGAGCATGGTGGCATGGAGAAATCGTTGTCAAACAGAGATGTCAGTCAAGTAAAGGTTGTGGAGTATAA

>salBof1

ATGAAGGTTCTCATTATTCTGGGGCTTGTCTCCTTTCTGTCATGGTCCAGGGCAAGGCTTTTGAAGGTTGTGAGTTGGCCAGAACTCTGAAAAGATTGGGACTGGATGGCTA  
CAGGGGAATCAGCCTAGCAAACTGGATGTGTTTGGCCAAATGGGAGAGTGGTTATAACACACAGAGCTACAAACTACAATGCTGGAGACCAAGCACTGATTATGGGATATTT  
AGATCAATAGCCGCTACTGGTGTAAATGATGGCAAAACCCAGGAGCAGTTAATGCCTGTCAATATCCTGCAAGTCTTGTGCAAGATAACATCGCTGATGCTGTAGCTTG  
GCAAAAGAGGGTTGTCCGCGATCCACAAGGCATTAGAGCATGGTGGCATGGAGAAATCGTTGTCAAACAGAGATGTCAGTCAAGTAAAGGTTGTGGAGTATAA

>papAnu2

ATGAAGGCTGTCTCATTATTCTGGGGCTTGTCTCCTTTCTGTCACGGTCCAGGGCAAGATCTTTGAAAGGTTGTGAGTTGGCCAGAACTCTGAAAAGATTGGGACTGGATGGCTA  
CAGGGGAATCAGCCTAGCAAACTGGATGTGTTTGGCCAAATGGGAGAGTGGTTATAACACACAGAGCTACAAACTACAATGCTGGAGACCAAGCACTGATTATGGGATATTT  
AGATCAATAGCCGCTACTGGTGTAAATGATGGCAAAACCCAGGAGCAGTTAATGCCTGTCAATATCCTGCAAGTCTTGTGCAAGATAACATCGCTGATGCTGTAGCTTG  
CAAAGAGGGTTGTGAGTATCCACAAGGCATTAGAGCATGGTGGCATGGAGAAATCGTTGTCAAACAGAGATGTCAGTCAAGTAAAGGTTGTGGAGTATAA

>hg38

ATGAAGGCTCTCATTGTTCTGGGGCTTGTCTCCTTTCTGTTACCGTCCAGGGCAAGGCTTTTGAAGGTTGTGAGTTGGCCAGAACTCTGAAAAGATTGGGAATGGATGGCTA  
CAGGGGAATCAGCCTAGCAAACTGGATGTGTTTGGCCAAATGGGAGAGTGGTTATAACACACAGAGCTACAAACTACAATGCTGGAGACCAAGCACTGATTATGGGATATTT  
CAGATCAATAGCCGCTACTGGTGTAAATGATGGCAAAACCCAGGAGCAGTTAATGCCTGTCAATATCCTGCAAGTCTTGTGCAAGATAACATCGCTGATGCTGTAGCTTG  
TGCAAAAGAGGGTTGTCGTGATCCACAAGGCATTAGAGCATGGTGGCATGGAGAAATCGTTGTCAAACAGAGATGTCGTGATGTTCAAGGTTGTGGAGTATAA

>macFas5

ATGAAGGCTGTCTCATTATTCTGGGGCTTGTCTCCTTTCTGTCACGGTCCAGGGCAAGATCTTTGAAAGGTTGTGAGTTGGCCAGAACTCTGAAAAGATTGGGACTGGATGGCTA  
CAGGGGAATCAGCCTAGCAAACTGGATGTGTTTGGCCAAATGGGAGAGTGGTTATAACACACAGAGCTACAAACTACAATGCTGGAGACCAAGCACTGATTATGGGATATTT  
AGATCAATAGCCGCTACTGGTGTAAATGATGGCAAAACCCAGGAGCAGTTAATGCCTGTCAATATCCTGCAAGTCTTGTGCAAGATAACATCGCTGATGCTGTAGCTTG  
CAAAGAGGGTTGTGAGTATCCACAAGGCATTAGAGCATGGTGGCATGGAGAAATCGTTGTCAAACAGAGATGTCAGTCAAGTAAAGGTTGTGGAGTATAA

>nomLeu3

ATGAAGGCTCTCATTATTCTGGGGCTTGTCTCCTTTCTGTTACGGTCCAGGGCAAGGCTTTTGAAGGTTGTGAGTTGGCCAGAACTCTGAAAAGATTGGGAATGGATGGCTA  
CAGGGGAATCAGCCTAGCAAACTGGATGTGTTTGGCCAAATGGGAGAGTGGTTATAACACACAGAGCTACAAACTACAATGCTGGAGACCAAGCACTGATTATGGGATATTT  
CAGATCAATAGCCGCTACTGGTGTAAATGATGGCAAAACCCAGGAGCAGTTAATGCCTGTCAATATCCTGCAAGTCTTGTGCAAGATAACATCGCTGATGCTGTAGCTTG  
TGCAAAAGAGGGTTGTCGTGATCCACAAGGCATTAGAGCATGGTGGCATGGAGAAATCGTTGTCAAACAGAGATGTCGTGATGTTCAAGGTTGTGGAGTATAA

>ponAbe2

ATGAAGGCTCTCATTATTCTGGGGCTTGTCTCCTTTCTGTTACAGTCCAGAGCAAGGCTTTTGAAGGTTGTGAGTTGGCCAGAACTCTGAAAAGATTGGGAATGGATGGCTA  
CAGGGGAATCAGCCTAGCAAACTGGATGTGTTTGGCCAAATGGGAGAGTGGTTATAACACACAGAGCTACAAACTACAATGCTGGAGACCAAGCACTGATTATGGGATATTT  
CAGATCAATAGCCGCTACTGGTGTAAATGATGGCAAAACCCAGGAGCAGTTAATGCCTGTCAATATCCTGCAAGTCTTGTGCAAGATAACATCGCTGATGCTGTAGCTTG  
TGCAAAAGAGGGTTGTCGTGATCCACAAGGCATTAGAGCATGGTGGCATGGAGAAATCGTTGTCAAACAGAGATGTCGTGATGTTCAAGGTTGTGGAGTATAA

>heMac3

ATGAAGGCTGTCAATTTCTGGGCTTGTCCCTCTTCTGTACGGTCCAGGCAAGATCTTTGAAAGGTGTGAGTTGGCCAGAACTCTGAAAAGATTGGGACTGGATGGCTA  
CAGGGGAATCAGCCTAGCAAACCTGGGTGTGTTGGCCAAATGGGAGAGTAATTATAACACACAAGCTACAAACTACAATCTGGAGACCAAAGCACTGATTTATGGGATATTTCT  
AGATCAATAGCCACTACTGGTGAATAATGGCAAAACCCAGGAGCAGTTAATGCCTGTATATATCTGCAATGCTTTGCTGCAAGATAACATCGCTGATGCTGTAACCTTTGTG  
CAAAGAGGTTGTCACTGATCCACAAGGCATTAGAGCATGGGTGGCATGGAGAAATCACTGTCAAAAACAGAGATGTCACTGATGTTCAAGGTTGTGGAGGTGTA

OPN1LW

>panPan1

ATGGCCAGCAGTGGAGCCTCCAAGGCTCGCAGGCCGCATCCGAGGACAGCTATGAGGACAGCACCCAGTCCAGCATCTTACCTACACCAACAGCAACTCCACCAGA  
G-----

>rhoRox1

ATGGCCAGCAGTGGAGCCTCCAAGGCTCGCAGGCCGCATCCGAGGACAGCTATGAGGACagcaccagtcagcatcttcaactacaccaagcaactccaccaGAG-----

GTACTGGCCCCACGGCTGAAGACTTCATGCGGC-----

ATGGTGTATGATCTTTCATGACTGCGTCTGCTGGGGACCTTACA-----

>gorGor3

ATGGCCAGCAGTGGAGCCTCCAAGGCTCGCAGGCCGCATCCGAGGACAGCTATGAGGACAGCACCCAGTCCAGCATCTTACCTACACCAACAGCAACTCCACCAGA  
G-----

GGATCACAGGCTCTGGTCTCTGGCCATCATTCTGGGAGAGGTGGTGGTGGTGTGCAAGCCCTTTGGCAACGTGAGATTTGATGCCAAGCTGGCCATCGTGGGCATTG  
TCTTCTCCTGGGTCTGGGCTGCTGTGTGGACAGCCCGCCATCTTTGGTTGGAGCAG-----

>panTro4

ATGGCCAGCAGTGGAGCCTCCAAGGCTCGCAGGCCGCATCCGAGGACAGCTATGAGGACAGCACCCAGTCCAGCATCTTACCTACACCAACAGCAACTCCACCAGA  
GACCCATTCGAAGGCCCAATTACCACATCGCTCCAGATGGGTATACCACCTCACCAGTGTCTGGATGATCTTTGGTTCATTGATCTGCTTCCACAAATGGGCTTGTGCT  
GGCGGCCACCATTGAAGTTCAAGAAGCTCGCCACCCGCTGAACCTGGTGAACCTGGCGTCTGCTGACCTAGCAGAGACTGTACCTGCCAGCACTATCAGCGTTGT  
GAACAGGCTCTCGCTACTTCGTGCTGGCCACCCTATGTGTCTCGGAGGGCTACACCGTCTCCCTGTGTGGGATCACAGGCTCTGGTCTTGCCATCTTTCTGG  
GAGAGGTGGCTGGTGGTGTGCAAGCCCTTTGGCAATGTGAGATTTGATGCCAAGCTGGCCATCATTGGCATTTGCCCTTCTCTGGATCTGGTCTGCTGTGTGGACAGCCCC  
CCCATCTTTGGTGGAGCAGGTACTGGCCCCACGGCTGAAGACTTCATGCGGCCAGACAGCTGTTACGCGGACAGCTCGTACCCCGGGGTGCACTTACATGATTGTCTC  
ATGGTCACTGCTGCATCATCCACTCGCTATCATCTGCTCTGCTACCTCCAAGTGTGGCTGGCCATCCGAGCGGTGGCAAAAGCAGCAGAAAGAGTCTGAATCCACCAGA  
AGCAGAGAAGGAAGTACGCGCATGGTGGTGGTGTGATGATCTTTCGCTACTGCGTCTGCTGGGACCCCTACACCTTCTTCGATGCTTTGCTGCTGCCAACCCCTGGCTACG  
CCTTCCACCCTTTGATGGCTGCCCTGCCGCTACTTTGCCAAAAGTGCCTATCTACAACCCCGTTATCTATGTCTTTATGAACCCGCAAGTTTCAAAGTGCATCTTGCAG  
CTTTTGGGAAGAAGGTTGACGATGGCTCGAAGCTCTCCAGCGCCTCCAAAACGGAGGTTCTCATCTGTGCTCCTGGTATCGCCTGCATGA

>calJac3

ATGGCCAGCAGTGGAGCCTCCAAGGCTCGCAGGCCGCATCCGAGGACAACTATGAGGACAGCACCCAGTCCAGCATCTTACCTACACCAACAGCAACTCCACCAGA  
GGTCCCTTCGAAGGCCCAATTACCACATCGCTCCAGATGGGTGTACCACCTCACCAGTGTCTGGATGCTCTTCTGGTGTGCTGCATCCGCTTCCAGAAATGGGCTGGTCC  
TGGCGGCCACCATTGAAGTTCAAGAAGCTTCGCCACCCCTGAACCTGGATCCTGGTGAACCTGGCGATCGCTGACCTGGCAGAGACCGTCACTGCCAGCACTATCAGCGTCTG  
TGAAACAGGTTACGGCTACTTCGTGCTGGGCCACCCGATGTGTCTCGAAGGGCTACACCGTCTCCCTGTGCGGGATCAGGGGTCTCTGGTCCCTGGCCATCATTCTCT  
GGGAGAGGTGGCTGGTGTCTGCAAGCCCTTTGGCAACCTGAAGATTTGATGCCAAGCTGGCCATTTGGGGAAGTTGCCCTTTTCTGGATCTGGTCTGCTTGTGGACGGCC  
CGCCATCTTTGGTGGAGCAGGTACTGGCCCCATGGCCTGAAGACTTCCTGCGGCCAGATGTGTTCAAGTGGCAGCTCGTACCCCGGGGTGCACTTACATGATCGTCC  
TCATGATCACATGCTCTTCCCTCCACTTGGCATTTGTGCTCTGCTTCCAAGTGTGGCTGGCCATCCGAGCGGTGGCAAAAGCAGCAGAAAGTCCGAATCCACCCA  
GAAGGCAGAGAAGGAAGTACGCGCATGGTGGTGGTGTGATGATCGTGGCGTATTGCGTCTGCTGGGACCCCTACACCTTCTTCGATGCTTTGCTGCTGCCAACCCCTGGCTA  
CGCTTCCACCCTCTGATGGCTGCCCTGCCAGCCCTACTTTGCCAAAAGTGCCTATCTACAACCCCAATTTATCTATGTCTTTATGAACCCGCAAGTTTCAAAGTGCATCTTGCAG  
GCTTTTGGGAAGAAGGTTGACGATGGCTCGAAGCTCTCCAGCGCCTCCAAAACGGAGGTTCTCATCTGTGCTCCTGGTATCGCCTGCATGA

>nasLar1

ATGGCCAGCAGTGGAGCCTCCAAGGCTCGCAGGCCGCATCCGAGGACAGCTATGAGGACagcaccagtcagcatcttcaactacaccaagcaactccaccaGAGGCCCTTTGAAG  
GCCCAACTACCACATCGCTCCAGATGGGTGTACCACCTCACCAGTGTCTGGATGATCTTTGGTTCATCGCATCCGCTTCCACAAATGGGCTTGTGCTGGCTGCCACCAT  
GAAGTTCAAGAAGTTGCGCCACCCGCTGAAGTGGATCCTGGTGAACCTGGCGGTTGTGACCTAGCAGAG-----

GAATCACAGGTTCTGGTCCCTGGCCATCATTCTGGGAGAGGTGGTGTGTTGCTGCAAGCCCTTTGGCAACGTGAGATTTGATGCCAAGCTGCCATCGTGGGCATTGC  
CTTCTCCTGGATCTGGTCTGCTGTGTGGACGGCCCGCCATCTTTGGTTGGAGCAG-----

GTGGCAAAGCAGCAGAAAGTCTGAATCCACCCAGAAGGCAGAAAGGAA-----

TTGCTGCTGCCAACCCCTGGCTACGCCCTTCCACCCTCTGATGGCTGCCCTGCCAGCTACTTTGCCAAAAGTGCCTACTTCAACACCCCAATTTATCTATGTCTTTATGAACCCG  
CAGTTTTCAAGAACTGATCTTGCAGCTTTTTGGGAAGAAGTTGACGATGGCTTGAACCTCGCATCTCCAGCGCCTCCAAAACGGAGGTTCTATCTGTGCTCCTGGTGTGCCCTGCAT  
GA

>chlSab2

ATGGCCAGCAGTGGAGCCTCCAAGGCTCGCAGGCCGCATCCGAGGACAGCTATGAGGACagcaccagtcagcatcttcaactacaccaagcaactccaccaGAGGCCCTTTGAAG  
GCCCAACTACCACATCGCTCCAGATGGGTGTACCACCTCACCAGTGTCTGGATGATCTTTGGTTCACCCGCATCCGCTTCCACAAATGGGCTTGTGCTGGCTGCCACCAT  
GAAGTTCAAGAAGCTGGCCACCCGCTGAACCTGGATCCTGGTGAACCTGGCAGTTGCTGACCTAGCAGAGACCGTCACTGCCAGCACTATCAGTGTGGTGAACCAAGGTTCT  
GGCTACTTCGTGCTGGGCCACCCTATGTGTCTCGAAGGCTTACCAGTCTCCCTGTGGGATCACAGGTTCTGGTCCCTGGCCATCATTTCATGGGAGAGGTGGCTG  
GTGGCTGCAAGCCCTTCGGCAACGTGAGATTTGATGCCAAGCTGCCATCGTGGGAAGTTGCCCTTCTGATCTGGTCTGGTGTGTTGAGCAGGCCCGCCATCTTTGGT  
GGAGCAGGTACTGGCCCCACGGCTAAAGACTTCATGTGCCCTGATGTGTTCAAGTGGCAGCTCGTACCCCGGGGTGCACTTACATGATTGCTCCTCATGGTCACTGCT  
GCATCTTCCACTGGCTATCATGCTGCTGCTACCTCCAAGTGTGGCTGGCCATCCGAGCGGTGGCAAAAGCAGCAGAAAGAGTCTGAATCCACCCAGAAGGCAGAGAAGG  
AAGTGACGGCATGGTGTGATGGTGTGATGATCTTGCATACCTGCGTCTGCTAGGGGACCCCTGACCTTCCGATGCTTTGCTGCTGCCAACCCCTGGCTACGCCCTTCCACCCT  
GATGGCTGCTTCCAGCCCTACTTTGCCAAAAGTGCCTACTTACAACCCCAATTTATCTATGCTTTATGAACCCGCAAGTTTCAAAGTGCATCTTGCAGCTTTTTGGGAAGAA  
GGTTGACGATGGCTCGAAGCTCTCCAGCGCCTCCAAAACGGAGGTTCTCATCTGTGCTCCTGGTGTGCCCTGCATGA

>saiBo1

ATGGCCAGCAGTGGAGCCTCCAAGGCTCGCAGGCCGCATCCGAGGACAACTATGAGGACAGCACCCAGTCCAGCATCTTACCTACACCAACAGCAACTCCACCAGA  
GGCCCTTTGAAGGCCCAATTACCACATCGCTCCAGATGGGTGTACCACCTCACCAGTGTCTGGATGATCTTTGGTTCACCCGCATCCGCTTCCACAAATGGGCTTGTGCT  
TGGCGGCCACCATTGAAGTTCAAGAAGCTTCGCCACCCCTGAACCTGGATCCTGGTGAACCTGGCAGTTGCTGACCTGGCAGAGACCGTCACTGCCAGCACTATCAGCATCTG  
GAACCATCTACGGCTACTTCGTGCTGGGCCACCCGATGTGTCTCGAAGGCTTACCAGTCTCCCTGTGGGATCACAGGTTCTGGTCCCTGGCCATCATTTCATGGGAGAGGTGGCTG  
GGAGAGGTGGCTGGTGTGCTGCAAGCCCTTTGGCAACGTGAGATTTGATGCCAAGCTGGCCATCGTGGGAGTTGCTTCTCCTGGATCTGGGCTGCTGTGTGGACAGCCCC  
ACCCATCTTTGGTGGAGCAGGTACTGGCCCCATGGCCTGAAGACTTCCTCGGCCAGACAGTGTTCAGTGGCAGCTCGTACCCCGGGGTGCACTTACATGATGCTGCT  
CATGTGATGCTGCTACTTCCACTGACATCATTTGCTCTGCTGCTAGGGGACCCCTGACCTTCCGATGCTTTGCTGCTGCCAACCCCTGGCTACGCCCTTCCACCCT  
AAGGCAGAGAAGGAAGTACGCGCATGGTGGTGGTGTGATGATCGGCTATTCGCTCTGCTGCTGGGACCCCTACACCTTCTTGCATGCTTTGCTGCTGCCAACCCCTGGCTAC  
GCCCTTCCACCCTTCCAGCCCTACTTTGCCAAAAGTGCCTACTTACAACCCCAATTTATCTATGCTTTATGAACCCGCAAGTTTCAAAGTGCATCTTGCAGCTTTTTGGGAAGAA  
CTTTTTGGGAAGAAGGTTGATGATGGCTCGAAGCTCTCCAGCGCCTCCAAAACGGAGGTTCTCATCTGTGCTCCTGGTGTGCCCTGCATGA

>papAnu2

ATGGCCAGCAGTGGAGCCTCCAAGGCTCGCAGGCCGCATCCGAGGACAGCTATGAGGACAGCACCCAGTCCAGCATCTTACCTACACCAACAGCAACTCCACCAGA  
GGCCCTTTGAAGGCCCAATTACCACATCGCTCCAGATGGGTGTACCACCTCACCAGTGTCTGGATGATCTTTGGTTCACCCGCATCCGCTTCCACAAATGGGCTTGTGCT  
TGGCGGCCACCATTGAAGTTCAAGAAGCTTCGCCACCCCTGAACCTGGATCCTGGTGAACCTGGCAGTTGCTGACCTGGCAGAGACCGTCACTGCCAGCACTATCAGTGTGT  
GAACCATCTACGGCTACTTCGTGCTGGGCCACCCGATGTGTCTCGAAGGCTTACCAGTCTCCCTGTGGGATCACAGGTTCTGGTCCCTAGCCATCATTCTCTGG  
GAACAGGTTCTATGGCTACTTCGTGCTGGGCCACCCTATGTGTCTCGAAGGCTACACCGTCTCCCTGTGGGATCACAGGTTCTGGTCCCTAGCCATCATTCTCTGG  
GAGAGATGGATGGTGGTCTGCAAGCCCTTTGGCAACGTGAGATTTGATGCCAAGCTGCCATCGTGGGCATTGTCTTCTCCTGGGATGGGCTGCTGTGTGGACGGCCCCG









GTACATCTCAGAATCTTGATCTGGAACAGATTGTCTTCCCATGGATTCTGAATGTGCTTAATTTGAAAGCCCTTGTATTTTACAAAGTGATTGAAAGTTTTATAAAGCAGAA  
GGCAACCTTGACAAGAGAAATGATAAAACACTTGAACACAGTGAACACTGTGAACCTGTGAACTTGAATCGAATCCCTTGCAATGGCTCTCAGATTCACTTTATTTGATCTTATTAACAATCAAAG  
GACCGAGAAGGACCACTGATCACTTTGAATCTGCTGTCTCTTAACTTCTCTCCAGAATAATCACTGCAGCAGATATGTATCTTTCTCTGTAGATCTCCAAGAAA  
AAAGGTTCAACTACACCTGTAAATTTACTGCAAAATGCAGAGACACAACAACCTCAGCCTTCCAGACCAGAACGCAATGAAATCTACCTTCTTCTCACTGTTTTATAAAAA  
GTGATCCGGTAGCTTCTCCGGTAAATACACTATGTGAACGCTTCTATCTGAAACCCAGAACTAGAACACATCATCTGGACCTTTTCCGACACACGCTGCAGAAATGA  
GTATGAACCTCATGAGACAGGCACTTTGGACCAAAATATGATGTGTTCCATGATGAGCATATGCAAAAGTGAAGAATATAGACCTTAAATTCAAAATCATCTGTAACAGCAGATATAA  
GGATCTTCTCAGCTGTTCCAGGACATTCAAACGTGTTTGTGTAACAGAGAGGATGATGATCTTATAGTATCTATAAECTGGCTTCAAGCAGAGACTGAAAACAAAT  
ATTTTGCAGTATGCTTCCACCAGGCCCTACCTTGTCCAAATACCTCACATTCTCGAAGTCCTACAAGTTCTACTTCCACCTTACGGATTCTCGAGGGAACATCTAT  
ATTTCCACCCCTGAAGAGTCCATATAAAATTTTCAAGAGTCTCCCAACCAACAATAAAGTACTGCTCAAGATCAAGGATCTTAGTATCAATTTGGTGAATCATTTGGGACTTCTGAG  
AAGTTCCAGAAAATAAATCAGATGGTGTGAACAGCCAGCGGTGTGCTCAAAAAGAAAGTGCTGAAGGAAAGCAACCCCTCAACCCCTGAAAACACTACGCTTTGATATTGAAG  
ATCAGATGAAGCAGATGGAAGTAAACATCTCCAGGGGAGTCCAAATTTCCAGCAGAACTGGCAGAAATGACTTCTACTCGAACCAAGTGAAGGACGAAATGAAATGATA  
GCATGGATACCTCAACAAGGAGAGAAATGA

>gorGor3

ATGCCGCCAAAACCCCGAAAAAGGcccgccaccgcgcgctgcccgcgcccgaacccccggcgcgcccgcgcgcccCCTCTGAGGAGACCCAGAGCAGGACAGCGGCCGGAGGACC  
TGCCCTCTCGTAGGCTTGTAGTTTGAAGAAACAGAAAGAACCTGATTTTACTGCGTTATGTCAAGAAATAAAGATACCAGATCATGTCAAGAGAGAGGACTTGGTTAACTGGGAG  
AAAGTTTTCATCTGGTAGGATTTGGGAGGTTATATCAAAGAAAAAGAACCTGTGGGGAACTCTGATCTTTTATGCAAGCATTTGACCTAGATGAGATGCCGTTCACCTTT  
ACTGAGCTACAGAAAACATAGAATCAGTGTCCATAAATCTTTAACTTACTAAAAGAAATGATACCAGTACCAAAGTTGATAATGCTATGCAAGACTGTTGAAGAAGTATG  
ATGTATTGTTGCACTCTTCAGCAAAATGGAAAGACATGTGAATTTATATTTGACACAACCCAGCAGTTCGATATCTACTGAAATAAATCTGCATTGGTGTCTAAAAGTTTC  
TTGGATCACATTTTTATAGCTAAAAGGGGAAGTATTACAAATGGAAGATGATCTGGTGTATTTCAGTTAATTCAGTTAATGCTATGTGCTTTCAGTATTTTAACTCTCACCTCCCA  
TGTTGCTCAAAGAACCTTATAAACAGCTTTATACCCATTAATGGTTTCACTCGAACCCAGCAACCTCAGCCTCCAGAACCTGCAAGCAGGATGCAAGCAGGATGCAAGAACTGCAGAAATGA  
ACAAGAAATTTAGAGTTCTCTGAAGAACATGAATGTAATATAGATGAGGTGAAAAATGTTTTTCAAATAATTTATACCTTTTATGAATCTCTTGAGACTGTAACATCTAAT  
GGACTTCCAGAGGTTGAAAATCTTTCAAACGATACGAAGAAATTTATCTTAAAATAAAGTACTAGATGCAAGATTGTTTTGGATCATGATAAACTCTCAGACTGATCTA  
TAGACAGTTTTGAAACACAGAGAACCCAGAAAAGTAACTTGATGAAGAGGTGAATGTAATCTCCACACACTCCAGTTAGGACTGTTATGAACACTATCCAAACAATTA  
TGATGATTTAAATTCAGCAAGTATCAACCTTCAGAAAATCTGATTTCCATTTTAAACAACCTGCACAGTGAATCCAAAGAAAAGTATACTGAAAAGAGTGAAGGATATAGGATA  
CATCTTTAAAGGAACTTGGTAAAGCTTGGACAGGTTGGTGCAAAATGGATGGATTCAGCAGCTCAACGCTTACAGCAGGATGCAAGCAGGATGCAAGAACTGCAGAAATGA  
ATCAGAAGAACAGCACTGATCCATCCAAATTTAGCAAACTCTGAAATGCAACAACTTTTATCATGTTTATGTTGATGTTGCACTTGTGAGTTGTAATGGCCACATATAGCAGA  
AGTACATCTCAGAATCTTGATTTGGAACAGATTTGCTTTCCCATGGATTTGAATGTGCTTAATTTAAAAGCCTTTGATTTTTCAAAGCTGTCAGAAAGTATGATAAAGTATGATA  
AGGCAACTTGACAAGAGAAATGATAAAACATTTAGAACGATGTGAACATCGAATCATGGAATCCCTTGCTGGCTCTCAGATTACCTTTATTTGATCTTATAAACAATCAAAG  
GACCGAGAAGGACCACTGATACCTTGAATCTGCTTGCCTTAACTTCTCTCCAGAATAATCACTGCAGCAGATATGTATCTTCTCTGTGTAAGATCTCCAAGAAATG  
AAAGTTTCAACTACCGCTGATAATTTACTGCAAAATGCAGAGACACAAGCAACCTCAGCCTCCAGAACCCAGAAAGCTTTGAAATCTCACTGTTTTATAAAGAAA  
GTGATCCGGTAGCTATCTCCGGTAAATACACTTTTGAACGCTCTGTGCTGAGCACCACAAATAGAACAATATCATCTGGACCTTTTCCAGCAGCAACCTGCAGAAATGA  
GTATGAACCTCATGAGACAGGCACTTTGGACCAAAATATGATGTGTTCCATGATGAGTATGGAATGCAAAAGTGAAGAATATAGACCTTAAATTCAAAATCATTGTAAACAGCATA  
GGATCTTCTCATGCTGTTCCAGGACACTTCAAACGTGTTTTGATCAAGAAGAGGAGTATGATCTATTATAGTATTTATAAECTGGCTTTCATGCAGAGACTGAAAACAAT  
ATTTTGCAGTATGCTCCACCAGGCCCTACCTTGTCCACCAATACCTCACATTCTCGAAGCCCTTACAAGTTTCTAGTTCACCTTACGGATTCTGGAGGGAACATCTAT  
ATTTACCCCTGAAGAGTCCATATAAAATTTTCAAGAGTCTGCCAAACCAACAATAAAGTACTGCTCAAGAACTTGAATGATAAAGTCTTAGATCAATTTGGTGAATCATTTGGGACTTCTGAG  
AAGTTCCAGAAAATAAATCAGATGGTATGTAACAGCCAGCGGTGTGCTCAAAAAGAAAGTGCTGAAGGAAAGCAACCCCTCAACCCCTGAAAACACTACGCTTTGATATTGAAG  
ATCAGATGAAGCAGATGGAAGTAAACATCTCCAGGAGAGTCCAAATTTCCAGCAGAACTGGCAGAAATGACTTCTACTCGAACCAAGTGAAGGACGAAATGAAATGATA  
GCATGGATACCTCAACAAGGAGAGAAATGA

>panTro4

ATGCCGCCAAAACCCCGAAAAAGGcccgccaccgcgcgctgcccgcgcccgaacccccggcgcgcccgcgcgcccCCTCTGAGGAGACCCAGAGCAGGACAGCGGCCGGAGGACC  
TGCCCTCTCGTAGGCTTGTAGTTTGAAGAAACAGAAAGAACCTGATTTTACTGCGTTATGTCAAGAAATAAAGATACCAGATCATGTCAAGAGAGAGGACTTGGTTAACTGGGAG  
AAAGTTTTCATCTGGTAGGATTTGGGAGGTTATATCAAAGAAAAAGAACCTGTGGGGAACTCTGATCTTTTATGCAAGCATTTGACCTAGATGAGATGCCGTTCACCTTT  
ACTGAGCTACAGAAAACATAGAATCAGTGTCCATAAATCTTTAACTTACTAAAAGAAATGATACCAGTACCAAAGTTGATAATGCTATGCAAGACTGTTGAAGAAGTATG  
ATGTATTGTTGCACTCTTCAGCAAAATGGAAAGGACATGTGAATTTATATTTGACACAACCCAGCAGTTCGATATCTACTGAAATAAATCTGCATTGGTGTCTAAAAGTTTC  
TTGGATCACATTTTTATAGCTAAAAGGGGAAGTATTACAAATGGAAGATGATCTGGTGTATTTCAGTTAATTCAGTTAATGCTATGTGCTTTCAGTATTTTAACTCTCACCTCCCG  
TGTTGCTCAAAGAACCATATAAACAGCTTTATACCCATTAATGGTTTCACTCGAACCCAGCAACCTCAGCCTCCAGAACCCAGAAAGCTTTGAAATCTCACTGTTTTATAAAGAAA  
GTGATCCGGTAGCTATCTCCGGTAAATACACTTTTGAACGCTCTGTGCTGAGCACCACAAATAGAACAATATCATCTGGACCTTTTCCAGCAGCAACCTGCAGAAATGA  
GTATGAACCTCATGAGACAGGCACTTTGGACCAAAATATGATGTGTTCCATGATGAGTATGGAATGCAAAAGTGAAGAATATAGACCTTAAATTCAAAATCATTGTAAACAGCATA  
GGATCTTCCAGAGGTTGAAAATCTTTCAAACGATACGAAGAAATTTATCTTAAAATAAAGTACTAGATGCAAGATTATTTTGGATCATGATAAACTCTCAGACTGATCTAT  
AGACAGTTTTGAAACACAGAGAACCCACGAAAAGTAACTTGATGAAGAGGTTGAATGTCTTCCACACACTCCAGTTAGGACTGTTATGAACACTATCCAAACAATTA  
GATGATTTTTAAATTCAGCAAGTATCAACCTTCAGAAAATCTGATTTCCATTTTAAACAACCTGCACAGTGAATCCAAAGAAAAGTATACTGAAAAGAGTGAAGGATATAGGATAC  
ATCTTTAAAGAGAAATTTGCTAAAGCTGTTGGGACAGGGTTGTGCTGAATTTGGATCAGCAGATCAACAACTTGGAGTTGCTGTTATACCGGATTAATGAAATCCATGCTTAA  
TCAGAAGAAAGCACTGATTTCCGTTCAAATTTTAGCAAACTTGAATGCAACAACTTGAATGCAACAACTTTTATGCTTATTTAAAAGCCTTTGATTTTTCAAAGTATGCAAGAAATGATA  
GTACATCTCAGAATCTTGATTTGGAACAGATTTGCTTTCCCATGGATTCTGAATGTGCTTAATTTAAAAGCCTTTGATTTTTCAAAGTATGCAAGAAATTTATCAAAGCAGAA  
GGCAACTTGACAAGAGAAATGATAAAACATTTAGAACGATGTGAACATCGAATCATGGAATCCCTTGCATGGCTCTCAGATTACCTTTATTTGATCTTATAAACAATCAAAGG  
ACCGAGAAGGACCAACTGATCAACCTTCAGAAAATCTGATTTCCATTTTAAACAACCTGCACAGTGAATCCAAAGAAAAGTATACTGAAAAGAGTGAAGGATATAGGATAC  
AAAGTTTCAACTACCGCTGATAATTTACTGCAAAATGCAGAGACACAAGCAACCTCAGCCTCCAGAACCCAGAAAGCTTTGAAATCTACCTCTTTCACTGTTTTATAAAGAAA  
GTATCCGGTAGCTATCTCCGGTAAATACACTTTTGAACGCTTCTGCTGAAACCCAGTTCGATGCAAAAGTGAAGAATATAGACCTTAAATTCAAAATCATTGTAAACAGCATA  
TATGAACCTCATGAGACAGGCACTTTGGACCAAAATATGATGTGTTCCATGATGAGTATGCAAAAGTGAAGAATATAGACCTTAAATTCAAAATCATTGTAAACAGCATA  
GATCTTCCATGCTGTTCCAGGACACTTCAAACGTGTTTTGATCAAAAGAGGAGGATGATGATCTATTATAGTATTTATAAECTGGCTTTCATGCAGAGACTGAAAACAATA  
TTTTGCAATGCTTCCACAGGCCCTACCTTGTCCACCAATACCTCACATTCTTCCAGAACCTTACAAGTTTCCAGTATTTACCTTACCGGATTCTGAGGAACTGATCTATA  
TTTCCACCCGAGAAGTCCATATAAAATTTTCAAGAGTCTGCCAAACCAACAATAAAGTACTGCTCAAGAACTTGAATGATAAAGTCTTAGATCAATTTGGTGAATCATTTGGGACTTCTGAG  
AGTTCCAGAAAATAAATCAGATGGTATGTAACAGCCAGCGGTGTGCTCAAAAAGAAAGTGCTGAAGGAAAGCAACCCCTCAACCCCTGAAAACACTACGCTTTGATATTGAAG  
TCAGATGAAGCAGATGGAAGTAAACATCTCCAGGAGAGTCCAAATTTCCAGCAGAACTGGCAGAAATGACTTCTACTCGAACCAAGTGAAGGACGAAATGAAATGATA  
CATGGATACCTCAACAAGGAGAGAAATGA

>calJac3

ATGCCGCCAAAACCCCGAAAAAGGcccgccaccgcgcgctgcccgcgcccgaacccccggcgcgcccgcgcgcccCCTCTGAGGAGACCCAGAGCAGGACAGCGGCCGGAGGACTGCCTCTGGTCAAGGTTGA  
gcccgcgcccgcgcgctgcccgcgcccgaacccccggcgcgcccgcgcgcccCCTCTGAGGAGACCCAGAGCAGGACAGCGGCCGGAGGACTGCCTCTGGTCAAGGTTGA  
GTTTGAAGAAACTGAAGAACCTGATTTTACAGCGTTATGTCAAGAAATAAAGATACCAGATCATGTCAAGAGAGAGGACTTGGTTAACTTTGGGAGAAAGTTTATCTGTGGATGG  
AGTATTG-----  
TGTCTTTAAATCTTTGACTTACTAAAAGAAATGATACCAGTACCAAAGTTGATAATGCTATGTGCAAGACTGTTGAAGAAGTATAATGATTGTTGCACCTTTCAGCAAAATTA  
GAAAGGACATGCGAAGTATATATTTGACACAACCCAGCAGTTCGATATCTACTGAAATAAATCTGCATTTGGTGTCTAAAAGTTTCTGGATCACATTTTTATAGTAAAGGGG  
AAGTATTAACAATGGAAGTACTGTTGATTTTCACTTCAAGTTAATGTTGCTGCTGACTATTTTATAAECTCACTCTCGTGTGCTCAAAAGAACTTGAAGCAGGAAATGATAA  
GCTTTACCCATTAATGGTTTCACTCGAACCCAGGCGAGGTGCAAGACAGGAGTGCACGGATAGCCAAACAAGTGAATAAAGTATGATACGAGAAATATTGAGGTTCTCTGTAAGA  
ACAGAAATGTAATATAGATGAGGTTGAAAAATGTTTATAAATTTTAAACTTTATAGAAATCTCTTGGACTTGAACATCTAAATGGACTTCCAGAGGTTGAAAGTCTGTCTA  
AACGATACGAAGAAATTTTCTTAAAATAAAGATCTAGATGCAAGATTTTGGTTCATGATGAAACTTTCAGACTTTCAGACTGATCTATAGACAGGTTTTGAAGCAGAGAACACCC  
ACGAAAAGTAACTTGTATGAAAGGTTGAATGATTTCTCCGACACCTCCAGTTAGGACTTATGAAATACTCAACAATTAATGATGATTTTTAAATTCAGCAAGGATCA  
GCCATCAGAAAATCTGATTTCCATTTTAAACAATTCACAGTAACTCAAAAGAAAGTACTGAAAAGAGTGAAGGATTTGGATACATCTTTAAAAGAAATTTGCTGAAGCT  
GTGGGACAGGGATGTTGAAAATGGATCACAGGATACAAAATGGAGTTGCTTGTATTTACCGAGTAAATGGAATCCATGCTTAAATCAGAAGAAAGCAAGATTTCCATTCA  
AAAATTTAGCAAACTTCAAACGACAACTTTTTCATATGCTTTTATGGCGTGTGCTCTGGAGTTGTAATGGCCACATATAGCAGAAAGCACATCTCAGAACTTGTATTTGGA  
ACGATTTGCTCCTCCCATCTGAATGTCAATTTAAAAGCCTTTGATTTTTACAAGATGATGAAAGTTTTTCAAAGCAGAAAGGCAACTTGAACAAGAAATGATAA  
AACTTTAGAACGATGTGAACATCGAATCGAATCCCTTGCATGGCCTCAGATTCACCTTTTATGATCTTTAAACAATCAAAGCCGAGGAGGACCAAGTAACTTCA  
TTGAATCTGCTTCTCTTAATGTTTCCCTCCAGAAATAACACTGACAGCAGATATGATTTTCTTCTGTAAGATTTCCCAAAAGAAAAGGTTTCACTACAGCTGTAATTC  
TACTGAAATGCAGAGACAAAGCAACCTCAGCCTTCCAGACCCAGAAAGCATTGAAATCTACCTCTCTTCACTGTTTTATAAAGAAAGTATCGTCTAGCATATCTCCGGCT  
AAATACGCTGTGTGAACGCCTTTGTGCTGAGCACCAGAACTAGAACACATATCTTGGCCCTTTTCCAGACACAGCTGCAGAAATGAGTGAATCACTCATGAGACAGGCACT  
TGACCAAAATATGATGTTCCATGATTTGGCATATGCAAAAGTGAAGAATATAGACCTTAAATTTAAAGTATTTGAAACAGCATAAAGATCTTCCCTCATGCTTTCAGGAGAC  
TTTCAACGCTGTTGATCAAAGAAAGGAGTATGTTCTATTATAGTATTTATAAECTGAGTCTTTCATGCAGAGACTGAAAACAATAAATTTTGCAGATGCTTCCACAGGCC  
CTCACCCTGTCAACCAATCACTTCACTGCAAGGCCCTTAAAGTTTCTTACTCTACCGTTACGGATCTCGGAGAACATCTATATACCCCTGAAGAGTCAATGATAA  
ATTTTCAAGGTTCTGCCAACCAACAATAAAGTACTCCAGGAACAAGTCTTAGTATCAATTTGGTGAATCATTTGGGACTTCTGAGAAGTTCCAGAAAATAAATCAGATGGTT  
TGTAATAGTGACCGTGTGCTCAAAGAAAGCCTGGAAGGAAAGCAACCTTCAAACCCCTGAAAACACTACGCTTTGATATTGAAGGATCAGATGAAGCAGATGGAAGTAAACA

CCTCCAAGGGGAAATCCAAATTCAGCAGAACTGGCAGAAATGACATCTACTCGAAACACGGATTGCAAAAAGCAGAAAATGAATGACAGCATGGATACCTCAAACAAGGAAAGAA  
AAATGA  
>nasLar1  
ATGCCGCCCCAAAACCTCCGCGAAAAACGgcccccccgccgccccctgctgcccgggaacccccggccgcccggccccccctcTGAGGAGGACCCAGAGCAGGACAGCGGCCGAGGACCTG  
CCTCTGGTCAGCCTTGAGTTTGAAGAAAACCGAAGAACCTGATTTACTCGGTTATGTCTCAGAAATTAAGATACCCAGATCATGTCCAGAGAGAGCCTGGTTAACCTTGGAGAA  
GGTTTCATCTGTGGGATGAGTATGGGAGGTTATATCAAAAAGAAAAGAGACTGGGGGAATCTGTATCTTTATCGCAGCAGTTCAGCTAGATGAGATGCCATTCCATTTTAC  
TGAGCTACAGAAAACATGAATCATGTTCCATAAACTTAACTTACTAAAGGAAATTTGATACCAGTACCAAAGTTGATAATGCTATGTCAAGACTATTGAAGAAGTATGAT  
GTATTGTTGCACTCTCAGCAAATGGAAGGACATGTGAACCTATATATTTGACACAACCCAGCAGTTGATATCTACTGAAATAAATCTGCATTGGTGCTAAAAGTTTCTT  
GGATCACATTTTATTAGCTAAAG-----GTGTCCTTGACTATTTTAAACTCTCACCTCTGTGGTCTCAAAGAACCATATA-----  
-----GTGAAAAAGTGTATTTC-AAAAATTTTACTCTT-----  
-----GTTGAAAGCTTTCTAAACGATATGAGAATTTATCTTAAAAATAAAGATCTAGATGCAAGATTATTTTGGATCATGATAAGACTCTTCCAGACTGATTCTATAGACAG-----

GACTGTATGAAACACTATCCAAACATTAATGATGATTTTAAATTCAGCAAGTGATCAACCTTCAGAAAATCTGATTCTCTATTTTAAACTGCACAGTGAATCCCCAAAAGAACG  
ATACTGAAAAGAGTGAAGGATATAGGATACATCTTTAAAGAGAAAATTTGCTAAAAGCTGTGGGACAGGGATGTGTCGAAATTTGAATGCACAGCGATACAAACTTGGAGTTCCGCT  
GTATTACCAGGATATGAATCCATGCTTAAATCAGAAAAGAACGATTTCCATTTCAAATTTTTAGCAAACTTCTGAATGACAACATTTTTCATATGTCCTTATTGGCCTGTGCT  
CTTGAGGTTGTAATGGCCACATATAGCAGAAGTACATCTCGAAGTTGATCTTGAACAGATTTGTCTTTCCCATGGATTCTGAATGTGCTTAATTTGAAAGCCTTTGATTTTT  
ACAAAGTGAATGAAAATTTATCAAAAGCAGAAGGCACTTGAACAAGAAAATGATAAACAACCTTGAACCATGTGAACATCGAATCCCTTGCTGGCTGCAGATTT  
CACCTTTATTTGATCTTAAACAATCAAAGGACCGAGAAGGACCAACTGATCATTGATCTGCTTGTCTCTTAACTCTCCTCAGAAATAATCACACTGCAGCAGAT  
GTATCTTTCTGTAAGACTTCCAAAAGAAAAGGTTGCAGCTACACGTTGATAATTTACTGCAAAATGCAGAGACCAAACAACCTCAGCCTTCCAGCCAGAAAGCCATTGAA  
ATCTACCTCTTTTACCTGTTTTTAAAAAAGTGTATCGCGTACCTGTTACCTCGGATTAACATACACTATGTGAACCTGATGTAACCTGTGAAAGCTTACCTGAA  
ACCTTTTCCAGCACAGCTGCAGAAATGAGATGAACTCATGAGAGACAGGCATTTGGACCAAATATGATGTGTTCCATGATGGCATATGAAAGTGAAGAATATAGACCT  
AAATCAAATCTGATTAACAGCATATAAGGATCTTCCCTATGCTGTTCCAGGACATTTCAAACGTTGTTTGTATCAAAGAAGAGGAGTATGATTCTTATTGATTTCTATAACT  
CAGTCTTCATGCAGAGACTGAAAACAATATTTGCACTACGCTTCCACCAGGCCCTACCTTGTACCAATACCTCACATTCTCGAAGTCTTCAAAGTTTCTACTTCCAC  
CCTTACGGATTCTGGAAGGAACTCTATATTTACCCTTGAAGGATCCATATAAATTTACAGAAAGTCTCCAAACCAAACAATAAACTGACTCCAAGATCAAAGATCTTAGTAT  
CAATGGTTGGTAACTTTGGGAATTTGAGAAGTTCCAGAATTAACATGAGTGTGTGACAGGCACCGTGTCTCAAAGAAGTGTCAAAGGAAAGCCTCTTAAACCCG  
CTGAAAACACTACGCTTTGATATTGAAGGATCAGATGAAGCAGATGGAAGTAAACATCTCCAGGGAGTCCAAAATTTGACGAGAACTGGCAGAAATGACTTCTACTCGAAC  
ACGAATGCAAAAAGCAGAAAATGAATGATGATGGATACCTCAACAAGGAAGAATGA  
>chlSab2

ATGCCGCCCCAAAACCTCCGCGAAAAACGgcccccccgccgccccctgctgcccgggaacccccggccgcccggccccccctcTGAGGAGGACCCAGAGCAGGACAGCGGCCGAGGACCTG  
CCTCTGGTCAGCCTTGAGTTTGAAGAAAACGGAACCTGATTTACTCGGTTATGTCTCAGAAATTAAGATACCCAGATCATGTCCAGAGAGAGCCTGGTTAACCTTGGAGAA  
AGTTTCATCTGTGGATGAGTATGGGAGGTTATATCAAAAAGAAAAGAGACTGGGGGAATCTGTATCTTTATCGCAGCAGTTCAGCTAGATGAGATGCCATTCCATTTTAC  
TGAGCTACAGAAAACATGAATCATGTTCCATAAACTTAACTTACTAAAGGAAATTTGATACCAGTACCAAAGTTGATAATGCTATGTCAAGACTATTGAAGAAGTATGAT  
GTATTGTTGCACTCTCAGCAAATGGAAGGACATGTGAACCTATATATTTGACACAACCCAGCAGTTGATATCTACTGAAATAAATCTGCATTGGTGCTAAAAGTTTCTT  
GGATCACATTTTATTAGCTAAAAGGGAAGTATACAAATGGAAGTATGCTGGTGAATTTGATTCATTCAGTTAATGCTATGTGTCCTTGACTATTTTAACTCTCACCTCTGCT  
GTTGCTCAAAGAACCATATAAACCGGCTTATACCCTTAATGGTTACCTCGAACCAAGCAGGGCAGAAACAGGAGTCAAAAGTCAAGACTGATAAAGAAAGGATA  
CAAGAATATTGAAGTTCTGTAAAGAACAATGATATAGTAGAGTGGGAAAATGTTTAACTTCAAATAATTTACTTTTAACTTAAAGTCAAGACTTGAAGTGTATTTGATCATGATAAGACTTCTCAGACTGATTTCT  
GACTTCCAGAGTGTAAAGCTGTCTAAACGATATGAGAATAATTTAACTTAAATAAAGTCAAGACTTGAAGTGTATTTTAAAGTCAAGACTTCTCAGACTGATTTCTAT  
AGACAGTTTTGAAACACAGAGAACACCCGCAAAAAGTAACTTGATGAAGAGTGAATGTGATCTCCACACACTCCAGTTAGGACTGTTATGAACACTATCCAAACATTAAT  
GATGATTTTAAATTCAGCAAGTATCAACCTTCAGAAAATCTGATTCTCTATTTTAAATACTGCACAGTGAATCCAAAAGAAAGCATACTGAAAAGAGTGAAGGATATAGGATATA  
ATCTTTAAAGAGAAAATTTGCTAAAGCTGTGGGACAGGGATGTGTTGAAATTTGATCCAGCAGATACAAACTTGGAGTTCGCTTTGATTTACCGAGTAAATGGAATCCATGCTTAAAA  
TCAGAAAGAAACGATATTACCTAAAATTTAGCAAATCTGAAAGCAGTTGATGAACCAACTTTTTCATATGTCTTATTGCGCTGTGCTCTGGAGTGTGAATGCCCCATATAGCACAA  
TATCATCTCAGAATCTTGATTTGAAATGGATTTCCCTTGACTTGTGATGATGCTGTTAACTTGAAGTGTATTTTAAAGCCTTTGATTTTCAAAGTTTAACTTAAAGCAGAA  
GGCAACTTGACAAGGAAATGATAAAACACTTAGAACGATGTGAACATCGAATCATGGAATCCCTTGCAATGGCTCTCAGATTACCTTTATTTGATCTTAAACAATCAAAG  
GACCGAGAAGGACCACTGATCATTGAAATCTGCTGTGCTCTTAAATTTCTCCAGAAATAACACTGCAGCAGATATGTATCTTCTGCTGTGAAGTATCTCCAAAAGAAA  
AAGGTTCAAATACAGCTGATAAACTTACTGCAAAATGCAGAGACACAAACCTCACCTTCCAGCCTCAGAAACGATTTAAAGTCAAGACTTGAAGTCTTTTAACTTAAAGCAGT  
GTATCGCTCAGCTTATCTCGGCTAAATACACTATGTAACGCTTTATCTATGACACCAGCAACTGATTCGATTTGTTTAAAGTGTATTTTAAAGTCAAGACTTAAAGTCAAG  
TATGAACTTAGAGACAGGCATTTGAGACCAAATTTGATGTTGCTTCAAGTATGACATATGCAAAAGTGAAGAATATAGACCTTAAATCAAAGTCAAGCTTGAAGTGTAAAGTGAAGTCAAG  
GATCTTCTCATGCTGTTCCAGGACACTTAAACGTTTGTGATCAAAGAAGAGGAGTATGATTCTATTATAGTATCTATAACTCGGCTTTCATGCAAGACTGAAACAATA  
TTTTGCAGTATGCTCCACAGGCCCTACCTTGTCAACCAATCCCTCACTTCCGAAAGTCTTTACAAGTTCCTTACAAAGTCTTAAAGTCAAGACTTAAAGTCAAGCTTAAAGT  
TTTTCAACCTGAAGGACTGATAAACTTCAAGGCTTTGAGAACTCAAAACAAATGATCCTCAAGTCAAGAACTTATAGTAACTTTGAAATCAATTTGGGACTTTGGGACTTCTGATA  
AGTTCCAGAAAATAAATCAGATGTTGTAACAGCAGCCGTTGTCTCAAAGAAGTGTGAAAGGAGCAACCCCTCTAAACCACTGAAAACACTACGCTTTGATATTGAAGGA  
TCAGATGAAGCAGATGGAATTAACGCTCCAGGGGAGTCCAAAATTTGACGAGAACTGGCAGAAATGACTTCCACTCGAACCAAGTGAAGAAGCAGAAAATGAATGATA  
GCATGGATACCTCAACAAGGAAGAATGA  
>salBol1

ATGCCGCCCCAAAATGCCCGAAAAA--gcccgcgcgcgccccctgctgcccgggaacccccggccgcccggccccccctcTGAGGAGGACCCAGAGCAGGACAGCGGCCGAGGACCTGCCTCTGGTCAGGGTTGAGTTTGAAGAACTGAA  
gcccgcggAACCCACAGCAGCCGCTCCGCTTCTCCTGAGGAGGACCCAGAGCAGGACAGCGGCCGAGGACCTGCCTCTGGTCAGGGTTGAGTTTGAAGAACTGAA  
GAACCTGATTTTACTGGGTTATGCTAGAGATTAAGATACCCAGATCATGTCCAGAGAGAGCTTGGTTAACTTGGGAAAGTTTCATCTGTGGATGGAGTATTGGGAGGTTA  
TATTCAAAGAAAAGGAACTGTGGGAACTGTATCTTTATGCAAGCAGTTACCTAGATGAGATGCGCTTCACCTTTACTGAACTACAGAAAATCATAGAAAATCAGTGTCTTT  
AAATTTCTTGAATTTAAAGAAAATGATAACAGTACCAAGTTGATAATGCTATGTGCAAGACTGTGAAAGGATTAATGATATTATGGCAGCTCTCAGCAAATTAGAAAGGA  
CATGTGAACCTATATTTGACACAACCAAGTTCGATATCTACTGAGATAAATCTGCATTTGGTTGCTCAAAGTTCCTTGGATCACTTTTAACTGAGTAAAGTGTGAAAGG  
ACAAATGAAAGATGATCTGGTGAATTTCACTTGTATGCTATGTTGCTTACTATTTAACTCTCACCTCCTGTTGCTCAAAGAACATATAAAACAGCTGTATAAC  
CCGTAAATGGTTCCACTGACCCAGCGAGGTCAAGAACGGGACTGACAGCACTTGAAGTTCGATTTAACTCAAGGAACTGAAAGTATGAAATTTCTGTAAAGAACGATAA  
TGTAATATGATGAGGTTGAAAATGTTTATTAAAAATTTTAACTTTTATGAATTTCTTGACTTTGAATCTAATGGACTTCCAGAGGTTGAAAGTGTGCTAAACGATA  
CGAAAGAAATTTATCTTAAAAATTAAGATCTAGATGCAAGATTTTGGATCATGATAAACTCTCAGACTGATTTCTATAGACAGTTTTGAAGCAGAGAACACCAAGAAAA  
AGTAAACCTTGATGAAGAGGTTAATGATTTTCCACACACTCCGCTTCCGCTGATGAAACGATTTGAACACTATCCAAACAAATTAAGTATGTTTTAAATCAGCAAGTGTACGCCATCA  
GAAAATCTGATTTGCAATTTTAAACACTGCACAGTAAATCCAAAAGAAAGTATTGAAAAGAGTGAAGGATTTGGATACATCTTTAAAGAGAAAATTTGCTGAAGCTGTGGCAG  
AGGATGTGTTGAAATTTGGACTCAGCAGGATCAAACTTTGGAGTTGCTGTATACCGAGTAAATGGAAATCCGCTTAAATCAAAGAAGAACTATCCATTTCAAAATTTTA  
GCAAATCTTAAACGACAGCATTTCATATGTCTTATTTGGCTGTGCTCTTGGAGTTGTAATGGCCACATATAGCAGAAGCACTTCCAGAACTTTGATTCTGGAACAGATT  
TGCTCTCCCATGGATTCTGAATGTGCTTAAATTTAAAGCCTTTGATTTTCAAAGTGTGAAAGTTTTTCAAAGGATAACAAAGCAGAAAGTGAATAAACTTT  
AGAACGATGTGAACATCGAATTTGAAGTCCCTTCCGCTCTCAGATCACTTTTGTGCTTATTAACAATCAAAGGACCCGAGAAGGACCAACTGATCACCTTGAATC  
TGCTTGTCTCTTAAATGCTCTCAGAAATAATCACACTGAGCAGATATGATCTTTCTCTCAGTAAAGTCCCAAAGAAAAGGTTTCCAGCTCAGCTGTAATCTCATCTCACTGCA  
AATGCAAGACACAAGCAACCTCACAGCTTCCAGCCAGAAAGCATTGAAATCTTACCTCTCTTCTCACTGTTTATAAAAAGTGTATTCGCTAGCTTATCTCCGCTTAATACG  
CTGTGTGAACGCTTCTGCTGAGCACCAGAACTAGAGCATATCATCTGGACCTTTTCCAGCACAGCTGCAGAAATGAATATGAACTTATGAGAGACAGGCATTTGGACCA  
AATATGATGTGTTCCATGATGGCATAATGCAAGTGAAGAATAAGACCTTTAAATCAAATCATTGTAACAGCATAACAAGATCTTCTCCATGCTTGTTCAGGAGACTTCAA  
CGTGTGTTTTGATCAAAGAGAGAGTGAATTTCTATTAAGTATTCTAATCACTAGCTTCACTGACTTCAAGTCAAGTCAAGTAAATTTTTGCGATTTGCTTCCCAAGCCCTACCT  
GTCACCAATACCTCACATCTCCTGAAAGCCTTACAAGTTTCTAGTTACCTTACGGATTTCTGGAAGGAAACTCTATATACCCTGAAAGGATCAATATAAATTTTCAAG  
AAGGTCGCAACCAACAATAAATGACTCCAGGAACAAGAATCTTAGTAACTCAATTTGGTGAATCTTTGGAACTTCTGAGAAGTTCGAAGAAATTAATCAAAGTTTTGATAAC  
GTGACCGTGTGCTAAAAGAGGCGTGAAGGAAGCAACCTCTAAACCGCTGAAAAACTACGCTTTGATATCGAAGGATCAGATGAGCAGATGGAAGTAAACCTCCA  
AGGGGAGTCCAAAATTTAGCAGAAACTGGCAGAAATGACATCTACTCGAAACAGAAATGCAAAAAGCAGAAAATGAATGACAGCATGGATACCTCAACAAGGAAGAAAATGA

>papAnu2  
ATGCCGCCCCAAAACCTCCGCGAAAAACGgcccccccgccgccccctgctgcccgggaacccccggccgcccggccccccctcTGAGGAGGACCCAGAGCAGGACAGCGGTCGCGAGGACCTGCCTCTGGTCAGGGTTGAGTTTGAAGAAACCG  
cccgccgcgcgctgcccgcggaaacccccggccgccccctgctgcccgggaacccccggccgcccggccccccctcTGAGGAGGACCCAGAGCAGGACAGCGGTCGCGAGGACCTGCCTCTGGTCAGGGTTGAGTTTGAAGAAACCG  
AAGAACCTGATTTACTGCGTTATGTCAGAAAATAAGATACCCAGATCATGTCCAGAGAGAGACTTGGTTAACTTGGGAAAGTTTCATCTGTGGATGGAGTATTGGGAGGTTT  
atfcaaaagaaaaggaactgtGGGGAATATGATCTTTTATGCAAGCTGTGACTAGATGAGTGCATCTTACTGAGCTACAGAAAACATAGAAAATCAGTGTCCATAATTT  
TTTTAACTTAAAGGAAATGATACCTAGTACCAAAGTTGATGACTTGTCAAAGACTATGAAGAAGTATGATGATTTGTTGCACTCTCAGAAAAGTAACTTGAAGGAGacATGTTGA  
ACTTATATATTTGACACAACCCAGCAGTTGATATCTACTGAAATAAATTTGATCTTAAAGTGTCTTGGATCACATTTTATTAGCTAAAG-----

AAACAGCTGTTATCCCATTAATGGTTACCTGCAACCCAGGGCAGGCGGAGCAGGAGTGCAGGATGagcaaaacaactagaaaaatgTACAGAATAATTGAAGTTCTCTGTAA  
AGAACATGAAATGATAATAGATGAGTgtaaaaatgttattcaaaaatattaccctTTTATGAAATCTCTTTGGACTTGTAACTTAATGGACTTCCAGAGGTTGAAAGCTGTCTAAACGATAT

GAgaaaatttatcctaaataaagactTAGATGCGAAGATATTTTTGGATCATGATAAGACTCTTCAGACTGATTCTATAGACAGTttgaacacacagagaacaccgcGAAAAAGTAACTTTGATGA  
AGAGGTGAAGTGGATTCCTCCACACACTCCAGTGTAGGACTGTTTATGAACACTATCCAAACAAATTAATGATGATTTAAATTCAGCAAGTGATCAACCTTCAGAAAACTGATTTCC  
TATTTTAATAACTGCACAGTGAATCCAAAAGAAAGCATACTGAAAAGAGTGAAGGATATAGGATACATCTTTAAAGAGAAATTTGCTAAAGCTGTGGGACAGGGATGTGTGCGAA  
ATTGGATCACAGcGATACAAAACCTGGAGTTCCGCTTGATTTACCGAGTGATGGAAATCCATGCCTAAATCAGAAAGAAAGAACGATTATCCATTCCAAaatttagaacaacTTCTGAAATGACaac  
atthttcatatgtctTATTTGGCGTGTCTCTTGAGGTTGTAATGGCCACATATAGCAgaaGTAACACTCAGAGAGCTTTGATTTGGAACAGATTGTCTTTCCATCGGATTCGAATGTGCT  
TAAATTTGAAGCCTTTGATTTTTACAAAGGATTTGAAAGTTTTATCAAAGCAGAAAGGCAACTTGACAAGAGAAATGATAAAACACTTGAAGACGATGTGAAGACTCGAATCGAATCGAA  
TCCTTTGAACCTCTCAGATTCACTTTATTTGATCTTTAAACAAATCAAAGCAGGACCACTGATCACTTTGAACTGTGCTTTAACTCTTAACTCTCTCCAGAT  
ATAATCACACTGCAGCAGATATGTATCTTTCTCTGTAAGatctcaagaaaaaagggtCAACTACACGTGTAATTTCTACTGCAAAATGACAGAGACAcaagcaacctcagctccagaccGAGA  
AGCCATTGAAATCTACCTCTCTTTACTGTTTTATAAAAAGTGATCGGCTAGCCTATCTCCGGCTAAATACACTATGTGAACGCCCTTCTACTGAGCACCCAGAAGCTAGAAC  
ACATCATCTGGACCCTTTCCAGCATACGCTGCAGAAATGAGATGAAGTAAAGCTAGTGAGAGACAGGCTTTGGACCAAATTTAGATGTGTCCTATGATGGCATATGCAAAAGTGAAG  
AATATAGACCTTAAATTTAAAATCATCGTAACAGCATACAAGGATCTTCTCATGCTGTTCCAGGAGACATTCAGAACTGTTTTGATCAAAGAAAGGAGATGATTCTTATTATAG  
TATTTATAACTCGGTCTTCATGCAGaagctgaaaaaaatthttgagTATGCTTCCACAGGCCCTACCTTGTCACCAATACCTCACATTTCTCGAAGTCCTTACAAAGTTCCCTAG  
TTCCGCTTACGGATTCTCGGAGGAACATCTATATTACCCTGAAGAGTCCATATAAAATTTCCAGAAAGGCTGCCAACCAACAGAAATgactccaagatcaagAATCTTAGTA  
TCAATTTGGTGAATCTTTGGGACTCTGAGAAGTCCGAAAAATAATCAGATGGTGTGAACAGCGACCCTGTCTCAAAGAAAGTGTGAAGGAAAGCAACCCTTCAAACTG  
GCTGAAAAAATACGCTTTGATTTGAAAGATCAGATGAAGCAGATGAAAGGAAIAAACTCCTCCAGGGAGTCAAATTTAGCAGAAAACTGGCATTTGATTTCCACTCGAA  
CACGAatgcaaaagcagaaaatgaATGATAGCATGGATACCTCaacaaggaagaaatga

>hg38

ATGCCGCCCCAAAACCCCGGAAAAACGgcgcccaccgcccgcgctgcccgcgggaacccccgcgaccgcccgcgccccctccTGAGGAGGACCAGAGCAGGACAGCGGCCGGAGGACCTG  
CCTCTCGTCAGGCTTGAGTTTTGAAGAAACAGAAAGAACTGATTTACTGCTTATGTGCGAAATTAAGATACCAGATCATGTGACAGAGAGAGCTGGTTAACTTTGGGAGAAA  
TTCTTACTTTGAAGTTCTCTGTAAGAACTGAATGTAATATAGATGAGGGAAGAAATGTTATTTTCAAAAATTTTATACCTTTTATGACCTTTTACTTTTCACTTTTACT  
GAGCTACGAAAACATAGAAATCAGTGTCCATAAATCTTTAACTTACTAAAAGAAATGATACCAGTACCAAAGTTGATAATGCTATGTCAAGACTGTTGAAGAAATGATGAT  
TATTTTGAACCTCTCAGCAAATGGAAAGGACATGTGAACCTTATTAATGTAAGAGGTGAATGTAATTTCCACACACTCCAGTTAGGACTTTGATGAACTTTGAACTTTGATG  
GATCACATTTTATAGCTAAAGGGAAAGTATTACAAATGGAAGATGATCTGGTGAATTTCAATTCAGTTAATGCTATGTGCTTACTATTTTAACTCTCACCTCCATGT  
TGCTCAAAGAACCATATAAAACAGCTGTTATACCCATTAATGGTTCACTCGAACCCAGCCAGGCTGAGAACAGGAGTGCACGGATAGCAAAAACACTAGAAAATGATGA  
AGAAATTTGAAGTTCTCTGTAAGAACTGAATGTAATATAGATGAGGGAAGAAATGTTATTTTCAAAAATTTTATACCTTTTACTTTTACTTTTACTTTTACTTTTACT  
ACTTCCGAGAGTTGAAAACTTTCTAAACGATACGAAAGAAATTTATCTTAAAAATAAGATCTAGATGCAAGATATTTTGGATCATGATAAAACTCTCAGACTGATTTATG  
ACAGTTTTGAACACAGAGAACAATAAACTTGAACAGTGTGAACATCGAATGTAATGTAATTTTCCACACACTCCAGTTAGGACTTTGATGAACTTTTAACTTTTAACTTTG  
TGATTTTTAAATTCAGCAAGTGTCAACCTTCAGAAAATCTGATTTCTTATTTAACTGCACAGTGAATCCAAAAGAAAGTATACTGAAAAGAGTGAAGGATATAGGATACAT  
CTTTAAAGAGAAATTTGCTAAAGCTGTGGGACAGGTTGTGTCGAAATTTGGATCAGCAGGATCACTTTGAGAACTTTGAGAACTTTGAGAACTTTGAGAACTTTGAGAACTTTG  
AGAAGAAGAACTTACCTTTCAAATTTAGCAAACTTCTGAAGTGAACATTTTTTCAATGCTTATTGGCGTGGCTTTGAGGTTGTAATGGCCACATATAGCAGAAGT  
ACATCTCAGAACTTTGATCTGGAACAGATTGTCTTTCCCATGATTCGAATGTGCTTAAATTTAAAAGCTTTGATTTTCAAAGTGAATGCAAAAGTTTATCAAAGCAGAA  
GCAACTTGAACAGAAATGATAAACTTGAACAGATGTGAACATCGAATGTAATGTAATTTCCAGCTTCAGATTCACTTTTATTTGATCTTTTAACTTTTAACTTTTAACTTTG  
CCGAGAAGGACCACTGATCACCTTGAATCTGCTTGTCTCTTAACTTCTCTCCAGAATTAATCACACTGCAGCAGATATGTATCTTTCTCTGTAAGATCTCCAAAGAAAA  
AGGTTCAACTACCGCTGTAAATTTACTGCAATGCGAGACACAAGCAACTCAGCCCTCCAGCCAGGAAGCCATGAAATCTACCTCTCTTCACTGTTTTATAAAAAAGT  
GTATCGGCTAGCCTATCTCCGGTAAATACACTTTGTGAACGCCCTCTGCTGAGCACCCAGAAATGAAACATATCATCTGGACCTTTTCCAGCAGCACCTGCAGAAATGAGT  
ATGAACCTAGAGAGCAGGCACTTTGGACAAATTTAGTGTGTCATGATGGCATATGCAAAGTGAAGAAATAGACCTTAAATCAAATCATGTAACAGCATACAAAGG  
GCTTCTCCTACTGTTCAGGAGACCTTCAACCTGTTTTGATCAAAGAAAGAGGAGTGTGATTTAGTATTCTATAAAGTGTGTAAGTGTGTAAGTGTGTAAGTGTGTAAGTGTG  
TTTGCAAGTATGCTTCCACCAGGCCCTACCTTGTCAACAACTCACATTTCTCGAAGCCCTTCAAGTTTCTAGTTCACCTTACCGATTCTCGGAGGAAACATCTAT  
TTCCACCCCTGAAGAGTCCATATAAAATTTCCAGAAAGTGTGCCAACCAAAAGAAAGTGTGCTCAAAGAAAGTGTGAAAGAAAGCAACCCCTCAAACTGAAAAAACTACGCTTTGATTTGAAGG  
TTCCAGAAAAATAAATCAGATGGTATGTAAACAGCGACCCTGTGCTCAAAGAAAGTGTGCTCAAAGAAAGTGTGAAAGAAAGCAACCCCTCAAACTGAAAAAACTACGCTTTGATTTGAAGG  
CAGATGAAGCAGATGGAAGTAAACATCTCCAGGAGAGTCCAATTTCCAGCAGAACTGGCAGAAATGACTTCTACTCGAACACGAATGCAAAAGCAGAAAAATGAATGATAGC  
ATGGATACCTCAAAACAGGAAGAAATGA

>macFas5

ATGCCGCCCCAAAACCCCGGAAAAACGgcgcccaccgcccgcgctgcccgcgggaacccccgcgaccgcccgcgccccctccTGAGGAGGACCAGAGCAGGACAGCGGTCGGGAGGACCTG  
CCTCTCGTCAGGCTTGAGTTTTGAAGAAACAGAAAGAACTGATTTACTGCTTATGTGCGAAATTAAGATACCAGATCATGTGACAGAGAGAGCTGGTTAACTTTGGGAGAAA  
AGTTTCATCTGTGGATGGAGTTTGGAGGTTTATTTCAAAGAAAAAGAAAGTGGGAAATATGTATCTTTTATGACGACAGTGAACCTAGATGAGATGCCATTTCACTTTACT  
TGAGCTACGAAAACATAGAAATCAGTGTCCATAAATCTTTAACTTACTAAAAGAAATGATACCAGTACCAAAGTTGATAATGCTATGTCAAGACTTGAAGAAATGATGAT  
GTATTTGTTGCACTCTCAGCAAATGGAAAGGACATGTGAACCTTATATAATTTGACACAACCCAGCAGTTCGATATCTACTGAAATAAATTTACTATTGTTGCTAAAAGTTCTT  
GGATCACATTTTATAGCTAAAGGGGAAATATAACAAATGGAAGATGATCTGGTGAATTTCAATTCAGTTAATGCTATGTGTGCTTACTATTTTAACTCTCACCTCCGCT  
TTGTCTCAAAGAACCATATAAAACAGCTGTTATACCCATTAATGGTTCACTCGAACCCAGGCCAGAACAGGAGTGCACGGATAGCAAAAACACTAGAAAATGATA  
CAAGAATTTGAAGTTCTCTGTAAGAACTGAATGTAATATAGATGAGGTTGAAAAATGTTATTTCAAATAAATTTTATACCTTTTATGAAATCTCTTGGACTTTGAACTTCTAATG  
GACTTCCAGGTTGAAAGCTGTCTAAACGATATGAAGAAATTTATCTTAAAAATAAGATCTAGATGCAAGATATTTTGGATCATGATAAAGCTTTTCAAGCTTTCAAGCTGATTTCT  
AGACAGTTTTGAAACACAGAGAACAACCCCGAAAAAGTAACTTGTAGAGAGGTGAATGTGATTTCTCCACACTCCAGTTAGGACTGTTATGAACTATCCAACAATTAAT  
GATGATTTTAAATTCAGCAAGTGAATCAACCTTCAGAAAATCTGATTTCTTCTTATAAATACTGCACAGTGAATCCAAAAGAAAGCACTAGTGAAGAAAGTGAAGGATATAGGATAC  
ATCTTTAAAGAGAAATTTGCTAAAGCTGTGGGACAGGATGTGTGCAAAATTTGATCAGCAGCAGCACTGAGAACTTTGAGGTTGTTATTTACCGAGTAATGGAAATCCAGTTCTTAA  
TCAGAAAGAAACGATTTACCTTCAAAATTTTAGCAAACTTCTGAATGACAACATTTTTTCAATGCTTATTTGGCGTGTGCTCTTGGAGTTGTAATGGCCACATATAGCAGAA  
GTACATCTCAGAATCTGATTTGATCTGGAACAGATTGTCTTTCCCATGATTTGCTTTGAACTTGAATTTTCAAAAGCTTTGATTTTCAAAGCTTTTGAATTTTAACTTTAACTTTG  
GGCACTTGACAAGAGAAATGATAAAACACTTAGAACGATGTGAACATCGAATCATGGAATCCCTTGCAATGGCTCTCAGATTCACTTTATTTGATCTTTAAACAATCAAAG  
GACCCGAAAGGACCAACTGATCACTTTGAACTGCTTGTCTCTTAACTTCTCCAGAAATTAATCACACTGCAGCAGATATGTATCTTTCTCTGTAAAGATCTCCAAAGAAA  
AAAGGTTAAAGCAACCTGATCAATTTCTACTGCAATGCGAGACACAAGCAACTCGACTCCAGACCCAGAAAGCCATGAAATCTACCTCTTCTCACTGTTTTTAA  
GTATCGGCTAGCCTATCTCCGGCTAAATACACTATGTGAACGCCCTCTATGTAACAGCCTTCTACTGACCCACCAAGTGAAGAAATAGACCTTAAATCAAATCATGTAACAGCATACAAAGG  
TATGAACCTCATGAGAGCAGGCTTTGGACAAATTTAGATGTGTTCCATGTATGGCATATGCAAAAGTGAAGAAATAGACCTTAAATCAAATCATGTAACAGCATACAA  
GGATCTTCTCATGCTTTCCAGGACATTCAAACGTTTTGATCAAAGAAAGGAGTATGATTTCTATTAAGTATTCTATAAAGTGTGTAAGTGTGTAAGTGTGTAAGTGTGTAAGTGTG  
ATTTTGCAGTATGCTTCCACCAGGCCCTTACCTTTGTCAACAACTCACATTTCTCGAAGTCCCTCAAAGTTCTTAGTTCGCCCCCTACGGATTCTCGGAGGAAACATCTAT  
ATTTACCCCTGAAAGATGCCATATAAAATTTAGAAAGGTTCTGCCAACCCACCAAGTGTGCTCAAAGAAAGTGTGCTCAAAGAAAGTGTGAAAGAAAGCAACCCCTCAAACTGAAAAAACTACGCTTTGATTTGAAGG  
AAGTTCCAGAAAAATAAATCAGATGGTGTGAACAGCGACCCTGTGCTCAAAGAAAGTGTGCTCAAAGAAAGTGTGAAAGAAAGCAACCCCTCAAACTGAAAAAACTACGCTTTGATTTGAAGG  
ATCAGATGAAGCAGATGGAAGTAAACATCTCCAGGAGAGTCCAATTTCCAGCAGAACTGGCAGAAATGACTTCTACTCGAACACGAATGCAAAAGCAGAAAAATGAATGATGA  
GCATGGATACCTCAAAACAGGAAGAGAAATGA

>nomLeu3

ATGCCGCCCCAAAACCCCGG-  
AAACGgcgcccaccgcccgcgctgcccgcgggaacccccgcgaccgcccgcgccccctccTGAGGAGGACCAGAGCAGCGGCCGGAGGACCTGGCTCTCGTACGCTTGAGTTTT  
GAAGAAACAGAAAGACTGATTTACTGCTTATGTGCGAAATTAAGATACCAGATCATGTGACAGAGAGAGCTTGGTTAACTTTGGGAGAAAGTTTCATCTGTGGATGGAGT  
ATTTGGGAGGTTATTTCAAAGAAAAAGAACTGTGGGAACTGTATCTTTATGACGACAGTGAACCTAGATGAGATGCCGTTCACCTTTACTGAGCTACAGAAAAACATAGA  
AATCAGTGTCCATAAATCTTAACTTACTAAAAGAAATGATACCAGCACAAGTTGATAATGCTATGTCAAAGACTGTTGAAGAAAGTATGATGATTTGTTGCACCTTCGAC  
AAATTTGAAAGGACATGTAACCTTATATAATTTGACACAACCCAGCAATCTACTGAAATAAATTTGCAATTTGGCTTTGTTGCTTAAAGCTTGTATGATGATTTTAACTTTAGCCTAA  
AGGAGAAGTATTACAAATGGAAGATGATCTGTTGATTTTCAATTTGACTGTGCTCTGACTGATTTTAAACTCTCACCTCGTGTGCTGCTCAAAGAAACATTAATA  
ACAGCTTTTAACTTAAAGTTTCACTCGAACCCAGCCGAGGTGCAAGCAAGGACCGGACTTAGCAGGATAGCAAAACAACTAGAAATGATGCAAAAGTATTAAAGTATTTAACTTTCTCTG  
TAAAGAACATGAATGTAATATAGATGAGGTGAAAAATGTTATTTCAAATAAATTTTAACTTTTATGAATTTCTTGGACTTGAACATCTAATGGACTTCCAGAGGTTGAAAGTC  
TGCTTAAACGATATGAAGAAATTTATCTTAAAAATAAGATCTAGATGCAAGATTTTGGATCATGATAAACTTCCAGACTGATTTATAGACAGATTTTGAACACAGAGA  
ACCCAAGAAAAAGTGAACCTTGAAGAGGTTGAATTTCTCCACCACTCCAGTTAGGACTGTTATGACCAATTAAGTGAATGATTTAAATGATTTAAATTTGAACTTTCAAGAAAT  
GATCAACCTTCAGAAATCTGATTTTCTTAACTTCAACCTGCACAGTGAATCCAAAAGAAAGTGAAGGATATAGATACATCTTTAAAGAGAAATTTGCTA  
AAGCTTGGGACAGGATGTGTCGAAATTTGGATCACAGCATCAAACTGGAGTTGCTTGTATTTAACTGAAATGGAATCCATGCTTAACTCAAGAAAGAAAGGCAACTTATCC  
ATTCAAAATTTAGCAAACTTCTGAATGACAACGTTTTTCAATATGCTTTTATGGCATGCGCTCTTGGATTTGATGATTTGACACATATAGCAGAAGTACATCTCAGAATCTTGATT  
CTGGAACAGATTTGCTTTCCCATGGATCTGAAATGTGCTTAAATTTAAAGCTTTGATTTTCAAAGTGAATGAAAGTTTATCAAGGCAGAAAGGCACTTGCACAGAGAAAT  
GATAAAACATTTGAACAGTGTGAACATCGAATCATGGAATCCCTGATGCTCTCAGATTTGCTTTATTTGATCTTTTAAACAACTAAAGAAATTTAAATTTAACTTTGAACTTTCTG  
TCACTTTGAAATCTGCTTGTCTGTTAACTTCTCAGAAATAACACTGCAGCAGATATGATCTTTCTCTGTAAAGATTTCAAAGAAAAAGGTTTCAACTCCGCTGTA  
AATTTCTGCAAAATGAGAGCAACGAACCACTGCACTTCCAGAAATCAACACTGCAGCAGATGATGATCTTTCTCTGTAAAGATTTCAAAGAAAAAGGTTTCAACTCCGCTGTA  
CGGCTAAATACACTTTGTGAACGCCCTTCTGCTGAGCACCCAGAACTAGAACACATCATCTGGACCCCTCTCCAGCATACCTGCAGAAATGAGTATGAACCTCATGAGAGACG  
GCATTTGGACCAAAATTTGATGTTCCATGTATGGCATATGCAAAAGTGAAGAAATATAGACCTTAAATTTCAAATCATTGTAACAGCATACAAGGATCTTCTCATGCTGTTCCAG

GAGACATTCAACCGTGTGTTTATGATCAAGAAGAGGAGTATGATTCTATATAGTATTCTATAAACCCTGCTTCCATGCAGAGACTGAAAAACAATATTTTGCAGTATGCTTCCACCA  
GGCCCCACCTTTGCCAATCCCTCACATTCCTCGAAGCCCTATAAGTTTCCTAGTACCCTTACGGTATTCCTGGAGGGAAACATCTATATTTACCCTCGAAGAGTCCAT  
ATAAAATTTCCAGAAGGTCTGCCAACCAACAAAAATGACTCCAAGATCAAGAATCTTAGTATCAATTTGGTGAATCATTTGGGACTTCTGAGAAGTTCCAGAAAAATAATCAGAT  
GGTATGTAAACAGCAGCCGTGTGCTCAAAGAAAGTGTGAAAGGAAACCAACCTTCAAACCACTGAAAAAACTACGCTTTGATATTTGAAGGATCAGATGAAGCAGATGGAAGT  
AAACATCTCCAGGAGAGTCCAAATTTCCAGCAGAAACTGGCAGAAATGACTTCTACTCGAACACGAATGCAAAAGCAGAAAAATGAATGATAGCATGATACCTCAAACAAGGA  
AGAAAAATGA

>ponAbe2

ATGCCGCCAAAACCCCGAAAAACGgcccgcacccgctgcccgtgcccgcggaaaccocccagcaccgcccgcgcccCCCTCTGAGGAGACCAGCAGGACAGCGGGCCGGAGGACC  
TGCCCTCTCGTCAGGCTTGTAGTTTGAAGAAAACAGAAACCTGATTTTACTGCGTTATGTCAGAAAATTAAGATACCAGATCATGTCAGAGAGAGAGCTTGGTTAACTTGGGAG  
AAAGTTTCACTCTGTGGATGGAGTATGGGAGGTTATATTCAAAAGAAAAAGAACTATGGGGAATCTGTTATCTTTATTGCAGCAGTTGACCAAGATGAGATGCCGTTCACTTTT  
ACTGAGCTACAGAAAAATATAGAAATCAGTGTCCATAAATCTTTAACTTACTAAAAGAAATCGATACCAGTACCAAAGTTGATAATGCTATGTCAGAGACTGTTGAAGAAATGATG  
ATGATTTGTTGCACTCTTCAGCAAAATGGAAAGGACATGGAACCTATATATTTGACACAACCCAGCAGTTCGATATCTACTGAAATAAATCTTCATTTGGTGTCAAAAGTTCT  
TTGGATCACATTTTTATAGCTAAAGGGGAAGTATTACAAATGGAAGATGATCTGGTATTTCACTTTCAGTTAATGCTATGTGCTTGTACTATTTTTAACTCTCACCTCCCG  
TGTTGCTGAAAGAACCATATAAAACAGCTGTATACCCATTAAATGGTTCACTCGAACACCCAGGCGAGGTGAGAACAGGAGTGCACGGATAGCAAAACCACTAGAAAATGAT  
ACAAGAATTTTGAAGTCTCTCGTAAAGAACATGAATGTAATATAGATGAGGTGAGGTAAGAAATGTTTTATTCAAAAATTTTTATACCTTTTATGAATTTCTTTGGACTTCACT  
GGACTTCCAGAGGTTGAAAGTCTGTCTAAACGATATGAAGAAATTTATCTAAAAATAAGATCTAGATCCAAGATTTATTTTGGATCATGATAAACTCTCCAGACTGATTA  
TAGACAGTTTTGAACACAGAGAACACCACCTTAACTTGAAGAGGTGAAATTAATCTCCACACACTCCAGTTAGGACTGTTTATGAACACTTCCAAACATTTAA  
TGATGATTTAAATTCAGCAAGTATCAACTTCAGAAAATCTGATTTCTATTTTAACTGCACAGTGAATCAAAGAAAGTATACTGAAAAGAGTGAAGGATATAGGATA  
CATCTTTAAAGACAAATTTGCTAAAGCTGTGGCAGAGGATGTGTCGAAATTTGGATCACAGCAGATACAACTTGGAGTTGCTTGTATTTACCAGATGATGAAATCCATGCTTAA  
ATCAGAAGAAGAACGATTTCACTTCAAAATTTTACCACTTTGTAACGCTTCTGATGACAACTTTGCTATGTCAGGCTTGGACTTTTCAAGGCTTCCAGCCACCTGAGCAATGA  
AGTACATCTCAGAATCTTGTCTGGAACAGATTTGTCTTTCCATGGAATCTGAATGTGCTTAAATTTAAAGCCCTTTGATTTTTACAAAGTATTGAAAGTTTATCAAAGCAGA  
AGGCAACTTGAACAAGAAATGTAAGAACTTTAGAACGATGTAAGAAAGAGGATGATGATTTTAACTTTCAGATTCAGATTTCACTTTTAACTTATTAAGAACTCAAAG  
GACCGAGAAGGACCACTGATCACTTGAATCTGCTTGTCTTAACTTCTCCAGAATAATCACACTGCAGCAGATATGATCTTTCTCTGTAGATCTCAAAGAAG  
AAAGGTTCAACTACAGTGTAAATTTACTGCAAAATGCAGAGACACAAGCAACTCAGCCTTCCAGACCCAGAAGCCATTGAAATCTACCTCTCTGCTGCTGTTTTAAAAAA  
GTGATCCGCTCAGGCTTGTGAACTTCAAAATTTTACCACTTTGTAACGCTTCTGCTGAGCAGCAGGATGACAACTTGAACACATCATCTGAGCCCTTCCAGCCACCTGAGCAATGA  
GTATGAACCTCATGAGACAGGCTTTGGACCAAAATATGATGTGTTCCATGATGATGATGCAAAATGCAAAATGCAAAATGCAAAATGCAAAATGCAAAATGCAAAATGCAAAAT  
GGATCTTCTCAGCTGTTCAGGAGACTTCAAACCTGTTTTGATGTAAGAAAGAGGATGATGATTTTAACTTATAGTATTTCTATAACTCGGCTCATGAGCAGACTGAAAAACAA  
ATTTTGCAGTATGCTTCCACCAGGCCCTACCTTGTCCAACTACCTCACATTCTCGAAGCCCTTACAAGTTTCTAGTTCACCCTTACGGATCTCTGGAGGGAACATCTAT  
ATTTCCACCCCTGAAGAGTCCATATAAAATTTTCAAGAGTCTGCGGACCAACAAGAAATGACTCCAAAGTCAAGAAATCTTAGTATCAATTTGGATCATTTGGGACTTCTGAG  
AAGTTCAGAAATTAATCAGGTTGTGAACAGCCAAAGTGTCTCAACAAAGAAAGTGTGAAGGAAGCAACCTTCAAACCGCTGAAAAAACTACGCTTTGATTTGAAGG  
ATCAGATGAAGCAGATGGAAGTAAACATCTCCAGGAGAGTCCAAATTTCCAGCAGAAACTGGCAGAAATGACTTCTACTCGAACCAAGTCAAAAGCAGAAAAATGAATGATA  
GCATGGATACCTCAAACAAGGAGAAATGA

>rhMac3

ATGCCGCCAAAACCCCGAAAAACGgcccgcacccgctgcccgtgcccgcggaaaccocccagcaccgcccgcgcccCCCTCTGAGGAGACCAGCAGGACAGCGGTCCGGAGGACC  
TGCCCTCTCGTCAGGCTTGTAGTTTGAAGAAAACAGAAACCTGATTTTACTGCGTTATGTCAGAAAATTAAGATACCAGATCATGTCAGAGAGAGAGCTTGGTTAACTTGGGAG  
AAAGTTTCACTCTGTGGATGGAGTATGGGAGGTTATATTCAAAAGAAAAAGAACTATGGGGAATCTGTTATCTTTATTGCAGCAGTTGACCAAGATGAGATGCCGTTCACTTTT  
ACTGAGCTACAGAAAAATATAGAAATCAGTGTCCATAAATCTTTAACTTACTAAAAGAAATGATAGTACTGAACTTATAAGTACTGAACTTATAAGTACTGAACTTATAAGTACTG  
ATGATTTGTTGCACTCTTCAGCAAAATGGAAAGGACATGGAACCTATATATTTGACACAACCCAGCAGTTC-----  
GGAAGTATTCAAATGGAAGATGATCTGGTGTATTCATTTAGTAACTGATGTTGCTTACTTATTTAACTTCACTCTCTGTTGCTCAAAGAACCATATAAAAA  
GCTGTTTATACCCATTAATGGTTCACTCGAACACCCAGGCGAGGCCAGGAGTGCACGGATAGCAAAAACCACTAGAAAATGATACAAGAAATTTTGAAGTCTCTGTAA  
AGAACATGAATGTAATATAGATGAGGTGAAAAATGTTTATTTCAAAAATTTTAACTTTTATGAAATCTCTTGGACTGTAAACATCTAAATGGACTCCAGAGGTTGAAAGTCTGT  
TCAAACGATATGAAGAAATTTCTTAAATAAAGATCTAGATGCAAAAGTATTTTGGATCTTAAAGACTCTCAGACTGATTTCAATGAGACTGTTGAAACACAGAGAA  
CCGCGAAAAAGTAACTTGTAGAGAGGTGAATGTGATTCTCCACACACTCCAGTTAGGACTGTTAAGAACACTTCAAACAATTAATGATGATTTAAATTCAGCAAGTTAT  
CAACTTCAGAAAAATGATTTTCTTAAATTAACGTGCAGAGTGAATCCAAAAGAAAGCAACTACTGAAAAGAGTGAAGGATATAGGATACATCTTAAAGAGAAATTTGCTAAAG  
CTGTGGGACAGGATGTGCGAAATTTGGATCACAGCAGTACAACCTTGGAGTTGCTTTGATTTACCGGATTAAGGAAATGGAATCCATGCTTAAATCAGAAGAAGCAATTTCCATT  
CAAAAATTTAGCAAACTTGAATGACAACATTTTTCATATGCTTTTGGGCTGTGCTCTGAGGTTGTAATGGCCACATATAGCAGAAGTACATCTCAGAATCTTGAATCTG  
GAACAGATTTGCTTTCCCATGGAATCTGAATGTGCTTAAATTTGAAGCCCTTGTATTTTCAAAAAGTATTTGATCTTAAAGACTTGAAGGTTTTTAAAGCAGAAAGTAAATGAT  
AAAACACTTGAACAGATGTAACATCGAATCATGGAATCCCTTGCATGGCTCTCAGATTACCTTTATTTGATCTTATAAACAATCAAAGGACCAGAAAGGACCAACTGATCA  
CTTTGAACTGTGCTTGTCTTAACTTCTCCAGAAATAACACACTGCAGAGCAGATATGATCTTTTCTCTGTAAGATCTCAAAGAAAAAGGTTTCAACTACAGCTGTAAT  
CTACTGCAAAATGCAGAGACACAAGCAACTCAGCCTTCCAGACCCAGGCGAGGCAAGCAGGATGCAACGGATAGCAAAAACCACTAGAAAATGATACAAGAAATTTTGAAGTCTCTGTAA  
CTAAATACATATGTGAACGCTTCTATCTGAGCACCCAGAACTAGAACACATCATCTGAGCCCTTTCCAGCATACGCTGCAGAAATGAGTATGAACCTCATGAGACAGGCA  
TTTGGACCAAAATTTGATGTTTCCATGTTGATGTCATGGAATGTCATGTTGAAAGCCCTTGTATTTTCAAAAAGTATTTGATCTTAAAGACTTGAAGGTTTTTAAAGCAGAAAGTAAATGAT  
GACATTTCAAACGTTTGTGATCAAAGAAAGGAGTATGATTTATATAGTATTCTATAACTCGGCTTCTCATGCAGAGACTGAAAAACAATATTTTGCAGTATGCTTCCACCAGG  
CCCCCTACCTTGTCAACCACTCACATTTCTCGAAGTCTTACAAGTTTCTTAGTTCGCTTACGGATTTCTGAGGTTCCCTGAGGGAACATCTATATTTACCCTGAAAGTCCCAT  
AAAAATTTGAAAGGATATATCATGATGAACAAGCAGTTCCGGAAGCTGATGCTCACCACTTACTGCTCGGCAAGAACCCACTGCTGCGGACAGATGAGGCTTGTACTGCTG  
CAAGACGGAGACAGCAGGTGCGCCCGGCTAA

Rhodopsin

>panPan1

ATGAATGGCACAGAAGGCCCTAACTTCTACGTGCCCTTCTCCAATGCGAGGGTGTGGTACGACGCCCTTCAGTACCCACAGTACTACTGGCTGAGCCATGGCAGTTCT  
CCATGCTGGCCGCTACATGTTTCTGTGATCGTGTGGCTTCCCATCAACTTCTCACGCTCTACGTCACCGTCCAGCACAAGAAGCTGCGCACGCTCTCAACTACAT  
CCTGCTCAACCTAGCCGTGGCTGACCTCTTCAATGGTCTAGGTGGCTTACCAGCACCCCTTACACCTCTCTGCATGGATATCTGCTTCCGGGCCACAGGATGCAATTTG  
GAGGGCTTCTTTGCCACCTGGGCGGTGAAATTTGCCCTGTGGTCTTGGTGTCTGGCCATCCAGCAGTACGTTGGTGTGTTGAAGCCATGAGGCTTCCGCTTCCGG  
GAGAACCATGCCATCATGGCGTTCCTTCACTGGGTGATGGCGTGGCTTCCGCGCACCCGCTGCGCGGCTGCGCGGCTGGTCCAGGATACATCCCGAGGCTGCGATGCTCGT  
GTGAAATGACTACTACAGCTCAAGCCGAGGTCACAAACGAGTCTTTGTCTACATCTACATGTTCTGGTCCACTTCCACTTCCCATGATTTCTTCTGCTATGGG  
AGCTCGTCTTCACTGTCAGAGGAGGCGTGCACAGCAGGAGTGGCCACCACAagaaggcagagaaggaggTACCCGCATGGTATCATCATGTTGCTGCTTCTGATG  
TGTGGTGGCTTACGCAAGGCTGCAATTTCACTTCCACCCACCAAGGCTTCAACTTCCGTTCCATTTATGACCATCCGAGCAATCTTTGCAAGAGGCGCCGCT  
ACAACCCGTGCATCTATATCATGATGAACAAGCAGTTCCGGAAGCTGATGCTCACCACTTACTGCTCGGCAAGAACCCACTGCTGCGGACAGATGAGGCTTGTACTGCTG  
CAAGACGGAGACAGCAGGTGCGCCCGGCTAA

>rhFox1

ATGAATGGCACGGAAGGCCCTAACTTCTACGTGCCCTTCTCCAATGCGAGGGTGTGGTACGACGCCCTTCAGTACCCGACGACTACTCTGGCCGAGCCATGGCAGTTCT  
TCCATGCTGGCCGCTACATGTTCTGCTGATCGTGTGGCTTCCCATCAACTTCTCACGCTCTACGTCACCGTCCAGCACAAGAAGCTGCGCACGCTCTCAACTACA  
TCTGCTCAACCTAGCGGTGGGCGCTTCTCATGGTCTTCGGTGGCTTCCACAGCACCCTTACACCTCTCTGCATGGATCTGTGCTTCCGGGCCACAGGATGCAATGC  
GGAGGGCTTCTTTGCCACCTGGGCGGTGAAATTCGCCCTGTGGTCTTGGTGTCTGGCCATCCAGCAGTACGTTGGTGTGTTGAAGCCATGAGCCTTCCGCTTCCGG  
GGAACCATGCCATCATGGGCGTGGCTTCACTGGGTGATGGCGTGGCTTGCAGCAGTCTTGTCTACATGTTCTGGTCCACTTCCACTTCCCATGATTTATCATCTTCTGCTACG  
CGTGGGAAATCGACTACTACGCTCAAGCCAGAGGTCACAAACGAGTCTTTGTTATCTACATGTTCTGGTCCACTTCCACTTCCCATGATTTATCATCTTCTGCTACG  
GGCAGCTCGTCTTACCCTCAAGGAGGCGCTGCCAGCAGCAGGAGTCCGCCACCACAGAAGGCAAGAAAGGAGTCAACCCGATGGGATCATCTGCTGCTGCTGCT  
TTCTGATCTGCTGGGTCCTACGCCAGTGTGGCAATTTACATCTTCAACCCAGGAGGCTTCAACTTCCGTTCCATTTCCATGACCATCCGAGCAATCTTTGCAAGAGGCGCCAT  
CGCCATCTACAACCTGTCATCTATATCATGATGAACAAGCAGTTCGGAAACTGCATGCTCACCACCTTCTGCTGCGGCAAGAACCCGCTGGGTGACGACGAGGCTCTGCC  
ACTGTCTCAAAGCAGGAGACTAGCAGGTTGCCCGGCTAA

>gorGor3

ATGAATGGCACAGAAGGCCCTAACTTCTACGTGCCCTTCTCCAATGCGAGGGTGTGGTACGACGCCCTTCAGTACCCACAGTACTACTGGCTGAGCCATGGCAGTTCT  
CCATGCTGGCCGCTACATGTTTCTGCTGATCGTGTGGCTTCCCATCAACTTCTCACGCTCTACGTCACCGTCCAGCACAAGAAGCTGCGCACGCTCTCAACTACAT  
CCTGCTCAACCTAGCCGTGGCTGACCTTCAATGGTCTAGGTGGCTTACCAGCACCCCTTACACCTCTCTGCATGGATCTGTGCTTCCGGGCCACAGGATGCAATGC  
GAGGGCTTCTTTGCCACCTGGGCGGTGAAATTCGCCCTGTGGTCTTGGTGTCTGGCCATCCAGCAGTACGTTGGTGTGTTGAAGCCATGAGCCTTCCGCTTCCGG  
GGAACCATGCCATCATGGGCGTGGCTTCACTGGGTGATGGCGTGGCTTGCAGCAGTCTTGTCTACATGTTCTGGTCCACTTCCACTTCCCATGATTTATCATCTTCTGCTACG  
CGTGGGAAATCGACTACTACGCTCAAGCCAGAGGTCACAAACGAGTCTTTGTTATCTACATGTTCTGGTCCACTTCCACTTCCCATGATTTATCATCTTCTGCTACG  
GGCAGCTCGTCTTACCCTCAAGGAGGCGCTGCCAGCAGCAGGAGTCCGCCACCACAGAAGGCAAGAAAGGAGTCAACCCGATGGGATCATCTGCTGCTGCTGCTGCT  
TTCTGATCTGCTGGGTCCTACGCCAGTGTGGCAATTTACATCTTCAACCCAGGAGGCTTCAACTTCCGTTCCATTTCCATGACCATCCGAGCAATCTTTGCAAGAGTGC  
CGCCATCTACAACCTGTCATCTATATCATGATGAACAAGCAGTTCGGAAACTGCATGCTCACCACCTTCTGCTGCGGCAAGAACCCGCTGGGTGACGACGAGGCTCTGCC  
ACTGTCTCAAAGCAGGAGACTAGCAGGTTGCCCGGCTAA

GCAGCTCGTCTTACCCTCAAGGAGGCGCTGCCAGCAGCAGGAGTCCGCCACCACACAGAAGGCAGAGAAGGAGGTACCCCGCATGGTCATCATATGGTCATCGCTT  
CCTGATCTGCTGGGTGCCCTACGCCAGCGTGGCATTCTACATCTTACCACCAGGGCTCCAACTTCGCTCCATCTTACGACCATCCAGCATTCTTTGCCAAGAGCGCC  
GCCATCTACAACCCGTGTCATATATCATGATGAACAAGCAGTTCGGAACTGCATGCTCACCACCATCTGCTGCGGCAAGAACCACCTGGGTGACGATGAGGCCTCTGCTA  
CCGTGTCCAAGACGGAGACGACGAGGTGGCCCCGGCCTAA

>panTr04

ATGAATGGCACAGAAGCCCTAACTTCTACGTGCCCTTCTCCAATGCGACGGGTGTGGTACGCAGCCCTTCGAGTACCCACAGTACTACCTGGCTGAGCCATGGCAGTTCT  
CCATGCTGGCCGCTACATGTTTCTGCTGATCGTGGCTTCCCATCAACTTCTCACGCTTACGCTCCAGCTCCAGCAAGAAGCTGCGCAGCCCTTCAACTATATC  
CTGCTCAACCTAGCCGTGGCTGACCTTCTCATGGTCTAGGTGGCTTACCAGCACCCTTACACCTCTCTGCATGGATACTTCTGCTTTCGGGCCACAGGATGCAATTTGG  
AGGGCTTCTTTGCCACCTGGGCGGTGAAATTTGCCCTGTGGTCTTGGTGGTCTGGCCATCGAGCGGTACGTTGGTGGTGTAAAGCCCATGAGCAACTTCGGCTTCGGG  
AGAACCATGCCATCATGGCGTTCACCTTACCTGGCTATGGCGCTGGCTTCCAGCACCCTCCAGCAGGATGTCAGGATACATCCCGAGGCGCTGCAGTGTCTCG  
TGTGAAATGACTACTACAGCTCAAGCCGAGGTCAACAACGAGTCTTTTGCATCTACATGTTCTGGTCCACTTCCACATCCCATGATTATCATCTTTTTCTGCTATGGG  
CAGCTGCTTCACTGTCAAGGAGGCGCTGCCAGCAGCAGGAGTCCGCCACCACAGAAGGCAGAGAAGGAGGTACCCCGCATGGTCATCATCATGGTCTATCGCTTTC  
CTGATCTGCTGGGTGCCCTACGCCAGCGTGGCATTCTACATCTTACCACCAGGGCTCCAACTTCGGTCCCATCTTTCATGACCATCCAGCATTCTTTGCCAAGAGCGCG  
CCATCTACAACCCGTGTCATATATCATGATGAACAAGCAGTTCGGAACTGCATGCTCACCACCATCTGCTGCGGCAAGAACCACCTGGGTGACGATGAGGCCTCTGCTAC  
CGTGTCCAAGACGGAGACGAGGTGGCCCCGGCCTAA

>calJac3

ATGAATGGCACTGAAGGCCCTAACTTCTACGTGCCCTTCTCCAACGCGACGGGCGTGGTGGCAGGCCCTTCGAGTACCCTCAGTACTACCTGGCAGAGCCATGGCAGTTT  
TCCATGCTGGCCGCTACATGTTCTGCTGATGTTGCTGGGCTTCCCATCAACTTCTCACGCTTACGTCACCGTCCAGCACAAGAAGCTGCGCAGCCCTTCAACTACAT  
CCTGCTCAACCTGGCCGTGGCTGACCTTTCATGGTCTTCGGTGGCTTACCACCACCTTCTACACCTCTCTGCATGGATACTTTCATCTTCGGGCCACAGGATGCAATGC  
GAGGGCTCTTTGCCACCTGGGCGGTGAAATTTGCCCTGTGGTCTTACCAGCACCCTTACACCTCTCTGCATGGATACTTTCATCTTCGGGCCACAGGATGCAATGC  
GAGAACCATGCCATCATGGCGTTCACCTGGCTATGGCCCTGGCTTCCAGCAGGATGTCAGGATGTCAGGATGTCAGGATGTCAGGATGTCAGGATGTCAGGATGTC  
ATGTGAATCGACTACTACGCTCAAGCCGAGGTCAACAACGAGTCTTGTATCTACATGTTCTGGTCCACTTCCACATCCCATGATTGTATCATCTTCTTCTGATGG  
GCAGCTGTCTTACCCTCAAGGAGGCGCGCCAGCAGCAGGAGTGGCCACCACACAGAAGGCGGAGAAGGAGGTACCCCGATGGTCATCATCATGGTCTATCGCTT  
TCCTGATCTGCTGGGTGCCATGATGCCAGCGTGGCATTCTACATCTTCCACACCAGGGCTCCAACTTCGGTCCCATCTTTCATGACCATCCAGCATTCTTCGCCAAGAGCGC  
GCCATCTACAACCCGTGTCATATATCATGATGAACAAGCAGTTCGGAACTGCATGCTCACCACCATCTGCTGCGGCAAGAACCACCTGGGTGACGATGAGGCCTCTGCTAC  
ACCGTGTCCAAGACGGAGACGACGAGGTGGCCCCGGCCTAA

>nasLar1

ATGAATGGCACGGAAGGCCCTAACTTCTACGTGCCCTTCTCCAACGCGACGGGCGTGGTGGCAGGCCCTTCGAGTACCCTCAGTACTACCTGGCCGAGCCATGGCAGTTT  
TCCATGCTGGCCGCTACATGTTCTGCTGATCGTGGTGGCTTCCCATCAACTTCTCACGCTTACGTCACCGTCCAGCACAAGAAGCTGCGCAGCCCTTCAACTACAT  
TCTGCTCAACCTGGCCGTGGCGACCTTTCATGGTCTTCGGTGGCTTACCAGCACCCTTACACCTCTCTGCATGGATACTTTCATCTTCGGGCCACAGGATGCAATGC  
AGAGGGCTCTTTGCCACCTGGGCGGTGAAATTTGCCCTGTGGTCTTGGTGGTCTGGCCATCGAAGCCGATGAGTGGTGGTGTAAAGCCCATGAGCAACTTCGGCTTCGG  
GAGAACCATGCCATCATGGCGTTCACCTGGCTATGGCCCTGGCTTCCAGCAGGATGTCAGGATGTCAGGATGTCAGGATGTCAGGATGTCAGGATGTCAGGATGTC  
GTGGGAATCGACTACTACGCTCAAGCCGAGGTCAACAACGAGTCTTGTATCTACATGTTCTGGTCCACTTCCACATCCCATGATTATCATCTTCTTCTGCTACGG  
GCAGCTGTCTTACCCTGAAGGAGGCGCGTCCAGCAGCAGGAGTCCAGCCACCACACAGAAGGCAGAGAAGGAGGTACCCCGCATGGTCATCATCATGGTCTATCGCTT  
CCTGATCTGCTGGGTGCCATGATGCCAGCGTGGCATTCTACATCTTCCACACCAGGGCTCCAACTTCGGTCCCATCTTTCATGACCATCCAGCATTCTTCGCCAAGAGCGC  
GCCATCTACAACCCGTGTCATATATCATGATGAACAAGCAGTTCGGAACTGCATGCTCACCACCATCTGCTGCGGCAAGAACCCTGGGTGACGATGAGGCCTCTGCCA  
CTGTGTCCAAGACGGAGACTAGCCAGGTGGCCCCGGCCTAA

>chlSab2

ATGAATGGCACGGAAGGCCCTAACTTCTACGTGCCCTTCTCCAACGCGACGGGCGTGGTGGCAGGCCCTTCGAGTACCCTCAGTACTACCTGGCCGAGCCATGGCAGTTT  
TCCATGCTGGCCGCTACATGTTCTGCTGATCGTGGTGGCTTCCCATCAACTTCTCACGCTTACGTCACCGTCCAGCACAAGAAGCTGCGCAGCCCTTCAACTACAT  
TCTGCTCAACCTAGCCGTGGCCGACCTTTCATGGTCTTCGGTGGCTTACCAGCACCCTTACACCTCTCTGCATGGATACTTTCATCTTCGGGCCACAGGATGCAATGC  
GGAGGGCTCTTTGCCACCTGGGCGGTGAAATTTGCCCTGTGGTCTTGGTGGTCTGGCCATCGAAGCCGATGAGTGGTGGTGTAAAGCCCATGAGCAACTTCGGCTTCGG  
GGAGAACCATGCCATCATGGCGTTCCTTCACTTGGTCTATGGCGTGGCTTCCAGCAGCAGGAGTCCAGCCACCACACAGAAGGCAGAGAAGGAGGTACCCCGCATGGTCATCATCATGGTCTATCGCTT  
GTGGGAATCGACTACTACGCTCAAGCCGAGGTCAACAACGAGTCTTGTATCTACATGTTCTGGTCCACTTCCACATCCCATGATTGTATCATCTTCTTCTGCTACGG  
GCAGCTGTCTTACCCTGAAGGAGGCGCGTCCAGCAGCAGGAGTCCAGCCACCACACAGAAGGCAGAGAAGGAGGTACCCCGCATGGTCATCATCATGGTCTATCGCTT  
CCTGATCTGCTGGGTGCCATGATGCCAGCGTGGCATTCTACATCTTCCACACCAGGGCTCCAACTTCGGTCCCATCTTTCATGACCATCCAGCATTCTTCGCCAAGAGCGC  
GCCATCTACAACCCGTGTCATATATCATGATGAACAAGCAGTTCGGAACTGCATGCTCACCACCATCTGCTGCGGCAAGAACCCTGGGTGACGATGAGGCCTCTGCCA  
CTGTGTCCAAGACGGAGACTAGCCAGGTGGCCCCGGCCTAA

>salBo1

ATGAATGGCACAGAAGGCCCTAACTTCTACGTGCCCTTCTCCAACGCGACGGGCGTGGTGGCAGGCCCTTCGAGTACCCTCAGTACTACCTGGCCGAGCCATGGCAGTTT  
TCCATGCTGGCCGCTACATGTTCTGCTGATCGTGGTGGCTTCCCATCAACTTCTCACGCTTACGTCACCGTCCAGCACAAGAAGCTGCGCAGCCCTTCAACTACAT  
TCTGCTCAACCTAGCCGTGGCCGACCTTTCATGGTCTTCGGTGGCTTACCAGCACCCTTACACCTCTCTGCATGGATACTTTCATCTTCGGGCCACAGGATGCAATGC  
GGAGGGCTCTTTGCCACCTGGGCGGTGAAATTTGCCCTGTGGTCTTGGTGGTCTGGCCATCGAAGCCGATGAGTGGTGGTGTAAAGCCCATGAGCAACTTCGGCTTCGG  
CGAGAACCATGCCATCATGGCGTTCCTTCACTTGGTCTATGGCGTGGCTTCCAGCAGCAGGAGTCCAGCCACCACACAGAAGGCAGAGAAGGAGGTACCCCGCATGGTCATCATCATGGTCTATCGCTT  
CATGGGAATCGACTACTACGCTCAAGCCGAGGTCAACAACGAGTCTTGTATCTACATGTTCTGGTCCACTTCCACATCCCATGATTGTATCATCTTCTTCTGCTACGG  
GCAGCTGTCTTACCCTGAAGGAGGCGCGTCCAGCAGCAGGAGTCCAGCCACCACACAGAAGGCAGAGAAGGAGGTACCCCGCATGGTCATCATCATGGTCTATCGCTT  
TGGGTGCCATGATGCCAGCTGGCATTCTACATCTTCCACACCAGGGCTCCAACTTCGGTCCCATCTTTCATGACCATCCAGCATTCTTCGCCAAGAGCGCGCCATCTACA  
ACCTGTATCTATATCATGATGAACAAGCAGTTCGGAACTGCATGCTCACCACCATCTGCTGCGGCAAGAACCCTGGGTGACGATGAGGCCTCTGCCACCGTGTCCA  
GACGGAGACTAGCCAGGTGGCCCCGGCCTAA

>papAnu2

ATGAATGGCACGGAAGGCCCTAACTTCTATGTCGCCCTTCTCCAACGCGACGGGCGTGGTGGCAGGCCCTTCGAGTACCCTCAGTACTACCTGGCCGAGCCATGGCAGTTT  
TCCATGCTGGCCGCTACATGTTTCTGCTGATCGTGGTGGCTTCCCATCAACTTCTCACGCTTACGTCACCGTCCAGCACAAGAAGCTGCGCAGCCCTTCAACTACAT  
TCTGCTCAACCTAGCCGTGGCCGACCTTTCATGGTCTTCGGTGGCTTACCACCACCCTTACACCTCTCTGCATGGATACTTTCATCTTCGGGCCACAGGATGCAATGC  
GGAGGGCTCTTTGCCACCTGGGCGGTGAAATTTGCCCTGTGGTCTTGGTGGTCTGGCCATCGAAGCCGATGAGTGGTGGTGTAAAGCCCATGAGCAACTTCGGCTTCGG  
GGAGAACCATGCCATCATGGCGTTCCTTCACTTGGTCTATGGCGTGGCTTCCAGCAGCAGGAGTCCAGCCACCACACAGAAGGCAGAGAAGGAGGTACCCCGCATGGTCATCATCATGGTCTATCGCTT  
CGGGAATCGACTACTACGCTCAAGCCGAGGTCAACAACGAGTCTTGTATCTACATGTTCTGGTCCACTTCCACATCCCATGATTGTATCATCTTCTTCTGCTACGG  
CAGCTGCTTCCACCTGAAGGAGGCGCGTCCAGCAGCAGGAGTCCAGCCACCACACAGAAGGCAGAGAAGGAGGTACCCCGCATGGTCATCATCATGGTCTATCGCTT  
TTCCTGATCTGCTGGGTGCCATGATGCCAGCGTGGCATTCTACATCTTCCACACCAGGGCTCCAACTTCGGTCCCATCTTTCATGACCATCCAGCATTCTTTGCCAAGAGCGCCTCCATC  
TACAAACCCGTGTCATATATCATGATGAACAAGCAGTTCGGAACTGCATGCTCACCACCATCTGCTGCGGCAAGAACCCTGGGTGACGATGAGGCCTCTGCCACCGTGT  
CCAAGACGGAGACTAGCCAGGTGGCCCCGGCCTAA

>hg38

ATGAATGGCACAGAAGGCCCTAACTTCTACGTGCCCTTCTCCAATGCGACGGGTGTGGTACGCAGCCCTTCGAGTACCACAGTACTACCTGGCTGAGCCATGGCAGTTT  
CCATGCTGGCCGCTACATGTTTCTGCTGATCGTGGTGGCTTCCCATCAACTTCTCACGCTTACGTCACCGTCCAGCACAAGAAGCTGCGCAGCCCTTCAACTACAT  
CCTGCTCAACCTAGCCGTGGCTGACCTTTCATGGTCTTAGGTGGCTTACCAGCACCCTTACACCTCTCTGCATGGATACTTTCATCTTCGGGCCACAGGATGCAATGC  
GAGGGCTCTTTGCCACCTGGGCGGTGAAATTTGCCCTGTGGTCTTGGTGGTCTGGCCATCGAAGCCGATGAGTGGTGGTGTAAAGCCCATGAGCAACTTCGGCTTCGG  
AGAACCATGCCATCATGGCGTTCACCTGGCTATGGCCCTGGCTTCCAGCAGGATGTCAGGATGTCAGGATGTCAGGATGTCAGGATGTCAGGATGTCAGGATGTC  
GTGGGAATCGACTACTACGCTCAAGCCGAGGTCAACAACGAGTCTTGTATCTACATGTTCTGGTCCACTTCCACATCCCATGATTGTATCATCTTCTTCTGCTACGG  
CAGCTGCTTCCACCTGAAGGAGGCGCGTCCAGCAGCAGGAGTCCAGCCACCACACAGAAGGCAGAGAAGGAGGTACCCCGCATGGTCATCATCATGGTCTATCGCTTTC  
CTGCTGGTGGCTATGCCAGCGTGGCATTCTACATCTTCCACACCAGGGCTCCAACTTCGGTCCCATCTTTCATGACCATCCAGCATTCTTTGCCAAGAGCGCCTCCATC  
TACAACCCGTGTCATATATCATGATGAACAAGCAGTTCGGAACTGCATGCTCACCACCATCTGCTGCGGCAAGAACCCTGGGTGACGATGAGGCCTCTGCCACCGTGT  
CCAAGACGGAGACTAGCCAGGTGGCCCCGGCCTAA

>macFas5

ATGAATGGCACGGAAGGCCCTAACTTCTACGTGCCCTTCTCCAACGCGACGGGCGTGGTGGCAGGCCCTTCGAGTACCCTCAGTACTACCTGGCCGAGCCATGGCAGTTT  
TCCATGCTGGCCGCTACATGTTTCTGCTGATCGTGGTGGCTTCCCATCAACTTCTCACGCTTACGTCACCGTCCAGCACAAGAAGCTGCGCAGCCCTTCAACTACAT  
CCTGCTCAACCTAGCCGTGGCCGACCTTTCATGGTCTTCGGTGGCTTACCACCACCCTTACACCTCTCTGCATGGATACTTTCATCTTCGGGCCACAGGATGCAATGC  
GAGGGCTCTTTGCCACCTGGGAGGTGAAATTTGCCCTGTGGTCTTGGTGGTCTGGCCATCGAAGCCGATGAGTGGTGGTGTAAAGCCCATGAGCAACTTCGGCTTCGG  
GAGAACCATGCCATCATGGCGTTCACCTGGCTATGGCCCTGGCTTCCAGCAGGATGTCAGGATGTCAGGATGTCAGGATGTCAGGATGTCAGGATGTCAGGATGTC  
GTGGGAATCGACTACTACGCTCAAGCCGAGGTCAACAACGAGTCTTGTATCTACATGTTCTGGTCCACTTCCACATCCCATGATTGTATCATCTTCTTCTGCTACGG  
GCAGCTGTCTTACCCTCAAGGAGGCGCGTCCAGCAGCAGGAGTCCAGCCACCACACAGAAGGCAGAGAAGGAGGTACCCCGCATGGTCATCATCATGGTCTATCGCTT  
CCTGATCTGCTGGGTGCCATGATGCCAGCGTGGCATTCTACATCTTCCACACCAGGGCTCCAACTTCGGTCCCATCTTTCATGACCATCCAGCATTCTTTGCCAAGAGCGCC  
GCCATCTACAACCCGTGTCATATATCATGATGAACAAGCAGTTCGGAACTGCATGCTCACCACCATCTGCTGCGGCAAGAACCCTGGGTGACGATGAGGCCTCTGCTAC  
CCGTGTCCAAGACGGAGACGACGAGGTGGCCCCGGCCTAA

TGGGTGCCCTATGCCAGCGTGGCATTCTACATCTTACCCACCAGGGCTCCAACCTCGGTCCTCATGACCATCCAGCGTCTTTGCCAAGAGCGCCTCCATCTACAA  
CCTGTCACTATATCATGATGAACAAGCAGTCCGGAAGTGCATGCTCACCACCATCTGTCTGGCAGAAACCCGCTGGGTGACGATGAGGCTCTGCCACCGTGTCAAAG  
ACGGAGACTAGCCAGGTGGCCCCAGCCTAA

>nomLeu3

ATGAATGGCACAGAAGGCCCTAACTTCTACGTGCCCTTCCAATGCGACGGGAGTGTACGACAGCCCTTCGAGTATCCACAGTACTACCTGGCCGAGCCATGGCAGTTCT  
CCATGCTGGCCGCGCTACATGTTCTCGTGATTGTGCTGGGCTCCCATCAACTCCCTACGCTCTACGTCACCGTCCAGCACAAGAAAGCTGCGCAGCCTCAACTACAT  
CCTGCTCAACCTAGCTGTGGCTGACCTCTCATGGCTAGGTTCCAGGCTTCACACGACCTCTACACCTCTCTGCATGGTACTTGCCTTCCGGCCACAGATGCAATTTGG  
AGGGCTCTTTGCCACCTGGGCGGTGAAATTGCCCTGTGGTCTTGGTGTCTGGCCATCGAGCGGTACGTGGTGTGTAAAGCCATGAGCAACTCCGCTTTGGGG  
AGAACCATGCCATATGGGCGTTCACCTGGGTCATGGCGCTGGCCTGGCCGACCCCCCTCGCCGCGTGGTCCAGGTACATCCCCGAGGCGCTTGCAGTGTCTG  
TGCGGAATCGCATCTACACGCTCAAGCCAGAGGTTCAACAACGAGTCTCTCGTATCATACATGTTCCGGTCCACTTCCACATCCCATGATTATCATCTTTTTCTGCATGGG  
CAGCTGTCTTACCCTCAAGGAGCCGCTGCCAGCAGCAGGAGTGGCCACCACACAGAAGGCAGAGAAGGAGGTACCCCGCATCCATCATATGTCATGCTCGCTTT  
CTGATCTGTGGTGGTCCCTCAAGGAGCGTGGCATTCTACATCTTACCCAGCAGGCTCAGCAACTTCGGTCCATCTCTCATGACCATCCAGCATTCTTTGCCAAGAGCGCG  
CCATCTACAACCCTGTATATATCATGATGAACAAGCAGTTCGGGAAGTGCATGCTCACCACCATCTGTCTGGGCAAGAACCCTGGGTGACGATGAGGCTCCGCTAC  
CGTGTCCAAGAGCGGAGACCAGCCAGGTGGCCCCGGCCTAA

>ponAbe2

ATGAATGGCACAGAAGGCCCTAACTTCTACGTGCCCTTCCAATGCGACGGGCTGTACGACAGCCCTTCGAGTACCACAGTACTACCTGGCCGAGCCATGGCAGTTCT  
TCCATGCTGGCCGCGCTACATGTTCTCGTGATCGTGCTGGGCTCCCATCAACTTCCCTACGCTCTATGTACCAGTCCAGCACAAGAAAGCTGCGCAGCCTCAACTACAT  
CCTGCTCAACCTAGCCGTGGTGAACCTTTCATGGCTTAGGTGGTTCACCAGCACCCCTACACCTCTCTGCATGGTACTTCTGCTTCCGGCCACAGGATGCAACTTG  
GAGGGCTCTTTGCCACCTGGGCGGTGAAATGGCCCTGTGGTCTTGGTGTCTGGCCATCGAGCGGTACGTGGTGTGTGTAAGCCCATGAGCAACTCCGCTTCCGG  
GACACCTGGCATTGGGCTTCCCTTACCTGGCCTGACCTGGCCTGGCCTGGCCTGACCCGCCCTCGCCGCGTGGTCCAGTCCAGCCTTCCGCTTCCAGTCTCG  
TGCGGAATCGCATCTACACGCTTAAAGCCAGAGGTCAACAATGAGTCTTCTGCATCTACATGTTCCGTGGTCCACTTCCACATCCCATGATTATCATCTTTCTGCATGG  
CAGCTGTCTTACCCTCAAGGAGCCGCTGCCAGCAGCAGGAGTGGCCACCACACAGAAGGCAGAGAAGGAGGTACCCCGCATCCATCATATGTCATGCTCGCTTT  
CTGATCTGTGGTGGTCCCTCAAGGAGCGTGGCATTCTACATCTTACCCAGCAGGCTGCCAGAGTGGCCTACTCGCAGTCCACTGATGATGATGATGATGATGATG  
CCTATCTACAACCCTGTATATATCATGATGAACAAGCAGTTCGGGAAGTGCATGCTCACCACCATCTGTCTGGGCAAGAACCCTGGGTGACGATGAGGCTCCGCTAC  
CGTGTCCAAGAGCGGAGACCAGCCAGGTGGCCCCGGCCTAA

>rheMac3

ATGAATGGCACAGAAGGCCCTAACTTCTACGTGCCCTTCCAACGCGACGGGCTGGTGGCAGCCCTTCGAGTACCAGGACTACTACCTGGCCGAGCCATGGCAGTTCT  
TCCATGCTGGCCGCGCTACATGTTCTCGTGATCGTGCTGGGCTCCCATCAACTTCCCTACGCTCTACGTCATCTCCAGCACAAGAAGCTGCGCAGCCTCTCAACTACAT  
CCTGCTCAACCTAGCCGTGGTGAACCTTTCATGGCTTAGGTGGTTCACCAGCACCCCTACACCTCTCTGCATGGTACTTCTGCTTCCGGCCACAGGATGCAACTTG  
GAGGGCTCTTTGCCACCTGGGCGGTGAAATGGCCCTGTGGTCTTGGTGTCTGGCCATCGAGCGGTACGTGGTGTGTGTAAGCCCATGAGCAACTCCGCTTCCGG  
GACACCTGGCATTGGGCTTCCCTTACCTGGCCTGACCTGGCCTGGCCTGGCCTGGCCTGGCCTGGCCTGGCCTGGCCTGGCCTGGCCTGGCCTGGCCTGGCCTGG  
GAGAACCATTGCCATCAAGGCGTTCGCTTACCTGGGTCATGGCCTGGCCTGGCCTGGCCTGGCCTGGCCTGGCCTGGCCTGGCCTGGCCTGGCCTGGCCTGG  
TGCGGAATCGCATCTACACGCTTAAAGCCAGAGTCAACAACGAGTCTTTGTTATCTCATGTTCCGTGGTCCACTTCCACATCCCATGATTGTCATGCTCGCTTCC  
CAGCTGTCTTACCCTCAAGGAGCCGCTGCCAGCAGCAGGAGTGGCCACCACACAGAAGGCAGAGAAGGAGGTACTCGCATGGTTCATCATGATGATGATGATG  
CCTATCTACAACCCTGTATATATCATGATGAACAAGCAGTTCGGGAAGTGCATGCTCACCACCATCTGTCTGGGCAAGAACCCTGGGTGACGATGAGGCTCCGCTAC  
CGTGTCCAAGAGCGGAGACCAGCCAGGTGGCCCCGGCCTAA

SAMHD1

>panPan1

ATGCAGCGAGCCGATTCCGAGCAGCCCTCCAAGCGTCCCCGTTGCGATGACAGCCCGAGAACCCTTCAAAACCCCTTCCGAGAGGCGAGACTGGTCCCCGGCCCTGGA  
ACTCCATCCGACTACAAGACATGGGGTCCGAGCAGGTTGTCCTTCCCTCAGCCGCGGCTTGAAGAGCTGGTGTCTGCTGAAGAACATCCGAGAAACATGAAATCAC  
AGTGCTCAACTAGCCCTGCTTGTATGATGCTCGTTTTGAAAATCTTGGAAATCTTGGAGTAAGTCTTGGGGAGAGGAAGAAGCTGCTAGTTATATACCGCATGGTTCAAATCCAG  
TTGATACAATGAAGGTAATTAATGATCCTATCCATGGCCACATTGAGCTCCACCCTCCTTGTCCGAATCATTGATACACCTCAATTTCAACGCTTCGATACATCAACAGCT  
GGGAGGTGGTACTATGTTTTCCAGGAGCTTCAACAATCGATTTGAGCATAAGTCTAGGGGTGGGATATAGCAGGATGTCTAGTTGCGGCCACTGGGTGAAAAACAAACCA  
GAGCTGCAGATAAGTGAACGATATCTCTGTGTTCAGATTGCTGGACTTTGTGCATGATCTCGTCTGAGCCATTTTTCACATGTTTGGGCGATTTCACCTTCCGCTC  
GCCGAGGTGAAATGGACGCATGAACAAGGCTCAGTTATGATGTTTGAAGCCTTAAATTTCTAATGGAATCAAGCCTGTGATGAACAATATGGTCTCATCCCTGAAAGaa  
atattgtctataaagAACAAATTTGAGGACCCTTGAATCACTCGAAGATTCAATTTGTGGCCATATAAAGGCGCTCTGAAACCAAAAAGCTTCCCTTATGAGATAGTGTCTAATA  
AAAGAAATGGCATTGAtlgtgcaaatggtattttGCCAGGACTGCCATATCTTGAatccaaatattttgattacaAGCGCTTTAATAAGTTTGGCCGTGTCTGTAAGTAGACAATGAGT  
TGCGCTATTTGTGATAGATAGAGGAGTGGAAATCTGTATGACATGTTCCACACTCGCACTTTCACCCGTAGAGCTTATCAACACAAAGTGGGAACATTATTGATACAA  
TGATTACAGATTGCTTTTCCAAAGCAGATGACTACATAGAGATTTACAGGATGCTGGAGGAAAGGATATCGCATTTCTACAGCAATTGACAGACATGGAAAGCCTACTACTAG  
ACAGACAACATTTTTCTGGAGTTTTACTCTACTGATCCAAATGAAAGACGCAGAGAGATTTTGAACAATAATGAATACCGTATCTATTTGAAAGTATGTTGGGTGAGACG  
CAGCCAAAGGACAAATAAAGATTGAAAGGAGGACTATGAATCTCTCCAAAGAGTGGTCCAGGATGCTAGACCTTAAACCAAAAGTATGCTAGACTGAAACTGAAAGCTGAAAGTT  
TATAGTGGATGTTATCAACATGGATTATGGAATGCAAGAAAAGAAATCCAATTGATCATGTTAGCTTCTATTGTAAGACTGCCCCAAACAGAGCAATCAGGATTACTAAAAACA  
GgtttcACAATTTCTGCCAGAGAAATTTGCAGAGCAGCTGATTCCGACTATATTGTAAGAAGGTGGACAGAAGAGTTGATGCGCCGCAAGACAACATTTTGTTCAGTGGTGTGGA  
GACAGAAAATTTCAACCAAGCCGAGGATGGCGATGTTATAGCCCACTCAAAACCTCaaaaaaaGGAATGGAACGACAGTACTTCAAGTCCAAATGCTCAACTCCGCTCCGAGAA  
GCATCCAAAGCAGAGTCCAGCTTTTTAAAGATGACCCAATGTGA

>rhFox1

ATGCAGCAAGCCGACTCCGACCAGCCCTCCAAGCGGCCCCGTTGCGATGACAGCCCGAGAACCCTTCAAGCACCCTTCCGAGAGGCGAGACTGGTCCCCGGCCCTGGA  
ACTCCATCCGACTACAAGACATGGGGTCCGAGCAGGTTGTCCTTCCCTCAGCCGCGGTGGGCTTGAAGAGCCAGTGTCTGCTGAAGAACATCCGAGAAAACAAATTCAC  
AGGCGATTACTGCCCTGCTTGTATGATGCTCGTTTTGAAAATCTTGGAGTAAAGTCTTGGGGAGAGGAAAGAGCTGCTTATTATATCCAGCGATTGGTTCAAATCCACA  
TTGATACAATGAAGGTTAATGATCCTATCCATGGCCACATTGAGCTCCACCCTCCTCTGCTCCGATCATTGACACACCTCAATTTCAACGCTTCGATACATCAAAACAGC  
TGGGAGGTGGTACTATGTTTTCCAGGAGCTTCCACAACTCGAATTTGAGCATAGTCTAGGCTTCCAGGATGCTAGCAGGATGCTAGCAGGATGCTAGCAGGATGCTAGCAGG  
AGAGCTGCAGATAAGTGAACGAGATATCTCTGTGTTCAGATTGTGACTTTGTGCATGATCTGGTTCATGGCCATTTTCTCAGATGTTTGTAGGACGATTTATCCACTTGC  
TCGCCCGAGGTGAAATGGACGATGAACAAGGCTCAGTTATGATGTTTGAACACTTAAATTTCTAATGAAATCAAGCCGTGTCATGGAACATATGGTCTCATCCCTGAA  
AAGATATTTGCTTTATCAAGGAACAAATTTGAGGACCACTTGAATCACTCTGTCACACATGTTTTGTGGCCATATAAAGGCGCTCCTGAAAGGAAAAGCTTCCCTTATGAGATAG  
GTCTAATAAAGAAATGGCATGATGATGGACAATGGGATTATTTGCCAGGACTGCCATCATCTTGAATCCAAATAATTTTATTGATCAAGCGCTTCATTAAGTTTGGCC  
GTGCTGTGAAGTAGGCAATGATTGCGTATTTGTCTAGAGATAAGGAAGTTGAAATCTGTATGACATGTTCCACACTCGTAACTCTTACACCAGTAGAGCTTATCAACACA  
AAGTTGGCAACATTATTGATACAATGATTACAGATGCTTCCCTCAAGCAGCAGACTATATAGAGATTACAGGTGCTGGAGGAAAAAGTATCACATTTCTACAGCAATTGATG  
ACATGGAAGCCTATACTAAGCTGACAGATAACATTTTCTGGAGATTTTACTCTACTGATCCAAAATGAAAGATGACAGGAGATTTTAAAAAATTTGAATACCGTAACTT  
ATTCAGATATGTGGGTGAGACCCAGCCGCAAGGACAAGTAAAGATTTAAAGAGGAGGACTATGAATCTCTTCCAAAAGAGGTTGCTGTCTCAACCCAAAGAAATTTGCTGAA  
GTAAACTGGAGGCTGAAGATTTTATAGTGGATGTTAACAACATGAAATTTGAAATGCAAGAAAAGAAATCCAATTTGATCAGTGTAGCTTCTATTTGAAAGTACCCCAACA  
CCAATCAGGATTAAGAAAGCAGGTTTCAACACTTCTGCCAGAAAATTTGCCAGAGACTGATTCAGATATTGTAAGAAGTACAGTGGATTTGATGAAAGTGGCTGATGCTGCTG  
ACAACACTTTGTTCAGTGGTGGCAGACAGAAATTTCAACAAGCCTCAGGATGGCGATGTTATAGCCCACTCATAACACTCAGAAAAGGAATGGAACACTCAGGACTTCCAG  
TCCAAGTCCAACCTTGCCTCCGAGAAAGCATCCAAAAGCAGACTCCAGCTTTTTAAAGATGACCCAAGGTTGA

>gorGor3

ATGCAGCGAGCCGACTCCGAGCAGCCCTCCAAGCGGCCCCGTTGCGATGACAGCCCGAGAACCCTTCAAAACCCCTTCCGAGAGGCGAGACTGGTCCCCGGCCCTGGA  
ACTCCATCCGACTACAAGACATGGGGTCCGAGCAGGTTGTCCTTCCCTCAGCCGCGGTGGGCTTGAAGAGCCAGTGTCTGCTGAAGAACATCCGAGAAAATGAAATCAC  
AGGCACATTACTGCCCTGTCTTGTAGTCTCGTTTTGAAAATCTTGGAGTAAAGTCTTGGGGAGAGGAAAGAGCTGCTTATTATATCCAGCGATTGGTTCAAATCCACA  
TTGATACCATGAAGGTAATTAATGATCCTATCCATGGCCACATTGAGCTCCACCCTCCTTGTCCGAATCATTGATACACCTCAATTTCAACGCTTCGATACATCAAAACAGCT  
GGGAGGTGGTACTATGTTTTCCAGGAGCTTCAACAATCGATTTGAGCATAAGTCTAGGGGTGGGATATCTAGCAGGATGCTAGTTCCGCGCAGTGGGTGAAAAACAAACA  
GAGCTGCAGATAAGTGAACGAGATATCTCTGTGTTCAGATTGCTGGACTTTGTGCATGATCTCGGTCATGGCCATTTTCTCAGATGTTTGTGAGCGGTTTATCCACTTGT  
CGCCGGAGGTGAAATGGAGCAGATGAACAAGGCTCAGTTATGATGTTTGGAGCTTTAATTAATCTAATGGAATCAAGCTTTCATGGAATCAAGCTTTCATGCACTTCCCTGAA  
AGATATTTGCTTTAAAGGAACAAATTTAGGACCCTTGAATCGCCTGTCAAAGATTCTATTGTCATATAAAGGGCGTCTGAAAACAAAAGCTTCCCTTATAGATAGT  
GTCTAATAAAGAAATGGCATTGATGTGGACAATGGGATTTTGTCCAGGAGGACTGCCATCATCTTGAATCCAAAATAAATTTGATTACAAGCGCTTATTAAAGTTTGCCCGT  
GTCTGTGAAGTAGACAATTGAGTTGCGTATTTGTCTAGAGATAAGGAAATTTGAAAATCTGTATGACATGTTCCACACTCGCAACTTTCACCCGTAAGCTTATCAACACAAA  
ATTTGGCAACCTATTATGATCAAAATGATTACAGATGCTTTCCTCAAAGCAGATGAGTATGAGATACAGGTTGCTGGAGGAAAAAGGATTCGCAATTTTCAAGAAATGACGAC  
GTGGAAGCATTACTAGCAGCAGATGAACAATTTTTCTGGAGATTTATACTACTGATTCATGCTGCAAAATTTAAAGACGCAGAGAGATTTTAAACAAATTTAGAAACCGTAACT  
TCAAGTATGTTGGTGAGACGCAGCCAAAGGACAATAAAGATTTAAAGGGAGGACTATGAATCTCTCCAAAAGAGGTTGCCAGTGTAAACCAAAAGTATTGCTAGACGT  
GAAACTGAAGGCTGAAGATTTTATAGTGGATGTTTCAACATGGATTATGGAATGCAAGAAAAGAAATCCAATTGATCATGTTAGCTTCTATTGTAAGACTGCCCCAAACAGAG

AATCAGGATTACTAAAACCCAGTTTCCACAACCTCTGCCAGAGAAAATTTGCAGACGAGCTGATTCGAGTATATTGTAAGAAGGTGGACAGAAAGAGTTTGTATGCCGCAAGAC AACATTTTGTTTCAGTGGTGTCCAGACAGAAATTTCCAAAGCCGAGGATGGCGATGTTATAGCCCCACTATAACACCTCAAAAAGGAATGGAACGACAGTACTTCCAGTC CAAAATCCAGCTCGCCTCCGAGAAGCATCCAAAAGCAGAGTCCAGCTTTTAAAGATGACCCAAATGTGA

>panTro4

ATGCAGCGAGCCGATTCCGAGCAGCCCTCCAAGCGTCCCCTGGCGATGACAGCCCGAGAACCCCTCAAAACCCCTTCCACAGAGGCAGACTGGTCCCAGGCGCTGGA ACTCCATCCCGACTACAAGACTGGGGTCCGAGCAGGTTGCTCCTTCCAGCCGCGTGGCTTGAAGAGCTGGTCTGCTGAAGAACATCCGAGAAAATGAAATCCAC AGGCGATTACTGCCCTGTCTTATGAGTCTCGTTTTGAAAATCTTGGAGTAAGTTCCTTGGGGGAGAGGAAGCTGCTTAGTTATATCCAGCGATTGGTTCAAATCCACG TTGATACAATGAAGTAATTAATGATCCTATCCATGGCCACATTGAGCTCCACCCTCCTTGTCCGAATCATTGATACACCTCAATTTCAACGCTTCCGATACATCAACAGCT GGGAGGTGGTACTATGTTTTCCAGGAGCTTACACAAATCGATTGAGCATAGTCTAGGGGTGGGGTATCTAGCAGGATGTCTAGTTCGCGCAGCTGGGTGAAAAACAACCA GAGCTGCAGATAAGTGAACGAGATATCTCTGTGTTCCAGATTGCTGGACTTTGTGCATGATCTGGTTCATGGCCATTTTTCTACATGTTTGTATGAGCATTTATCCACTTGT CCCCCGGAGGTGAAATGGACGCATGAACAAGGCTCAGTTATGATGTTGAGCACCTTATTAATTTCTAATGGAATCAAGCCTGTCTGGAACAAATATGGTCTCATCCCTGAAGA AGATATTTGCTTTATAAAGGAACAAATTTAGGACCCTTGAATCACCTGTCCGAAGATTCTGTGGCCATATAAAGGGCGCTGAAAACAAAAGCTTCTTTATGAGATAGT GTCTAATAAAGAAATGGCATTGATGTTGACAAATGGGATTATTTGCCAGGGACTGCCATCATCTTGGAAATCCAAAATAATTTGATTACAAGCGCTTTATTAAGTTTGCCCGT GTCTGTGAAGTAGACAATGAGTTGCGTATTGTGCTAGAGATAAG

GATTACAGATGCTTTCCAAAGCAGATGACTACATAGAGATTACAGGTGCTGGAGGAAAAAAGTATCGCATTTCTACAGCAATTTGACGACATGGAAGCCTTACTAAGCTGA CAGATAACATTTTTCGAGAGATTTTACTCTACTGATCCCAAAATGAAAGCAGCAGGAGATTTTGAACAAATTTGAATACCGTAATCTATTCAAGTATGTTGGGTGAAGACGCA GCCAACGAGCAAAATAAAGGATTTAAAGGGAGGACTGAATCTCTCCAAAAGAGGTTGCCAGTGTCAAAACCAAGTATTGCTAGACATGAAAGCTGAAGCTGAGATTTTA TAGTGGATGGGATCAACATGGATTATGGAATGCAAGAAAAGATCCAATTGATCATGTTAGTCTTATTGTAAGACTGCCCCCAACAGAGCAATCAGGATTACTAAAACCCAG-

GATGGCGATGTTATAGCCCACTCATAACACCTCAAAAAGGAATGGAACGACAGTACTTTCAGTCCAAAATCCAACCTCGCCTCCGAGAAGCATCCAAAAGCAGAGTCCAGCT TTTTAAAGATGACCCAAATGTGA

>calJac3

ATGCAGCAAGCCGACTTCGAGCAGCCCTCCAAGCGGCCCGTTCGCGATGACAGCCCGAGAACCCCCCAAAACCCCTTCCGAGAGGCAGACCGGCTCTGGTCCGGA ACTCCATCCTGACCACAAGACTGGGGCCCGGAGCAGGTTGCTCCTCCTCAGGCGCGTGGCTTCAAAGAGCCGGGGCTTGAAGAACATCCGAGAAAATAAAATCAC AGGCTCATTACTGCCCTGTCTTATGAGTCTCATTTTTGAAAATCTTGGAGTAAGTTCCTTGGGAGAGGAAGAGGCTGCTTAGTTATATCCAGCGAATGAGTCAAAATCCACAT TGATACGATGAAGGTAAATTAATGATCCTATCCATGGCCACATTGAGCTCCACCCTCCTCCTCATCCGAATCATTGATACGCCCTCAATTTCAACGCTTCCGATATCAAAACAGCT GGGAGCGGTTATTATGTTTTCCAGGAGCTTACACAATCGATTTGAGCATAGTCTAGGGTGGGGTATTGGCAGGATGTCTAGTTCGAGCCTTTGTGAAAAACAACCCAG AGCTGCAGATAAGTGAACGAGATATGCTCTGTGTTCCAGATTGCTGGGCTTTGTCATGATCTTGGTTCATGGCCATTTCTCACATGTTTGTATGGACGATTATTTCCACTTGTCT CCCCCGAGGTGAAATGGACACATGAACAAGGCTCAGTTAAGATGTTTGGAGCACTTAATTAATTTCAACCCGACTCAAGGCTGTCTGGAACACTTGGTCTCATCCCTGAAGAA GATATTTGCTTTTCAAAGGAACAAATTTGACAGCCACTTGAATCACTTAAAGATTTTGGCCATATAAAGGGCCCTCAAAGAAAAGAGCTTCTTTATGAGATAGTG GCTAATAAAGAAATGGCAATTTGATGTGGACAAAGTGGGATTTTGGCAGGGACTGCCATCATCTTGGAAATCCAAAATAATTTGATTACAAGCGTTTTATTAAGTTTGGCCGT GTCTGTGAAGTGAAGAAGCTTTCCAGGAGCTTACACAATCGATTTGACTAGAGATAAAGAAATGGAATTTGAAATTTCCACACTGCGCAACTGTTTCCAGCTGAGCATTAACACAAAA GTTGGAACATCATTGATACAATGATTACAGATGCGTTCCTCAAAGCGGACCCTACATAGAGATTACAGGTACTGAAGGAAAGAAGTATTGCATTTCTACAGCAATTGATGAC ATGGAAGCCTACACTAAGCTGACAGATAAATTTTTCTGGAGATTTTACTCTACTGATCCCAATTTGAAGCGCGCAGGAGAGATTTTAAAGATATTGAATACCGTAAATTTA ACAAGTATGTGGGTGAGACCCAGCCAAACAGGACAAATAAAGATTAAAGGGAGGAACTTAATAAGTCTTCCAAAAGAGGTTGCTGATGCTAAACCCAAAGTATTGATAAGGTAA AAGCTGAAGGCTGAACATTTTATAGTGGATTTATCAACATGGATTTAAGATGCAAGAAAGAAATCAAAATGATCATGTTCCGATTTCTAATGAGTGAAGAGTGACCCCAAGAAAGCG ATAATTGATTACTAAAACCCAGTTTCCAACTTTCGCAAGAGATTTGCAAGAGACTTTCGAGCAGCTGATTCGAGTACTGTAAGAAGCAGAGTGCAGGAAAGTATTGATGCTGCACAGCA ACACTTTGTTCAAGTGGTGTCTGACAAAAATTTCCAAAGCCGAGGATGGCGATGTTGAGCCCACTCATAACACCTCAGAAAAGCAGAAATGAAACTACAGGGCTTACAGCCC AGAGTCCAGCTCGCCTCCGAGAAGCATCCAAAAGCAGAGCCCGGCTTTTAAAGATGACCCGGTGT-A

>nasLar1

ATGCAGCAAGCCGACTCCGAGCAGCCCTCCAAGCGGCCCGTTCGCGATGACAGCCCGAGAACCCCTCAAGCACCCTTCCGAGAGGCAGACTGGTCCCAGGCGCTGGA ACTCCATCCCGACTACAAGACTGGGGTCCGAGCAGGTTGCTCCTTCCAGCCGCGGTTGAAGAGCCTTGAAGAGCAGTGTCTGATGAAGAACATCCGAGAAAATAAAATCAC AGGCGCATTACTGCCCTGTCTTATGAGTCTCGTTTTGAAAATCTTGGAGTAAGTTCCTTGGGGGAGAGGAAGAGCTGCTTAGTTATATCCAGCGATTGGTCAAATCCACA TTGATACAATGAAG----- GGTGGGGTATCTAGCAGGATGCTAGTTCGCGCCCTGGGTGAAAAACAAGCACTGCGAGATAAGTGAACGAGATATTCTCTGTGTTACAGATTGCTGGACTTTGTCATGATC TCG-----

CTAATGGAATCAAGCCTGTCTATGGAACACTATGGTCTCATCCCTGAAGAAGATATTGCTTTTCAAGGAACTAATTTGATAGGACCCTTGAATCACCTGTCAAACATGTTTGT GGCCATATAAAGGGCGTCTGAAAGGAAAAGCTTCTTTATGAGGTAGTGTCTAATAAAGAAATGGCATTGATGTGACAAATGGGATTATTTGCCAGGGACTGCCATCAT CTTGGAATCCAAAATAATTTGATTATAGCGCTTCAATTAAGTTTGGCCGTGCTGTGGAATAGGCAATGAGTTCGCTATTGTTGCTAGAGATAAAGAAATGGAAATCTGTAT GACATGTTCCACACTCGTAATCTTTACACCGTAGAGCTTTAACAACCAAAATTTGCAACACTTTCCTTCCAAAAGAGGTTGCTGATGCTAAACCCAAAGTACCCTATAGAGT ATTACAGGTGCTGGAGGAAAAGATATCGCATTTCTACAGCAATGATGATGATGCAAGGCTACTACTAAGCTGACAGATAAATTTTCTGGAGATTTTACTCTACTGATCCC AAATGAAAGCGCACAGAGATTTTAAACAAATTTGAATACCGTAACTTATCGAATGTGGGTGAGGAGCCCAACCGGACAAGTAAAGATTAAAAGGAGGAGACTATGA ATCTCTCCAAAAGAGGTTGCTGCTGTAACCCAAAGAATTGCTGGAAGTAAAATGGAGGCTGAAGATTTTATAGTGGAT-----

TTTTGTTCAAGTGGTGGCAGACAGAAATTTCCAAAGCCCTCAGGATGGCGATGTTATAGCCCACTCATAACACCTCAGAAAAGGAATGGAACACTACAGGACTTCCAGTCCAAA GTCCAACCTCGCCTCCAAGAGCATCCAAAAGCAGACTCCAGCTTTTTAAAGATGACCCAAAGTGA

>chlSab2

ATGCAGCAAGCCGACTCCGAGCAGCCCTCCAAGCGGCTCCGTTTCGATGACAGCCCAAGAACCCCTCAAGCACCCTTCCGAGAGGCAGACAGGTCGCCGGCCCTGGA ACTCCATCCCGACTACAAGACTGGGATCCGAGCAGGTTGCTCCTTCCAGCCGCGTGGCTTGGGAGAGCCGGCGCTGTAAGAACATCCGAGAAAATAAAATCAC AGGCGCATTACTGCCCTGTCTTATGAGTCTCGTTTTGAAAATCTTGGAGTAAGTTCCTTGGGGGAGAGGAAGAGCTGCTTAGTTATATCCAGCGATTGGTCAAATCCACA TTGATACAATGAAGTAATTAATGATCCTATCCATGGCCACATTGAGCTCCACCCTCCTCCTGTCGCGAATCATTGACACACCTCAATTTCAACGCTTCCGATATCAAAACAGCT TGGAGGTGGTACTATGTTTTCCAGGAGCTTACACAATCGATTTGAGCATAGTCTAGGGTGGGGTATCTGACAGGATGTCTAGTTCGCGCCTGGGTGAAAAACAACCC AGAGCTGCAGATAAGTGAACGAGATATTCTGTGTTCCAGATTGCTGGACTTTGTCATGATCTCGGTTCATGGCCATTTCTCATATGTTTGTATGGACGATTATTTCCACTTGC TCGCCCGAGGTGAAATGGACACATGAACAAGGCTCAGTTATGATGTTTGAAGCATTATAAATCTAATGGAATCAAGCCTGTCTGGAACACTATGGTCTCATCCCTGAAG AAGATATTTGCTTTATCAAGGAACAAATTTGATGAGCACCCTTGAATCACCTGTCAAAGGTGTTTTTGGGCCATATAAAGGGCGTCCGAAAGGAAAAGCTTCTTTATGAGATAG GTCTAATAAAGAAATGGCATTTGATGTGACAAATGGGATTATTTGCCAGGGACTGCCATCATCTTGGAAATCCAAAATAATTTGATTACAAGCGCTTCAATTAAGTTTGGCC GTGCTGTGAAGTAGGCAATGATGTTGCATATTTGTGCTAGAGATAAAGAAATGGAATTTGAAATCTGTATGACATGTTCCACACTCGCAACTCTTTACACCTGAGAGCTTATCAACACA AAGTTGGCAACATTATTGATACAATGATTACAGATGCTTCTCAAAGCAGAGACTATATAGAGATTACAGGTGCTGGAGGAAAAAGTATCGCATTTCTACAGCAATTGATG ACATGGAAGCCTATAACTAAGCTGACAGATAAATTTTCTGGAGATTTTAACTCTACTGATCCCAATTTGAAGAGGCACGAGAGATTTAAAACAAATTTGAATACCGTAAATCT ATTCAGATATGTTGGGTGAGACCCAGCCAAACCGGAACAAGTAAAGATTAAAGGGAGGACTATGAAATCTTCCAAAAGAGGTTGCCGCTGCTGAAACCCAGAGAAATTTGCTGGAA GTAAAACCTGGAGGCTGAAGATTTTATAGTGGATTTATCAACATGATTTGGAATGCAAGAAATAATCCAAATTTGATCATGTTAGCTTCTATTGTAAGACTGACCCCAACAGCA GCAAATCAGGATTACGAAAACCCAGGTTTCCAGACTTCCGAGAGACTTTGCAAGCAGCTGATTCGAGTATTTGTAAGAAGATGGAACGAGTATTGATGCTCCGCAAAA ACAACATTTTGTTCAGTGGTGTGCAGACAGAAATTTCCAAAGCCCTCAGGATGGCGATGTTATAGCCCACTCATAACACCTCAGAAAAGGAATGGAACACTACAGGACTTCCAG TCCAAAGTCCAACCTCGCCTCCGAGAAGCATCCAAAAGCAGACTCCAGCTTTTTAAAGATGACCCAAAGTGA

>saiBoli

ATGCAGCAAGCCGACTCCGAGCAGCCCTCCAAGCGGCCCGTTCGCGATGACAGCCCGAGAACCCCCCAAAACCCCTTCCGAGAGGCAGACAGGTCCTTGGGCCCGGA ACTCCATCCCGACTACAAGACTGGGGTCCGAGCAGGTTGCTCCTTCCAGCCGCGTGGCTTCAAAGAGCCGGAGCTGATGAAGAACATCCGAGAAAATAAAATCAC AGGCTCATTACTGCCCTGTCTTATGAGTCTCATTTTTGAAAATCTTGGAGTAAGTTCCTTGTGGGAGAGGAAGAGGCTGCTTAGTTATATCCAGCGAATGAGTCAAATCCACAT TGATACAATGAAGTAATTAATGATCCTATCCATGGCCACATTGAGCTCCACCCTCCTCCTCATCCGAATCATTGATACGCCCTCAATTTCAACGCTTCCGATATCAAAACAGCT GGGAGCGGTTATTATGTTTTCCAGGAGCTTACACAATCGATTGAGCATAGTCTAGGGTGGGGTATTGGCAGGATGTCTAGTGTGAAAAACAACCCAG AGCTCAGATAAAGTGAACGAGATATGCTCTGTGTTCCAGATTGCTGGGCTTTGTCATGATTTGGTCAATTTGGTCAATTTGGCCATTTTCTCACATGTTTGTATGGACGATTATTTCCACTTGTCT GCCCGAGGTTGAAATGGACACATGAACAAGGCTCAGTTAAGATTTTGGAGGACTTAACTAATTTCAATGGAACTCAAGGCTGTCTATGGAAGAAAGCTTCTTTATGAGATAGT GATATTTGCTTTATTAAGGAACAAATTTGCAAGGACCCTTGAATCACCTATCAAAGTATCTTTTGGCCATATAAAGGGCGCTCAAAGGAAAAGCTTCTTTATGAGATAGT GCTAATAAAGAAATGGCAATTTGATGTGGACAAAGTGGGATTTTGGCCAGGGACTGCCATCATCTTGGAAATCCAAAATAATTTGATTACAAGCGTTTTAAAGTTTGGCCGT GTCTGTGAAGTGAAGAAGCAAGTTGATATTTGACTAGAGATAAAGAAATGGAATTTGAAATCTGTATGACATGTTCCACACTGTTCCACCTGTTTACACCGTAGAGCTTATCAACAAAA GTTGGCAACATCATTGATACAATGATTACAGATGCAATTCCTCAAAGCAGCCCTCAGATAGAGATGACAGGACTGAAAGGAAAGAAGTATGATGATTTCTACAGCAATTTGATGAC ATGGAAGCCACTACATAAGCTAAGCTAACATTTTTCTGGAGATTTTAACTCTACTGATGTTTGAAGGCTTCAAAGGCTGAAAGAAAGTATTAAAAGCTTAAACCCGTAAGT AAAGCTGAAGGCTGAACATTTTATAGTGGATTTATCAACATGGATTATGGAATGCAAGACAAAGAAATGATCATGTTGATTTCTATTGTAAGAGTGAACCCAGCAAGG

ATAATGATTAATAAAACAGGTTCCAGACTTCGCCAGAGAGATTTGCAGAGCAGTGATTCAGAGTACTGTAAAGAAGACAGATGCCAAGAGTTTTGATGCTGCACAAC  
AACATTTTGTTCAGTGTTCGAGCAAAATTTCCACAGCCGAGGATGGCGTGTGTAGCCCACTATAACACCTCAGAAAGATGAATGGAAGTACAGGGCTTCAGCC  
CAAAGTCCAGCTCGCCGCGGAGAGCATCAAAGCAGACTCCAGCTTTTTAAGGATGACCCGGTAT-A

>papAnu2

ATGCAGCAAGCGACTCCGACCAGCCCTCCAAGCGCCCCGTTTTCGATGACAGCCCAAGAACCCCTCAAGCACCCCTCCGCGAGAGCAGACTGGTCCCGGGCCCTGGA  
ACTCCATCCGACTACAAGACATGGGGTCCGGAGCAGGTGTGCTCCTCCAGCGCGGTGGCTTTGGAGAGCCCGGCGCTGTCAAGAACATCCGAGAAACAACACAGG  
GCATTTACTCCCTGCTTGTAGTCTCATTGAAAAATCTTGGAGTAAGTTCTTGCGGGAGAGGAAGAAGCTGCTTAGTTATATCCAGCGATTGGGTCAAATCCAGTTGA  
TACAATGAAGGTTAATAATGATCCTATCCATGGCCACATTGAGCTCCACCTCCTCCTCGTCCGAATCATTGACACACCTCAATTTCAACGTCTTCGATACATCAACAGCTGGG  
AGGTGGTTACTATGTTTTCCAGGAGCTTCACACAATCGATTGAGCATAGTCTAGGGGTGGGGATCTAGCAGGATGCTAGTTTCCGCGCCCTGGGTGAAAAACAACAGAG  
CTGCAGATAAGTGAACGAGATTTCTCTGTGTTACAGATTGCTGGACTTTGTCATGATCTCGTtACATGATGGCCATTTTTCACATGTTTGTAGGACGATTTATCCACTGCTGCC  
CGGAGGTGAAATGGACGCATGAACAAGGCTCAGTTATGATGTTTGGACACCTTAAATTTCTAATGGAATCAAGCTGTCTGGAACACTATGTTCTCCTCCTGAAgaagatttt  
gctttacaAGGAACAATTTGATGACCACCTTGAATCACCTGTCAAAGGTTTGTGGCCATATAAAGGGCGTCTGAAAGGAAAGGCTTCTTTATGAGATAGTGTCTAATAAAAA  
GAAATGGCATTGAtgggacaaatgggatttttCCAGGGACTGCCATCATCTTgaaatccaaataatgtttgattacaAGCGTTCATTAAGTTTGCCCGTGTCTGTGAAGTAGACAATGAGTTGC  
GTATTTGTGCTAGAGATAAGGAAGTTGGAACCTGTATGACATGTTCCACACTCGCAACTCTTTACACCGTAGAGCTTATCAACACAAAGTTGGCAACATTATTGATACAATGA  
TTACAGATGCTTCCCTTAAAGCAGACAACATATAGAGATTACAGGTCGGAGGAAAGGATTCGCAATTTCTACAGCAATGATGACATGGAAAGCCTATACATAAAGTCAAGC  
ATAACATTTTTTCGAGGATTTTATACTCTACTGCCAAAATGAAAGACGCAGgagagttttaaacaatgaataCCGTAATCTATTTCAAGTATGTTGGGTGAGACCCGCAACGAGGaa  
caagaaagaattaaagGAGGACTGAATCTTCCAAAGAGGTTGCCGCTGCTAAACCAGAAATGCTGGAAGTAAACCTGGAAGTTAGAGATTTAGAGATTGATGAGGTTATC  
AACATGGATTATGGAATGCAAGAAATAATCCAATGATCATGTTAGCTTCTATTGTAAGACTGACCCCAACAGCAATCAGGATTACGAAAAACAGggtttcACGACTTCTGCC  
AGAGAAAATTTGCAGAGCAGTATTGCGATATATTGTAAGAAGATGGACAGAAGAGTTTGTATGCCGCAAAACAACATTTTGTTCAGTGGTGCAGACAGAAAATTTACCA  
AGCCTCAGGATGGCGATGTTATAGCCCACTATAACACCTCAGAAAAAGGAATGGAACACTATAGGACTTCAGTCCAAAGTCCAACCTGCCTCCGAGAAAGCTCCAAAAGCAG  
ACTCCAGCTTTTTAAGATGACCAAGGTGA

>hg38

ATGCAGCGAGCCGATTCGAGCAGCCCTCCAAGCGTCCCCGTTGCGATGACAGCCGAGAAACCCCTCAACACCCCTTCCGCGAGAGCAGACTGGTCCCGGGCCTGGA  
ACTCCATCCGACTACAAGACATGGGGTCCGGAGCAGGTGTGCTCCTCCTCAGCGCGGTGGCTTTGAAGAGCCGGTGTCTGTCAAGAACATCCGAGAAAATGAAATCAC  
AGGCGCATTACTGCTTGTCTTGTAGTCTCGTTTTGAAAAATCTTGGAGTAAGTTCTCTGGGGAGAGGAAGAAGCTGCTTAGTTATATCCAGCGATTGGTCAAATCCAGC  
TTGATACAATGAAGGTAATTAATGATCCTATCCATGGCCACATGAGCTCCACCTCCTCCTCGTCCGAATCATTGATACACCTCAATTTCAACGTCTTCGATACATCAACAGCT  
GGGAGGTGGTACTATGTTTTCCAGGAGCTTCACACAATCGATTTGAGCATAGTCTAGGGGTGGGATATCTAGCAGGATGCTAGTGTCCAGCCTAGGGTGAAAAACA  
GAGCTGCAGATAAGTGAACGAGATGTTCTGTGTTGAGATTGCTGGACTTTGTCATGATCTCGTTCATGGCCATTTTCTCACATGTTTGTAGGACGATTATTCCACTTGT  
CGCCCGGAGGTGAAATGGACGCATGAACAAGGCTCAGTTATGATGTTGGACACCTTAAATTTCTAATGGAATTAAGCCTGTCAATGGAACAAATATGGTCTCATCCCTGAAGA  
AGATATTTGCTTTAAAGGAACAATTTAGAGACCTTGAAGACCTTGAAGCAATGATTTGCTCAATATAAAGGGCGCTGCTAGTGTCAAGCAACTCCATTTGATGAGTATG  
ATCTAATAAAGAATAAGGATGATGTTGGCAAAATGGGATTTTTGCGAGGACTGCCATCATCTGGAATCCAAAATAAATTTGATTACAAGCGCTTTAATGATTTTTGCCGCT  
GTCTGTAAGTAACTAAACAGCTTGTGGTATGTTGCTAGAGATAAGGAAGTGGAAATCTGATGACATGTTCCACACTGCAACTCTTTACAGCACTTCATTCACACA  
GTTGGCAACATTTATGATACAATGATTACAGATGCTTTCTCAAAGCAGATGACTACATAGAGATTACAGGTGCTGGAGGAAAAAAGTATCGCATTTCTACAGCAATTGACGAC  
ATGGAAGCCTATACTAAGCTGACAGATAACATTTTTCTGGAGATTTTTACTCTACTGATCCCAAATGAAAGAGCAGCAGAGAGATTTTAAACAATTAATGAAATCCGTAATCTAT  
TCAAGTATGTTGGGTGAGACGCAGCCAAACAGGACAATAAAGATTAAAAGGGAGGACTATGAATCTCTTCCAAAAGAGGTTCCGAGATTTTAAAGGAGGTTGATGAGTATG  
GAACTGAAAGGCTGAAGATTTTTAGTGGATGTTTCAACATGGAATTTGGAATGCAAGAAAGAAATCCAATGATCATGTTAGCTTCTATTGTAAGACTGCCCCCAACAGCAGC  
AATCAGGATTAATAAAACAGGTTTCCAACTTCTGCCAGAGAAATTTGCAGAGAAATTTGACAGCAGCTGATTCGAGTATATTGAAGAAGGTGGACAGAAAGTTTTGTATGCCGCAAGC  
AATATTTTGTTCAGTGGTGTGACAGACAATAATTTCAACAGCCGAGGATGGCGATGTTATAGCCCACTATAACACCTCAGAAAAAGGAATGGAACGACAGTACTTCAGTC  
CAAAATCCAACCTCGCCTCCGAGAAGCATCCAAAAGCAGAGTCCAGCTTTTTAAGATGACCCAAGTGA

>macFas5

ATGCAGCAAGCGACTCCGACCAGCCCTCCAAGCGTCCCCGTTTTCGATGACAGCCCAAGAACCCCTCAACACCCCTTCCGCGAGAGCAGACTGCTCCCGGGCCCTGGAA  
CTCCATCCGACTACAAGACATGGGGTCCGGAGCAGGTGTGCTCCTCCTCAGCGCGGTGGCTTTGAGAGCCGGCGCTGCTGGAAGAACATCCGAGAAAACAATAACACA  
GGCGCATTACTGCCCTGTCTTGTAGTCTCATTTTTGAAAAATCTTGGAGTAAGTTCTTGGGGAGAGGAAGAAGCTGCTTAGTTATATCCAGCGATTGGGTCAAATCCAGCT  
TGATACAATGAAGGTTAATAATGATCCTATCCATGGCCACATGAGCTTCACCCCTCCTCGCTCCGAATCATTGACACACCTCAAATTTCAACGTCTTCGATACATCAACAGCT  
GGGAGGTGGTACTATGTTTTCCAGGAGCTTCACACAATCGATTTGACACTGACTAGGGGTGGGATATCTAGCAGGATGCTAGTGTCCAGCACTTTACAGCCCTGCTTCCGCGCCTGGGTGAAAAACA  
GAGCTGCAGATAAGTGAACGAGATTTCTGTGTTGAGATTGCTGGACTTTGTCATGATCTCGTTCATGGCCATTTTCTCACATGTTTGTAGGACGATTATTCCACTTGAAG  
CGCCCGGAGGTGAAATGGACGCATGAACAAGGCTCAGTTATGATGTTGAGCACCTTAAATTTCTAATGGAATCAAGCCTGCTAGTGAACACTGTTTATGAGTATG  
AGATATTTGCTTTATCAAGGAACAATAATGAGGACCACTTGAATCACCTGTCAAAGGTTTGTGGCCATATAAAGGGCGTCTGAAAGGAAAGGCTTCTTTATGAGATAGT  
GTCTAATAAAGAATAAGGATGATGTTGGCAAAATGGGATTTTTGCGAGGACTGCCATCATCTGGAATCCAAAATAAATTTGATTACAAGCGCTTCAATGATTTTTGCCCG  
TGTCTGTAAGTGAAGTGAACAATGAGTTGCGTATTTGTGAGAGATAAGGAAGTTGGAAACCTTTATGATCATGTTCCACACTGCAACTCTTTACAGCCCTGATGATTTCAACA  
AGTGGCAACATTTATGATACAATGATTACAGATGCTTTCTCAAAGCAGACGACTATATAGAGATTACAGGTTGCTGGAGGAAAAAAGTATCCGATTTCTACAGCAATTTGATGA  
CATGGAAGCCTATAAAGCTGACAGATAACATTTTCTGGAGATTTTTACTCTACTGATCCCAATTTGAAAGACGACAGGATTTGAAAGACGACAGAGATTTTAAACAATAATTTGATTAACCGTAATCTA  
TTCAAGTATGTTGGTGAGACCCAGCCAACGGAACAAGTAAAGATTTAAAGGAGGACTATGAATCTCTTCCAAAAGAGGTTGCCGCTGCTAAACCCAGAGAAATGCTGGAAG  
TAAACTGGAGGCTGAAGATTTTTATAGTGGATTTATCAACATGGAATTTGGAATGCAAGAAAATAATCCAATTTGATCATGTTAGCTTCTATTGTAAGACTGACCCCAACAC  
CAATCAGGATACGAAAAACAGGTTTCCAGACTTCTGCCAGAGAAATTTGCAAGCAGCTGATTCGAGTATATTGTAAGAAGTGGACAGAAGAGTTTTGTATGCCGCAAAA  
CAACATTTTTGTTCAGTGGTGCAGACAGAAAATTTCAACAGCCTCAGGATGGCGATGTTATAGCCCACTATAACACCTCAGAAAAAGGAATGGAACGACAGTACTTCAGT  
CCAAAGTCCAACTCGCCTCCGAGAAGCATCCAAAAGCAGAGTCCAGCTTTTTAAGATGACCCAAGTGA

>nomLeu3

ATGCAGCGAGCCGACTCCGAGCAGCCCTCCAAGCGGCCCCGTTTTCGATGACAGCCCGAGAAACCCCTCAAGCACCCCTTCCGCGAGAGGCAGACTGGTCCCGGGCCTGG  
AATCCATCCGACTACAAGACATGGGGTCCGGAGCAGGTGTGCTCCTCCTCAGCGCGGTGGCTTTGAGAGCCGGCGCTGCTGGAAGAACATCCGAGAAAACAATAACACA  
CAGGCTCATTACTGCCCTGTCTGTAGGATCTCATTTTTGAAAAATCTTGGAGTAAGTTCTCTGGGGAGAGGAAGAAGCTGCTTAGTTATATCCAGCAATTTGGGTCAAATCCAGC  
ATTGATACAATGAAGTAAATTAATGATCCTATCCATGGCCACATGAGCTCCACCTCCTCGTCCGAACTAATTGATACAGCACTCAATTTGATACAGCTTCGATACATCAAC  
CTGGGAGGTGGTACTATGTTTTCCAGGAGCTTCACACAATCGATTTGAGCATAGTCTAGGGGTGGGATATCTAGCAGGATGCTAGTTCCGCGACTGGGTGAAAAACA  
CAGAGCTGCAGATAAGTGAACGAGATATTCTGTGTTGAGATTGCTGGACTTTGTCATGATCTCGTTCATGGCCATTTTCTCACATGTTTGTAGGACGATTATTCCACTTG  
CTCGCCAGAGGTGAAATGGACGCATGAACAAGGCTCAGTTATGATGTTGAGCACCTTTAATTTCTAATGGAATCAAGCCTGTCAATGGAACAAATGATGTTCCAGCA  
AAGATATTTGCTTTATCAAGGAACAATAATGAGGACCACTTGAACCACTGTCAAAGATTTATTGTTGGCCGTATAAAGGGCGTCTGAAACAACAAAGCTTCTTTATGAGATA  
GTGCTCAAGCAAAAGAAATGGCATTTGATGGGACAAATGGGATTTTTGCGAGGACTGCCATCATCTGGAATCCAAAATAAATTTGATTACAAGCGCTTTATTAAGTTTGGC  
CGTGTCTGTAAGTAGACAATGAGTTGCATATTTGCTAGAGATAAGGAAGTTGGAAATCTGATGACATGTTCCACACTGCAACTCTTTACACCGTAGAGCTTATCAACAC  
AAAGTTGGCAACATTTATGATACAATGATTACAGATGCTTTCTCAAAGCAGACGACTACATAGAGATTACAGGTGCTGGAGGAAAAAAGTATTCGCATTTCTACAGCAATGAC  
GACATGGAAGCCTATACTAACTGACAGATAACATTTTTCTGGAGATTTTTACTCTACTGATCCCAATTTGAAAGACGACGAGAGATTTTAAACAATAATGAAATCCGTAATC  
TATTCAGTACGTTGGTGAGACCCAGCCAACGGGCAAGATAAAGATTAAAAGGGAGGACTATGAATCTCTTCCAAAAGAGGTTGCCAATGCTAAACCCAAAGATTTGTCTGAGA  
GTGAAACTGAAGGCTGAAGATTTATAGTGGATGTTATCAACATGGAATTTGGAATGCAAGAAAATAATCCAATTTGATCATGTTAGCTTCTATTGTAAGACTGACCCCAACAC  
CAACATTTTTGTTCAGTGGTGCAGACAGAAAATTTCAACAGCCGAGGATGGCGATGTTATAGCCCACTATAACACCTCAGAAAAAGGAATGGAACGACGACTTCAG  
GCCAAAACCCCACTCGCCTCCGAGAAGCATCCAAAAGCAGAGTCCAGCTTTTTAAGATGACCCAAGTGA

>ponAbe2

ATGCAGCGAGCCGACTCCGAGCAGCCCTCCAAGCGGCCCCGTTTTCGATGACAGCCCGAGAAACCCCTCAAGCACCCCTTCCGCGAGAGGCAGACTGGTCCCGGGCCTGGA  
ACTCGATCCGACTACAAGACATGGGATCCGGAGCAGGTGTGCTCCTCCTCGGGCGCGGTGGCTTTGAAGAGCCGGCGCTGCTGGAAGAACATCCGAGAAAACAATAACACA  
AGGCGCATTACTGCCCTGTCTTGTAGTCTCATTTTTGAAAAATCTTGGAGTAAGTTCTCTGGGGAGAGGAAGAAGCTGCTTAGTTATATCCAGCGATTGGTCAAATCCACA  
TTGATACAATGAAGGTAATTAATGATCCTATCCATGGCCACATGAGCTCCACCTCCTCGTCCGAACTAATTGATACAGCACTCAATTTGATACAGCTTCGATACATCAACAGCT  
GGGAGGTGGTACTATGTTTTCCAGGAGCTTCACACAATCGATTTGAGCATAGTCTAGGGGTGGGATATCTAGCAGGATGCTAGTGTCCGCGACTGGGTGAAAAACA  
GAGCTGCAGATAAGTGAACGAGATATTCTGTGTTGAGATTGCTGGACTTTGTCATGATCTCGTTCATGGCCATTTTCTCACATGTTTGTAGGACGATTATTCCACTTGT  
CGCCCGGAGGTGAAATGGACGCATGAACAAGGCTCAGTTATGATGTTGAGCACCTTAAATTTCTAATGGAATCAAGCCTGCTAGTGAACAAATATGGTCTCATCCCTGAAGA  
AGATATTTGCTTTGTCAAAGGAACAATAATGAGGACCACTTGAATCACCTGTCAAAGTATCTAGTGGCCATATAAAGGGCGTCTGAAACAACAAAGGCTTCTTTATGAGATAGT  
GTCTAATAAAGAATAAGGATGATGTTGAGGACCACTTGAATCACCTGTCAAAGTATCTAGTGGCCATATAAAGGGCGTCTGAAACAACAAAGGCTTCTTTATGAGATAGT  
GTCTAATAAAGAATAAGGATGATGTTGAGGACCACTTGAATCACCTGTCAAAGTATCTAGTGGCCATATAAAGGGCGTCTGAAACAACAAATTTGATTAACAGGCTTTAATGATTTTTGCCGCT  
GTCTGTAAGTAGACAAATGAGTGGCTATTTGCTAGAGATAAGGAAGTTGGAATCTGATGACATGTTCCCAACTCGCAACTCTTACACCTGAGACTTATCAACACA  
TTTGCGCAACTTTTGTTCAGTGGTGCAGACAGAAAATTTCAACAGCCGAGGATGGCGATGTTATAGCCCACTATAACACCTCAGAAAAAGGAATGGAACGACGACTTCAG  
GCCAAAACCCCACTCGCCTCCGAGAAGCATCCAAAAGCAGAGTCCAGCTTTTTAAGATGACCCAAGTGA



GAAACTGAAGGCTGAAGATTTTATAGTGGATGTTTCAACATGGATTAGGAATGCAAGAAAGATCCAAATTTGATCAGGTTAGCTTATATTGTAAGACTGCCCCCAACAGAGC  
AATCAGGATTTACTAAAACCAGGTTTCCAACTTCTGCCAGAGAAAATTTGCAGAGCAGCTGATCGAGTATATTGTAAGAAAGGTTGGACAGAAAGATTTGATGCCGCAAAAC  
AACATTTTGTTCAGTGGTGTGCAGACAGAAATTTCCAAAGCCGAGGATGGCGAGGTTATAGCTCCACTATAACACCTCAAAAAAGGAATGGAATGACAGTACTTTCAGTC  
CAAAATCCAACTCGCCTCCGAGAAGCATCCAAAAGCAGAGTCCAGCTTTTAAAGATGACCCAGTGTGA

>rhMac3

ATGCAGCAAGCCGACTCCGACAGCCCTCCAAGCGTCCCGGTTTCCGATGACAGCCCAAGAACCCCTCAAAACACCCCTCCGACAGAGGAGAGCTGCCCTCCCGGGCCTGGAA  
CTCCATCCGACTCAAGACATGGGGTCCGGAGCAGGTTGGCTTCTCCAGGCGTGGTGGCTTTGAGAGGCGCGCTGTAAGAAGATCCGAGAAACATAACACA  
GGCGCATTACTGCCGTCTGTGATGAGTCTATTTTGAANAATCTGGAGTAAGTTCCTTGGGGGAGAGGAAGAGCTGCTTATGTTATATCCAGCGATCGGGTCAAATCCAGT  
TGATACAATGAAGGTTTAAATGATCCTATCCATGGCCACATTTGAGCTCCACCCCTCCTCGTCCGAATCATTGACACACCTCAAITTCACAGCTTCTCGATACATCAAACAGCT  
GGGAGGTTGTTACTATGTTTTCCAGGAGCTTACACAATCGATTTGAGCATAGCTAGGGGTTGGGTATCTAGCAGGGTGTCTAGTTCGCGCCCTGGGTGAAAAACAACCA  
GAGCTGCAGATAAAGTGAACGAGATTTCTGTGTTGAGATTGCTGGACTTTGTCTATGATCTCGGTCATGGGCCATTTTCTCACATGTTTGTGAGCAGATTTATCCACTGTCT  
CGCCGGAGGTGAAATGGACGCATGAACAAGGCTCAGTTATGATGTTTGGACCCCTTATAAATCTAATGGAATCAAGCCTGTCTGGAACACTATGGTCTCATCCCTGAAGA  
AGATATTTGCTTTATCAAGGAACAAATTTGAGGACCCTTGAATCACCTGTCAAAGGTTTGTGGCCATATAAAGGGCGTCTGAAAGGAAAGCTTCTTTATGAGATAGT  
GTCTAATAAAAAGAAATGGCATTGATGTGGACAATGGGATTTTGGCAGGAGCTGCCATCATCTTGGAAATCCAAAATAATTTGATTACAAGCGTTCATTAAAGTTTGGCCG  
TGCTGTGAAGTAGACAATGGTTGCGTATTTGCTAGAGATAAGGAATTTGAAACCTGTATGATCATCTTCCACACTCGCAACTCTTACACCGTAGCCTTATCAACACA  
AGTTGGCAACATTTATGATACAATGATACAGATGCTTCTCAAGAGCAGACGACTATATAGAGATTACAGGTTGCTGGAGGAAAAAAGATGCGATTTCTACAGCAATTTGATGA  
CATGGAAGCCTATACTAAGCTGACAGATAACATTTTCTGGAGATTTTACTGCTACTGATCCAAAATTTGAAAGACACGAGAGATTTTAAAAAATAATGAATACCGTAACTA  
TTCAAGTATGTTGGTGGAGACCAGCCAACGGAACAAGTAAAGTAAAAAGGAGGACTATGAATCTCTCAAAGAGGTTGCCGCTGCTAAACCCAGAGAATTGCTGGAAG  
TAAACTGGAGGCTGAAGATTTTATAGTGGATTTATCAACATGGATTGGAATGCAAGAAAAATTAAGTCCAAITTTGATCATGTTAGCTTCTATTGTAAGACTGACCCCAACAC  
CAATCAGGATTACGAAAACCAGGTTTCCACGACTTCTGCCAGAGAAATTTGCAGAGCAGCTGATTCAGGTATTTAGTAAAGAAATGGACAGCAAGGTTGATGTTGCCGCAAAA  
CAACATTTTGTTCAGTGGTGGCAGACAGAAAATTTACCAGCCTCAGGATGGCGATGTTATAGCCCACTATAACACCTCAGAAAAAGGAATGGAACACAGGACTTTCAGT  
CCAAAGTCCAACTCGCCTCCGAGAAGCATCCAAAAGCAGACTCCAGCTTTTAAAGATGACCCAAAGTGA

SERINC3

>panPan1

ATGGGGGCTGTGCTGGGTGCTTCTCCCTCGCCAGCTGGGTTCCATGCCTCTGCAGCGGTGCCTCATGTTTGTGTGTAGTTGCTGTCTAACAGTAAGAATCCACAGTGA  
CTCGCCTCATTTATGCTTTTCACTCTCCTGAGCAGCTGCTGATCCTATATcatgcaagaaagagatggAAACTTACTTGAAGAAGATTCTGGATTTTGTGAAGGGGGATTTAAAA  
TCCATGAGGCTGATATAAATGCAGATAAAGATTGTGATGTGCTGGTTGGTTATAAAGCTGTGTATCGGATCAGCTTTGCCATGGccatctttttctgtctttctctcgtTATGTTCAAAGTAA  
AAACAAGTAAAGATCTCCGAGCGGCGAGTACACAATGGgittTGGTCTTCAAAGTTGCTGCCCTTATTGGAATCATGTTGGATCTTTCTACATCCTGGGGGCTATTTTCAGCTC  
AGTCTGGTTTGTGGTGGCATTGAGGGGCGCCCTTCCATCCTCAATCAGCTGGTGTGGTATGATTTTGTCTATTCTTGGAAATGAATCATGGGTAATCGAATGGAAAG  
AAGGAAACCAAGGTTTGGTATGCTGCTTTACTGTCTTCAAGATGCTCTTTATATCCTGCAATCGTCTGTGTGGGCTGCTCTATACATATTAACACCAACCCAGATGGCT  
GCACGAAACCAAGTCTTTCATCAGTATTAACCTGATCCTTTGCGTGTGGCTCTATTATATCGATCCACCCAAAAATTCAGGAACACCCAGCTGCTCCGCGCTTTCGAGT  
CCTCCCTCATACCCCTCTACACTATGTACCTCACCTGGTCAGCCATGTCCAATGAACCTGatCGTTCTGCAACCCCAACCTGATGAGCTTTATTACAGCATAACTGCACCA  
CCCTCGCTCCTGGAATTAACACTGCTGTGGTCCCTACCCCTACTCCACCATCAAGAGTGGGGTCTTACTGGATTAGATATTTTATGGACTGTTTGTCTTGTCTTGTCC  
TTTTGATTTAGCATCCGCACTTCCACTAATAGCCAAAGTAGACAAGCTGACCCCTGACAGGAGTGCAGGAGTGCAGAGCTCATCTTGGTGATACAACCTACCAATGGTCCAGTATGAA  
GAAGATGGACAGCCTCGGCGGGCTGTGGACAACGAGAAAGAGGAGTGCAGTATAGCTACTCCTTATCCACCTCATGCTCTGCTGGCTTCTTGTACATCATGATGACCC  
TGACCAGCTGTGACAGCCTGATGCAAGTTCAGAGTTCAGAGCAAGTGGCCAGCTGTGTGGTCAAGATCAGCTCCAGCTGGGTGCTGCTCCTGCTTTACGCTGTGGAC  
CCTTGTGGCTCCACTGTCTCACCAGTGGGACTTTCAGCTGA

>hiRox1

ATGGGGGCTGTGCTGGGTGCTTCTCCCTCGCCAGCTGGGTTCCATGCCTCTGCAGCGGTGCCTCATGTTTGTGTGTAGTTGCTGTCTAACAGTAAGAATCCACGTTGA  
CTCGCCTCATTTATGCTTTTCACTCTCCTGAGCAGCTGCTGATCCTATATCATGCAGAGAAAAGAGATGGAACCTTACTTGAAGAAGATTCTGGATTTTGTGAAGGGGGAT  
TTAAAATCCATGAGGCTGATATAAATGCAGATAAAGATTGTGATGTGCTGGTTGGTTATAAAGCTGTGTATCGGATCAGCTTTGCCATGGCCATCTTTTTCTTGTCTTTCTCT  
GCTCATGTTGAAAGTAAAAACAAGTAAAGATCCCGAGCAGCAGTACACAATGGGTTTGGTCTTCAAATGCTGCCCTTATTGGAATCATGTTGGATCTTTCTACATCCC  
TGGGGGCTATTTTCAGCTCAGTCTGGTTTGTGTTGGCATGATAGGGGCGCCCTTTCATCCTTATTTCAGCTGGTGTGTGGTACACTTTGCTCATTCTTGGAAATGAATCAT  
GGGTAATCGAATGGAAGAAGGAAACCCAAAGGTTGGTATGCTGCTTTACTGTCTTTCACAGCGCCCTTTTATATCCTGCAATCATCTGTGTGGGCTGCTCTACATACAT  
ACACCAAAACAGATGGCTGCACAGAAAACAAGTCTTTCATCAGTATTAACCTGATCCTTTGCGTGTGGCTTCTATTATATCGATCCACCCAAAAATTCAGGAACACCAGCCTC  
GCTCCGGCCTTTGCAAGTCTGCTTCAACCTCTACACTATGTACCTCACCTGTGACCCATGACCCATCAAGAGTGGGTTCTGCTGCAACCCAGCTGATGAGCTTTATT  
ACACGCATAACTGCACCAACACTGGCTCCTGGAATTAACCTGCTGTGGTCCCTACCCCTACTCCACCATCAAGAAATGGGTTCTTACTGGATTAGATATAATTTATGGACTG  
TTTGTCTTTGCTCTGCCTTTGATTTAGCATCCGCACTTCCACTAATAGCCAAGTAGACAAGCTGACCCCTGTCAAGGAGTGACAGCGCTCATCCTTGGTATACAACCTACC  
AATGTGGCAGTGTGAAGAAGATGGACAGCCTCGCGGGCTGTGGACAACGAGAAAGAGGAGTGCAGTATAGCTACTCCTTATCCACCTCATGCTCTGCTTGGCTTCC  
TGTACATCATGATGACCCAGCAGCTGGTACAGCCCTGATGCAAAATTTAGAGCATGACCAGCAAGTGGCCAGCTGTGTGGTCAAGATCAGCTCCAGCTGGGTGCTGCC  
CTGCTTTACGCTGGACCTTGTGGCTCCACTGTCTCACCAGTGGGACTTCAGCTGA

>gorGor3

ATGGGGGCTGTGCTGGGTGCTTCTCCCTCGCCAGCTGGGTTCCATGCCTCTGCAGCGGTGCCTCATGTTTGTGTGTAGTTGCTGTCTAACAGTAAGAATCCACAGTGA  
CTCGCCTCATTTATGCTTTTCACTCTCCTGAGCAGCTGCTGATCCTATATCATGCAGAGAAAAGAGATGGAACCTTACTTGAAGAAGATTCTGGATTTTGTGAAGGGGGAT  
TTAAAATCCATGAGGCTGATATAAATGCAGATAAAGATTGTGATGTGCTGGTTGGTTATAAAGCTGTGTATCGGATCAGCTTTGCCATGGCCATCTTTTTCTTGTCTTTCTCT  
GCTTATGTTCAAAGTAAAAACAAGTAAAGATCTCCGAGCGGCAGTACACAATGGGTTTGGTCTTCAAATGCTGCCCTTATTGGAATCATGTTGGATCTTTCTACATCCC  
TGGGGGCTATTTTCAGCTCAGTCTGGTTTGTGTTGGCATGATAGGGGCGCCCTTTCATCCTCATTTCAGCTGGTGTGTGGTATTTGCTCATTCTTGGAAATGAATCAT  
GGGTAATCGAATGGAAGAAGGAAACCCAAAGGTTGGTATGCTGCTTTACTGTCTTTCACAGCGCCCTTTTATATCCTGCAATCATCTGTGTGGGCTGCTCTACATACAT  
ACACCAAAACAGATGGCTGCACAGAAAACAAGTCTTTCATCAGTATTAACCTGATCCTTTGCGTGTGGCTTCTATTATATCGATCCACCCAAAAATTCAGGAACACCAGCCTC  
GCTCCGGCCTTTGCAAGTCTGCTTCAACCTCTACACTATGTACCTCACCTGTGACCCATGACCCATCAAGAGTGGGTTCTGCTGCAACCCAGCTGATGAGCTTTATT  
ACACGCATAACTGCACCAACACTGGCTCCTGGAATTAACCTGCTGTGGTCCCTACCCCTACTCCACCATCAAGAAATGGGTTCTTACTGGATTAGATATAATTTATGGACTG  
CAATGGTGCAGTGTGAAGAAGATGGACAGCCTCGCGGGCTGTGGACAACGAGAAAGAGGAGTGCAGTATAGCTACTCCTTATCCACCTCATGCTCTGCTTGGCTTCC  
CTTGTACATCATGATGACCCAGCAGCTGGTACAGCCCTGATGCAAAATTTAGAGCATGACCAGCAAGTGGCCAGCTGTGTGGTCAAGATCAGCTCCAGCTGGGTGCTGCC  
CTCCTGCTTTACGCTGGACCTTGTGGCTCCACTGTCTCACCAGTGGGACTTCAGCTGA

>panT04

ATGGGGGCTGTGCTGGGTGCTTCTCCCTCGCCAGCTGGGTTCCATGCCTCTGCAGCGGTGCCTCATGTTTGTGTGTAGTTGCTGTCTAACAGTAAGAATCCACAGTGA  
CTCGCCTCATTTATGCTTTTCACTCTCCTGAGCAGCTGCTGATCCTATATCATGCAGAGAAAAGAGATGGAACCTTACTTGAAGAAGATTCTGGATTTTGTGAAGGGGGAT  
TTAAAATCCATGAGGCTGATATAAATGCAGATAAAGATTGTGATGTGCTGGTTGGTTATAAAGCTGTGTATCGGATCAGCTTTGCCATGGCCATCTTTTTCTTGTCTTTCTCT  
GCTTATGTTCAAAGTAAAAACAAGTAAAGATCTCCGAGCGGCAGTACACAATGGGTTTGGTCTTCAAATGCTGCCCTTATTGGAATCATGTTGGATCTTTCTACATCCC  
TGGGGGCTATTTTCAGCTCAGTCTGGTTTGTGTTGGCATGATAGGGGCGCCCTTTCATCCTCATTTCAGCTGGTGTGTGGTATTTGCTCATTCTTGGAAATGAATCAT  
GGGTAATCGAATGGAAGAAGGAAACCCAAAGGTTGGTATGCTGCTTTACTGTCTTTCACAAGTGCCTTTTATATCCTGCAATCATCTGTGTGGGCTGCTCTACATACAT  
ACACCAAAACAGATGGCTGCACAGAAAACAAGTCTTTCATCAGTATTAACCTGATCCTTTGCGTGTGGCTTCTATTATATCGATCCACCCAAAAATTCAGGAACACCAGCCTC  
GCTCCGGCCTTTGCAAGTCTGCTTCAACCTCTACACTATGTACCTCACCTGTGACCCATGACCCATCAAGAGTGGGTTCTGCTGCAACCCAGCTGATGAGCTTTATT  
ACACGCATAACTGCACCAACCTGGCTCCTGGAATTAACCTGCTGTGGTCCCTACCCCTACTCCACCATCAAGAAATGGGTTCTTACTGGATTAGATATAATTTATGGACTG  
TTTTGCTTTGCTCTGCCTTTGATTTAGCATCCGCACTTCCACTAATAGCCAAGTAGACAAGCTGACCCCTGTCAAGGAGTGACAGCGCTCATCCTTGGTATACAACCTACC  
TGTACATCATGATGACCCAGCAGCTGGTACAGCCCTGATGCAAAATTTAGAGCATGACCAGCAAGTGGCCAGCTGTGTGGTCAAGATCAGCTCCAGCTGGGTGCTGCC  
CTGCTTTACGCTGGACCTTGTGGCTCCACTGTCTCACCAGTGGGACTTCAGCTGA

>calJac3

ATGGGGGCTGTGCTGGGTGCTTCTCCCTCGCCAGCTGGGTTCCATGCCTCTGCAGCGGTGCCTCATGTTTGTGTGTAGTTGCTGTCTAACAGTAAGAATCCACGTTGA  
CTCGCCTCATTTATGCTTTTCACTCTCCTGAGCAGCTGCTGATCCTATATCATGCAGAGAAAAGAGATGGAACCTTACTTGAAGAAGATTCTGGATTTTGTGAAGGGGGAT  
TTAAAATCCATGAGGCTGATATAAATGCAGATAAAGATTGTGATGTGCTGGTTGGTTATAAAGCTGTGTATCGGATCAGCTTTGCCATGGCCATCTTTTTCTTGTCTTTCTCT  
GCTGATGATAAAGTAAAAACAAGTAAAGATCCTCGAGCAGCAGTACACAATGGGTTTGGTCTTCAAATGCTGCCCTTATTGGAATCATGTTGGATCTTTCTACATCCC  
TGGGGGCTATTTTCAGCTCAGCCTGGTTTGTGTTGGCATGATAGGGGCGCCCTTTCATCCTTATTTCAGCTGGTGTGTGGTATTTGCTCATTCTTGGAAATGAATCAT  
GGGTAATCGAATGGAAGAAGGAAACCCAAAGGTTGGTATGCTGCTTTACTGTCTTTCACAAGTGCCTTTTATATCCTGCAATCATCTGTGTGGGCTGCTCTACATACAT  
ACACCAAAACAGATGGCTGCACAGAAAACAAGTCTTTCATCAGTATTAACCTGATCCTTTGCGTGTGGCTTCTATTATATCGATCCACCCAAAAATTCAGGAACACCAGCCTC  
GCTCCGGCCTTTGCAAGTCTGCTTCAACCTCTACACTATGTACCTCACCTGTGACCCATGACCCATCAAGAGTGGGTTCTGCTGCAACCCAGCTGATGAGCTTTATT  
ACACGCATAACTGCACCAACCTGGCTCCTGGAATTAACCTGCTGTGGTCCCTACCCCTACTCCACCATCAAGAAATGGGTTCTTACTGGATTAGATATAATTTATGGACTG  
TTTTGCTTTGCTCTGCCTTTGATTTAGCATCCGCACTTCCACTAATAGCCAAGTAGACAAGCTGACCCCTGTCAAGGAGTGACAGCGCTCATCCTTGGTATACAACCTACC  
AGTGGTGCAGTGTGAAGAAGATGGACAGCCTCGCGGGCTGTGGACAACGAGAAAGAGGAGTGCAGTATAGCTACTCCTTATCCACCTCATGCTCTGCTTGGCTTCC  
TGTACATCATGATGACCCAGCAGCTGGTACAGCCCTGATGCAAAATTTAGAGCATGACCAGCAAGTGGCCAGCTGTGTGGTCAAGATCAGCTCCAGCTGGGTGCTGCC  
CTGCTTTACGCTGGACCTTGTGGCTCCACTGTCTCACCAGTGGGACTTCAGCTGA

ACGCATAACTGCACCAACCCCTGGCTCCTGGAAATTCACCCGCTGTGATCCCTACCCTATTCCACCATCAAAGAGTGGGTCTTTACTGGATTAGATAATGTTTGGTGGACTG  
TTTGTCTTTTGTCTGCCTTGTGTATTCTAGCATCCGCACTCCAGTCCAGTAAATAGTCAAGTAGACAAGCTGACCTGTGAGGAGTGTAGCGGTGATCCTTTGGTATACAACC  
AATGGTGCCATGATGAAGATGATGGACAGCTCGGGGGCTGGGACAATGAGAAGAGGGAGTGCAATAGTACTTCTTTCCACTTGTATGCTGTGCTGGTCCCT  
TGTACATCATGATGACCCCTGACTGGTGGTACAGCCCTGATGCAAAAGTTTCAGAGCATACACGCAAGTGGCCGGCTGTATGGGTCAAGATCAGCACAGCTGGGTCTGCC  
CCTGCTTTACGCTTGGACCCCTTGTCTCCCAAGTCCGACTTGGATTAAGTGA

>nasLar1

ATGGGGGGCTGTGCTGGGTGTCTTCTCCCTCGCCAGCTGGGTCCATGCCTCTGCAGCGGTGCCTCATGTTTGTGTGTAGTTGTCTAACAGTAAGAATTCACGTTGA  
CTCGCCTCATTTATGCTTTACTTCTCTCTGAGCGCTGTTGTATCCTATATCATGCAGAGAAAAGAGATGAAACAGTACCTGAAAGAGATTCTGGATTTTGTGAAGGGGGAT  
TTAAATCCATGAGGCTGATATAAATGCAGATAAAGATTGTGATGTGCTGGTGGTTATAAAGCTGTGTATCGGATCAGCTTTGCCATGGCCATCTTTTTCTTTTCTCT  
GCTCATGTTGAAAGTAAAACAAGATAAAGATCCCGAGCAGCAGTACACAATGGGTTTTGGTTCTTCAAATTTGCTGCCCTATTGGAATCATGGTTGGATCTTTCTACATCCC  
TGGGGGCTATTTAGCTCAGTCTGGTTTGTGTGGTATGATAGGGGGCCGCCCTTTCATCCTTTATTAGCTGGTGTGTGGTAGACTTTGCTCATTCTTGAATGAATCAT  
GGGTAATCGAATGGAAGAAGGAAACCCAAAGGTTGTGGTATGCCGCTTTACTGTCTTCAACAAGCGCTTTTATATCCTGTCAATCATCTGTGTGGGCTGCTATACATACT  
ACACCAAAACAGATGGCTGCACAGAAAACAAGTTCTTCATCAGTATTAACCTGATCCTTTGCGTGTGGCTTCTGTTATATCGATCCACCAAAAATTCAGGAACACAGCCTC  
GCTCCGGCCTTTGCAGTCTCTCATCACCCCTACACTATGTACCTCACCTGGTACGCCATGTCAAATGAACTGATCGTTCTGCAACCCAGCCCTGATGAGCTTTATT  
ACACGCATAAAGTGCACCAACTGGCTCGGAAATCACTGCTGTGGTCCCTACCCTACCCATCAAAGAATGGGTTTACTGGATTCAGATAATTTATGGACTG  
TTTGTCTTTTGTCTGCCTTTGATTCTAGCATCCGCACTTCCACTAATAGCCAAAGTAGACAAGCTGACCCCTGTCAGGGAGTGACAGCGTATCCTTTGGTATCAACTACC  
AATGGTGGCAGTGAAGAAGATGGACAGCCTCGACGGGCTGTGGACAACGAGAAGAGGGAGTGCAATAGCTACTCCTTTATCCACCTATTGCTGATCCCTTGGTCTGCTCCT  
TGTACATCATGATGACCCCTGAGCAGCTGTGACAGCCCTGATGCAAAAGTTTCAGAGCATGACCAGCAAGTGGCCAGCTGTGTGGTCAAGATCAGCTCCAGCTGGGTCTGCC  
CCTGCTTTACGCTGTGACCCCTTGTGGCTCCACTTGTCTCACCAGTCCGGACTTCAGCTGA

>chlSab2

ATGGGGGGCTGTGCTGGGTGTCTTCTCCCTCGTAGCTGGGTCCATGCCTCTGCAGCGGTGCCTCATGTTTGTGTGTAGTTGTCTAACAGTAAGAATTCACGTTGAC  
TCGCGCTCATTATGCTTTACTTCTCTCTGAGCGCTGTTGTATCCTATCATGCAGAGAAAAGAGATGAAACAGTACCTGAAAGAGATTCTGGATTTTGTGAAGGGGGAT  
TAAATCCATGAGGCTGATATAAATGCAGATAAAGATTGTGATGTGCTGGTGGTTATAAAGCTGTGTATCGGATCAGCTTTGCCATGGCCATCTTTTTCTTGTCTTTCTCTG  
CTCATGTTGAAAGTAAAACAAGTAAAGATCCCGAGCAGCAGTACATAAATGGTTTTGGTCTTCAAATTTGCTGCCCTATTGGAATCATGGTTGGATCTTTCTACATCCCT  
GGGGGCTATTTAGCTCAGTCTGGTTTGTGGTATGAGTGGAGCCGCCCTTTCATCCTCATTACAGCTGGTGTGTTGGTAGACTTTGCTCATTCTTGAATGAATCAT---

CGCTTTACTGTCTTCAACAAGCGCCTTTTATATCCTGTCAATCATCTGTGTGGGCTGCTATACATACTACACAAAACAGATGGCTGCACAGAAAACAAGTTCTTCATCAG  
TATTAACCTGATCCTTTGCGTTGTGGCTTCTGTTATATCGATCCACCAAAAATTCAGGAACACAGCCTCGCTCGGCCCTTGCAGTCTCTCTCATCACCCCTACACTAT  
GTACCTCACCTGGTCAGCCATGTCGAATGAACTGATGCTTCTGCACCCGCACTGATGAGCTTTTACACCGCATAACTGCACCAACAGCCCTGCTCGGAAATTCAGCTG  
CTGTGGTCCCTACCCTCCACTTCAAAGAGTGGGCTTTACTGGATTCAGATAATTTTGAAGTGTGTTTTGCTTTGTTCTCGCCATTTGCTATTCTAGCATCCGCACTTC  
CACTAATAGCCAAGTAGACAAGCTGACCTGTGACGGGAGTGACAGCCTCATCTTTGGTGTATCAACTACCAATGTTGGTCCAGTGATGAAGAATTTGACAGCCTCGACGGCT  
TTGGACAACGAGATGGCTGCACAGAAAACAAGTTCTTCATCAGTATTAACCTGATCCTTTGCGTTTGTGTTTCTATTATCAATCCACCAAAAATTCAGGAACACAGCCTC  
AAAGTTTCAGAGCATGACCAGCAAGTGGCCAGCTGTGTGGTCAAGATCAGCTTCAGCTGGGTCTGCCCTGCTTTACGCTGTGACCCCTTGTGGCTCCACTTGTCTCACC  
GTGTCGGACTTCAGCTGA

>saiBoli

ATGGGGGGCTGTGCTGGGTGTCTTCTCCCTCGCCAGCTGGGTCCATGCCTCTGCAGCGGTGCCTCATGTTTGTGTGTAGTTGTCTAACAGTAAGAATTCACGTTGAC  
CTCGCCTCATTATGCTTTACTTCTCTCTGAGCAGCTGCGCTATCCTATCATGCAGAGAAAAGAGATGAAACAGTACCTGAAAGAGATTCTGGATTTTGTGAAGGGGGAT  
TTAAATCCATGAGGCTGATAGAATGCAGATAAAGACTGTGATGTGCTGGTGGTTATAAAGCTGTGTATCGGATCAACTTTGCCATGGCCATCTTTTTCTTGTCTTTCTCT  
GCTTATGATAAAAGTAAAACAAGTAAAGATCCCGAGCAGCAGTACACAATGGGTTTTGGTTCTTCAAATTTGCTGCCCTATTGGAATCATGGTTGGCTTTTCTACATCCC  
TGGGGGCTATTTAGCTCAGCTCGCTGGTTTTTGTGGTATGAGGAGGGGCCCTTTCATCCTTTATTAGCTGGTGTGTGGTAGACTTTGCTCATTCTTGAATGAATCAT  
GGGTAATCGAATGGAAGAAGGAAACCCAAAGGTTGTGGTATGCCGCTTTACTGTCTTTCACAAGCGCCTTTTATATCCTGTCCATCATCTGTGTGGGCTCCTATACATGAC  
TACACCAAAACAGATGGCTGCACAGAAAACAAGTTCTTCATCAGTATTAACCTGATCCTTTGCGTTTGTGTTTCTATTATCAATCCACCAAAAATTCAGGAACACAGCCTC  
CGCTGTGGCCTTTCAGTCTCCATCATCACCCCTACACTATGTACCTCACCTGGTCCAGCAGTGTCCAATGAACTGATCGTTCTGCAACCCAGCCTGATGAGCTTTAT  
TACACGCATAACTGCACCAACCCCTGGCTCCTGGCAATTCAGTCTGTGATCCCTACCCTATTCCACCATCAAAGAGTGGGTCTTTACTGGATTCAGATAATGTTATGGGCT  
GTTTGTCTTTGTTGCTGGTATATTCTAGCATCCGCACTTCCAGTAATAGCCAAAGTAGACAAGCTGCAACTCATCTGTGTCGGGAGTGACAGTGTGATCCTTTGGTGTACAACACTAC  
CAGTGGTGCCAATGATGAAGAAGATGGACAGCCTCGGGGGCTGTGGACAATGAGAAGAGGGAGTGCAATAGCTACTCCTTTATCCACCTCATGCTCCTCGCTGGCTTCC  
TTGATCATGATGACCCCTGAGCTGTGCTGTTACAGCCCTGATGCAAAAGTTTCAGAGCATGACCAGCAAGTGGCCAGCTGTGTGGTCAAGATCAGCTCCAGCTGGGTCTGTC  
TCCTGCTTACGCTGTGACCCCTTGTGGCTCCACTTGTCTCACCAGTCCGGACTTTCAGCTGA

>papAnu2

ATGGGGGGCTGTGCTGGGTGTCTTCTCCCTCGCCAGCTGGGTCCATGCCTCTGCAGCGGTGCCTCATGTTTGTGTGTAGTTGTCTAACAGTAAGAATTCACGTTGAC  
CTCGCCTCATTATGCTTTACTTCTCTCTGAGCAGCTGTTGTATCCTATATCATGCAGAGAAAAGAGATGAAACAGTACCTGAAAGAGATTCTGGATTTTGTGAAGGGGGAT  
ATCCATGAGGCTGATATAAATGCAGATAAAGATTGTGATGTGCTGGTGGTTATAAAGCTGTGTATCGGATCAGCTTTGCAATGGCCATTCAGCTTTGCAATGGCCATTCGCTGCT  
AAACAAGTAAAGATCCCGAGCAGCAGTACACAATGGTTTTGGTCTTCAAATTTGCTGCCCTATTGGAATCATGGTTGGATCTTTCTACATCCTCGGGGCTATTTAGCTC  
AGTCTGGTTTGTGCTGGCATGATAGGGGGCCGCCCTTTCATCCTCATCAGCTGGTGTGTTGGTAGACTTTGCTCATTCTTGAATGAATCATGGGAAATCGAATGGAAG  
AAGGAAACCCAAAGTTGTTGGTATGCGGTTACTGTCTTTCAACAGCCCTTTTATCCTGTGCAACTCATCTGTGTCGGGCTGCTCCTACATACTACACCAACAGCAGTGGCT  
GCACAGAAAACAAGTTCTTCATCAGTATTAACCTGATCCTTTGCGTTGTTGGCTTATTATATCAACTACCCCAAAAATTCAGGAACACAGCCTCGCTCGGCCCTTTCAGCT  
CCTCCTCATCAGCTCAGCTGTGCTGACCCCTGAGTGGTCCAGCCTATGCAAAAGTTTCAGAGCATGACCAGCAAGTGGCCAGCTGTGTGGTCAAGATCAGCTCCAGCTGGGTCTGCC  
CACTGGCTCCTGGAATTCAGTCTGTGGTCCCTACCCTACTCCACTATCAAAGAGTGGGTCTTTACTGGATTAGATAATTTATGGactctttgtctttctctgCCTTTTGTATTCT  
TAGCATCCGCACTTCCACTTAAGCCAAAGTAGACAAGCTGACCCCTGTGAGGGAGTGACAGCGTATCCTTTGGTGTACAACCTACCAATGGTGGCAGTGTGAAGAAGATTGGA  
CAGCCTCGACGGGCTGTGGACAACGAGAAGAGGGAGTGCAATAGCTACTCCTTTATCCACCTCATGCTCCTCGCTGGCTTCCCTGTGATCATCATGATGACCCCTGACCAAGCT  
GGTACAGCCCTGATGCAAAAGTTTCAGAGCATGACCAGCAAGTGGCCAGCTGTGTGGTCAAGATCAGCTCCAGCTGGGTCTGCCCTCCTGCTTTACGCTGTGACCCCTTGTGG  
CTCCACTTGTCTCACCAGTCCGGACTTCAGCTGA

>hg38

ATGGGGGGCTGTGCTGGGTGTCTTCTCCCTCGCCAGCTGGGTCCATGCCTCTGCAGCGGTGCCTCATGTTTGTGTGTAGTTGTCTAACAGTAAGAATTCACGTTGAC  
CTCGCCTCATTATGCTTTACTTCTCTCTGAGCAGCTGTCGATCCTATATCATGCAGAGAAAAGAGATGAAACAGTACCTGAAAGAGATTCTGGATTTTGTGAAGGGGGAT  
TTAAATCCATGAGGCTGATATAAATGCAGATAAAGATTGTGATGTGCTGGTGGTTATAAAGCTGTGTATCGGATCAGCTTTGCCATGGCCATCTTTTTCTTTTCTCTCT  
GCTCATGTTCAAAGTAAAACAAGTAAAGATCCCGAGCAGCAGTACACAATGGTTTTGGTCTTCAAATTTGCTGCCCTATTGGAATCATGGTTGGATCTTTCTACATCCC  
TGGGGGCTATTTAGCTCAGTCTGGTTTGTGTGGTATGATAGGGGGCCGCCCTTTCATCCTCATTAGCTGGTGTGCTGTGGTAGACTTTGCTCATTCTTGAATGAATCAT  
GGGTAATCGAATGGAAGAAGGAAACCCAAAGGTTGTGGTATGCTGCTTTACTGTCTTTCACAAGCGCCTTTTATATCCTGTCAATCATCTGTGTGGGCTGCTCCTATACATACT  
ACACCAAAACAGATGGCTGCACAGAAAACAAGTTCTTCATCAGTATTAACCTGATCCTTTGCGTGTGGCTTCTATTATATCGATCCACCAAAAATTCAGGAACACAGCCTC  
GCTCCGGCCTTTGCACTCCTCCCTCATCACCCCTACACTATGTACCTCACCTGGTACGCCATGTCAAATGAACTGATCGTTCTGCAATCCCACTGATGAGCTTTATTA  
CAGCATAAAGTGCACCAAGTGGCTCGGAAATTCAGTCTGTGGTCCCTACCCTACTCCACTATCAAAGAGTGGGTCTTTACTGGATTAGATAATTTATGGactctttgtctttctgCCTTTTGTATTCT  
TTGCTTTTGTCTCGCCTTTGATTCTAGCATCCGCACTTCCACTAATAGCCAAGTAGACAAGCTGACCCCTGTGAGGGAGTGACAGCGTATCCTTTGGTGTACAACCTACCA  
GTGGTGGCAGTGTGAAGAAGATGGACAGCCTCGGGGGCTGTGGACAACGAGAAGAGGGAGTGCAATAGCTACTCCTTTATCCACCTCATGCTCCTGGCTTCCCTGTGATCATCATGATGACCCCTGACCAAGCT  
GTACATCATGATGACCCCTGACCAGCTGGTACAGCCCTGATGCAAAAGTTTCAGAGCATGACCAGCAAGTGGCCAGCTGTGTGGTCAAGATCAGCTCCAGCTGGGTCTGCCCTCCTGCTTTACGCTGTGACCCCTTGTGG  
CCTGCTTTACGCTGTGACCCCTTGTGGCTCCACTTGTCTCACCAGTCCGGACTTCAGCTGA

>macFas5

ATGGGGGGCTGTGCTGGGTGTCTTCTCCCTCGCCAGCTGGGTCCATGCCTCTGCAGCGGTGCCTCATGTTTGTGTGTAGTTGTCTAACAGTAAGAATTCACGTTGAC  
CTCGCCTCATTATGCTTTACTTCTCTCTGAGCAGCTGTTGTATCCTATATCATGCAGAGAAAAGAGATGAAACAGTACCTGAAAGAGATTCTGGATTTTGTGAAGGGGGAT  
TTAAATCCATGAGGCTGATATAAATGCAGATAAAGATTGTGATGTGCTGGTGGTTATAAAGCTGTGTATCGGATCAGCTTTGCCATGGCCATCTTTTTCTTTTCTCTCT  
GCTCATGTTGAAAGTAAAACAAGTAAAGATCCCGAGCAGCAGTACACAATGGTTTTGGTCTTCAAATTTGCTGCCCTATTGGAATCATGGTTGGATCTTTCTACATCCC  
TGGGGGCTATTTAGCTCAGTCTGGTTTGTGTGGTATGATAGGGGGCCGCCCTTTCATCCTCATTAGCTGGTGTGCTGTGGTAGACTTTGCTCATTCTTGAATGAATCAT  
GGGTAATCGAATGGAAGAAGGAAACCCAAAGGTTGTGGTATGCTGCTTTACTGTCTTTCACAAGCGCCTTTTATATCCTGTCAATCATCTGTGTGGGCTGCTCCTATACATACT  
ACACCAAAACAGATGGCTGCACAGAAAACAAGTTCTTCATCAGTATTAACCTGATCCTTTGCGTGTGGCTTCTATTATATCGATCCACCAAAAATTCAGGAACACAGCCTC  
GCTCCGGCCTTTGCACTCCTCCCTCATCACCCCTACACTATGTACCTCACCTGGTACGCCATGTCAAATGAACTGATCGTTCTGCAATCCCACTGATGAGCTTTATTA  
CAGCATAAAGTGCACCAAGTGGCTCGGAAATTCAGTCTGTGGTCCCTACCCTACTCCACTATCAAAGAGTGGGTCTTTACTGGATTAGATAATTTATGGactctttgtctttctgCCTTTTGTATTCT  
TTGCTTTTGTCTCGCCTTTGATTCTAGCATCCGCACTTCCACTAATAGCCAAGTAGACAAGCTGACCCCTGTGAGGGAGTGACAGCGTATCCTTTGGTGTACAACCTACCA  
GTGGTGGCAGTGTGAAGAAGATGGACAGCCTCGGGGGCTGTGGACAACGAGAAGAGGGAGTGCAATAGCTACTCCTTTATCCACCTCATGCTCCTGGCTTCCCTGTGATCATCATGATGACCCCTGACCAAGCT  
GTACATCATGATGACCCCTGACCAGCTGGTACAGCCCTGATGCAAAAGTTTCAGAGCATGACCAGCAAGTGGCCAGCTGTGTGGTCAAGATCAGCTCCAGCTGGGTCTGCCCTCCTGCTTTACGCTGTGACCCCTTGTGG  
CCTGCTTTACGCTGTGACCCCTTGTGGCTCCACTTGTCTCACCAGTCCGGACTTCAGCTGA

TGTACATCATGATGACCCGTACCAGCTGGTACAGCCCTGATGCAAAAGTTTCAGAGCATGACCAGCAAGTGCCAGCTGTGTGGGTCAAGATCAGCTCCAGCTGGGTCTGCCT  
CCTGCTTTACGTCTGGACCCTTTGGCTCCACTGTCTCACCAGTCGGGACTTCAGCTGA  
>nomLeu3

GTTCATGCCTCTGCAGCGGTCCTCATGTTTGTGTAGTTGCTGTCTAACAGTAAGAAGTCCACGGTACTCGCCTCATTTATGCTTTCTCTCCTGAGCACTGTC  
GTATCATATGTCATGCAGAGAAAAGAGATGGAAATCTACCTGAAGAAGATCTCTGCTTTTGTGAAGGGGGATTTAAAATCCATGAGGCTGATATAAATGCAGATAAAGATTGA  
GATGTGCTGGTTGGTTATAAAGCTTATCGGATCAGCTTTGCCATGGCCATTTTTCTTTCTCTGCTCATGTTCAAAGTAAAAACAAGTAAAGATCCCCGTTGCA  
GCAGTACACAATGGGTTTTGGTTCTTCAAATTTGCTGCCCTTATGGAATCATGGTTGGATCTTTCTACATCCCTGGGGCTATTTTCAGCTCAGTCTGGTTTGTGTTGGCATG  
ATAGGGGGCCGCCCTTTCATCCCTATTGAGCTGGTGTCTGGTAGACTTTGCTCATTCTTGGAAATGAATCATGGGTAATCGAATGGAAGAAAGGAAACCCAAAGTTGTGGTA  
TGCTGCTTTACTGTCTTTACAAGCGCTTTTATATCCTGTCAATCATCTGTGTTGGGCTGCTCATACATACTACACCAACCAAGATGGCTGCACAGAAAACAAGTTCTTCATC  
AGTATTAACTGATCCTTTGCGTTGTGGCTTCTATTATCGATCCACCAAAAATTCAGGAACACCCAGCTCGCTCCGGCTCTTGCACTCCTCCCTCATACCCTCTACACT  
ATGTACCTCACCTGGTCAAGCAATGCAATGAACCTGATCGTTCTGCAACCCCAACCTGATGAGCTTTATTACACGCATAAATGCACCAACCCCTGGCTCCGAAATTCAC  
TGCTGTGGTCCCTACCCCTACTCCACCGTCAAAGAGTGGGCTTTACTGGATTGAGATAAATTTATTGGACTGTTGTCTTTGTTCTCTGCCTTTGATTTCGAGCATCCGACT  
TCCACTAATAGCCAAGTAGACAAGCTGACCCCTATCAGGGAGTGACAGCGTCACTCTTGGTGTACCACTACCAATGGTGCCAGTGATGAAGAAGATGGACAGCTCCGCGGG  
CTGTGGACCAACGAGAAGAGGGAGTACAGTATAGCTACTCCTTTTCCATCTCAGCTTGTGACTTCCCTTTGACATCATGATGACCCCTGACAGCTGGTGAAGACAGCTG  
GCAAAAGTTTCAGAGCATGACCAGCAAGTGCCAGCTGTGTGGGTCAAGATCAGCTCCAGCTGGGTCTGCCTCTGCTTTACGTCTGGACCCTTTGGCTCCACTGTCTCA  
CCAGTCGGGACTTCAGCTGA

>ponAbe2  
ATGGGGGGTGTCTGGGTGTCTTCTCCCTCGCCAGCTGGGTCCATGCCTCTGCAGCGGTGCCTCATGTTTGTGTAGTTGCTGTCTAACAGTAAGAATCCACGGTGA  
CTCGCCCTATTGCTTTTCTTCTCCTCCTGAGCACTGCTGATCCTATATCATGCAGAGAAAAGAGATGGAAACTTACTTTGAAGAAGATTCCTGGATTTTGTGAAGGGGGAT  
TTAAAATCCATGAGGCTGATATAAATGCAGATAAAGATTGTGATGTGCTGGTTGGTATAAAGCTGTGATCGGATCAGCTTTGCCATGGCCATCTTTTTCTTTGCTTTTCTCT  
GCTCATGTTCAAAGTAAAAACAAGTAAAGATCCCGAGCAGCAGTACACAATGGGTTTTGGTTCTTCAAATTTGCTGCTTATTGAATCATGTTGGATCTTTCTACATCC  
TGGGGCTATTTTCAGCTCAGTCTGGTTTGTGTTGGCATGATAGGGGGCCGCCCTTTCATCCTCATTGAGCTGGTGTCTGGTAGATTTGCTCATTCTTGAATGAATCAT  
GGGTAATCGAATGGAAGAAGGAAACCCAAAGTTGTGGTATGCTGCTTTACTGTCTTTACAAGCGCTTTTATATCCTGTCAATCATCTGTGTCCGGCTGCTCTATACATACT  
ACACCAACCCAGATGGCTGCACAGAAAACAAGTTCTTATCAGTATTAACCTGATCCCTTGGCTTGTGGCTTTATTATATCGATCCACCAAAAATTCAGGAACACCCAGCTC  
GCTCCGGCCCTTTCGAATCCTCCGCTCATACCCTCTACACTATGACCTCACCTGATCCGATGCTTCCCAATGAACCTGATCGTTCTGCAATCCCAACCTGATGAGCTTTATTA  
CAGCATAAAGTCAACCAAGCTGGCTTGGAAATTCACCTGCTGGTGTCCCTACCCTCACCCTCAAAAGTGGGCTTTTACTGGATTTCAGATAAATTTATTGGACTG  
TTTGTCTTTGTTCTCTGCCTTTTGTATTCTAGCATCCGACTTCCACTAATAGCCAAGTAGACAAGCTGACCCCTGTCCAGGGAGTGACAGCGTCACTCTGGCGATAACAATACC  
AGTGGTGCCAGTGATGAAGAAGATGGACAGCTCCGCGGGCTGTGGACAACGAGAAGAGGGAGTGCAGTATAGCTACTCCTTATTCACCTCATGCTCTGCTTGGCTTCCCT  
TGACATCATGATGACCCGTACCAGCTGGTACAGCCCTGATGCAAAAGTTTCAGAGCATGACCAGCAAGTGCCAGCTGTGTGGGTCAAGATCAGCTCCAGCTGGGCTGGCTGCCT  
CCTGCTTTACGTCTGGACCCTTTGGCTCCACTGTCTCACCAGTCGGGACTTCAGCTGA

>rhoMac3  
ATGGGGGGTGTCTGGGTGTCTTCTCCCTCGCCAGCTGGGTCCATGCCTCTGCAGCGGTGCCTCATGTTTGTGTAGTTGCTGTCTAACAGTAAGAATCCACGGTGA  
CTCGCCCTATTGCTTTTCTTCTCCTCCTGAGCACTGTTGATCCTATATCATGCAGAGAAAAGAGATGGAAACTTACTTTGAAGAAGATTCCTGGATTTTGTGAAGGGGGAT  
TTAAAATCCATGAGGCTGATATAAATGCAGATAAAGATTGTGATGTGCTGGTTGGTATAAAGCTGTGATCGGATCAGCTTTGCCATGGCCATCTTTTTCTTTGCTTTTCTCT  
GCTCATGTTCAAAGTAAAAACAAGTAAAGATCCCGAGCAGCAGTACACAATGGGTTTTGGTTCTTCAAATTTGCTGCTTATTGAATCATGTTGGATCTTTCTACATCC  
TGGGGCTATTTTCAGCTCAGTCTGGTTTGTGTTGGCATGATAGGGGGCCGCCCTTTCATCCTCATTGAGCTGGTGTCTGGTAGATTTGCTCATTCTTGAATGAATCAT  
GGGTAATCGAATGGAAGAAGGAAACCCAAAGTTGTGGTATGCGCTTTACTGTCTTTACAAGCGCTTTTATATCCTGTCAATCATCTGTGTCCGGCTGCTCTATACATACT  
ACACCAACCCAGATGGCTGCACAGAAAACAAGTTCTTATCAGTATTAACCTGATCCCTTGGCTTGTGGCTTTATTATATCGATCCACCAAAAATTCAGGAACACCCAGCTC  
GCTCCGGCCCTTTGAGTCTCCCTCATACCCTCTACACTATGACCTCACCTGATCCGATGCTTCCCAATGAACCTGATCGTTCTGCAATCCCAACCTGATGAGCTTTATT  
ACACGATAAAGTCAACCAAGCTGGCTTGGAAATTCACCTGCTGGTGTCCCTACCCTACTCCACTCAAAAGATGGGCTTTTACTGGATTTCAGATAAATTTATTGGACTG  
TTTGTCTTTGTTCTCTGCCTTTTGTATTCTAGCATCCGACTTCCACTAATAGCCAAGTAGACAAGCTGACCCCTGTCCAGGGAGTGACAGCGTCACTCTGGCGATAACAATACC  
AATGGTGCCAGTGATGAAGAAGATGGACAGCTCCGCGGGCTGTGGACAACGAGAAGAGGGAGTGCAGTATAGCTACTCCTTATTCACCTCATGCTCTGCTTGGCTTCCCT  
TGACATCATGATGACCCGTACCAGCTGGTACAGCCCTGATGCAAAAGTTTCAGAGCATGACCAGCAAGTGCCAGCTGTGTGGGTCAAGATCAGCTCCAGCTGGGCTGGCTGCCT  
CCTGCTTTACGTCTGGACCCTTTGGCTCCACTGTCTCACCAGTCGGGACTTCAGCTGA

SERINC5-iso1  
>panPan1  
ATGTGAGCTCAGTGTGTGCGGGCCAGCTGGCCTGCTGCTGTGGGTCTGCAGGCTGCTCTCTCTGTGTGATTGCTGCCCCAGGATTCGGCAGTCCCTCAGCACCCTGCTC  
ATGTACGGCCTCTACTTCTTCTGTTGCTGCTGCTCTGCTGCATCATGATGCAACAACCCGTGGCTCACAAGATGAAAGAGCACATTCCTTTTTGAAAGATATGTTAAAGGCATTA  
AAGCTGGTGCACACCTGTGAGAAGCTGGTGGGATATTTGCCGTGATAGAGCTGTGTTTGAATGCTGTTTCTTTTAACTTCTGCTGCTTTCATTCAGATCAGGCACTTTCTT  
GTAGAGCTATTACAAATGGCTTTTGGTTCTTTAACTTCTGCTGCTGTTGGGGCCCTTTCATCAGTGGGACTTTCTTCAATTCAGATCAGGCACTTTCTTCAAGCTGGCGCT  
ATGTGGGAGCCGTGGAGGCTTCTCTTCAATTGGCATCCAGCTCCTCCTGCTGCTGGAGTTTGACATAAAGTGAACAAGAAGTGGACAGCAGGCACAGCCAGTAAACAGCT  
GTGGTACGCTCCTTGGCCCTGGTGACGCTCCTCATGATATCCATTGCCACTGGAGGCTGGTTTGTATGGCAGTGTTTTATACACAGAAAAGACGGCTGCATGGAACAAACAA  
ATTTCTGCTGGGAGTAAATGGAGCCTATGCCGCTTATTTCTATTGGCCATTCACCCCTGACCCCTGCAAGCACTTCCAAATCGACAGCCACCTCGGGGCTTTACAATCAGGGGTCA  
GTGCTATGTCACCTACCTCCTTCTCAGCTCTGTCCAGCAAACCTGCGAGAAGTATGTTCTAGATGAACATGGGAAAATGTTACAATCTGTGTGCCTGACTTTGGTCAAGACT  
TTCAGAGATGAAAACCTGTTGACTTGTGGGACCCCTTAACTGGGACTATCTTCAATCGGATGATCTTGTGTTGACATCAACAACAAGATCAAGTGTGACGCTTGCACGCTTGCAGG  
GATACGAGCTCCTGAATGGAAATAGCTCGCTGTTGTTTTGCTTCACTGCTGGTGGAGAGGACTGAAGAGCAGCAGCCGGGGAAGGAGGGACCAGGGTCAATTTATG  
ACGAGAAGAAAAGGCACCTGATCTACTCCTACTTCCACTTCTGTTCTTCTAGCTTCCGTTATGTGATGATGACCCGTACCAACTGGTTCAACTACGAAAGTGCCAA  
ATCGAGAGCTTCTCAGCGGGAGCTGGTCCATCTTCTGGGTCAAGATGGCCCTCCTGCTGGATATGCGTGTGATGCTGTACCTGTGACCTGGTCCCTCCTGCTGCCCA  
CCCGGAGTTCTCTGTGTGA

>rhoRox1  
ATGTGAGCTCAGTGTGTGCGGGCCAGCTGGCCTGCTGCTGTGGATCTGCAGGGTCTCTCTCTGTGTGATTGCTGCCCCAGGATTCGGCAGTCCCTCAGCACCCTGCTC  
ATGTATGCCCTCTACTTCTTCTGTTGCTGCTGCTGCTGCATCATGATGCAACAACCTGTGGCTCACAAGATGAAAGAGCACATTCCTTTTTTGAAGATATGTTAAAGGC  
ATTAAGCTGGTGACACCTGTGAGAAGCTGGTGGGATATTTGCCGTGATAGAGCTGTGTTTGAATGGCTTGTCTTTCTTTTCTTCTGCTACTGACCTTGAACATCAAC  
AACAGCAAAAGTTGTAGAGCTCATATTCACAATGGCTTTTGGTTCTTTAACTTCTGCTGTTGGGAGCCATGTGCTCAGGAGCTTTCTTCAATTCAGATCAGGACACCTTTCTG  
AACGCTGGCGCTATGTGGGAGCCGTGGAGGCTTCCCTTCTATAGCATCCAGCTCCTCCTGCTGCTGGAGTTTGACATAAAGTGAACAAGAAGTGGACAGCAGGCAC  
GCCAGTAAACAGCTGTGGTACGCTCCTTGGCCCTGGTGACACTCATGATTTCCATTGCCACTGGAGGCTGGTTTTGATGGCAGTGTTTTACACACAGAAAAGACGGCT  
GCATGGAAAACAAAATCTGCTGGGAGTAAATGGAGGCTATGCTGCTTATTTCATTGGTAGCCATCTCGCCCTGTGTCCAAAATCGACAGCCGACTCAGGGCTCCTACAA  
TCAGGGGTCAATAAGCTGCTATGTCACCTACCTCACCTTCTCAGCTGTGCCAGCAACCTGCAAGAAGTATGATGAACATGGGAAAATGTTACAATCTGTGTGCTGCTGA  
CTTTGGTCAAGACCTGTACAGAGATGAAAACCTTGGTACTATACTGGGAGCCCTTAACTCGATGTATCTTATATTCAATGTTGACATCAACAACAAGATCGAGTTCGGA  
CGCTCTGACAGGGGATATGACGCTCTGAACCTGAAATAGCCGCTGTTTCTTCTGCTGCTGTTGGTGGAGGACACTGAAGAGGACACTGAAGAGCAGCAGGGGAAAGGAGGACC  
ACGGGTCAATTTATGATGAGAAGAAAAGGCACCTGATCATCTACTTCCACTTTGTGTTCTTCTGGCTTCCCTGTATGTGATGATGACCCGTACCAACTGGTTCAACTA  
CGAAAGTGCCAACTCGAGAGCTTCTCAGCGGGAGCTGGTCCATCTTCTGGGTCAAGATGGCCCTCCTGCTGGATAAGCTGTGTTGATGCTGTGATGCTGCTGCTGCTGCT  
CTCTGCTGCCCAACCCGGAGTTCTCTGTGTGA

>rhoGor3  
ATGTGAGCTCAGTGTGTGCGGGCCAG-----  
ATTCCTTTTTTGAAGATATGTTAAAGGCATTAAAGCTGGTGCACCTGTGAGAAGCTGGTGGGATATTTGCCGTGATAGAGTCTGTTTTGAAATGGCTTGTCTTCTTTTA  
TCTCTGTCTACTGACCTGAAAATCAACAACAGCAAAAGTTGTAGAGCTCATATTCACAATGGCTTTTGGTTCTTTAACTTCTGCTGTTGGGGGCCATGTGCTCAGGAGCTT  
TCTTCTTCCAGATCAGGACACCTTTCTGAACGCTTGGCCCTATGTGGAGCCGCTGGAGGCTTCTCCTTCAATGGCATCCAGCTCCTCCTGCTGGGATTTGCACATAA  
GTGGAATAAAGACTGGACAGAGCCAGCCAGTAAACAAGCTGTGGTACGCTCCTGCTGCTGGGAGCCATGTGCTCAGGAGCTTTCTTCAATTCAGATCAGGACACCTTTCTG  
GCAATGTTTTATACGCAAGAGCCGCTGCAATGGAAAACAATTTCTGCTGGTAAATGAGGAGTAAATGGAGCCCTATGCTGCTTATTCTTTGTTGGTGGTGGTGGTGGT  
TCGACAGCCACTCGGGCTTACAATCAGGGGTATAAGCTGCTATGTCACCTACCTCACCTTCTCAGCTCTGTCCAGCAAACTGCAGAAGTATGTTCTAGATGAACATG  
GGAAAATGTTACAATCTGTGTGCTGACTTTGGTCAAGACCTGTACAGAGATGAAAACCTGGTGAATACTGGGGACCCGCTTAACTCGGATGTATCTTGTATGATGTT  
TGACATCAACAACAAGATCGAGTTCTGACGCTCTCAGGGGCGATACGCACTGCTGAAATTTGAAATAGCTCGCTGTTGTTTTGCTTCACTGGTGGGAGGACAGAGA  
AGAGCAGCAGCCGGGAAAGGAGGACCCAGGGTCAATTTAGCAGAGAAAAGGCAACCCCTGATCATCTACTCCTACTTCCACTTCTGTTCTTCTAGCTTCCCTGTATGTG  
ATGATGACTGTCAACCTGTTCAACTACGAAAGTCCAACTCGAAGCTGCAGAGCTTCTCAGCGGGAGCTGGTCCATCTTCTGGGTCAAGATGGCCCTCCTGCTGGATAAGCTGTG  
TGTGATGCTGTGACCTGGTGCCTCCCTCTGCTGCCCAACCCGGGAGTTCTCTGTGTGA

>panTro4

ATGTCAGCTCAGTGTGTCGGGGCCAGCTGGCCTGCTGCTGTGGGTCTGCAGGCTGCTCTCTCTGCTGTGATTGCTGCCCCAGGATTGGCAGTCCCTCAGCACCCGCTTC  
ATGTACGCCCTACTTCACTTCTGGTGGTGGTCTCTGCTGCATCATGATGTCACAACCCGCTGGCTCACAAGATGAAAGAGCACATTCCCTTTTTTGAAGATATGTGTAAGGGC  
ATTAAGCTGGTGACACCTGTGAGAAGCTGGTGGGATATTCTGCCGTATAGAGTCTGTTTTGGAATGGCTGTTCTTCTTTATCTCTGCTACTGACCTTGAANAATCAAC  
AACAGCAAAAGTTGTAGAGCTCATATTCACAATGGCTTTTGGTTCTTTAAACTTCTGCTGTTGGGGGCCATGTGCTCAGGAGCTTCTCATTCCAGATCAGGACACCTTTCTG  
AACGCCCTGGCGCTATGTGGGAGCCGTCGGAGGCTTCCCTCTTCAATGGCATCCAGCTCCTCCTGCTCCTGGAGTTTGCACATAAGTGGAAACAAGAACTGGACAGCAGGCCACA  
GCCAGTAAACAAGCTGTGTACGCTTCCCTGGCCCTGGTGACACTCATGATGATTTCCATTGCCACTGGAGGCTTGGTTTTGATGGCAGTGTTTATACACAGAAAGACGGCTG  
CATGGAAAACAATAATCTGCTGGGAGTAAATGGAGCCCTATGCTGCTATATTTCTGGTAGCCACTCACCCTGGGTCCAAAATCGACAGCCACACTCGGGCTCTTACAAT  
CAGGGGTCAAAAGCTGTATGTCACCTACCTCACCTTCTCAGCTCTGTCCAGCAAACCTGCAGAAGTAGTTCTAGATGAACATGGGAAAAATGTTACAATCTGTGTGCTGAC  
TTTGGTCAAGACCTGTACAGAGATGAAAACCTGGTGAATACTGGGGACCAGCCTCTTAATCGGATGATCTTGTATTTCATGTTTGCATCAACAACAAGATCAAGTTCTGAC  
GCTTGCAGGGGGGATACGACAGCTCCTGAATTTGAAAATAGCTCGCTGTTGTTTTTCTGTCAGCTGGTGGAGAGGACACTGAAGAGCAGCAGCCGGGGAAGGAGGGACCA  
CGGGTCAATTTATGACGAGAAGAAAGGCCACCTCTACATCTACTCCTACTTCCACTTCTGTTCTTCTAGCTCCCTGTATGTGATGATGACCGTCAACAACCTGGTTCAACTAC  
GAAAGTGCCAACATCGAGAGCTTCTTACGCGGGAGCTGGTCCATCTTCTGGTCAAGATGGCCTCCTGCTGGATATGCGTGTGTTGACCTGTGTACGCTGGTGCCTCCC  
TCTGCTGCCCCACCCGGAGTCTCTGTGTGA

>calJac3

ATGTCCGCTCAGTGTGTCGGGGCCAGCTGGCCTGCTGCTGTGGGTCTGCAGGCTGCTCTCTCTGCTGTGATTGCTGCCCCAGGATTGGCAGTCCCTCAGCACCCGCTTC  
ATGTACGCCCTACTTCACTTCTGGTGGTGGCCTCTGCTGCATCATGATGTCACAACCTGTAGCTCACAAGATGAAAGAGCACATTCCCTTTTTTGAAGAAATGTGTAAGGGC  
ATTAAGCTGGTGACACCTGTGAGAAGCTGGTGGGATATTCTGCCGTATAGAGTCTGTTTTGGAATGGCTGTTCTTCTTTATCTCTGCTACTGACCTTGAANAATCAACA  
ACAGCAAAAGTTGTAGAGCTCATATTCACAATGGCTTTTGGTTCTTTAAACTTCTGCTGTTGGGGGCCATGTGCTCAGGAGCTTCTTCACTCCAGATCAGGACACCTTTCTGA  
ACGCTGGCGCTACGTGGGAGCCATCGGAGGCTTCCCTTTTATCGGCATCCAGCTCCTCTGCTGTTGGAAATTTGCACATAAGTGGAAACAAGAACTGGACAGCAGGCCACGG  
CCAGTAAACAAGCTGTGATGGAGCCCTGGTGGAGCCATCATGATTTTCTGCTCCTGCTGTTGGAAATTTGCACATAAGTGGAAACAAGAACTGGACAGCAGGCCACGG  
ATGGAAAACAATAATCTGCTGGGAGCTGAATGGAGGCCCTGTGCTGCTTATTTCATTTGGTAGCCACTCGCCCAAGTCCAAAATCGACAGCCACACTCGGGCTCCTACAGT  
CTGGGTCAAAAGCTGTATGTCACCTACCTCACCTTCTCAGCTCTGTCCAGCAAACCTGCAGAAGTAGTTCTAGATGAACATGGGAAAAATGTTACAATCTGTGTGCTGACT  
TTGGTCAAGACCTGTACAAGATGAAAACCTGGTGAATACTGGGGACCAGCCTCTTAATCGGATGATCTTGTATTTCATGTTTGCATCAACAACAAGATCGAGTCCGAC  
GCTTGCAGGGGGGATGACAGCTCCTGAGCTGAAAATAGCTCGCTGTTGTTTTTCTGCTCAGCTGGTGGAGAGGACACTGAAGAGCAGCAGCCGGGGAAGGAGGGGCCA  
CGGGTCAATTTACGACGAGAAGAAAGGCCACCTCTACATCTACTCCTACTTCCACTTCTGTTCTTCTGGCTTCTCTATGTGATGATGACCGTCAACAACCTGGTTCAACTAC  
GAAAGTGCCAACATCGAGAGCTTCTTACGCGGGAGCTGGTCCATCTTCTGGTCAAGATGGCCTCCTGCTGGATATGCGTGTGTTGACCTGTGTACGCTGGTGCCTCCC  
TCTGCTGCCCCACCCGGAGTCTCTGTGTGA

>nasLar1

ATGTCAGCTCAGTGTGTCAGGGCCAGCTGGCCTGCTGCTGTGGGTCTGCAGGCTGCTCTCTCTGCTGTGATTGCTGCCCCAGGATTGGCAGTCCCTCAGCACCCGCTTC  
ATTCCTTTTTTTGAAGATATGTTGAAGGCATTAAAGCTGGTGACACCTGTGAGAAGCTGGTGGGATATTCTGCCGTATAGAGTCTGTTTTGGAATGGCTGTTCTTCTTTCTTTA  
TCTTCTGCTACTGACCTGAAAATCAACAACAGCAAAAAGTTGTAGAGCTCATATTCACAATGGCTTTTGGTTCTTTAAACTTCTGCTGTTGGGAGCCATGTGCTCAGGAGCTT  
TCTTCACTTACGACACTCAGGACACTTTCTGAAACGCTGGCGCTATGTTGGAGCCCTCGGAGGCTTCTCTTCAAGGCATCCAGCTCCTGCTGGAGCTTGGACATAA  
GTGGAACAAGAAGTGGACAGCAGGCACAGCCAGTAAACAAGCTGGTACGCTCCTCGGCCCTGGTGACACTCATGATTTCCATTGCCACTGGAGGCTTGGTTTTGATG  
GCAGTGTTTTACACACAGAAAGAGCGGCTGCATGGAAAACAATAATCTGCTGGGAGTAAATGGAGGCCCTATGCCTGCTTATTTCTTGGTAGCCATCTCGCCCTGTGTCAAAA  
TCGACAGCCGCACTCAGGCTCCTACAATCAGGGGGTCAAAAGCTGATGTCACCTACCTCCTGTTGTTTTGCTTCTGCTGTTCCAGCTCCTGCTGTTCTTCTGCTTCAACTAC  
GGAAAATGTTACAATCTGTGTGCTGACTTTGGTCAAGACCTGTACAGAGATGAAAACCTGGTGAATACTGGGACCAGCCTCTTAATCGGATGATCTTATATTCATGTT  
TGACATCAACAACAAGATCGAGTCCGACGCTCTGCAGGGGGGATATGCAGCTCCTGAATTTGAAAATAGCCCGCTGTTGTTTTGCTTCACTGCTGGTGGAGAGG-----

CTACGAAAGTGCCAACATCGAGAGCTTCTTACGCGGGAGCTGGTCCATCTTCTGGTCAAGATGGCCTCCTGCTGGATATGCGTGTGTTGACCTGTGTACGCTGGTGCCT  
CCCTCTGCTGCCCCACCCGGAGTCTCTGTGTGA

>chlSab2

ATGTCAGCTCAGTGTGTCAGGGCCAGCTGGCCTGCTGCTGTGGGTCTGCAGGCTGCTCTCTCTGCTGTGATTGCTGCCCCAGGATTGGCAGTCCCTCAGCACCTCGCTTC  
ATGTACGCCCTACTTCACTTCTGGTGGTGGTCTCTGCTGCATCATGATGTCACAACCTGTGGCTCACAAGATGAAAGAGCACATTCCCTTTTTTGAAGATATGTGTAAGGGC  
ATTAAGCTGGTGACACCTGTGAGAAGCTGGTGGGATATTCTGCCGTATAGAGTCTGTTTTGGAATGGCTGTTCTTCTTTATCTCTGCTACTGACCTTGAANAATCAACA  
AACAGCAAAAGTTGTAGAGCTCATATTCACAATGGCTTTTGGTTCTTTAAACTTCTGCTGTTGGGGGCCATGTGCTCAGGAGCTTCTTCACTCCAGATCAGGACACCTTTCTG  
AACGCCCTGGCGCTATGTGGGAGCCGTCGGAGGCTTCCCTTTCATAGGCATCCAGCTCCTCCTGCTGTTGGAAATTTGCACATAAGTGGAAACAAGAACTGGACAGCAGGCCACA  
GCCAGTAAACAAGCTGTGGTAGCCCTCCTGGCCCTGGTGACACTCATGATTTCCATTGCCACTGGAGGCTTGGTTTTGATGGCAGTGTTTTACACACAGAAAGACGGCT  
GCATGGAAAACAATAATCTGCTGGGAGTAAATGGAGGCCCTATGCCTGCTTATTTCATTTGGTAGCCATCTCGCCCTGTGTCAAAATCGACAGCCGCACTCGGGGCTCCTACA  
ATCAGGGGGTCAAAAGCTGTATGTCACCTACCTCACCTTCTCAGCTCTGTCCAGCAAACCTGCAGAAGTAGTTCTAGATGAACATGGGAAAAATGTTACAATCTGTGTGCTGCT  
ACTTTGGTCAAGACCTGTACAGAGATGAAAACCTGGTGAATACTGGGGACCAGCCTCTTAATCGGATGATCTTATTTATTCATGTTTGCATCAACAACAAGATCGAGTCCG  
ACGCTCTGCAGGGGGCATATGACAGCTCCTGAATTTGAAAATAGCCCGCTGTTGTTTTGCTTCACTGCTGGTGGAGAGGACACTGAAGAGCAGCAGCCGGGGAAGGAGGGAC  
CAGGGTCAATTTACGACGAGAAGAAAGGCACCTGTCTACATCTACTCCTACTTCCACTTCTGTTTCTTCTGCTGTTCCAGTATGATGATGACCTGACCCACTGGTTCAACTAC  
ACGAAAAGTGCCAACATCGAGAGCTTCTTACGCGGGAGCTGGTCCATCTTCTGGTCAAGATGGCCTCCTGCTGGATATGCGTGTGTTGACCTGTGTACGCTGGTGCCTCC  
CCTCTGCTGCCCCACCCGGAGTCTCTGTGTGA

>salBol1

ATGTCCGCTCAGTGTGTCGGGGCCAGCTGGCCTGCTGCTGTGGGTCTGCAGGCTGCTCTCTCTGCTGTGATTGCTGCCCCAGGATTGGCAGTCCCTCAGCACCCGCTTC  
ATGTACGCCCTACTTCACTTCTGGTGGTGGTCTCTGCTGCATCATGATGTCACAACCTGTGGCTCACAAGATGAAAGAGCACATTCCCTTTTTTGAAGATATGTGTAAGGGC  
ATTAAGCTGGTGACACCTGTGAGAAGCTGGTGGGATATTCTGCCGTATAGAGTCTGTTTTGGAATGGCTGTTCTTCTTTATCTCTGCTACTGACCTTGAANAATCAACA  
ACAGCAAAAGTTGTAGAGCTCATATTCACAATGGATTTTGGTTCTTTAAACTTCTGCTGTTGGGGGCCATGTGCTCAGGAGCTTCTTCACTCCAGATCAGGACACCTTTCTG  
ACGCTGGCGCTATGTGGGAGCCGTCGGAGGCTTCCCTTTCATAGGCATCCAGCTCCTCCTGCTGTTGGAAATTTGCACATAAGTGGAAACAAGAACTGGACAGCAGGCCACGG  
CCAGTAAACAAGCTGTGGTAGCCCTCCTGGCCCTGGTGACGCTCATGATTTCCATTGCCACTGGAGGCTTGGTTTTGATGGCAGTGTTTTACACACAGAAAGACGGCTG  
CATGGAAAACAATAATCTGCTGGGAGTAAATGGAGGCCCTATGCCTGCTTATTTCATTTGGTAGCCACTCGCCCTGTGTCAGAATCGACAGCCACACTCGGGCTCCTACA  
TCAGGGGTCAAAAGCTGTATGTCACCTACCTCACCTTCTCAGCTCTGTCCAGCAAACCTGCAGAAGTAGTTCTAGATGAGCATGGGAAAAATGTTACAATCTGTGTGCTGCTAA  
CTTTGGTCAAGACCTGTACAAGATGAAAACCTGGTGAATACTGGGGACCAGCCTCTTAATCGGATGATCTTGTATTTCATGTTTGCATCAACAACAAGATCGAGTCCGGA  
CGCTCTGCAGGGGGCATATGCTGCTCCCGAACTGAAAATAGCTCGCTGTTGTTTTGCTTCACTGCTGGTGGAGAGGACACTGAAGAGCAGCAGCCGGGGAAGGAGGGGCC  
ACGGGTCAATTTATGACGAGAAGAAAGGCCACCTGTCTACATCTACTCCTACTTCCACTTCTGTTTCTTCTGCTGTTCCCTCTATGTGATGATGACTGTCAACAACCTGGTTCAACTA  
CGAAAAGTGCCAACATCGAGAGCTTCTTACGCGGGAGCTGGTCCATCTTCTGGTCAAGATGGCCTCCTGCTGGATATGCGTGTGTTGACCTGTGTACGCTGGTGCCTCC  
CCTCTGCTGCCCCACCCGGAGTCTCTGTGTGA

>papAnu2

ATGTCAGCTCAGTGTGTCAGGGCCAGCTGGCCTGCTGCTGTGGGTCTGCAGGCTGCTCTCTCTGCTGTGATTGCTGCCCCAGGATTGGCAGTCCCTCAGCACCCGCTTC  
ATGTACGCCCTACTTCACTTCTGGTGGTGGTCTCTGCTGCATCATGATGTCACAACCTGTGGCTCACAAGATGAAAGAGCACATTCCCTTTTTTGAAGATATGTGTAAGGGC  
AAGCTGGTGACACCTGTGAGAAGCTGGTGGGATATTCTGCCGTATAGAGTCTGTTTTGGAATGGCTGTTCTTCTTTATCTCTGCTACTGACCTTGAANAATCAACA  
TAGAGCTCATATTCACAATGGCTTTTGGTTCTTTAAACTTCTGCTGTTGGGGGCCATGTGCTCAGGAGCTTCTTCACTCCAGATCAGGACACCTTTCTGAAACGCTGGCGCTA  
TGTGGGAGCCGTCGGAGGCTTCCCTTTCATAGGCATCCAGCTCCTCCTGCTGTTGGAGTTTGCACATAAGTGGAAACAAGAACTGGACAGCAGGCCACAGCCAGTAAACAAGCT  
GTGGTAGCCCTGGCCCTGGTGACACTCATGATTTCCATTGCCACTGGAGGCTTGGTTTTGATGGAAATTTGCACATAAGTGGAAACAAGAACTGGACAGCAGGCCACGGT  
TCTGCTGGGAGTAAATGGAGCCCTATGCTGCTTATTTCATTTGGTAGCCACTCGCCCTGTGTCAAAATCGACAGCCGCACTCGGGCTCCTACAATCAGGGGCTCATAG  
CTGCTATGTCACCTACCTCCTCAGCTCTGTCCAGCAAACCTGCAGAAGTAGTTCTAGATGAACATGGGAAAAATGTTACAATCTGTGTGCTGACT  
GTACAGAGATGAAAACCTGGTGAATACTGGGGACCAGCCTCTTAATCGGATGATCTTATTTATTCATGTTTGCATCAACAACAAGATCGAGTCCGACGCTCTGCAGGGGG  
ATATGACGCTCCTGAGCTGAAAATAGCCCGCTGTTGTTTTTCTGCTCAGCTGGTGGAGAGGACACTGAAGAGCAGCAGCCGGGGAAGGAGGGACCAGGGTCAATTTATGA  
CGAAAAGAAAGGACCCGCTCACTACATCTACTCCTACTTCCACTTCTGTTTCTTCTGCTTCCCTGTATGTGATGATGACCTCAACAACCTGGTTCAATTCAGAAAAGTCCAACT  
CGAGAGCTTCTTACGCGGGAGCTGGTCCATCTTCTGGTCAAGATGGCCTCCTGCTGGATATGCGTGTGTTGACCTGTGTACGCTGGTGCCTCCCCTCTGCTGCCCCACC  
CGGGAGTCTCTGTGTGA

>hg38

ATGTCAGCTCAGTGTGTCGGGGCCAGCTGGCCTGCTGCTGTGGGTCTGCAGGCTGCTCTCTCTGCTGTGATTGCTGCCCCAGGATTGGCAGTCCCTCAGCACCCGCTTC  
ATGTACGCCCTACTTCACTTCTGGTGGTGGTCTCTGCTGCATCATGATGTCACAACCCGCTGGCTCACAAGATGAAAGAGCACATTCCCTTTTTTGAAGATATGTGTAAGGGC  
ATTAAGCTGGTGACACCTGTGAGAAGCTGGTGGGATATTCTGCCGTATAGAGTCTGTTTTGGAATGGCTGTTCTTCTTTATCTCTGCTACTGACCTTGAANAATCAACA  
AACAGCAAAAGTTGTAGAGCTCATATTCACAATGGCTTTTGGTTCTTTAAACTTCTGCTGTTGGGGGCCATGTGCTCAGGAGCTTCTTCACTCCAGATCAGGACACCTTTCTG  
AACGCCCTGGCGCTATGTGGGAGCCGTCGGAGGCTTCCCTTTCATGGCATCCAGCTCCTCCTGCTGTTGGAAATTTGCACATAAGTGGAAACAAGAACTGGACAGCAGGCCACA  
GCCAGTAAACAAGCTGTGGTAGCCCTCCTGGCCCTGGTGACGCTCATGATTTCCATTGCCACTGGAGGCTTGGTTTTGATGGCAGTGTTTTACACACAGAAAGACAGCT  
GCTGCTGCTGCCCCACCCGGAGTCTCTGTGTGA

GCATGGAAAAAATTTCTGCTGGGAGTAAATGGAGGCTGTGCCTGCTTATCATTGGTAGCCATTCACCCCTGGGTCCAAAATCGACAGCCCACTCGGGGCTCTTACA  
ATCAGGGGTCATAAGCTGCTATGTACCTACTCACCTTCTCAGCTGTCCAGCAAACTCGCAAGAGTAGTTCTAGATGAACATGGGAAAAATGTACAATCTGTGTGCTG  
ACTTTGGTCAAGACCTGTACAGAGATGAAAACCTGGTACTATACTGGGACCAGCCTCTAATCGGATGTATCTGTATTCTGTTGACATCAACAACAAGATCGAGTTCTG  
ACGCTCTGCAGGGGGCATACGCAGCTCCTGAATTGGAGATAGCTCGCTGTTGTTTTCCTCAGCTCGTGGAGAGGACACTGAAGAGCAGCAGCCGGGAAAGGAGGGAC  
CACGGGCTATTATGACGAGAAGAAAGCCAGCCTTACATCTACTCCTACTCCACTCGTGTGTTTCTCCTAGCTGTATGTGTGATGACCCGTACCAACTGGTCAACT  
ACGAAAAGTGCACAACTCGAGAGCTTCTTACGCGGGAGCTGGTCCATCTTCTGGGTCAAGATGGCCTCCTGCTGGATATGCGTGTGTTGTACCTGTGTACGCTGGTGCCTC  
CCTCTGCTGCCACCACCGGGAGTTCTCTGTGTGA

>macFas5

ATGTCAGCTCAGTGTGTGCAGGCCAGCTGGCCTGCTGCTGTGGGTCTGCAGGCTGCTCTCTGCTGTGATTGCTGCCCCAGGATTCGGCAGTCCCTGAGCACCCGCTTC  
ATGTACGCCCTCTACTTCATTCTGGTGTGCTGCTCTGCTGCATCATGATGTCAACAACCTGGGCTCACAAGATGAAAGAGCACATTCCTTTTTTGAAGATATGTGTAAGGC  
ATTAAGCTGGTGCACCTGTGAGAAGCTGGTGGGATATTCTGCCGTGTATAGAGTCTGTTTGGAAATGGCTGTTTCTTCTTTATCTCTGTCTACTGACCTTGAAAATCAAC  
AACAGCAAAAGTTGTAGAGCTCATATTCACAATGGCTTTTGGTCTTTAAACTCTGCTGTGGGGGCCATGTGCTCAGGAGCTTTCTCATTCCAGATCAGGACACCTTTCTA  
AACGCCTGGCGTATGTGGGAGCCGTGGAGGCTTCCCTTTCATAGGCATCCAGCTCCTCTGCTGCTGGAGTTTGCACATAAGTGAACAAGAAGTGGACAGCAGGCACA  
GCCAGTAAACAAGCTGTGGTACGCCCTCCCTGGCCCTGGTGCACCTCATCATGTATTCATTGCCACTGGAGGCTTGGTTTTGATGGCAGTGTGTTTACACACAGAAAAGCAGCTG  
GCATGGAAAACAAAATTTCTGCTGGGAGTAAATGGAGGCTATGCCTGCTTATTCATTGGTAGCCATTCACCCCTGGGTCCAAAATCGACAGCCCACTCGGGGCTCTTACAAT  
ATCAGGGGTCATAAGCTGCTATGTACCTACTCACCTTCTCAGCTGTCCAGCAAACTCGAGAAGTAGTTCTAGATGAACATGGGAAAAATGTTACAATCTGTGTGCTG  
ACTTCGGTCAAGACTGTACAGAGATGAAAACCTGGTACTATACTGGGACCAAGCTCTTAATCGGATGTATCTTATTCATGTTTACATAACAACAAGTCCAGTCCGATCCG  
ACGCTCTGCAGGGGGCATATGCAGCTCCTGAAGTGAAGTACGCCGCTGTTGTTTTGCTTCTCAGCTCGTGGAGAGGACACTGAAGAGCAGCAGCAGGGGAAAGGAGGGAC  
CCCGGGTCAATTTATGACGAGAAGAAAGCCAGCCTTACATCTACTCCTACTCCACTCGTGTGTTTCTCCTGGCTCCCTGTATGTGATGATGACCCGTACCAACTGGTTCGAAT  
ACGAAAAGTGCACAACTCGAGAGCTTCTTACGCGGGAGCTGGTCCATCTTCTGGGTCAAGATGGCCTCCTGCTGGATATGCGTGTGTTGTACCTGTGTACGCTGTGCTGCCCTC  
CCTCTGCTGCCCTACCCGGGAGTTCTCTGTGTGA

>nomLeu3

ATGTCAGCTCAGTGTGTGCGGGCCAGCTGGCCTGCTGCTGTGGGTCTGCAGGCTGCTCTCTGCTGTGATTGCTGCCCCAGGATTCGGCAGTCCCTGAGCACCCGCTTC  
ATGTACGCCCTCTACTTCATTCTGGTGTGCTGCTCTGCTGCATCATGATGTCAACAACCTGGGCTCACAAGATGAAAGAGCACATTCCTTTTTTGAAGATATGTGTAAGGC  
ATTAAGCTGGTGCACCTGTGAGAAGCTGGTGGGATATTCTGCCGTGTATAGAGTCTGTTTGGAAATGGCTGTTTCTTCTTTATCTCTGTCTACTGACCTTGAAAATCAAC  
AACAGCAAAAGTTGTAGAGCTCATATTCACAATGGCTTTTGGTCTTTAAACTCTGCTGTGGGGGCCATGTGCTCAGGAGCTTTCTCATTCCAGATCAGGACACCTTTCTG  
AACGCCTGGCGTATGTGGGAGCCGTGGAGGCTTCCCTTTCATTGGCATCCAGCTCCTCCTGCTGCTGGAGTTTGCACATAAGTGAACAAGAAGTGGACAGCAGGCACA  
GCCAGTAAACAAGCTGTGGTACGCTTCCCTGGCCCTGGTGCACCTCATCATGTATTCATTGCCACTGGAGGCTTGGTTTTGATGGCAGTGTGTTTACACACAGAAAAGCAGCTG  
CATGGAAAACAAAATTTCTGCTGGGAGTAAATGGAGGCTATGCCTGCTTATTCATTGGTAGCCATTCACCCCTGGGTCCAAAATCGACAGCCCACTCGGGGCTCTTACAAT  
CAGGGGTCATAAGCTGCTATGTACCTACTCACCTTCTCAGCTGTCCAGCAAACTCGAGAAGTAGTTCTAGATGAACATGGGAAAAATGTTACAATCTGTGTGCTGCTG  
TTTGTCAAGACCTGTACAGAGATGAAAACCTGGTACTATACTGGGACCAAGCTCTTAATCGGATGTATCTTATTCATGTTTACACACAGAAAAGTCCAGTCTGTGCTGAC  
GCTCTGCAGGGGGCATATGTACCTACTCACCTTCTCAGCTGTGTTGTTTTGCTTCTCAGCTCGTGGAGAGGACACTGAAGAGCAGCAGCAGGGGAAAGGAGGGACCA  
CGGGTCAATTTATGACGAAAAGAAAGCCAGCCTTACATCTACTCCTACTCCACTCGTGTGTTTCTCCTAGCTCCCTGTATGTGATGATGACCCGTACCAACTGGTTCGAAT  
GAAAAGTGCACAACTGTAGAGCTTCTTACGCGGGAGCTGGTCCATCTTCTGGGTCAAGATGGCCTCCTGCTGGATATGTGTGCTGTTGTACCTGTGTACGCTGGTGCCTCC  
TCTGCTGCCACCACCGGGAGTTCTCTGTGTGA

>ponAbe2

ATGTCAGCTCAGTGTGTGCGGGCCAGCTGGCCTGCTGCTGTGGGTCTGCAGGCTGCTCTCTGCTGTGATTGCTGCCCCAGGATTCGGCAGTCCCTGAGCACCTGCTTC  
ATGTACGCCCTCTACTTCATTCTGGTGTGCTGCTCTGCTGCATCATGATGTCAACAACCTGGGCTCACAAGATGAAAGAGCACATTCCTTTTTTGAAGATATGTGTAAGGC  
ATTAAGCTGGTGCACCTGTGAGAAGCTGGTGGGATATTCTGCCGTGTATAGAGTCTGTTTGGAAATGGCTGTTTCTTCTTTATCTCTGTCTACTGACCTTGAAAATCAAC  
AATAGCAAAAGTTGTAGAGCTCATATTCACAATGGCTTTTGGTCTTTAAACTCTGCTGTGGGGGCCATGTGCTCAGGAGCTTTCTCATTCCAGATCAGGACACCTTTCTG  
AACGCCTGGCGTATGTGGGAGCCGTGGAGGCTTCCCTTTCATTGGCATCCAGCTCCTCCTGCTGCTGGAGTTTGCACATAAGTGAACAAGAAGTGGACAGCAGGCACA  
GCCAGTAAACAAGCTGTGGTACGCTTCCCTGGCCCTGGTGCACCTCATCATGTATTCATTGCCACTGGAGGCTTGGTTTTGATGGCAGTGTGTTTACACACAGAAAAGCAGCTG  
GCATGGAAAACAAAATTTCTGCTGGGAGTAAATGGAGGCTATGCCTGCTTATTCATTGGTAGCCATTCACCCCTGGGTCCAAAATCGACAGCCCACTCGGGGCTCTTACA  
TCAGGGGTCATAAGCTGCTATGTACCTACTCACCTTCTCAGCTGTCCAGCAAACTCGAGAAGTAGTTCTAGATGAACATGGGAAAAATGTTACAATCTGTGTGCTGCTG  
CTTTGGTCAAGACCTGTACAGAGATGAAAACCTTGGTACTATACTGGGACCAAGCTCTTAATCGGATGTATCTTATTCATGTTTACATAACAACAAGTCCAGTCCGATCCGA  
CGCTCTGCAGGGGCGATACGAGCTCCTGAATTTGA-----  
ACACTGAAGAGCAGCAGCCGGGGAAGGAGGACCCAGGCTCATTATGATGAGAAGAAAGGCACAGCTACATCTACTCCTACTCCACTCGTGTGTTTCTCCTAGCTTCCT  
GTATGTGATGATGACCCGTACCAACTGGTTCACCTACGAAAAGTGCACAACTCGAGAGCTTCTTACGCGGGAGCTGGTCCATCTTCTGGGTCAAGATGGCCTCCTGCTGGATA  
TGCGTGTGTTGTACCTGTGTACGCTGTGCTGCCCTCTGCTGCCACCACCGGGAGTTCTCTGTGTGA

>rhoMac3

ATGTCAGCTCAGTGTGTGCGGGCCAGCTGGCCTGCTGCTGTGGGTCTGCAGGCTGCTCTCTGCTGTGATTGCTGCCCCAGGATTCGGCAGTCCCTGAGCACCCGCTTC  
ATGTACGCCCTCTACTTCATTCTGGTGTGCTGCTCTGCTGCATCATGATGTCAACAACCTGGGCTCACAAGATGAAAGAGCACATTCCTTTTTTGAAGATATGTGTAAGGC  
ATTAAGCTGGTGCACCTGTGAGAAGCTGGTGGGATATTCTGCCGTGTATAGAGTCTGTTTGGAAATGGCTGTTTCTTCTTTATCTCTGTCTACTGACCTTGAAAATCAAC  
AACAGCAAAAGTTGTAGAGCTCATATTCACAATGGCTTTTGGTCTTTAAACTCTGCTGTGGGGGCCATGTGCTCAGGAGCTTTCTCATTCCAGATCAGGACACCTTTCTA  
AACGCCTGGCGTATGTGGGAGCCGTGGAGGCTTCCCTTTCATTGGCATCCAGCTCCTCCTGCTGCTGGAGTTTGCACATAAGTGAACAAGAAGTGGACAGCAGGCACA  
GCCAGTAAACAAGCTGTGGTACGCCCTCCCTGGCCCTGGTGCACCTCATCATGTATTCATTGCCACTGGAGGCTTGGTTTTGATGGCAGTGTGTTTACACACAGAAAAGCAGCTG  
GCATGGAAAACAAAATTTCTGCTGGGAGTAAATGGAGGCTATGCCTGCTTATTCATTGGTAGCCATTCACCCCTGGGTCCAAAATCGACAGCCCACTCGGGGCTCTTACA  
ATCAGGGGTCATAAGCTGCTATGTACCTACTCACCTTCTCAGCTGTCCAGCAAACTCGAGAAGTAGTTCTAGATGAACATGGGAAAAATGTTACAATCTGTGTGCTGCTG  
ACCTTCGGTCAAGACCTGTACAGAGATGAAAACCTGGTACTATACTGGGACCAAGCTCTTAATCGGATGTATCTTATTCATGTTTACACACAGAAAAGTCCAGTCCGATCCG  
GCTCTGCAGGGGGCATATGCAGCTCCTGAAGTGAAGTACGCCGCTGTTGTTTTGCTTCTCAGCTCGTGGAGAGGACACTGAAGAGCAGCAGCAGGGGAAAGGAGGGAC  
CCCGGGTCAATTTATGACGAGAAGAAAGCCAGCCTTACATCTACTCCTACTCCACTCGTGTGTTTCTCCTGGCTCCCTGTATGTGATGATGACCCGTACCAACTGGTTCGAAT  
ACGAAAAGTGCACAACTCGAGAGCTTCTTACGCGGGAGCTGGTCCATCTTCTGGGTCAAGATGGCCTCCTGCTGGATATGCGTGTGTTGTACCTGTGTACGCTGGTGCCTC  
CCTCTGCTGCCCTACCCGGGAGTTCTCTGTGTGA

SERINC5-iso2

>panPan1

ATGTCAGCTCAGTGTGTGCGGGCCAGCTGGCCTGCTGCTGTGGGTCTGCAGGCTGCTCTCTGCTGTGATTGCTGCCCCAGGATTCGGCAGTCCCTGAGCACCCGCTTC  
ATGTACGCCCTCTACTTCATTCTGGTGTGCTGCTCTGCTGCATCATGATGTCAACAACCTGGGCTCACAAGATGAAAGAGCACATTCCTTTTTTGAAGATATGTGTAAGGC  
AAGCTGGTGCACCTGTGAGAAGCTGGTGGGATATTCTGCCGTGTATAGAGTCTGTTTGGAAATGGCTGTTTCTTCTTTATCTCTGTCTACTGACCTTGAAAATCAAC  
GTAGAGCTCATATTCACAATGGCTTTTGGTCTTTAAACTCTGCTGTGGGGGCCATGTGCTCAGGAGCTTTCTTCAATCCAGATCAGGACACCTTTCTGAACGCTGGCGCT  
ATGTGGGAGCCGTGGAGGCTTCCCTTTCATTGGCATCCAGCTCCTCCTGCTGCTGGAGTTTGCACATAAGTGAACAAGAAGTGGACAGCAGGCACAGCCAGTAAACAAGCT  
GTGGTACGCTCCTGGCCCTGGTGGAGTAAATGGAGGCTATGCCTGCTTATTCATTGGTAGCCATTCACCCCTGGGTCCAAAATCGACAGCCCACTCGGGGCTCTTACA  
ATTCCTGCTGGGAGTAAATGGAGGCTATGCCTGCTTATTCATTGGTAGCCATTCACCCCTGGGTCCAAAATCGACAGCCCACTCGGGGCTCTTACAATCAGGGGTCATAAG  
CTGCTATGTACCTACTCACCTTCTCAGCTGTCCAGCAAACTCGAGAAGTAGTTCTAGATGAACATGGGAAAAATGTTACAATCTGTGTGCTGACTTTGGTCAAGACCT  
GTACAGAGATGAAAACCTTGGTACTATACTGGGACCAAGCCTTAAATCGGATGTATCTTATTCATTGGTAGCCATTCACCCCTGGGTCCAAAATCGACAGCCCACTCGGGG  
GATACGAGCTCCTGAATTTGAAAATAGCTGCTGTTGTTTTGCTTCACTGCTGGTGGAGAGGACACTGAAGAGCAGCAGCAGCCGGGAAAGGAGGGACCAAGGCTCATTATG  
ACGAGAAGAAAGGCACCGTCTACATCTACTCCTACTCCACTCGTGTGTTTCTCCTAGCTTCCTGTATGTGATGATGACCCGTACCAACTGGTTCAAAagtgctttaccctctgcatga

>rhoRox1

ATGTCAGCTCAGTGTGTGCGGGCCAGCTGGCCTGCTGCTGTGGATCTGCAGGCTGCTCTCTGCTGTGATTGCTGCCCCAGGATTCGGCAGTCCCTGAGCACCCGCTTC  
ATGTACGCCCTCTACTTCATTCTGGTGTGCTGCTCTGCTGCATCATGATGTCAACAACCTGGGCTCACAAGATGAAAGAGCACATTCCTTTTTTGAAGATATGTGTAAGGC  
ATTAAGCTGGTGCACCTGTGAGAAGCTGGTGGGATATTCTGCCGTGTATAGAGTCTGTTTGGAAATGGCTGTTTCTTCTTTATCTCTGTCTACTGACCTTGAAAATCAAC  
AACAGCAAAAGTTGTAGAGCTCATATTCACAATGGCTTTTGGTCTTTAAACTCTGCTGTGGGGGCCATGTGCTCAGGAGCTTTCTTCAATCCAGATCAGGACACCTTTCTG  
AACGCCTGGCGTATGTGGGAGCCGTGGAGGCTTCCCTTTCATAGGCATCCAGCTCCTCTGCTGCTGGAGTTTGCACATAAGTGAACAAGAAGTGGACAGCAGGCACA  
GCCAGTAAACAAGCTGTGGTACGCCCTCCCTGGCCCTGGTGCACCTCATCATGTATTCATTGCCACTGGAGGCTTGGTTTTGATGGCAGTGTGTTTACACACAGAAAAGCAGCTG  
GCATGGAAAACAAAATTTCTGCTGGGAGTAAATGGAGGCTATGCCTGCTTATTCATTGGTAGCCATTCACCCCTGGGTCCAAAATCGACAGCCCACTCGGGGCTCTTACA  
TCAGGGGTCATAAGCTGCTATGTACCTACTCACCTTCTCAGCTGTCCAGCAAACTCGAGAAGTAGTTCTAGATGAACATGGGAAAAATGTTACAATCTGTGTGCTGACTTTGGTCAAGACCT  
CAGGGGTCATAAGCTGCTATGTACCTACTCACCTTCTCAGCTGTCCAGCAAACTCGAGAAGTAGTTCTAGATGAACATGGGAAAAATGTTACAATCTGTGTGCTGCTG  
CTTTGGTCAAGACCTGTACAGAGATGAAAACCTGGTACTATACTGGGACCAAGCCTTAAATCGGATGTATCTTATTCATTGGTAGCCATTCACCCCTGGGTCCAAAATCGACAGCCCACTCGGGG  
GATACGAGCTCCTGAATTTGAAAATAGCTGCTGTTGTTTTGCTTCACTGCTGGTGGAGAGGACACTGAAGAGCAGCAGCAGCCGGGAAAGGAGGGACCAAGGCTCATTATG  
ACGAGAAGAAAGGCACCGTCTACATCTACTCCTACTCCACTCGTGTGTTTCTCCTAGCTTCCTGTATGTGATGATGACCCGTACCAACTGGTTCAAAagtgctttaccctctgcatga

ACGGGTGTCATTTATGATGAGAAGAAAGGCCACCGTCTACATCTACTCTACTCCACTTTGTGTTCTTCTGGCTTCCCTGTATGTGATGATGACCGTCACCAACTGGTTCAAaggt  
gcctttgctcctgccatga  
>gorGor3  
ATGTCAGCTCAGTGTGTCGGGGCCAG-----  
ATTCTTTTTTTGAAGATATGTGTAAGGCATTAAAGCTGGTGACACCTGTGAGAAGCTGGTGGGATATTCTGCCGTGTATAGAGTCTGTTTTGGAATGGCTTGTTTTCTTTTA  
TCTTCTGTCTACTGACCTGAAATCAACAACAGCAAAAGTTGTAGAGCTCATATTCACAATGGCTTTGGTCTTTAAACTTCTGCTGTTGGGGCCATGTGCTCAGGAGCTT  
TCTTCATTCCAGTACGAGCACCTTTCTGAACGCTGGCCGTATGTGGGAGCTTCCCTTTCATTGGCATCCAGCTCCTCTGCTCGTGAAGTTTGCACATAA  
GTGGAATAAGAAGTGGACAGCAGGCACAGCCAGTAAACAAGCTGGTACGCCTCCTGGCCCTGGTGACGCTCATCATGTATCCATTGCCACTGGAGGCTTGGTTTTGATG  
GCAGTGTTTATACGCAGAAAGAGCGGCTGCATGGAACAAACAAATTTCTGCTGGGAGTAAATGGAGGCTATGCCTGCTTATTTTCATTGGTAGCCATCTCACCTGGTCCAAAA  
TCGACAGCCACACTCGGGGCTCTTACAATCAGGGGTCTAAAGCTGTATGTCACCTCACCTTCTCAGCTTTCGACGCTTTCGACGAAACCTGCAGAAGTAGTTCTAGATGAACATG  
GGAAAAATGTTACAATCTGTGTGCTGACTTTGGTCAAGACCTGTACAGAGATGAAAACTGGTGACTATACTGGGGACAGCCCTTAAATCGGATGTATCTTGTATTCATGTT  
TGACATCAACAACAAGATCGAGTTGACGCTGTGACGGGGCATACGAGCTCTGAATTTGAAATAGCTCGCTGTTGTTTTGCTTCAGTCTGCTGGTGGAGGACACAGA  
AGAGCAGCAGCCGGAAAGGAGGACCAGGGTCAATTTAGACGAGAAGAAAGGCCACCGTCTACATCTACTCTACTTCCACTTCGTTCTTCTAGCTTCCCTGTATGTG  
ATGATGACTGTCCCACTGTTCAAagtgctttaccctcctgctatg  
>panTro4  
ATGTCAGCTCAGTGTGTCGGGGCCAGCTGGCCTGCTGCTGTGGGTCTGCAGGCTGCTCTCTCTGCTGTGATTGCTGCCCCAGGATTGGCAGTCCCTGAGCACCCTTC  
ATGTACGCCCTCTACTTCACTTCTGGTCTGCTCTGTCATCATGATGTCAACAACCTGGCTCACAAGATGAAAGAGCACATTCCTTTTTTGAAGATATGTGTAAGGCC  
ATTAAGCTGGTGACACCTGTGAGAAGCTGGTGGGATATTCTGCCGTGTATAGAGTCTGTTTTGGAATGGCTTGTTTTCTTCTTATCTCTGTCTACTGACCTGAAATCAAC  
AACAGCAAAAGTTGTAGAGCTCATATTCACAATGGCTTTGGTCTTTAAACTTCTGCTGTTGGGGCCATGTGCTCAGGAGCTTCTTCAATCCAGATCAGGACACCTTCTG  
AACGCCTGGCGCTATGTAGAGCTGTGAGAGCTGGTGGGATATTCTGCCGTATATAGAGTCTGTTTTGGAATGGCTTGTTTTCTTCTTATCTCTGCTACTGACCTGAAATCAAC  
GCCAGTAAACAAGCTGTGGTACGCTTCCCTGGCCCTGGTGACACTCATCATGTATTCATTGCCACTGGAGGCTTGGTTTTGATGGCAGTGTTTTACACAGAAAGACCGCTG  
CATGGAACAAACAAATTTCTGCTGGGAGTAAATGGAGGCTATGCCTGCTTATTTCTGGTGGTACGCTCACCTCACCCTGGGTCAAAAATCGACAGCAGCTTCAACAT  
CAGGGGTCTAAAGCTGTATGTACCTACCTCACCTTCTCAGCTCTGTCCAGCAAACTGCAGAAGTAGTTCTAGATGAACATGGGAAAAATGTTACAATCTGTGTGCTGAC  
TTTGGTCAAGACCTGTACAGAGATGAAAACTGGTGACTATACTGGGACAGCCCTTAAATCGGATGTATCTTGTATTCATGTTTACATCAACAACAAGATCAAGTTCTGAC  
GCTCTGCAGGGGCGATACGACGCTCTGAATTTGAAATAGCTCGCTGTTGTTTTGCTTCAGTCTGCTGGTGGAGAGGACACTGAAGAGCAGCAGCCGGGGAAGGAGGGACCA  
CGGGTCATTTATGACGAGAAGAAAGGCCACCGTCTACATCTACTCTACTTCCACTTCGTTCTTCTAGTCCCTGTATGTGATGATGACCGTCACCAACTGGTTCAAagtg  
cctttaccctccaccatga  
>calJac3  
ATGTCAGCTCAGTGTGTCGGGGCCAGCTGGCCTGCTGCTGTGGGTCTGCAGGCTGCTCTCTCTGCTGTGATTGCTGCCCCAGGATTGGCAGTCCCTGAGCACCCTTC  
ATGTACGCCCTCTACTTCACTTCTGGTCTGCTCTGTCATCATGATGTCAACAACCTGTAGCTCACAAGATGAAAGAGCACATTCCTTTTTTGAAGAAATGTGTAAGGGT  
ATAAAGCTGGTGACACCTGTGAGAAGCTGGTGGGATATTCTGCCGTATATAGAGTCTGTTTTGGAATGGCTTGTTTTCTTCTTATCTCTGCTACTGACCTGAAATCAAC  
ACGCAAAAGTTGTAGAGCTCATATTCACAATGGCTTTGGTCTTTAAACTTCTGCTGTTGGGGCCATGTGCTCAGGAGCTTCTTCAATCCAGATCAGGACACCTTCTGA  
ACGCTGGCGCTACGTTGGAGCCATCGGAGGCTTCTCTTTATCGGCATCCAGCTCCTCTGCTTGTGGAATTTGCACATAAGTGAACAAGAAGTGGACAGCAGGCACGG  
CCAGTAAACAAGCTGTGGTATGCCTCACTGGCCCTGGTGACGCTCATCATGATTTCTGTTGCCACTGGAGGCTTGGTTTTCGATGGCAGTGTTTTACACACAGAAAGATGGCTG  
ATGGAACAAACAAATTTCTGCTGGGAGTGAATGGAGGCTGTGCTGCTTATTTCAATGGTAGCCATCTGCCCCAGTGTCCAAAAATCGACAGCCACACTCGGGGCTCCTACAG  
CTGGGCTCATAAGCTGTATGTACCTACCTCACCTTCTCAGCTCTGTCTGCAAACTGCAGAAAGTAGTTCTAGATGAGCATGGGAAAAATATTACAATCTGTGTGCTCAACT  
TTGGTCAAGACCTGTACAAGATGACAGCTTACTATGGGACCGCCCTTAAATCGGATGTATCTTGTATTCATGTTTACATCAACAACAAGATCAAGTTCTGAGTCCGAC  
GCTCTGCAGGGGCGATATGACGCTCTGAGCTGGAATAGCTCGCTGTTGTTTTGCTTCAGTCTGCTGGTGGAGAGGACACTGAAGAGCAGCAGCCGGGGAAGGAGGGCCA  
CGGGTCATTTACGACGAGAAGAAAGGCCACCGTCTACATCTACTCTACTTCCACTTCGTTCTTCTGGCTTCTCTATGTGATGATGACCGTCACCAACTGGTTCAAagtg  
cctttgctcctgccatga  
>nasLar1  
ATGTCAGCTCAGTGTGTCAGGCCAG-----  
ATTCTTTTTTTGAAGATATGTGTAAGGCATTAAAGCTGGTGACACCTGTGAGAAGCTGGTGGGATATTCTGCCGTGTATAGAGTCTGTTTTGGAATGGCTTGTTTTCTTTTA  
TCTTCTGTCTACTGACCTGAAATCAACAACAGCAAAAGTTGTAGAGCTCATATTCACAATGGCTTTGGTCTTTAAACTTCTGCTGTTGGGGCCATGTGCTCAGGAGCTT  
TCTTCATTCCAGTACGAGCACCTTTCTGAACGCTGGCCGTATGTGGGAGCCCTGGCGCTATGTGGGAGCCCTGGAGGCTTCCCTTTCATAGGCATCCAGCTCCTCTGCTCGTGGAGTTTGCACATAA  
GTGGAACAAAGTGGACAGCAGGCACAGCCAGTAAACAAGCTGGTGTACGCCTCCTGCCCTGGTGACACTCATCATGTATTCATTGCCACTGGAGGCTTGGTTTTGATG  
GCAGTGTTTACACACAGGAGCCGCTGCATGGGAAACAAATTTCTGCTGGGAGTAAATGGAGGCTATGCCTGCTTATTTCAATGGTAGCCATCTGCCCTGTATTTTGCACATA  
TCGACAGCCGACTCAGGGCTCTACAATCAGGGTCTAAAGCTGTATGTACCTACCTCACCTTCTCAGCTCTGTCCAGCAAACTGCAGAAGTAGTTCTAGATGAACATG  
GGAAAAATGTTACAATCTGTGTGCTGACTTTGGTCAAGACCTGTACAGAGATGAAAACTGGTGACTATACTGGGACAGCCCTTAAATCGGATGTATCTTATATCATGT  
TGACATCAACAACAAGATCGAGTTCCGACGCTGTGACGGGCGATATGACGCTCCTGAATTTGAAATAGCCCGCTGTTTTTGGCTTCAGTCTGCTGGTGGAGAGG-----  
-----aagtgct-----cctgccatga  
>chlSab2  
ATGTCAGCTCAGTGTGTCAGGCCAGCTGGCCTGCTGCTGTGGGTCTGCAGGCTGCTCTCTCTGCTGTGATTGCTGCCCCAGGATTGGCAGTCCCTGAGCAGTCCGCTTC  
ATGTACGCCCTCTACTTCACTTCTGGTCTGCTCTGTCATCATGATGTCAACAACCTGGCTCACAAGATGAAAGAGCACATTCCTTTTTTGAAGATATGTGTAAGGGT  
ATAAAGCTGGTGACACCTGTGAGAAGCTGGTGGGATATTCTGCCGTGTATAGAGTCTGTTTTGGAATGGCTTGTTTTCTTCTTATCTCTGCTACTGACCTGAAATCAAC  
AACAGCAAAAGTTGTAGAGCTCATATTCACAATGGCTTTGGTCTTTAAACTTCTGCTGTTGGGGCCATGTGCTCAGGAGCTTCTTCAATCCAGATCAGGACACCTTCTG  
AACGCCTGGCGCTATGTAGAGCTCATATTCACAATGGCTTTGGTCTTTAAACTTCTGCTGTTGGGGCCATGTGCTCAGGAGCTTCTTCAATCCAGATCAGGACACCTTCTG  
GCCAGTAAACAAGCTGTGGTACGCTCCTGGCCCTGGTGACACTCATCATGTATTCATTGCCACTGGAGGCTTGGTTTTGATGGCAGTGTTTTACACACAGAAAGACGGCT  
GCATGGAACAAACAAATTTCTGCTGGGAGTAAATGGAGGCTATGCCTGCTTATTTCAATGGTAGCCATCTGCCCTGTGTCCAAAAATCGACAGCCGACTCGGGGCTCCTCA  
ATCAGGGGCTACAGCTGTATGTACCTACCTCACCTTCTCAGCTCTGTCCAGCAAACTGCAGAAGTAGTTCTAGATGAACATGGGAAAAATGTTACAATCTGTGTGCTG  
ACCTTGGTCAAGACCTGTACAGAGATGAAACTTTGGTACTATACTGGGACAGCCCTTAAATCGGATGTATCTTATATTCATGTTTACGCTCAACAACAAGATCGAGTCCG  
AGCTCTGCAGGGGCGATATGACGCTCTGAATTTGAAATAGCCCGCTGTTTTGCTTCAGTCTGCTGGTGGAGAGGACACTGAAGAGCAGCAGCCGGGGAAGGAGGGAC  
CAGGGTCAATTTATGACGAGAAGAAAGGCCACTGTCTACATCTACTCTACTTCCACTTTGTGTTCTTCTGGCTTCCCTGTATGTGATGATGACCGTCACCAACTGGTTCAAaa  
gtgctttgctcctgccatga  
>salBol1  
ATGTCAGCTCAGTGTGTCGGGGCCAGCTGGCCTGCTGCTGTGGGTCTGCAGGCTGCTCTCTCTGCTGTGATTGCTGCCCCAGGATTGGCAGTCCCTGAGCACCCTTC  
ATGTACGCCCTCTACTTCACTTCTGGTCTGCTCTGTCATCATGATGTCAACAACCTGGCTCACAAGATGAAAGAGCACATTCCTTTTTTGAAGATATGTGTAAGGGC  
ATTAAGCTGGTGACACCTGTGAGAAGCTGGTGGGATATTCTGCCGTATATAGAGTCTGTTTTGGAATGGCTTGTTTTCTTCTTATCTCTGCTACTGACCTGAAATCAACA  
ACAGCAAAAGTTGTAGAGCTCATATTCACAATGGATTTGGTCTTTAAACTTCTGCTGTTGGGGCCATGTGCTCAGGAGCTTCTTCAATCCAGATCAGGACACCTTCTG  
ACGCTGGCGCTACGTTGGAGCCATCGGAGGCTTCCCTTTTATGGCATCCAGCTCCTCTGCTTGTGGAATTTGCACATAAGTGAACAAGAAGTGGACAGCAGGCACGG  
CCAGTAAACAAGCTGTGGTACGCTCCTGGCCCTGGTGACGCTCATCATGTATTCCTGCGCCACTGGAGGCTTGGTTTTGATGGCAGTGTTTTACACACAGAAAGACGGCT  
CATGGAACAAACAAATTTCTGCTGGGAGTGAACGGAGCCCTGTGCTGCTTATTTCAATGGTAGCCATCTGCCCTGTGTCCAGAATCGACAGCCACACTCGGGGCTCTACA  
TCAGGGGTCTAAAGCTGTATGTACCTACCTCACCTTCTCAGCTCTGTCCAGCAAACTGCAGAAGTGGTCTAGATGAGCATGGGAAAAATATTACAATCTGTGTGCTTAA  
CTTTGGTCAAGACCTGTACAAGATGAAACTTTGGTACTATACTGGGACAGCCCTTAAATCGGATGTATCTTGTATTCATGTTTACATCAACAACAAGATCGAGTCCGGA  
CGCTCTGCAGGGGCGATATGCTGCTCCGAACTGGAATAGCTCGCTGTTGTTTTGCTTCAGTCTGCTGGTGGAGAGGACACTGAAGAGCAGCAGCCGGGGAAGGAGGGCC  
ACGGGTCAATTTATGACGAGAAGAAAGGCCACCGTCTATGTCTATTCTACTTCCACTTCGTTGTTTTCTGCTTCCCTCTATGTGATGATGACTGTCCCAACTGGTTCAAagtg  
gctctcctcctgccatga  
>papAnu2  
ATGTCAGCTCAGTGTGTCAGGCCAGCTGGCCTGCTGCTGTGGGTCTGCAGGCTGCTCTCTCTGCTGTGATTGCTGCCCCAGGATTGGCAGTCCCTGAGCACCCTTC  
ATGTACGCCCTCTACTTCACTTCTGGTCTGCTCTGTCATCATGATGTCAACAACCTGGCTCACAAGATGAAAGAGCACATTCCTTTTTTGAAGATATGTGTAAGGGTAA  
AAGCTGGTGACACCTGTGAGAAGCTGGTGGGATATTCTGCCGTGTATAGAGTCTGTTTTGGAATGGCTTGTTTTCTTCTTATCTCTGCTACTGACCTGAAATCAACA  
TAGAGCTATATTCACAATGGCTTTGGTCTTTAAACTTCTGCTGTTGGGGCCATGTGCTCAGGAGCTTCTTCAATCCAGATCAGGACACCTTCTGAACGCTGGCGCTGA  
TGTGGGAGCCGTCGGAGGCTTCTCTTTCATAGGCATCCAGCTCCTCTGCTCGTGGAGTTGCACATAAGTGAACAAGAAGTGGACAGCAGGCACAGCCAGTAAACAAGCT  
TTGGTACGCTCCTTGGCCCTGGTGACACTCATCATGTATTCATTGCCACTGGAGGCTTGGTTTTGATGGCAGTGTTTTACACACAGAAAGACGGCTGCATGGAACAAACAA  
TCTCTGGGAGTAAATGGAGGCTATGCCTGCTTATTTCAATGGTAGCCATCTGCCCTGTGTCCAAAAATCGACAGCCGACTCGGGGCTCCTACAATCAGGGGCTCATAAG  
CTGCTATGTACCTACCTCAGCTTCTCAGCTCTGTCCAGCAAACTGCAGAAGTAGTTCTAGATGAACATGGGAAAAATGTTACAATCTGTGTGCTTGGTCAAGACCT  
TACAGAGATGAAAACTTTGGTACTATACTGGGACAGCCCTTAAATCGGATGTATCTTATATTCATGTTTACATCAACAACAAGATCGAGTCCGAGGCTTGGTCAAGGCT  
ATATGACGCTCTGAGCTGGAATAGCCCGCTGTTGTTTTGCTTCAGTCTGCTGGTGGAGAGGACACTGAAGAGCAGCAGCAGGGGAAGGAGGGACCACGGGTCAATTTATGA  
CGAGAAGAAAGGCCACTGTACATCTACTCTACTTCCACTTCGTTCTTCTGGCTTCCCTGTATGTGATGATGACCGTCACCAACTGGTTCAAagtgctttgctcctgccatga

>hg38

ATGTACAGCTCAGTGTGTGCGGGCCAGCTGGCCCTGCTGCTGTGGGTCTGCAGGCTGCTCTCTCTGCTGTGATTGCTGCCCCAGGATTGGCAGTCCCTCAGCACCCGCTTC  
ATGTACGCCCTCTACTTCTCTGGTGTGCTGCTCTGCTGTCATCATGATGTCAACAACCGTGGCTCACAAGATGAAAGAGCACATTCCTTTTTTGAAGATATGTGTAAGGGC  
ATTAAGCTGGTGTACACCTGTGAGAAGCTGGTGGGATATTCTGCCGTGTATAGAGTGTGTTTTGAAATGGCTTGTCTCTTTTATCTCTGTCTACTGACCTTGAAATCAAC  
AACAGCAAAGTGTAGAGCTCATATTCACAATGGCTTTGGTCTTTAAACTTCTGCTGTTGGGGCCATGTGCTCAGGAGCTTTCTTATCCAGATCAGGACACCTTTCTA  
AACGCCGTGGCGCTATGTGGGAGCCGTCGGAGGCTTCTCTTTCATAGGCATCCAGCTCCTCTGCTGCTGGAGTTTGCACATAAGTGGAAACAAGAACTGGACAGCAGGCACA  
GCCAGTAAACAGCTGTGGTACGCCTGGCCCTGGTACGCTCATGATTTCCATTGTCCACTGGAGGCTTGGTTTTGATGGCAGTTTTATACAGAAAAGACAGCT  
GCATGGAAACAAAATTTCTGCTGGGAGTAAATGGAGGCTGTGCTGCTTATATCATTGGTAGCCATCTCACCTGGTCCAAAATCGACAGCCACACTCGGGGCTCTTACA  
ATCAGGGGTCATAAGCTGCTATGTACCCTACCTCACCTTCTCAGCTCTGTCCAGCAAACTGCAGAAGTAGTCTTAGATGAACATGGGAAAAATGTTACAATCTGTGTGCTCG  
ACCTTTGGTCAAGACCTGTACAGAGATGAAAACCTGGTACTATACTGGGACCAGCCTTAAATCGGATGTATCTTATTCATGTTTGACATCAACAACAAGATCGAGTTCTG  
ACGCTCTGCAGGGGCGATACGACAGCTCCTGAATTGGAGATAGCTCGCTGTTGTTTTGCTTCACTGCTCGTGGAGAGGACACTGAAGAGCAGCAGCCGGGGAAGGAGGGAC  
CACGGGTCAATTTATGACGAGAAGAAAGGCACCGTCTACATCTACTCCTACTTCCACTTCGTGTTCTTCTAGCTCCCTGTATGTGATGATGACCGTCACCAACTGGTTCAAaa

gtgcccttccactcctgcatga

>macFas5

ATGTACAGCTCAGTGTGTGCGGGCCAGCTGGCCCTGCTGCTGTGGGTCTGCAGGCTGCTCTCTCTGCTGTGATTGCTGCCCCAGGATTGGCAGTCCCTGAGCACCCGCTTC  
ATGTACGCCCTCTACTTCTCTGGTGTGCTGCTCTGCTGTCATCATGATGTCAACAACCGTGGCTCACAAGATGAAAGAGCACATTCCTTTTTTGAAGATATGTGTAAGGGC  
ATTAAGCTGGTGTACACCTGTGAGAAGCTGGTGGGATATTCTGCCGTGTATAGAGTGTGTTTTGAAATGGCTTGTCTCTTTTATCTCTGTCTACTGACCTTGAAATCAAC  
AACAGCAAAGTGTAGAGCTCATATTCACAATGGCTTTGGTCTTTAAACTTCTGCTGTTGGGGCCATGTGCTCAGGAGCTTTCTTATCCAGATCAGGACACCTTTCTA  
AACGCCGTGGCGCTATGTGGGAGCCGTCGGAGGCTTCTCTTTCATAGGCATCCAGCTCCTCTGCTGCTGGAGTTTGCACATAAGTGGAAACAAGAACTGGACAGCAGGCACA  
GCCAGTAAACAGCTGTGGTACGCCTGGCCCTGGTACACTCATGATTTCCATTGGCAACTGCGAGGCTTGGTTTTGATGGCAGTTGTTTTGATGGCAGTTTTGATGGCAGTTTTG  
GCATGGAAAAAAAATTTCTGCTGGGAGTAAATGGAGGCTATGCGTGTATTTTCATTGGTAGCCATCTCGCCCTGTGTCACAAAATCGACAGCCGACCTCGGGGCTCTTACA  
ATCAGGGGTCATAAGCTGCTATGTACCCTACCTCACCTTCTCAGCTCTGTCCAGCAAACTGCAGAAGTAGTCTTAGATGAACATGGGAAAAATGTTACAATCTGTGTGCTCG  
ACTTGGTCAAGACCTGTACAGAGATGAAAACCTGGTACTATACTGGGACCAGCCTTAAATCGGATGTATCTTATTCATGTTTGACATCAACAACAAGATCGAGTTCCG  
ACGCTCTGCAGGGGCGATACGACAGCTCCTGAATGGAAATAGCCCGCTGTTGTTTTGCTTCACTGCTCGTGGAGAGGACACTGAAGAGCAGCAGCAGGGGGAAGGAGGGAC  
CCCGGTCAATTTATGACGAGAAGAAAGGCACCGTCTACATCTACTCCTACTTCCACTTCGTGTTCTTCTAGCTCCCTGTATGTGATGATGACCGTCACCAACTGGTTCAAaa

gtgcccttgcctcctgcatga

>nomLeu3

ATGTACAGCTCAGTGTGTGCGGGCCAGCTGGCCCTGCTGCTGTGGGTCTGCAGGCTGCTCTCTCTGCTGTGATTGCTGCCCCAGGATTGGCAGTCCCTGAGCACCCGCTTC  
ATGTACGCCCTCTACTTCTCTGGTGTGCTGCTCTGCTGTCATCATGATGTCAACAACCGTGGCTCACAAGATGAAAGAGCACATTCCTTTTTTGAAGATATGTGTAAGGGC  
ATTAAGCTGGTGTACACCTGTGAGAAGCTGGTGGGATATTCTGCCGTGTATAGAGTGTGTTTTGAAATGGCTTGTCTCTTTTATCTCTGTCTACTGACCTTGAAATCAAC  
AACAGCAAAGTGTAGAGCTCATATTCACAATGGCTTTGGTCTTTAAACTTCTGCTGTTGGGGCCATGTGCTCAGGAGCTTTCTTATCCAGATCAGGACACCTTTCTA  
AACGCCGTGGCGCTATGTGGGAGCCGTCGGAGGCTTCTCTTTCATAGGCATCCAGCTCCTCTGCTGCTGGAGTTTGCACATAAGTGGAAACAAGAACTGGACAGCAGGCACA  
GCCAGTAAACAGCTGTGGTACGCCTCCCTGGCCCTGGTACGCTCATGATTTCCATTGGCAACTGCGAGGCTTGGTTTTGATGGCAGTTTTTATACAGAAAAGACGCTGTG  
CATGGAAAAAAAATTTCTGCTGGGAGTAAATGGAGGCTATGCCTGCTTATTTTCATTGGTAGCCATCTCACCTGGTCCAAAATCGACAGCCACACTCGGGGCTCTTACAAT  
CAGGGGTCATAAGCTGCTATGTACCCTACCTCACCTTCTCAGCTCTGTCCAGCAAACTGCAGAAGTAGTCTTAGATGAACATGGGAAAAATGTTACAATCTGTGTGCTCG  
TTTGCTCAAGACCTGTACAGAGATGAAAACCTGGTACTATACTGGGACCAGCCTTAAATCGGATGTATCTTATTCATGTTTGACATCAACAACAAGATCGAGTTCTGAC  
GCTCTGCAGGGGCGATACGACAGCTCCTGAATGGAAATAGCTCGCTGTTGTTTTGCTTCACTGCTCGTGGAGAGGACACTGAAGAGCAGCAGCAGGGGGAAGGAGGGACA  
CGGGTCAATTTATGACGAAAAGAAAGGCACCGTCTACATCTACTCCTACTTCCACTTCGTGTTCTTCTAGCTCCCTGTATGTGATGATGACCGTCACCAACTGGTTCAAaagt

ctttccactcctgcatga

>ponAbe2

ATGTACAGCTCAGTGTGTGCGGGCCAGCTGGCCCTGCTGCTGTGGGTCTGCAGGCTGCTCTCTCTGCTGTGATTGCTGCCCCAGGATTGGCAGTCCCTGAGCACCTCGCTTC  
ATGTACGCCCTCTACTTCTCTGGTGTGCTGCTCTGCTGTCATCATGATGTCAACAACCGTGGCTCACAAGATGAAAGAGCACATTCCTTTTTTGAAGATATGTGTAAGGGC  
ATTAAGCTGGTGTACACCTGTGAGAAGCTGGTGGGATATTCTGCCGTGTATAGAGTGTGTTTTGAAATGGCTTGTCTCTTTTATCTCTGTCTACTGACCTTGAAATCAAC  
AATAGCAAAGTGTAGAGCTCATATTCACAATGGCTTTGGTCTTTAAACTTCTGCTGTTGGGGCCATGTGCTCAGGAGCTTTCTTATCCAGATCAGGACACCTTTCTG  
AACGCCGTGGCGCTATGTGGGAGCCGTCGGAGGCTTCTCTTTCATAGGCATCCAGCTCCTCTGCTGCTGGAGTTTGCACATAAGTGGAAACAAGAACTGGACAGCAGGCACA  
GCCAGTAAACAGCTGTGGTACGCCTCCCTGGCCCTGGTACGCTCATGATTTCCATTGGCAACTGCGAGGCTTGGTTTTGATGGCAGTTTTTATACAGAAAAGACGCTGTG  
GCATGGAAAAAAAATTTCTGCTGGGAGTAAATGGAGGCTATGCCTGCTTATTTTCATTGGTAGCCATCTCACCTGGTCCAAAATCGACAGCCACACTCGGGGCTCTTACA  
TCAGGGGTCATAAGCTGCTATGTACCCTACCTCACCTTCTCAGCTCTGTCCAGCAAACTGCAGAAGTAGTCTTAGATGAACATGGGAAAAATGTTACAATCTGTGTGCTCGA  
CTTTGGTCAAGACCTGTACAGAGATGAAAACCTGGTACTATACTGGGAAACAGCCTTAAATCGGATGTATCTTGTATTCAATGTTTGACATCAACCACAAGATCGAGTTCCGA  
CGCTCTGCAGGGGCGATACGACAGCTCCTGAATTTGGA-----  
ACACTGAAGAGCAGCAGCCGGGGAAGGAGGGACACGGGTCAATTTATGATGAGAAGAAAGGCACAGTCTACATCTACTCCTACTTCCACTTCGTGTTCTTCTAGCTTCCT  
GTATGTGATGATGACCGTCACCAACTGGTTCAAaagtctttccactcctgcatga

>rheMac3

ATGTACAGCTCAGTGTGTGCGGGCCAGCTGGCCCTGCTGCTGTGGGTCTGCAGGCTGCTCTCTCTGCTGTGATTGCTGCCCCAGGATTGGCAGTCCCTGAGCACCCGCTTC  
ATGTACGCCCTCTACTTCTCTGGTGTGCTGCTCTGCTGTCATCATGATGTCAACAACCGTGGCTCACAAGATGAAAGAGCACATTCCTTTTTTGAAGATATGTGTAAGGGC  
ATTAAGCTGGTGTACACCTGTGAGAAGCTGGTGGGATATTCTGCCGTGTATAGAGTGTGTTTTGAAATGGCTTGTCTCTTTTATCTCTGTCTACTGACCTTGAAATCAAC  
AACAGCAAAGTGTAGAGCTCATATTCACAATGGCTTTGGTCTTTAAACTTCTGCTGTTGGGGCCATGTGCTCAGGAGCTTTCTTATCCAGATCAGGACACCTTTCTG  
AACGCCGTGGCGCTATGTGGGAGCCGTCGGAGGCTTCTCTTTCATAGGCATCCAGCTCCTCTGCTGCTGGAGTTTGCACATAAGTGGAAACAAGAACTGGACAGCAGGCACA  
GCCAGTAAACAGCTGTGGTACGCCTCCCTGGCCCTGGTACACTCATGATTTCCATTGGCAACTGCGAGGCTTGGTTTTGATGGCAGTTTTTATACAGAAAAGACGCTGTG  
GCATGGAAAAAAAATTTCTGCTGGGAGTAAATGGAGGCTATGCGTGTATTTTCATTGGTAGCCATCTCGCCCTGTGTCACAAAATCGACAGCCGACCTCGGGGCTCTTACA  
ATCAGGGGTCATAAGCTGCTATGTACCCTACCTCACCTTCTCAGCTCTGTCCAGCAAACTGCAGAAGTAGTCTTAGATGAACATGGGAAAAATGTTACAATCTGTGTGCTCG  
ACTTGGTCAAGACCTGTACAGAGATGAAAACCTGGTACTATACTGGGACCAGCCTTAAATCGGATGTATCTTATTCATGTTTGACATCAACAACAAGATCGAGTTCCG  
ACGCTCTGCAGGGGCGATACGACAGCTCCTGAATGGAAATAGCCCGCTGTTGTTTTGCTTCACTGCTCGTGGAGAGGACACTGAAGAGCAGCAGCAGGGGGAAGGAGGGAC  
CCCGGTCAATTTATGACGAGAAGAAAGGCACCGTCTACATCTACTCCTACTTCCACTTCGTGTTCTTCTAGCTCCCTGTATGTGATGATGACCGTCACCAACTGGTTCAAaa  
gtgcccttgcctcctgcatga

gtgcccttgcctcctgcatga

SSH-iso2

>panPan1

ATGTCTGCTGCTGGCAGATGCTGCTGCTAGTCTCGTCTCCTCGTCTGGTATGCTCGGGACTGGCGTGCAGCCGGGCAGGGGTTCCGGGAAGAGGAGGCACCCCAA  
AAAGCTGACCCCTTTAGCCTACAAGCAGTTTTATCCCAATGTGGCCGAGAAAGACCCTAGGCGCCAGCGGAAAGGATGAAAGGGAAGATCTCCAGAAAACCTCGAGCGATTTAAG  
GAACCTACCCCAATTAACAACCCGACATCATATTTAAGGATGAAGAAAACCCGAGCGGACAGGCTGATGACTCAGAGGTTAAGGACAAGTTGAACCGCTTTGCCCATCT  
CGGTGATGAACCAAGTGTAGAGCTCATATTCACAATGGCTTTGGTCTTTAAACTTCTGCTGTTGGGGCCATGTGCTCAGGAGCTTTCTTATCCAGATCAGGACACCTTTCTA  
CACCAGCTGACCCGACCCGACGAAAGTACGGCATGCTGGCCCGCTGGCGGTGGAGCCGGCTTCGACTGGGTACTACGAGTCAAGGCACATATCCACTGCTCGG  
TGAAAGCAGAGAACCTGGTGGCGCCAAATCGGGAGGCTGCTCCCGGGCTCGGCCACGGTGCACCTGGAGCAGGGCGCACAAGCTGGTGAAGGACCTGAGCCCCGG  
GGACCGCTGCTGGCGCGGACGACGACGAGGGCCGGCTGCTCTACAGCAGCTTCTCCTACTTTTCCAGCCGACGACGCGCCAAGGCTTCTACGTGATCGAGACGCG  
GGGAGCCGCGGAGCGCTGCTGCTCACCGCCGCGACCTGCTTTTGGCGCCGACAAACGACTCGGCCACCGGGGAGCCGAAAGCGTCTCGGGCTCGGGCCCGC  
CTTCCGGGGGCGACTGGGCGCTCGGGCGTGTTCGCCAGCCGCTGCGCCCGGGCCAGCGGCTGACGTGTTGCTGCTGGCAGCGGTGACGGGGACCCCGGCTCTGCCC--

GGCCCCCTCCGCTGGCGCACGCGCTCCTGGCTGACTggcgccgogcgacagggaccgogcggggacagcggggggaccgogggggcgggcgogcAGAGTAGCCCTGCCCGCTCCAGG  
TGCTGCCGACGCTCCGGGTCGCGGGGCCACCGCGGGCATCCACTGGTACTCGCAGCTGCTTACCAAAATAGGCACCTGTGCTCCTGGACAGCGAGGCCCTGCACCCGCTG  
GGCATGGCGGTCAAGTCCAGCTGA

>rhIFox1

ATGTCTGCTGCTGGCAGATGCTGCTGCTAGTCTCGTCTCCTCGTCTGGTGTGCTCGGGACTGGCGTGCAGCCGGGCAGGGGTTCCGGGAAGAGGCGGCACCCCAA  
AAAGCTGACCCCTTTAGCCTACAAGCAGTTTTATCCCAATGTGGCTGAGAAGACCCTAGGCGCCAGCGGAAAGATGAAAGGGAAGATCTCCAGAAAACCTCGAGCGATTTAAG  
GAACCTACCCCAATTAACAACCCGACATCATATTTAAGGATGAAGAAAACCCGAGCGGACAGGCTGATGACTCAGAGGTTAAGGACAAGTTGAACCGCTTTGAGCCATTT  
CGGTGATGAACCAAGTGTAGAGCTCATATTCACAATGGCTTTGGTCTTTAAACTTCTGCTGTTGGGGCCATGTGCTCAGGAGCTTTCTTATCCAGATCAGGACACCTTTCTA  
CACCAGCTGACCCGACCCGACGAAAGTACGGCATGCTGGCCCGCTGGCGGTGGAGCCGGCTTCGACTGGGTACTACGAGTCAAGGCACATATCCACTGCTCGG  
TGAAAGCAGAGAACCTGGTGGCGCCAAATCGGGAGGCTGCTCCCGGGCTCGGCCACGGTGCACCTGGAGCAGGGCGCACAAGCTGGTGAAGGACCTGAGCCCCGG  
GGACCGCTGCTGGCGCGGACGACGACGAGGGCCGGCTGCTCTACAGCAGCTTCTCCTACTTTTCCAGCCGACGACGCGCCAAGGCTTCTACGTGATCGAGACGCG  
GGGAGCCGCGGAGCGCTGCTGCTCACCGCCGCGACCTGCTTTTGGCGCCGACAAACGACTCGGCCACCGGGGAGCCGAAAGCGTCTCGGGCTCGGGCCCGC  
CTTCCGGGGGCGACTGGGCGCTCGGGCGTGTTCGCCAGCCGCTGCGCCCGGGCCAGCGGCTGACGTGTTGCTGCTGGCAGCGGTGACGGGGACCCCGGCTCTGCCC--

CGGGAGCCGGCGGAGCGCTGCTGCTACCCGCCCGCACCTGCTCTCGTGGCGCGCACAACTGCTGCGCGCGGAGCCCGAGGCGTTCTCAGCGCGCTGGCCCG  
CTTCCGAGGGCGCACTGGGCGCTGGGGCGCTGTTCCGCCAGCCGGCGTGGCGGGCGCGCGAGCGTGTATGGTGGCCGAGCGCAACGGGGACCGGCGCTGGCCCG  
CCGCTGTACACAGCGTGACCTACGCGAGGAGGCCCGGGCGCTACGCGCGCTCACGGCCAGGGCACCATCTCATCAACCGGGTGTGGCTCGTGTACGCGCT  
CATCGAGGAGCAGGGTGGGCGCACCCGGGCTTCGCGCTTCGCGCTGGCGCAGCGCTCTGGCTGCATCGGGCCCGCGCTACGGACCCCGGGG  
-----GGTCACTGCCAGCTGA

>gorGor3

ATGCTGCTGCTGGCGAGATGTCTGCTGTAGTCTCCTCGTCTCCTCGTCTGGTATGCTCGGACTGGCGTGGGACCGGGCAGGGGGTTCCGGAAGAGGAGGCCACCCCAA  
AAAGCTGACCCCTTTAGCCTACAAGCAGTTATCCCCAATGTGGCCGAGAAGACCCTAGGCCACGCGGAAGGTACGAAGGGAAGATCTCCAGAACTCCGAGCGATTAA  
GGAACCTACCCCAATTACAACCCCGACATCATATTTAAGGATGAAGAAAACACCCGAGGGGACAGGCTGATGACTCAGAGGTGAAGGACAAGTTGAACGCTTTGGCCATC  
TCGGTGTAGAACCACTGGCCAGGAGTAACTGCGGGTACCCGAGGCGTGGACGAAAGATGCCCACCACTCAGAGGAGTCTCTGCATACGAGGGCCCGCGCAGTGGACAT  
CACCACGCTGACCCCGACCCGACGCAAGTACGGCATGCTGGCCCGCTGGCGGTGGAGGCCGGCTCGACTGGGTGACTACGAGTCCAAGGCACATATCCACTGCTCGG  
TGAAGCAGAGAAGCTCGGTGGCGCCAAATCGGGAGGCTGCTTCCGGGCTCGGCCACGGTGCACCTGGAGCAGGGCGGACCAAGCTGGTGAAGGACCTGAGCCCCGG  
GGACCGGCTGCTGGCGCGGACGACAGGGCCGGTGTCTACAGCGACTTCTCACTTTCTGGACCGGACGACGGCCGCAAGAAGGCTTCTACGTGATCGAGACGC  
GGGAGCCGCGGAGCGCTGCTGCTCCCGCGCGCATCTGCTCTTTGGCGCGCACAACTGCTCGCCACCGGGGAGCCGAGGGCGTCTCGGGCTCGGGGCGCG  
CTTCCGGGGCGCACTGGGCGCTGGGGCGTGTTCGCCAGCGCGCTGCCCGGGCGCGCTGACGCGCGCTGACGTGGTGGCCGAGCGTGACGGGGACCCCGGCTCTGCCCG  
CCGCTGTGACAGCGTACCCCTAAGCGAGGAGGCCCGCGGCCCTACGCGCGTACGCGCGGAGGGGACCCATTCTCATCAACCGGGTGTGGCTCGTGTACGCGGT  
CATCGAGGACACAGCTGGGCGCACCGGGCTTCCGCGCTGGCGCAGCGCTCTGGCTGACCTGGCGCCCGCGCGCACGGACCGgggggggggggggggggggg  
ggaccggggggggggggggggggggggAGAGTAGCCTGCCCCGCTCAGGTGCTGCCGAGCGCTCCGGGTGCGGGGGCACCCGGGGATCCACTGGTACTCGCAGCTCTACAAAATA  
GGCACCTGCTCTGACAGCGAGGCGCTGCACCCGCTGGGCATGGCGGTCAAAGTCCAGCTGA

>panTr04

ATGCTGCTGCTGGCGAGATGTCTGCTGTAGTCTCCTCGTCTCCTCGTCTGGTATGCTCGGACTGGCGTGGGACCGGGCAGGGGGTTCCGGAAGAGGAGGCCACCCCAA  
AAAGCTGACCCCTTTAGCCTACAAGCAGTTATCCCCAATGTGGCCGAGAAGACCCTAGGCCACGCGGAAGGTATGAAGGGAAGATCTCCAGAACTCCGAGCGATTAAAG  
GAACTACCCCAATTACAACCCCGACATCATATTTAAGGATGAAGAAAACACCGGAGCGGACAGGCTGATGACTCAGAGGTGAAGGACAAGTTGAACGCTTTGGCCATCT  
CGGTGATGAACCACTGGCCAGGAGTAACTGCGGGTACCCGAGGCGTGGACGAAAGATGCCCACCACTCAGAGGAGTCTCTGCATACGAGGGCCCGCGCAGTGGACAT  
CACCACGCTGACCCCGACCCGACGCAAGTACGGCATGCTGGCCCGCTGGCGGTGGAGGCCGGTTCGACTGGGTGACTACGAGTCCAAGGCACATATCCACTGCTCGG  
TGAAGCAGAGAAGCTCGGTGGCGCCAAATCGGGAGGCTGCTTCCGGGCTCGGCCACGGTGCACCTGGAGCAGGGCGGACCAAGCTGGTGAAGGACCTCCGCCCCGG  
AGACCGCGTGTGGCGCGGACGACAGGGCCGGTGTCTACAGCGACTTCTCACTTTCTGGACCGGACGACGGCCGCAAGAAGGCTTCTACGTGATCGAGACGC  
GGGAGCCGCGGAGCGCTGCTGCTACCGCCGCGCACCTGCTCTTTGGCGCGCACAACTGCTCGCCACCGGGGGCGCGAGGCGTCTCGGGCTCGGGGCCGCG  
CTTCCGGGGCGCACTGGGCGCTGGGGCGTGTTCGCCAGCGCGCTGCCCGGGCGCGCTGACGCGCGTGTACGTGGTGGCCGAGCGTGACGGGGACCCCGGCTCTGCCCG  
CGCGCTGTGACAGCGTGAACCCCTAAGCGAGGAGGCCCGCGGCCCTACGCGCGTACGCGCGGAGGGGACCCATTCTCATCAACCGGGTGTGGCTCGTGTACGCGGT  
CATCGAGGACACAGCTGGGCGCACCGGGCTTCCGCGCTGGCGCAGCGCTCTGGCTGACCTGGCGCCCGCGCGCACGGACCGgggggggggggggggggggggg  
ggaccggggggggggggggggggggggAGAGTAGCCTGCCCCGCTCAGGTGCTGCCGAGCGCTCCGGGTGCGGGGGCACCCGGGGATCCACTGGTACTCGCAGCTCTACAAAATA  
GGCACCTGCTCTGACAGCGAGGCGCTGCACCCGCTGGGCATGGCGGTCAAAGTCCAGCTGA

>calJac3

ATGCTGCTGCCGCGAGATGTCTGCTGTAGTCTCCTCGTCTCCTCGTCTGGTGTGCTCGGGCTGGCGTGGGACCGGGCAGGGGGTTCCGGAAGAGGCGGACCCCAA  
AAAGCTGACCCCTTTAGCCTACAAGCAGTTATCCCCAATGTGGCCGAGAAGACCCTAGGCCACGCGGAAGGTATGAAGGGAAGATCTCCAGAACTCCGAGCGATTAAAG  
GAACTACCCCAATTACAACCCCGACATCATATTTAAGGATGAAGAAAACACCGGAGCGGACAGGCTGATGACTCAGAGGTGAAGGACAAGTTGAACGCTTTGGCCATTT  
CGGTGATGAACCACTGGCCAGGAGTAACTGCGGGTACCCGAGGCGTGGACGAAAGATGCCCACCACTCAGAGGAGTCTCTGCATACGAGGGCCCGCGCAGTGGACAT  
TACCAGTCCGACCCCGACCCGACGCAAGTACGGCATGCTGGCCCGCTGGCGGTGGAGGCCGGTTCGACTGGGTGACTACGAGTCCAAGGCACATATCCACTGCTCGG  
TGAAGCAGAGAAGCTCGGTGGCGCCAAATCGGGAGGCTGCTTCCGGGCTCGGCCACGGTGCACCTGGAGCAGGGCGGACCAAGCTGGTGAAGGACCTCCGCCCCGG  
AGACCGCGTGTGGCGCGGACGACAGGGCCGGTGTCTACAGCGACTTCTCACTTTCTGGACCGGACGACGGCCGCAAGAAGGCTTCTACGTGATCGAGACGC  
GGGAGCCGCGGAGCGCTGCTGCTACCGCCGCGCACCTGCTCTTGGCGCGCACAACTGCTCGCCACCGGGGAGTCCGAGTGTGCTGAGGCGTGGGCGCGC  
TCCCGGGGACGCGTGGGGCGCGGGCGCTATTTGCCAGCCGCTGGCGCGGGCACGCGGTATACGTGGTGGCCGAGCGGATGGGAGCCGCGGCTCTGCGCTGC  
CGCGGTGACAGCGTGAACCCCTGCTCGAGGAGGCCACGGGCGCTTCCGCGCGTACGCGTCCAGGGACCTCTCTCATCAACCGGGTGTGGCTCTATGGTATG-  
GGTCACTCGAAGACACAGCTGGGCGCACCGGGGCTTTTGGCCCTTC-  
GCTGCGCACGCGCTCCTGGCTGCACTGCGCCCGCGCGCACGACCGgggggggagaccgggggggggggggggggggggggggggggggggggggggggggggCGAGTTCCCCCGCCCGCGCCAGGTGCG  
GCAAGCATCCGGGCGCGGGGCCACCCGGGCATCCACTGGTACTCGCAGCTGCTTACAAAATAGGCACGTGGCTCTGGACAGCGAGGCGCTGCACCCCTGGGCA  
TGGCGGCAAGTCCAGCTGA

>nasLar1

ATGCTGCTGCTGGCGAGATGTCTGCTGTAGTCTCCTCGTCTCCTCGTCTGGTGTGCTCGGACTGGCGTGGGACCGGGCAGGGGGTTCCGGAAGAGGCGGACCCCAA  
AAAGCTGACCCCTTTAGCCTACAAGCAGTTATCCCCAATGTGGCTGAGAAGACCCTAGGCCACGCGGAAGGTATGAAGGGAAGATCTCCAGAACTCCGAGAGATTAAAG  
GAACTACCCCAATTACAACCCCGACATCATATTTAAGGATGAAGAAAACACCGGAGCGGACAGGCTGATGACTCAGAGGTGAAGGACAAGTTGAACGCTTTGGCCATTT  
CGGTGATGAACCACTGGCCAGGAGTAACTGCGGGTACCCGAGGCGTGGACGAAAGATGCCCACCACTCAGAGGAGTCTCTGCATACGAGGGCCCGCGCAGTGGACAT  
CACCACGTCGACCCCGACCCGACGCAAGTACGGCATGCTGGCCCGCTGGCGGTGGAGGCCGGTTCGACTGGGTGACTACGAGTCCAAGGCACATATCCACTGCTCG  
GTGAAAGCAGAGAAGCTCGGTGGCGCCAAATCGGGAGGCTGCTTCCGGGCTCGGCCACTTCTCACTTTCTGGACCGGACGACGGCCGCAAGAAGGCTTCTACGTGATCGAGACGC  
GGGAGCCGCGTGTGGCGCGGACGACAGGGCCGGTACTTACAGCGACTTCTCACTTTCTGGACCGGACGACGGCCGCAAGAAGGCTTCTACGTGATCGAGACGC  
CGGAGCCGCGGAGCGCTGCTGCTACCGCCGCGCACCTGCTCTTGGCGCGCACAACTGCTCGCCACCGGGGAGTCCGAGTGTGCTGAGGCGTGGGCGCGC  
CTTCCGAGGGCGCACTGGGCGATCGGGCGTGTTCGCCAGCCGCTGGCGCGGGCCAGCGGTGTATGTGGTGGCCGAGCGCAACGGGGACCGCGGCTCTGCCCG  
CCGCTGTACACAGCGTGAACCCCTACGCGAGGAGGCCCGGGCGCGCTACGCGCGCTACGCGCGTACGCGCCAGGGGACCCATTCTCATCAACCGGGTGTGGCTCGTGTACGCGGT  
CATCGAAGGACACGGCTGGGCGCACCGGGCTTCCGCGCTTCCGCGCTGGCGCACGCGCTATTGGCTGCACTGGCGCCCGCGCGCACGACCGCGCGGCGGACGACCGG  
CGCGGGGACCGCGGGGGCGGCGGCGAGCCGAGTACCCCGCTGGCGCAGGTGGCGCCGACGCTACGGGTGCGGGGCCACCCGGGCATCCACTGGTACTCGCAGC  
TGCTTACAAAATAGGCACCTGGCTCTGACAGCGAGGCCCTGCACCCGCTGGGCATGGCGGTCAAGTCCAGCTGA

>chlSab2

ATGCTGCTGCTGGCGAGATGTCTGCTGTAGTCTCCTCGTCTCCTCGTCTGGTGTGCTCGGACTGGCGTGGGACCGGGCAGGGGGTTCCGGAAGAGGCGGACCCCAA  
AAAGCTGACCCCTTTAGCCTACAAGCAGTTATCCCCAATGTGGCTGAGAAGACCCTAGGCCACGCGGAAGGTATGAAGGGAAGATCTCCAGAACTCCGAGAGATTAAAG  
GAACTACCCCAATTACAACCCCGACATCATATTTAAGGATGAAGAAAACACCGGAGCGGACAGGCTGATGACTCAGAGGTGAAGGACAAGTTGAACGCTTTGGCCATTT  
CGGTGATGAACCACTGGCCAGGAGTAACTGCGGGTACCCGAGGCGTGGACGAAAGATGCCCACCACTCAGAGGAGTCTCTGCATACGAGGGCCCGCGCAGTGGACAT  
CACCACGTCGACCCCGACCCGACGCAAGTACGGCATGCTGGCCCGCTGGCGGTGGAGGCCGGTTCGACTGGGTGACTACGAGTCCAAGGCACATATCCACTGCTCG  
GTGAAAGCAGAGAAGCTCGGTGGCGCCAAATCGGGAGGCTGCTTCCGGGCTCGGCCACTTCTCACTTTCTGGACCGGACGACGGCCGCAAGAAGGCTTCTATGTGATCGAGACGC  
GGGAGCCGCGCGGAGCGCTGCTGCTACCGCCGCGCACCTGCTCTTGGCGCGCACAACTGCTCGCCACCGGGGAGTCCGAGTGTGCTGAGGCGTGGGCGCGC  
CCTTTCGAAGCGCACACTGGGCGATCGGGCGTGTTCGCCAGCCGCTGGCGCGGGCCAGCGGTGTATGTGGTGGCCGAGCGCAACGGGGACCGCGGCTCTGCCCG  
GCCGCTGTACACAGCGTGAACCCCTACGCGAGGAGGCCCGGGCGCTACGCGCGCTACGGCCAGGGGACCCATTCTCATCAACCGGGTGTGGCTCGTGTACGCGG  
TCTATCGAGGACGAGCTGGGCGCACCGGGCTTCCGCGCTTCCGCGTGGCGCACGCGCTTGGCTGCACTgggggggggggggggggggggggggggggggggggggggggggggCGAGTTCCCCCGCCCGCGCCAGGTGCG  
ggggggggggggggggggggggggAGAGTAGCCTGCCCCGCTCAGGTGCTGCCGAGCGCTCCGGGTGCGGGGGCACCCGGGGATCCACTGGTACTCGCAGCTGCTTACAAAATAGGCAC  
CTGGCTCTGGACAGCGAGGCGCTGCACCCGCTGGGCATGGCGGTCAAAGTCCAGCTGA

>saiBo1

ATGCTGCTGCTGGCGAGATGTCTGCTGTAGTCTCCTCGTCTCCTCGTCTGGTGTGCTCGGGCTGGCGTGGGACCGGGCAGGGGGTTCCGGAAGAGGCGGACCCCAA  
AAAGCTGACCCCTTTAGCCTACAAGCAGTTATCCCCAATGTGGCCGAGAAGACCCTAGGCCACGCGGAAGGTATGAAGGGAAGATCCAGAACTCCGAGAGATTAAAG  
GAACTACCCCAATTACAACCCCGACATCATATTTAAGGATGAAGAAAACACCGGAGCGGACAGGCTGATGACTCAGAGGTGAAGGACAAGTTGAACGCTTTGGCCATTT  
CGGTGATGAACCACTGGCCAGGAGTAACTGCGGGTACCCGAGGCGTGGACGAAAGATGCCCACCACTCAGAGGAGTCTCTGCATACGAGGGCCCGCGCAGTGGACAT  
CACCACGTCGACCCCGACCCGACGCAAGTACGGCATGCTGGCCCGCTGGCGGTGGAGGCCGGTTCGACTGGGTGACTACGAGTCCAAGGCACATATCCACTGCTCG  
GTGAAAGCAGAGAAGCTCGGTGGCGCCAAATCGGGAGGCTGCTTCCGGGCTCGGCCACTTCTCACTTTCTGGACCGGACGACGGCCGCAAGAAGGCTTCTATGTGATCGAGACGC  
GGGAGCCGCGCGGAGCGCTGCTGCTACCGCCGCGCACCTGCTCTTGGCGCGCACAACTGCTCGCCACCGGGGAGTCCGAGTGTGCTGAGGCGTGGGCGCGC  
CCTTTCGAAGCGCACACTGGGCGATCGGGCGTGTTCGCCAGCCGCTGGCGCGGGCCAGCGGTGTATGTGGTGGCCGAGCGCAACGGGGACCGCGGCTCTGCCCG  
GCCGCTGTACACAGCGTGAACCCCTACGCGAGGAGGCCCGGGCGCTACGCGCGCTACGGCCAGGGGACCCATTCTCATCAACCGGGTGTGGCTCGTGTACGCGG  
TCTATCGAGGACGAGCTGGGCGCACCGGGCTTCCGCGCTTCCGCGTGGCGCACGCGCTTGGCTGCACTgggggggggggggggggggggggggggggggggggggggggggggCGAGTTCCCCCGCCCGCGCCAGGTGCG  
ggggggggggggggggggggggggAGAGTAGCCTGCCCCGCTCAGGTGCTGCCGAGCGCTCCGGGTGCGGGGGCACCCGGGGATCCACTGGTACTCGCAGCTGCTTACAAAATAGGCAC  
CTGGCTCTGGACAGCGAGGCGCTGCACCCGCTGGGCATGGCGGTCAAAGTCCAGCTGA

>papAnu2







CAACTGAGAGTCTGGACTGGGAGGAGCAATGAGCTGCAGAACCTGGGAAGGAGGAGAAAGACATTCTGAAAAGCCTTACGAAGTCTGAAACGGAGATGGTGCGAC  
CAGACCACATGACATGAGAGAGCTCATCTCAGATCTGGAGCATCGGTGGCAGGGGTCATATGATGGAGCTGCTGCAGGGTGGATGGCATCTAAAGGGGTTGAGAACATG  
ACCTTGAAGAAGCCAAAAACATTTACAAAAATCAAAGGAGAGTGTTCGAGCTCTGATCTGAAAGGAATGCTAGACATGTTTAGAGAGCTAACAGATGTCCGACGCTACTG  
GGTGTGATGTGACACTGGCTCCAAACCAACATTTCCGATCTGTCATTTGCTGAAGATAAAGAGACAAAGTGAGCTATCAGAACCCACAGATAATGTATCAGTCACCGAGG-----  
GAAACCTCAGAAATTTCAATATTGTTACTGGCTCCTGGGCTCCCAAAAGTATACATCAGGGAAACATTAAGGGAGGTAGATGTCCAAAGAAAAGTCTGGATCTGGATCTGGGG  
GTATGTGCTGGCTCCAAACCCGATGCAACAGTATAAATGAAACAAAAGAAAATTAACAACCTAAATAGGCTACTGGGTTATAGGGTTACAGAGAAAGGATAAATATAGTCTT  
TTCCAGGATGGTTCCTACATCTCCTTTTCCCTTTCAATTTGTCGCCCCTCTGTGATTAATTTTCTGCTGATCGTGTGGAGTTTTCGTAGACTATGAAATGACATGTCTCAT  
TCTTCAATATCACAACCATGGATTTCTCATCTATAAGTTTTCTCAGTGTCTTTTTCTAAGCCTGTATTTCCATATTTAAATCCCAGAAAATGTACAGTCCCAGTACTGTGTC  
TCACCAAGCTCTTGA

>saiBoli

ATGGCTTCAGAAATCCTGGGGAGTATAAAGGAGGAGGTGACCTGCCCATCTGCCTGGAACCTCTGACAGAACCTCTGAGCCTAGACTGTGGCCACAGCTTCTGCCAAGCA  
TGCATCACTGCAAAATCACAAGAGTCTATGCTACACCAAGGAGAGAGAAGCTGCCCTTTGTGCCGGCTCCCTTACCAGTCTGAGAACCTGCGGCTTAATCGGCATTTGGCCA  
GCATCGTGGAGAGGCTCAGGGAGGTGATGCTGAGACCAGAGGGGCGAGAACCTGTTGATCACTGTGCACGCCATGGAGAGAAACTTCTACTCTTCTGTGAGCAGGATGGAATA  
TCATTTGCTGGCTTTGTGAGCGGTCTCAAGAACCCGTGGTCAACAACATTTCTCGTGGAGGATTTGCACAGAAAATACCGAGAAAAGCTCCAGGTAGCTCTGGAGACAA  
GAGGCAGAAAGCAGCAGGATGCTGAAAAGCTTGGAAAGCTGACGTGACAGCAAGGAGATTCACATCAGGGAAACATTAAGGAGATTCAAATCAAAATGACAAAAGTCTGGATCTAAAG  
CAACTGAGAGACATCTGGACTGTGAGGAGCAATGAGCTGCAAAACCTGGAGAGAGGAGGAGAAAACATTTCTGAAAAGACTTGTACAGTGTGAAAATGACATGGTGGCTGC  
AGACCCAGTCCGTGAGAGTGTCTATCTCAGATCTGAGCGTGCCTGCAAGCTGAGGGTCAAGTGGAGTGTTCACAGGATGTGGATGGTCTAAAGAAAGTGTGAGAAAGTGA  
CTTTGCGAAGCCAAAACCTTCTTAAATGAAAAGGAGAGTATTTGAGCTCTGATCTGAAAAGAATGCTCCAAGTGTAAAAGAACTGACAGAACTCAACGCTACTGG  
GCTCATGTGACACTGGTCCAAAGTACCCTTCATATCTATCATTCTGAAAGATGGGAGACAAAGTGGATATCAGAAAACCT-----ATAC---  
ATGCACTACTTGTGAAGCTTCAATATTTTATGGCTCCTGGCTCCCAAGTTCACATCAGGAAACATTAAGTGGAGGTAGACGTGTCCAAT---ATAC---  
GGGGTATGTTAGCTGAAATGACTGCAAAATCAGAGGTGTTTCAGGAACTGAAAATTAACAACCTAAATAGGCTACTGGGTTATAGGGTTACGGAAATGACGGATCACTATAG  
GGCTTTCCAGGCTGGTTCGGGCTTCTTCCCTCTTCCCTCTTGTGCTGCCCTCTTATGACTATTTTCCCTAATCGGGTCCGGGTTTCTAGACTATGAGGCTCGCACT  
CTCATTTCTCAATGTCACAAGCAATGGATTTCTCATCTACAAGTTTTCTGACTGTCAATTTCTTATCCTGTATTTCCATATTTCAATCCTATGACGTGTGAATACCCATGACT  
TGTGCTCAACCAAGGCTTGA

>papAnu2

ATGGCTTCTGGAATCCTGCTTAATGTAAGGAGGAGGTGACCTGCCCATCTGCCATctgctggaactctcagAACCCCTGAGTCTGCCCTGCGGCCACAGCTTCTGCCAAGCGTGCATCA  
CTGCAAAACCCACAGAAAGTCTGCTATtacaagaagagagagaagctGCCCTGTGTGCCGGATCAGTTACCAGCATACAGCCATACCGCCATGAGCCAACTAGTGGAGA  
AGCTCAGGGAGGTCAAGTTGAGCCAGAAGGGCAGAAGGTTGATCACTGTGCACGCCATGGAGAGAAAACCTCTACTCTTCTGTGAGGAGACAGCAAGGTCATTTGCTGGC  
TTTGTGAGCGGTCTCAGGAGCACCGTGGTCAACACATTTCTCATGGAGGAGGTGGCCAGGAGTACCATGTGAAGCTCCAGACAGCTCTggagatgctgagcagaagcagcAGGA  
AGCTGAAAAGTTGGAAGCTGacatcagagaagagaagctCCTGGAAGATTTCAAATGACATACAGGAAACCAACCTCTCCGGCAGATTTTGGCAACTGAGGAGATCTGGACTGG  
GAGGAGAGCAATGAGCTGCAAGAACctgcaagagaaggaagagaacatTCTGAAAAGCTTACGAAGTCTGAAAACCGGAGATGGTGCAGCAGACCCAGTACATGAGAGACTCATCTCA  
GATCTGGAGCATCGGTCTCAGGGCTCAATGATGGAGCTACTGCAGGTGTGGAGCTATTAAGGAGATTGAGAAGCAGCCCTTGAAGAAGCAACAGCTTTTCCAAAA  
TCAAAGGAGAGTGTTCGAGCTCTGATCTGAAAAGGATGCTACACATGTTAGAGagcTAACAGATGTCGACGCTACTGGTGTGATGTGACTGGCTCCAACACACTTC  
GCATGCTGTATTGCTGAAGATAAGAGACAAGTGAAGCTCTCGGAACCCACAGATAACGATACAGGCACCAGGGACATTTATTTCCGCTCACTCAGAAATTTCAATATTTGACTG  
CGCTCCTGGGCTCCCAAGTATCACATCAGGGAAGCATTACTGGAGGTAGATGTGTCAAGAAAAGTGTCTGGATCCTGGGGGATGTGCTGGCTTCCAAACCAATGCAAT  
GATAAAtattgaacaaaatgaaatattcaaaCTAAATAGGCTACTGGGTTATAGGTTACAGGAAGGAGTAAATATAGTGTTCAGGATGTGCTTCCACATCTCCTTTTGTCTCTT  
TCTTGTGCCCTCTCTGTGATTTATTTGCTGATCTGTGGAGTTTTCTGACTATAGAGCTTGCACGTGCTCAATCTTCCATATCACAACCATGGATTTCTCATCTATAA  
GTTTTCTCAGTGTCTTTTCTAAGCCTGTATTTCCATATTTAAATCCCAGAAAATGTACAGTCCCAGTACTGTGCTCAACAGCTCTGA

>hg38

ATGGCTTCTGGAATCCTGGTTAATGTAAGGAGGAGGTGACCTGCCCATCTGCCTGGAACCTCTGACACAACCCCTGAGCCTGGACTGCGGCCACAGCTTCTGCCAAGCAT  
GCCCTACTGCAAAACCCACAGAAAGTCCATGCTAGACAAAAGGAGAGAGTACTGCCCTGTGTGCCGGATCAGTTACCAGCCTGAGAACAATACGGCTTCAATCGGCATGTAGCCAA  
CATAGTGGAGAAGCTCAGGGAGGTCAAAGTTGAGCCAGAGGGGCGAGAAGTGTATGATCTGACGCCATGGAGAGAAAACCTCTACTCTTCTGTCAAGGAGACGGGAAGGT  
CATTTGCTGGCTTTGTGAGCGGTCTCAGGAGCACCGTGGTCAACACACTTTCTCATGGAGGAGGTTGCCGGGAGTACCAAGTGAAGCTCCAGGCAGCTCTGGAGATGCT  
GAGGCAGAAGCAGCAGGAAGCTGAAAGTTAGAAAGCTGACATCAGAGAAGAGAAAGCTTCTGGAAGACTCAAATACAGTATGACAAAACCAACAGCTTGGCAGATTTGAG  
CAACTGAGAGAGATCTGGACTGGGAGGAGCAATGAGCTGCAAAAACCTGGAGAAGGAGGAGACATTTGAAAAGCTTACGAAACTCTGAAAACCTGAGATGGTGCAG  
CAGACCCAGTCCCTGAGAGAGCTCATCTCAGATCTGAGCATTGCGCTCAGGGGTCAAGTGTGGAGCTGCTCAGGGTGTGGATGGCCTATAAAAAGGAGCCGAGCAACGCTG  
ACCTTGAAGAAGCCAGAAACTTTTCCAAAAATCAAAGGAGAGTGTTCGAGCTCCTGATCTGAAAAGGAAATGCTAGAAGTGTTAGAGAGCTGACACAGATGTCGACGCTCTG  
GGTGTGATGTGACAGTGGCTCCAACAACATTTCAATGTGCTGTCAATTTCTGAAGATAAAGAGACAAGTGAAGTCTCCGAAACCCACAGATAATATATGGGGCACGAGGACAAGAT  
ACCAGACATTTGTGAATTTCAATTTATTTGACTGGCATCCTGGGCTCCTCAAAGTATCACATCAGGGAAACATTAAGTGGAGGTAGACGTTGTCGAAGAAAAGTGTGGATCTGT  
GGGGTATGTGCTGGCTTCCAAACCCGATGCAATGTATAATTTGAAAACCAATGAAAATTAACAACCTAAATACGGCTACTGGGTTATAGGGTTAGAGGAAAGGATTAATATAGT  
GCTTTCCAGGATAGTTCCTCCATCTCCTTCTGTCTTTCATTTGTGCCCTCTCTGTGATTTATTTGCTGATCGTGTGGAGTTTTCTGACTATGAGGCTTGCACGTGCT  
CATTTCTCAATATCACAACCATGGATTTCTCATCTATAAGTTTTCTCAGTGTCTTTTTCTCAGCCTGTATTTCCATATTTAAATCCCAGAAAATGTGAGTCCCAGTACTGTG  
TGCTCAACCAAGCTCTGA

>macFas5

ATGGCTTCTGGAATCCTGCTTAATGTAAGGAGGAGGTGACCTGCCCATCTGCCTGGAACCTCTGACACAACCCCTGAGTCTGACTGCGGCCACAGCTTCTGCCAAGCGT  
GCATCACTGCAAAACCCACAGAAAGTCCATGCTATACAAGGAGAGAGAAGTGCCCTGTGTGCCGGATCAGTTACCAGCCTGAGAACAATACGGCTTCAATCGGCATGTAGCCAA  
CATAGTGGAGAAGCTCAGGGAGGTCAAAGTTGAGCCAGAGGGGCGAGAAGTGTATGATCTGACGCCATGGAGAGAAAACCTCTACTCTTCTGTCAAGGAGACGGGAAGGT  
CATTTGCTGGCTTTGTGAGCGGTCTCAGGAGCACCGTGGTCAACACACTTTCTCATGGAGGAGGTTGCCGGGAGTACCAAGTGAAGCTCCAGGCAGCTCTGGAGATGCT  
GAGGCAGAAGCAGCAGGAAGCTGAAAAGTTGGAAGCTGACATCAGAGAAGAGAAAGCTTCTGGAAGACTCAAATAGACCACGACAAAACCAACAGCTTGGCAGATTTGAG  
CAACTGAGAGAGATCTGGACTGGGAGGAGCAATGAGCTGCAAAAACCTGGAGAAGGAGGAGACATTTGAAAAGCTTACGAAACTCTGAAAACCTGAGATGGTGCAG  
CAGACCCAGTACGAGAGAGCTCATCTCAGATCTGAGCATTGCGCTCAGGGGTCAAGTGTGGAGCTGCTCAGGGTGTGGATGGCCTATAAAAAGGATTTGAGAACATG  
ACCTTGAAGAAGCCAGAAACTTTTCCAAAAATCAAAGGAGAGTGTTCGAGCTCCTGATCTGAAAAGGAAATGCTAGAAGTGTTAGAGAGCTGACACAGATGTCGACGCTCTG  
GGTGTGATGTGACAGTGGCTCCAACAACATTTCAATGTGCTGTCAATTTCTGAAGATAAAGAGACAAGTGAAGTCTCCGAAACCCACAGATAATATATGGGGCACGAGGACAAGAT  
TTCAGTCACTCAGAAATTTCAATTTATTTGACTGGCATCCTGGGCTCCTCAAAGTATCACATCAGGGAAACATTAAGTGGAGGTAGATGTGTCGAAGAAAAGTGTGGATCTGT  
GGGGTATGTGCTGGCTTCCAAACCCGATGCAATGTATAATTTGAAAACCAATGAAAATTAACAACCTAAATACGGCTACTGGGTTATAGGGTTAGAGGAAAGGATTAATATAGT  
GTTTTCCAGGATAGTTCCTCCATCTCCTTCTGTCTTTCATTTGTGCCCTCTCTGTGATTTATTTGCTGATCGTGTGGAGTTTTCTGACTATGAGGCTTGCACGTGCT  
CATTTCTCAATATCACAACCATGGATTTCTCATCTATAAGTTTTCTCAGTGTCTTTTTCTCAGCCTGTATTTCCATATTTAAATCCCAGAAAATGTGAGTCCCAGTACTGTG  
TGCTCAACCAAGCTCTGA

>nomLeu3

ATGGCTTCTGGAATCCTGGTTAATGTAAGGAGGAGGTGACCTGCCCATCTGCCTGGAACCTCTGACACAACCCCTGAGTCTGACTGCGGCCACAGCTTCTGCCAAGCAT  
GCCCTACTGCAAAACCCACAGAAAGTCCATGCTAGACAAAAGGAGAGAGAAGTGCCCTGTGTGCCGGATCAGTTACCAGCATAAAGAACTACAGCC-  
TAATCGGCATGTAGCTAACATGTGGAGAGCTCAGGAGGTCAAAGTTGACCTGTGACCGCAAGGGGCGAGAAGTGTGATCACTGTGACGCCATGGAGAGAAAACCTCTACTCTTGT  
CGGGAGGACAGGAAGGTCATTTGCTGGCTTTGTGAGCGGTCTCAGGAGCACCGTGGTCAACACACTTTCTCAGGAGGAGGTTGCCAGGAGTACCAATGAAGCTCCAG  
GCAGCTCTGcagatgctgagcagaagcagcagaagctgaagAGTTGGAAGCTGACATCAGAGAAGAGAAAGCTTCTGGAAGACTCAAATACAGTATGACAAAACCAACATTTGGCAG  
ATTTTGGCAACTGAGACACATCTGGACTGGGAGAGCAATGAGCTGCAAAAACCTGGAGAAGGAGGAGAAAACGCTTCTGAAAAGGCTTATGAAGTCTGAAAATTTGAGAT  
GGTGCAGCAGCCAGTCCGAGAGAGCTCATCTCAGATCTGAGCATTGCGCTCAGGGGTCAAGTGTGGAGCTGCTCAGGGTGTGGATGGCCTATAAAAAGGATTTGAGAACATG  
GATGAAGAAGCTGACCTTCCAAAGCCAGAAAACCTTTCCAAAAATCAAAGGAGAGTGTTCGAGCTCCTGATCTGAAAAGGAAATGCTAGAAGTGTTAGAGAGCTGAGAGATG  
TCCAACACTACTGGGTTGATGTGACAGTGGCTCCAACAACATTTCAATATGCTGTCAATTTCTGAAGATAAAGAGACAAGTGAAGTCTCCGAAACCCACAGATAATATATGAGGCA  
CAAGGGACAATATCTCAGACATTTGGAATTTCAATTTATTTGACTGGCATCCTGGGCTCCTCAAAGTATCACATCAGGGAAACATTAAGTGGAGGTAGAGCTGTCCAAGAAAAG  
TGCTTGGATCCTGGGGGTTATGTGCTGGCTTGCACCTGATGCAATGTATAATTTGAACAAAATGAAAATTAACAACCTAAATACGGCTACTGGGTTATAGGGTTAGAGGAAAGGATTAATATAGT  
GAGTAAATGTAATGCTTTCCAGGATGGTTCCTCAGATCTCCTTCTGCTCCTTTCATTTGTGCCCTCTCTGTGATTTATTTGCTGATCGTGTGGAGTTTTCTGACTATGAGGCTTGCACGTGCT  
GGCTTGCACCTCTCAATTTCAATATCACAACCATGGATTTCTCATCTATAAGTTTTCTCAGTGTCTTTTTCTAAGCCTGTATTTCCATATTTAAATCCCAGAAAATGTACAGTCCCAGTACTGTG  
TCCCAGTACTGTGCTCAACCAAGCTCTGA

>ponAbe2

ATGGCTTCTGGAATCCTGGTTAATGTAAGGAGGAGGTGACCTGCCCATCTGCCTGGAACCTCTGACACAACCCCTGAGTCTGACTGCGGCCACAGCTTCTGCCAAGCAT  
GCCCTACTGCAAAACCCACAGAAAGTCCATGCTAGACAAAAGGAGAGAGAAGTGCCCTGTGTGCCGGATCAGTTACCAGCATAAAGAACTACAGCC-  
ACATAGTGGAGAAGCTCAGGGAGGTCAAATTTGAGCCAGAGGGGCGAGAAGTGTGATCACTGTGACGCCATGGAGAGAAAACCTCTACTCTTCTGTAAGGAGGACGGGAAGG  
TCATTTGCTGGCTTTGTGAGCGGTCTCAGGAGCACCGTGGTCAACACACTTTCTCAGGAGGAGGTTGCCAGAAAGTACCAAGTGAAGCTCCAGGCAGCTCTGGAGATGC  
TGAGGCAGAAGCAGCAGGAAGCTGAAAGGTGGAAAGCTGACATCAGAGAAGAGAAAGCTTCTGGAAGACTCAAATACAGTATGACAAAACCCAGGCTTGGCAGATTTTGA



TGCATCCCCGCTGGCCTCGACCTCTCCAATGGCCACCTGGACACCTTCCGCTCTCTAGCTCGATTCTGGGAGCAGTCAGCCCCACTGGGCCCCGGTCTACCCC  
AGGGCCCCGTATGACGATGAGGAGGAGGGGCACCCACCCAGGCTGAAGTGCCATGGAGTCTCTTAA

>calJac3

ATGGGAAGCCCCGAGGATGACCTGATTGGGATTCATTCCCGGACCACAGCAGTGAGCTCCTGAGCTGCCTAATGAGCAGCGCCAGCTGGGCCACCTATGTGACCTCAC  
ATTCCGACCCAGGGCCTTGAATACCCGACCCACAGGGCTGTGCTAGCTGCCTGTAGCCACTCTTCAAGAAGCTTTCACTGAGGGCCGGTGGCGGAGCGTGCATGGGAGCC  
GGGGCCGGCGGACAGCTGTGGGGGAGCAGGGGCGGGCGTGTGTGAGCTGGACTTTGTAGGGCCAGAGGCACTAGGCGCCCTCTTGAATTCGCCTATACAGCCCACT  
TGACCACAGCAGCGCAACATGACCAGTGTACTCCAGGCTGCCGGCTGTGGAGACTCCCGTGTGTCATCGCTGCTTGCATGGAGATTTGCATCGTTAGAGCTAGAA  
CTCCAGCCCGGACGAGGATGACTGTGAGAGAGCCCGCCAGTATCTGGAGGCCTTTGCCACAGCCACGGCCTCTGGAGTTCCCAATGGTGAAGACAGTCTCCACAGGTG  
CCCTCCACACCTCCACACCGCCACCTCGGCCCTGTTCGCCCGCCGACGGCCGAAAGCCCGAAAGCTTTCTGCAAAACCAAGGGGGCCAGAGCAAACCACCTAGTCCCT  
GAGGTGCCACAGTGCCACCCATCCCTTGCCTATGAGGAGGAGGAGGGCGGGCAGAGTGGCAGCAGTGGGGCAGTGGGGCAGTTCACAGCCCTCCCA  
CAGGAACCCGCTCCCTCCTGAGGGTCCAGAGCTACGAGGCTATGAGGGTGAAGGAGGAGGAGGAGTGGTATATCCCCCGCCCTATGGGCTGGCGCAGGGGG  
CGGGCCCCGCTGTCCCAAGAGGAGCTGGGCTCAGATGAGGATGCCATCGATGCTGACCTGATGGCCCTACTAAGCTCCCTGCCAACAGGACAACCTGGCACCCAGGCTGG  
ACAGGCAAGACAAGCTGGTGGCAACCGCGCTCCAGATGCTCAGGAGTGCCTGTCTGCCACAAGATCATCCAGGGGGTGGTAACTGCTCGCCACATGAGGACCC  
ACACAGGCGAGAAGCCCTTTGCTGCGAGGCTGCGGGCTTTCGATTACCCCGGAATGACAAGCTGAAGATCCACATGCGGAAGCACACAGGAGAGCGCCCTACTCTGCC  
CGCACTGCCAGCCGCTTCTCGACAGCTATGACCTCAAGAACCACATGACCTGCACACGGGGACCGGCCCTATGAGTGCCACTGTGCCAAGGCTTTGCGCAAGG  
AGGACACCTGACGCGCCACTCAAGGGCCAGAACTGCCTGGAGTTTCGACCCGACGGCCGGAAGGAGGACGATGCACCACCCCACTACCCGCCACCCCTACTCCGCTGCT  
GATCCCCCGAGGCTCGACCTTCCAAATGGCCACTGGACCTTCCGCTCTCTAGCTGCCTGATTCGGGAGCAGTCAGCCCCACTGGGCCCCGGTCTACTCCCCG  
GGCCCCGCTGATGACGATGAGGAGGAGGGGCACCCACCCACCCAGGCTGAAGTGCTATGGAGTCTCTTAA

>nasLar1

ATGGGGAGCCCCGAGGATGACCTGATTGGGATTCATTCCCGGACCACAGCAGTGAGCTCCTGAGCTGCCTCAATGAGCAGCGCCAGCTGGGCCACCTATGTGACCTCAC  
ATCCGACCCAGGGCCTTGAATACCCGACCCACAGGGCTGTGCTAGCTGCCTGTAGCCACTCTTCAAGAAGCTATTCACTGAGGGCCGGTGGCGGAGCTGCATAGGGGGCT  
GGGGGACGGCGGACGAGCTGGGGGAGCAGGGGACGGCGTGTGTGAGCTGGACTTTGTAGGGCCAGAGGCACTAGGCGCCCTCTTGAATTTGCCTATACAGCCCACT  
TGACCACAGCAGCGCAACATGCCAGCTGTGCTCCAGGCTGCCCGCTGCTGGAGATCCCGTGTGTCATCGCTGCTTGCATGGAGATTTGCAGGGCAGTGGGCTAGAAG  
CTCCAGCCCGACGAGGA

GCCGACGGCAAGCCCGAAAGCTTTCTGCAAAACCAAGGGGGCCAGAGCAAACCACCTAGTCCCTGAGGTTGCCCGCATACCCGCCCTCCCTTGACCTATGAGGAG  
GAGGAGTGGCGGTAGAGTGGCGACGAGTGGGGCAGTGGGCTGGGGACAGCTCAGCCGCTCCACAGGAACCGCCCTCCCTCCTGAGGGGGCCAGAGCTACGAA  
CCCTATGAGGGTGAAGAGGAGGAGGAGGCTGGTATATCCCGACCTATGGCTGTGCCAGGTTGGCGGGCCCGCTGTCCCAAGAGGAGCTGGCCTCAGATGAGG  
ATGCCATCGATCCTGATGATGGCTACCTAAGCTCCCTGCACCAGGACACCTGGCACCAGGCTGGACGGCAAGACAAGCTGGTGGCAACCGCGCTCCAGATGC  
CTCAGGAGTGTCTGTGCCA

>chiSab2

ATGGGGAGCCCCGAGGATGACCTGATTGGGATTCATTCCCGGACCACAGCAGTGAGCTCCTGAGCTGCCTCAATGAGCAGCGCCAGCTGGGCCACCTATGTGACCTCAC  
ATCCGACCCAGGGCCTTGAATACCCGACCCACAGGGCTGTGCTAGCTGCCTGTAGCCACTCTTCAAGAAGCTTTCACTGAGGGCCGGTGGCGGAGCTGTACGGGGC  
CGGGGGCAGCGGGACAGCCGCTGGGGGAGCAGGAGCAGGGCTGTGTGAGCTGGACTTTGTAGGGCCAGAGGCACTAGGCGCCCTCTTGAATTTGCCTATACAGCCACA  
CTGACACCAGCAGCGCCAAACATGCCAGCTGTGCTGCAGGCTGCCCGCTGCTGGAGATCCCGTGTGTCATCGCTGCTTGCATGGAGATTTGCAGGGCAGTGGGCTAGAA  
GCTCCAGCCAGCAGGAGGATGACTGTGAGCGAGCCCGCCAGTATCTGCAGGCCCTTTGCCACAGCCACAGCTTCTGGAGTTCCCAATGGTGAAGACAGCTCCACAGGTT  
CCCTCCcaccacacccaccccgccactTCCGCTGTGCCCGCCGAGCCGCAAGCCCGGAAGCTTTCTGCAAAACCAAGGGGGCCAGAGCAAAACCACTAGTCCCTGAGGTTG  
CCACAGTACCTTGCCTTGCACAGCTACGACCTAAGAACCACATGACCTGCATGAGGAGGAGGAGTGTGAGTGTGAGGAGTGGGGCAGTGGGCTGGGGCAGTGGGCTGGG  
CCGCTCCCTCCTGAGGGGGCCAGAGCTACGAACCCCTATGAGGGTGAAGGAGGAGGAGGAGTGGTATATCCCCAGCCTATGGGCTGGCGCAGGGTGGCGGGCC  
CCCGTGTCCCGAGGAGCTGGGCTCAGATGAGGATGCCATCGATCTGACCTGATGGCTACCTAAGCTCCCTGCACCAGGACAACCTGGCACCAGGCTGGACCGCC  
AAGACAAGCTGTGTGCCAAACCGCCCTCCAGATGCCATGAGGAGTGTCTGTGCCACAAGATCATCCATGGGGCGGGCAAACTCCCTGGCCACATGAGGACCCACAG  
GGGAAAGCCCTTTGCTGCGAGGTCTGGGTTTCGATTACCCCGAAGCAGCAAGCTGAAGATCCACATGCGGAAGCACAGGGAGAGCGCCCTACTCGTGGCCGAC  
TGCCAGCCCGCTTCCCTGACAGCTACGACCTCAAGAACCACATGACCTGCATGAGGAGGAGGAGGAGTGGGCTGGGGCAGTGGGCTGGGGCAGTGGGCTGGG  
CACCTGCAGCGCCACTCAAGGCCAGAAGTGCCTGGAGTGGCGACCCGACGGCGCCGAAGGACGATGCACCACCCCACTACCCGCCACCCCTACTCGGCTGTGCATC  
CCCCGTGGCTTGCCTTCCAAATGGCCACCTGGACACCTTCCGCTCTCTAGCTGCCTTCTGGGAGCAGTCAGCCCCACCGGGCCCGGGTCTACTCCCCGGGGC  
CCCTGATGACGATGAGGAGGAGGGGCACCCACCCACCCAGGCTGAAGTGCCATGGAGTCTCTTAA

>salB01

ATGGGGAGCCCCGAGGATGACCTGATTGGGATTCATTCCCGGACCACAGCAGTGAGCTCCTGAGCTGCCTCAATGAGCAGCGCCAGCTGGGCCACCTATGTGACCTCAC  
ATCCGACCCAGGGCCTTGAATACCCGACCCACAGGGCTGTGTTAGCTGCCTGTAGCCACTCTTCAAGAAGCTTTCACTGAGGGTGGCGGAGCGGCTCATGGGAGC  
CGGGGGCGGGGACCGCTGTGGGGGAGCAGGGGCGGGCTGTGTGAGCTGGACTTTGTAGGGCCAGAGGCACTAGGCGCCCTCTTGAATTTGCCTATACAGCCACT  
TGACACCAGCAGCGCCAAACATGCCCTGTGCTCAGGCTGCCCGCTGTGGAGATCCCGTGTGTCATCGCTGCTTGCATGGAGATTTGCAGGATTTGCGGAGTGGGCTAGAA  
GCTCCAGCCCGGACGAGGATGACTGTGAGAGCGCCCGCCAGTATCTGGAGGCTTTGCCACAGCCACGGCCTCTGGAGTTCCCAATGGTGAAGACAGCCCTCCACAGT  
GCCCTCCcaccacacccaccccgccactTCCGCTGTGCCCGCCGAGCCGCAAGCCCGGAAGCTTTCTGCAAAACCAAGGGGGCCAGAGCAAAACCACTAGTCCCTGAGGTTG  
CCACAGTACCTTGCCTTGCACAGCTACGACCTAAGAACCACATGACCTGCATGAGGAGGAGGAGTGGCGGGCAGAGTGGGCGCAGTGGGGCAGTGGGCTGGGGGACAGTTACAGCCCTC  
CCGAGTGGCCGACGGGCCCCACTCCCTTGAGGGTCCAGAGCTACGAGGCTATGAGGGTGAAGGAGGAGGAGGAGTGGTATATCCCCCGGCTATGGGCTGGCGCAGGG  
GGCGGGCCCGCTGTCCCGAGGAGGAGTGGGCTCAGATGAGGATGCCATCGATCCTGACCTGATGGCCCTTGGCCACAAGATCATCCATGGGGCGGGCAAACTCCCTGGCCACATGAGGACCCACAG  
GGGAAAGCCCTTTGCTGCGAGGTCTGGGTTTCGATTACCCCGAAGCAGCAAGCTGAAGATCCACATGCGGAAGCACAGGGAGAGCGCCCTACTCGTGGCCGAC  
TGCCAGCCCGCTTCCCTGACAGCTACGACCTCAAGAACCACATGACCTGCATGAGGAGGAGGAGTGGGCTGGGGCAGTGGGCTGGGGCAGTGGGCTGGGGCAGTGGGCTGGG  
CACCTGCAGCGCCACTCAAGGCCAGAAGTGCCTGGAGTGGCGACCCGACGGCGCCGAAGGACGATGCACCACCCCACTACCCGCCACCCCTACTCGGCTGTGCATC  
CCCCGTGGCTTGCCTTCCAAATGGCCACCTGGACACCTTCCGCTCTCTAGCTGCCTTCTGGGAGCAGTCAGCCCCACCGGGCCCGGGTCTACTCCCCGGGGC  
CCCTGATGACGATGAGGAGGAGGGGCACCCACCCACCCAGGCTGAAGTGCCATGGAGTCTCTTAA

>papAnu2

ATGGGGAGCCCCGAGGATGACCTGATTGGGATTCATTCCCGGACCACAGCAGTGAGCTCCTGAGCTGCCTCAATGAGCAGCGCCAGCTGGGCCACCTATGTGACCTCAC  
ATCCGACCCAGGGCCTTGAATACCCGACCCACAGGGCTGTGCTAGCTGCCTGTAGCCACTCTTCAAGAAGCTTTCACTGAGGGTGGCGGAGCGGCTCATGGGAGC  
CGGGGGCAGCGGGACAGCCGCTGGGGGAGCAGGAGCAGGTTGTGTGAGCTGGACTTTGTAGGGCCAGAGGCACTAGGCGCCCTCTTGAATTTGCCTATACAGCCCACT  
TGACACCAGCAGCGCCAAACATGCCCTGTGCTCAGGCTGCCCGCTGTGGAGATCCCGTGTGTCATCGCTGCTTGCATGGAGATTTGCAGGATTTGCGGAGTGGGCTAGAA  
GCTCCAGCCCGGACGAGGATGACTGTGAGAGCGCCCGCCAGTATCTGGAGGCTTTGCCACAGCCACGGCCTCTGGAGTTCCCAATGGTGAAGACAGCCCTCCACAGT  
GCCCTCCcaccacacccaccccgccactTCCGCTGTGCCCGCCGAGCCGCAAGCCCGGAAGCTTTCTGCAAAACCAAGGGGGCCAGAGCAAAACCACTAGTCCCTGAGGTTG  
CCGAGTGGCCGACGGGCCCCACTCCCTTGAGGGTCCAGAGCTACGAGGCTATGAGGGTGAAGGAGGAGGAGGAGTGGTATATCCCCCGGCTATGGGCTGGCGCAGGG  
GGCGGGCCCGCTGTCCCGAGGAGGAGTGGGCTCAGATGAGGATGCCATCGATCCTGACCTGATGGCCCTTGGCCACAAGATCATCCATGGGGCGGGCAAACTCCCTGGCCACATGAGGACCCACAG  
GGGAAAGCCCTTTGCTGCGAGGTCTGGGTTTCGATTACCCCGAAGCAGCAAGCTGAAGATCCACATGCGGAAGCACAGGGAGAGCGCCCTACTCGTGGCCGACTGCCAGCCGCTTC  
TGCCAGCCCGCTTCCCTGACAGCTACGACCTCAAGAACCACATGACCTGCATGAGGAGGAGGAGTGGGCTGGGGCAGTGGGCTGGGGCAGTGGGCTGGGGCAGTGGGCTGGG  
CACCTGCAGCGCCACTCAAGGCCAGAAGTGCCTGGAGTGGCGACCCGACGGCGCCGAAGGACGATGCACCACCCCACTACCCGCCACCCCTACTCGGCTGTGCATC  
CCCCGTGGCTTGCCTTCCAAATGGCCACCTGGACACCTTCCGCTCTCTAGCTGCCTTCTGGGAGCAGTCAGCCCCACCGGGCCCGGGTCTACTCCCCGGGGC  
CGCCGGGGCCCGCTGATGACGATGAGGAGGAGGGGACACCCACCCACCCAGGCTGAAGTGCTATGGAGTCTCTTAA

>hg38

ATGGGGAGCCCCGAGGATGACCTGATTGGGATTCATTCCCGGACCACAGCAGTGAGCTCCTGAGCTGCCTCAATGAGCAGCGCCAGCTGGGCCACCTATGTGACCTCAC  
ATCCGACCCAGGGCCTTGAATACCCGACCCACAGGGCTGTGCTAGCTGCCTGTAGCCACTCTTCAAGAAGCTTTCACTGAGGGCCGGTGGCGGAGCTGTACGGGGC  
CGGGGGCAGCGGGACAGCCGCTGGGGGAGCAGGAGCAGGTTGTGTGAGCTGGACTTTGTAGGGCCAGAGGCACTAGGCGCCCTCTTGAATTTGCCTATACAGCCCACT  
TGACACCAGCAGCGCCAAACATGCCCTGTGCTCAGGCTGCCCGCTGTGGAGATCCCGTGTGTCATCGCTGCTTGCATGGAGATTTGCAGGATTTGCGGAGTGGGCTAGAA  
GCTCCAGCCCGGACGAGGATGACTGTGAGAGCGCCCGCCAGTATCTGGAGGCTTTGCCACAGCCACGGCCTCTGGAGTTCCCAATGGTGAAGACAGCCCTCCACAGT  
GCCCTCCcaccacacccaccccgccactTCCGCTGTGCCCGCCGAGCCGCAAGCCCGGAAGCTTTCTGCAAAACCAAGGGGGCCAGAGCAAAACCACTAGTCCCTGAGGTTG  
CCGAGTGGCCGACGGGCCCCACTCCCTTGAGGGTCCAGAGCTACGAGGCTATGAGGGTGAAGGAGGAGGAGGAGTGGTATATCCCCCGGCTATGGGCTGGCGCAGGG  
GGCGGGCCCGCTGTCCCGAGGAGGAGTGGGCTCAGATGAGGATGCCATCGATCCTGACCTGATGGCCCTTGGCCACAAGATCATCCATGGGGCGGGCAAACTCCCTGGCCACATGAGGACCCACAG  
GGGAAAGCCCTTTGCTGCGAGGTCTGGGTTTCGATTACCCCGAAGCAGCAAGCTGAAGATCCACATGCGGAAGCACAGGGAGAGCGCCCTACTCGTGGCCGACTGCCAGCCGCTTC  
CTGCGAGTACGACCTCAAGAACCACATGACCTGCATGAGGAGGAGGAGTGGGCTGGGGCAGTGGGCTGGGGGACAGCTACAGCCCTCCACAGGAACCGCCCTCC  
CTCCTGAGGGGGCCAGAGCTACGAAACCCTATGAGGgtgaggagaagaagaggagctGGTATATCCCCAGCCTATGGGCTGGCGCAGGGTGGCGGGCCCGCCGCTGTCCCGAGA  
GAGCTGGGCTCAGATGAGGATGCCATCGATCCTGACCTGATGGCTTCCAGTCCCTGACCCAGGCAACCACTGGCACACAGGCTGGCAGCGCAAAGCTGTGCTG  
GCAACCGCCGCTCCAGATGCTCAGGAGTGTCTGTCTGCCACAAGATCATCCATGGGGCGGGCAAACTCCCTGCCACATGAGGACCCACAGGCAAGGCAAGGCTTTT  
CTGCGAGGTTCTGGGTTTCGATTCACCCGAAACGACAAGTGAAGATCCACATGCGGAAGCACAGGGAGAGCGCCCTACTCGTGGCCGACTGCCAGCCCGCTTC  
CTGCAGCTACGACCTCAAGAACCACATGACCTGCATGACGGGGACCGCCCTATGAGTGGCCACTTGGCCACAAGGCTTTGCGCAAGGAGGACCCCTCGAGCGCA  
CCTCAAAGCCAGAACTGCTGGAGTGGCGACCCGACGGCGGCAAGGACGATGCACCACCCCACTACCCGCCACCCCTACTCGGCTGTGATCCCGCCGCTGGCCTG  
ACCTTCCAAATGGCCACCTGGACACCTTCCGCTCTCTAGCTCGATTCTGGGAGCAGTCAGCCCCACCGGGCCCGGGTCTACTCCCCGGGGCCTGATGACGATG  
AGGAGGAAGGGGCACCCACCCACCCAGGCTGAAGTGCTATGGAGTCTCTTAA

TGAGGTGCCACAGTGCCCGCCATCCCTGACCTATGAGGAGGAGGAGGTGGCGGCGAGAGTGGGCAGCAGTGGGGCAGTGGGGCCGGGGACAGCTACAGCCCTCC  
ACAGGAACCTGCCCTCCCTGAGGTCCAGAGCTCCAGAGCTACGAACCTATGAGGTTGAGGAAGAAGAAGAGGAGCTGGTATATCCCCAGCCCTATGGGCTGGCGCAGGGTGG  
CGGGCCCCCGCTGTCCACAGAGGAGCTGGGCTCAGATGAGGATGCCATCGATCCTGACCTGATGCCCTACCTAAGCTCCCTGCACCAGGACAACCTGGCACCAGGCTGG  
ACAGCCAAAGACAAAGCTGGTGGCGAAACGCCGCTCCAGATGCCCTCAGGAGTGGCCCTGTCTGCCACAAGATCATCCATGGGGCAGGCAAACTGCCTGCCACATGAGGACC  
CACACAGCGAGAAAGCCCTTTGCCCTGCGAGGTCTGCGGTGTTGATTACCCAGGAACGACAAGCTGAAGATCCACATGGCGAAGCACAGGGAGAGCGCCCTACTCATGTC  
CCGACTGCCACCGCTTCTGTCACAGCTACGACCTCAAGAACCACATGCACCTGCACACAGGGGACCGGCCCTATGAGTGGCACCCTGTGCCAAAGCCTTTCCGCCAAG  
GAGGACACCTGCGAGCGCTCAAGAGGCCAGAAGTGCCTGAGGTTGCGAGTGGCAGCCGACCGGCGCAAGGACAGATGCACCACCCCTACCCACACCTCTACCGCTGC  
TGCATCCCCCGTGGCTCGACCTCTCAATGGCCACCTGGACACCTTCCGCTCTCTAGCTCGATTCTGGGAGCAGTCAGCCCCACTGGGCCCGGCTCTACCCC  
AGGGCCCCCTGATGAGGATGAGGAGGAAGGGGCACCCACACCCAGGCTGAAGGTGCCATGGAGTCTCTTAA

>macFas5

ATGGGGAGCCCCGAGGATGACCTGATTGGGATTCATTCCCGGACCACAGCAGTGAAGTCTGAGCTGCCTCAATGAGCAGCGCCAGCTGGGCCACCTATGTGACCTCAC  
ATCCGGACGCAGGGCTTGAATACCGCACCCACAGGGCTGTGCTAGCTGCCTGTAGCCACTACTTCAAGAAGCTATTCACCTGAGGGCGGTGGCGGAGCTGTCATGGGGCT  
GGGGCAGCGGGACAGCCACTGGGGGAGCAGGAGCAGGCGTGTGTGAGTGGACTTTGAGGGCCAGAGGCACTAGGGCCCTCCTTGAATTTGCCTATACAGCCACT  
GACCACAGCAGCGCAACATGCCAGCTGTGCTCCAGGCTGCCCGCTGCTGGAGATCCCGTGTGTCATCGCTGCTTGCATGGAGATTTGCAGGGCAGTGGGCTAGAAG  
TGACCACAGCAGCGCAACATGCCAGCTGTGCTCCAGCTGCCCGCTGCTGGAGATCCCGTGTGTCATGGGGCGGGCAAACTGCCTGCACATGGCCACCTCCACAGGTC  
CCTCCcaacacactccaccgcaaccTGGCCCTGTTGCCCGCGCACAGCCGCAAGCCCGGAAAGCTTTCCTGCAAAACCAAGGGGGCCAGAGCAAACTAGTCCCTCAGGAGTGC  
CCGAGTACTGCCATCCCTTGAATGAGGAGGAGGAGGTGGCGGTTAGATGGGCGAGTGGGGCAGTGGGGCAGTACAGCTCCACAGGAAAC  
CGCTCCCTCCTGAGGGGCCACAGACTACGAACCTATGAGGTTGAGGAAGAAGAAGAGGAGTGGTATATCCCCAGCTATGGGCTGGCCAGGGTGGCGGGCC  
CGCTGTCCACAGAGGAGTGGGCTCAGATGAGGATGCCATCGATCCTGACCTGATGGCTACCTAAGCTCCCTGCACCAGGACAACCTGGCACCAGGCTGGATGGCC  
AGACAAGCTGGTGGCGAAACGCCGCTCCAGATGCCCTCAGGAGTGGCTGATCCAGGAGTGGCTGATGGGGCGGGCAAACTGCCTGCACATGGCCACCTCCACAG  
GCGAGAAAGCCTTTGCTGCGAGGTCTGCGGTGTTGATTACCCGGAACGACAAGCTGAAGATCCACATGGCGAAGCACAGGGAGAGCGCCCTACTCGTCCGCGCAC  
TGCCACGCCCTTCCCTGACAGCTACGACCTCAAGAACCACATGCACCTGCACACGGGACCGGCCCTATGAGTGGCACCCTGTGCCACAAGCTTTGCCAAAGGAGAC  
CACCTGCAGCGCCACTCAAGGCCAGAAGTGCCTGGAGTGGCGACCCGACGGCGCGCAAGGACGATGCACCACCCACTACCCGCCACCTCTACGGCTGCTGCATC  
CCCCGCTGCGCTGCACCTCAATGGCCACCTGGACACCTTCCGCTCTCTAGCTCGATTCTGGGAGCAGTCAGCCCCACCGGGCCCCGGTCTCTACCCGGGGC  
CCCCGTGATGAGATGAGGAGGAAGGGGCACCCACACCCAGGCTGAAGGTGCCATGGAGTCTCTTAA

>nomLeu3

ATGGGGAGCCCCGAGGATGACCTGATTGGGATTCATTCCCGGACCACAGCAGTGAAGTCTGAGCTGCCTCAATGAGCAGCGCCAGCTGGGCCACCTATGTGACCTCAC  
ATCCGGACGCAGGGCTTGAATACCGCACCCACAGGGCTGTGCTAGCTGCCTGTAGCCACTACTTCAAGAAGCTTTTCACTGAGGGCGGTGGCGGAGCTGTCATGGGGCT  
GGGGCAGCGGGACCGCCGCTGGGGGAGCAGGGGCTGGCGTGTGTGAGTGGACTTTGAGGGCCAGAGGCACTAGGGCCCTCCTTGAATTTGCCTATACAGCCACTAC  
TGACCACAGCAGCGCAACATGCCAGCTGTGCTCCAGCTGCCCGCTGCTGGAGATCCCGTGTGTCATGGGGCGGGCAAACTGCCTGCACATGGCCACCTCCACAGGTC  
CTCCAGCCAGCAGGAGTGAAGTGTGAGCGAGCCGCCAGTATCTGGAGGCTTTGCCACAGCCAGCGCTGCTGGAGTTCCTCAATGGTGAAGACAGTCTCCACAGGTC  
CCCTCAGCCACCTCCGCGACGCTCCGCGCTGTTGCCCGCGCACAGCCGCAAGCCCGGAAAGCTTTCTGCAAAACCAAGGGGGCCAGAGCAAACTAGTCCCTC  
TGAGGTGCCACAGTGGCCACCTCCCTTGAACCTATGATGAGGAGGAGTGGCAGGCAAGTGGGCAGCAGTGGGGCAGTGGGCTGGGGGACAGCTACAGCCCTCC  
ACAGGAACCTGCCCTCCCTCCTGAGGGGCCACAGAGCTACGAACCTATGAGGTTGAGGAAGAAGAAGAGGAGTGGTATATCCCCAGCTATGGGCTGGCACAAGGTTGG  
GGGGCCCCGCTGTCCCGAGGAGGCTGGGCTCAGATGAGGATGCCATCGATCCTGACCTGATGGGCCACAGGCAACCTGCTGCAATGGTGAAGACAGTCTCCACAGGTC  
ACAGCCAAAGACAAAGCTGGTGGCGAAACGCCGCTCTCAGATGCCCTCAGGAGTGGCTGCTGCCACAAGATCATCCATGGGGCAGGCAAACTGCCTGCCACATGAGGACC  
ACACAGCGGAGAAAGCTTTGCTGCGAGGTCTGCGGTGTTGATTACCCGGAACGACAAGCTGAAGATCCACATGGCGAAGCACACGGGAGAGCGCCCTACTCATG  
CCGACTGCCACGCGCTTCCCTGACAGCTACGACCTCAAGAACCACATGCACCTGCACACGGGGACCGGCCCTATGAGTGGCACCCTGTGCCACAAGGCTTTGCCAAAG  
GAGGACCACTACAGCGCCACTCAAGGCCAGAAGTGCCTGGAGTGGCGACCCGACGGCGCGCAAGGACGATGCACCACCCACTACCCGCCACCTCTACCGCTGTC  
TGATCCCCCGCTGGCTGCACCTTCAATGGCCACCTGGACACCTTCCGCTCTCTAGCTCGATTCTGGGAGCAGTCAGCCCCACCGGGCCCCGGTCTCTACCCC  
GGGGCCCCCTGATGAGGATGAGGAGGAAGGGGCACCCACACCCAGGCTGAAGGTGCCATGGAGTCTCTTAA

>ponAbe2

ATGGGGAGCCCCGAGGATGATCTGATTGGGATTCATTCCCGGACCACAGCAGTGAAGTCTGAGCTGCCTCAATGAGCAGCGCCAGCTGGGCCACCTATGTGACCTCAC  
ATCCGGACGCAGGGCTTGAATACCGCACCCACAGGGCTGTGCTAGCTGCCTGTAGCCACTACTTCAAGAAGCTTTTCACTGAGGGTGGTGGCGGAGCTGTCATGGGGCC  
GGGGCAGCGGGACCGCCGCTGGGGGAGCAGGGGCTGGCGTGTGTGAGTGGACTTTGAGGGCCAGAGGCACTAGGGCCCTCCTTGAATTTGCCTATACAGCCACTAC  
TGACCACAGCAGCGCAACATGCCAGCTGTGCTCCAGCTGCCCGCTGCTGGAGATCCCGTGTGTCATCGCTGCTTGCATGGAGATTTGCAGGGCAGTGGGCTAGAAG  
CTCCAGCCGAGCAGGATGACTGTGAGCGAGCCGCCAGTATCTGGAGGCTTTGCCACAGCCAGCGCTGCTGGAGTTCCTCAATGGTGAAGACAGTCTCCACAGGTC  
CCCTCCACACCTCCGCCACCGCCACCTCGGCTGTTGCCCGCGCACAGCCGCAAGCCCGGAAAGCTTTCTGCAAAACCAAGGGGGCCAGAGCAAACTAGTCCCTC  
TGAGGTGGCCACAGTGCCTGCCATCCTTTGACCTATGAGGAGGAGGAGTGGCGGGCAGAGTGGGCAGCAGTGGGGGCAAGTGGGCTGGGGGACAGCTACAGCCCTCC  
ACAGGAACCTGCCCTCCCTCCTGAGGGGGCCCCAGAGCTACGAACCTATGAGGTTGAGGAAGAAGAAGAGGAGTGGTATATCCCCAGCTATGGGCTGGCACAAGGTTGG  
TGGGCCCGCTGTCCCGAGGAGGCTGGGCTCAGATGAGGATGCCATCGATCCTGACCTGATGGGCCACTAAGCTCCCTGCACCAGGACAACCTGGCACCAGGCTGG  
ACAGCCAAAGACAAGCTGGTGGCGAAACGCCGCTCCAGATGCCCTCAGGAGTGGCTGCTGCCACAAGATCATCCATGGGGCAGGCAAACTGCCTGCCACATGAGGAG  
CACACAGGCGAGAAGCCTTTGCTGCGAGGTCTGCGGTGTTGATTACCCGGAACGACAAGCTGAAGATCCACATGGCGAAGCACACGGGAGAGCGCCCTACTCATG  
CCCGCACTGCCAGCCGCTTCCCTGACAGCTACGACCTCAAGAACCACATGCACCTGCACACGGGGACCGGCCCTATGAGTGGCACCCTGTGCCATAAGGCTTTGCCAA  
GGAGGACCACTGCAGCGCCACTCAAGGCCAGAAGTGCCTGGAGTGGCGACCCGACGGCGCGCAAGGACGATGCACCACCCACTACCCGCCACCTCTACCGCTG  
GCTGCATCCCCCGCTGGCTGCACCTTCAATGGCCACCTGGACACCTTCCGCTCTCTAGCTCGATTCTGGGAGCAGTCAGCCCCACTGGGCCCGGCTCTTACC  
CGGGGCCCTGATGAGGATGAGGAGGAAGGGGCACCCACACCCAGGCTGAAGGTGCCATGGAGTCTCTTAA

>rheMac3

ATGGGGAGCCCCGAGGATGACCTGATTGGGATTCATTCCCGGACCACAGCAGTGAAGTCTGAGCTGCCTCAATGAGCAGCGCCAGCTGGGCCACCTATGTGACCTCAC  
ATCCGGACGCAGGGCTTGAATACCGCACCCACAGGGCTGTGCTAGCTGCCTGTAGCCACTACTTCAAGAAGCTTTTCACTGAGGGTGGTGGCGGAGCTGTCATGGGGCC  
CGGGGCGAGCGGGACAGCCACTGGGGGAGCAGGAGCAGGCGTGTGTGAGTGGACTTTGAGGGCCAGAGGCACTAGGGCCCTCCTTGAATTTGCCTATACAGCCACTAC  
TGACCACAGCAGCGCAACATGCCAGCTGTGCTCCAGCTGCCCGCTGCTGGAGATCCCGTGTGTCATCGCTGCTTGCATGGAGATTTGCAGGGCAGTGGGCTAGAAG  
CTCCAGCCGAGCAGGAGTGAAGTGTGAGCGAGCCGCCAGTATCTGCAGGCTTTGCCACAGCCAGCGCTGCTGGAGTTCCTCAATGGTGAAGACAGTCTCCACAGGTC  
CCCTCCACACCTCCACACCGCCACCTCGGCTGTTGCCCGCGCACAGCCGCAAGCCCGGAAAGCTTTCTGCAAAACCAAGGGGGCCAGAGCAAACTAGTCCCTC  
GAGGTGCCCGCAGTACTGCCATCCTTTGACCTATGAGGAGGAGGAGTGGCGGGTGAAGTGGGCAGCAGTGGGGCAGTGGGCTGGGGGACAGCTACAGCCCTCCCA  
CAGGAACCCCTCCCTCCTGAGGGGCCACAGACTACGAACCTATGAGGTTGAGGAAGAAGAAGAGGAGTGGTATATCCCCAGCTATGGGCTGGCACAAGGTTGG  
GGCCCCGCTGTCCCGAGGAGGCTGGGCTCAGATGAGGATGCCATCGATCCTGACCTGATGGGCCACTAAGCTCCCTGCACCAGGACAACCTGGCACCAGGCTGG  
GGCCCCGCTGTCCCGAGGAGGCTGGGCTCAGATGAGGATGCCATCGATCCTGACCTGATGGGCCACTAAGCTCCCTGCACCAGGACAACCTGGCACCAGGCTGG  
TGCCAAAGACAAGCTGGTGGCGAAACGCCGCTCCAGATGCCCTCAGGAGTGGCTGCTGCCACAAGATCATCCATGGGGCAGGCAAACTGCCTGCCACATGAGGAGCC  
ACACAGGCGAGAAGCCTTTGCTGCGAGGTCTGCGGTGTTGATTACCCGGAACGACAAGCTGAAGATCCACATGGCGAAGCACACGGGAGAGCGCCCTACTCGTGC  
CCGACTGCCAGCCGCTTCCCTGACAGCTACGACCTCAAGAACCACATGCACCTGCACACGGGGACCGGCCCTATGAGTGGCACCCTGTGCCATAAGGCTTTGCCAA  
GAGGACCACTGCAGCGCCACTCAAGGCCAGAAGTGCCTGGAGTGGCGACCCGACGGCGCGCAAGGACGATGCACCACCCACTACCCGCCACCTCTACCGCTG  
CTGCATCCCCCGCTGGCTGCACCTTCAATGGCCACCTGGACACCTTCCGCTCTCTAGCTCGATTCTGGGAGCAGTCAGCCCCACTGGGCCCGGCTCTTACC  
CGGGGCCCTGATGAGGATGAGGAGGAAGGGGCACCCACACCCAGGCTGAAGGTGCCATGGAGTCTCTTAA
